# Supplementary material for: Comparative transcription analysis of different Antirrhinum phyllotaxy nodes identifies major signal networks involved in vegetative-reproductive transition
Source: PLoS One. 2017 Jun 1;12(6):e0178424. doi: 10.1371/journal.pone.0178424 (PMC5453694; doi:10.1371/journal.pone.0178424)
Supplement: S7 Table — (XLS) [file pone.0178424.s009.xls]

## Sheet: T2_vs_T3.annotation
Table S7 DEGs annotated between T2 and T3
ID	T2	T3	FDR	log2FC	regulated	COG_class_annotation	GO_annotation	KEGG_annotation	Swissprot_annotation	nr_annotation
c14403.graph_c0	16.6747	5.61203	2.81174e-05	-1.51665	down	--	Biological Process: MAPK cascade (GO:0000165);; Molecular Function: sequence-specific DNA binding transcription factor activity (GO:0003700);; Cellular Component: nucleus (GO:0005634);; Biological Process: protein targeting to membrane (GO:0006612);; Molecular Function: zinc ion binding (GO:0008270);; Biological Process: response to bacterium (GO:0009617);; Biological Process: systemic acquired r…	--	Zinc finger protein CONSTANS-LIKE 5 OS=Arabidopsis thaliana GN=COL5 PE=2 SV=2	Zinc finger protein CONSTANS-LIKE 5, putative [Theobroma cacao]
c32906.graph_c0	4.18282	0.766048	3.01305e-05	-2.30411	down	Function unknown	--	--	Vacuolar iron transporter homolog 4 OS=Arabidopsis thaliana GN=At3g43660 PE=2 SV=1	PREDICTED: vacuolar iron transporter homolog 4-like [Solanum lycopersicum]
c31599.graph_c0	21.006	9.88449	9.56058e-06	-1.05405	down	--	Cellular Component: plasma membrane (GO:0005886);;	--	Bromodomain testis-specific protein OS=Mus musculus GN=Brdt PE=1 SV=3	PREDICTED: uncharacterized protein LOC101244424 [Solanum lycopersicum]
c42509.graph_c0	3.9928	0.850718	1.37115e-05	-2.12084	down	--	Biological Process: regulation of cellular process (GO:0050794);;	--	Zinc finger protein CONSTANS-LIKE 5 OS=Arabidopsis thaliana GN=COL5 PE=2 SV=2	unnamed protein product [Vitis vinifera]
c32331.graph_c0	17.5596	7.65071	0.00443004	-1.15332	down	--	--	--	--	predicted protein [Populus trichocarpa]
c37869.graph_c0	13.8374	5.96117	1.75997e-06	-1.17931	down	--	Cellular Component: extracellular region (GO:0005576);; Molecular Function: polysaccharide binding (GO:0030247);;	--	--	conserved hypothetical protein [Ricinus communis]
c25898.graph_c0	5.68827	1.88582	0.000657009	-1.52788	down	Function unknown	Biological Process: response to iron ion (GO:0010039);;	--	Vacuolar iron transporter homolog 4 OS=Arabidopsis thaliana GN=At3g43660 PE=2 SV=1	PREDICTED: vacuolar iron transporter homolog 4-like [Cicer arietinum]
c14872.graph_c0	11.4446	4.1221	7.28206e-09	-1.43419	down	--	Biological Process: anion transport (GO:0006820);; Cellular Component: intracellular membrane-bounded organelle (GO:0043231);; Cellular Component: cytoplasmic part (GO:0044444);; Biological Process: intracellular transport (GO:0046907);; Biological Process: regulation of biological process (GO:0050789);; Biological Process: response to stimulus (GO:0050896);; Biological Process: organic substance…	--	--	hypothetical protein M569_15381 [Genlisea aurea]
c14746.graph_c0	6.36155	2.36735	1.28443e-07	-1.38619	down	Defense mechanisms	Cellular Component: plasma membrane (GO:0005886);; Biological Process: drug transmembrane transport (GO:0006855);; Biological Process: cellular iron ion homeostasis (GO:0006879);; Molecular Function: citrate transmembrane transporter activity (GO:0015137);; Molecular Function: drug transmembrane transporter activity (GO:0015238);; Molecular Function: antiporter activity (GO:0015297);; Biological …	--	MATE efflux family protein FRD3 OS=Arabidopsis thaliana GN=FRD3 PE=1 SV=1	PREDICTED: MATE efflux family protein FRD3-like [Vitis vinifera]
c33949.graph_c0	3.18845	0.249655	4.17207e-10	-3.39482	down	General function prediction only	Biological Process: response to hormone (GO:0009725);; Molecular Function: transferase activity (GO:0016740);;	--	Uncharacterized WD repeat-containing protein alr3466 OS=Nostoc sp. (strain PCC 7120 / UTEX 2576) GN=alr3466 PE=4 SV=1	Transducin/WD40 repeat-like superfamily protein [Theobroma cacao]
c36947.graph_c0	45.4427	17.9906	4.82947e-14	-1.30627	down	--	Molecular Function: DNA binding (GO:0003677);; Molecular Function: chromatin binding (GO:0003682);; Molecular Function: sequence-specific DNA binding transcription factor activity (GO:0003700);; Cellular Component: nucleus (GO:0005634);; Biological Process: regulation of transcription, DNA-templated (GO:0006355);; Biological Process: response to salt stress (GO:0009651);; Biological Process: resp…	--	Transcription factor ASG4 OS=Arabidopsis thaliana GN=ASG4 PE=2 SV=1	PREDICTED: transcription factor ASG4-like [Solanum lycopersicum]
c28232.graph_c0	10.5192	3.65647	1.26121e-13	-1.49026	down	--	Molecular Function: binding (GO:0005488);;	--	Uncharacterized mitochondrial protein AtMg00810 OS=Arabidopsis thaliana GN=AtMg00810 PE=4 SV=1	hypothetical protein VITISV_039432 [Vitis vinifera]
c36102.graph_c0	33.6791	9.01505	0	-1.87133	down	--	Biological Process: cellular component organization (GO:0016043);; Biological Process: single-organism cellular process (GO:0044763);;	--	Fap1 adhesin OS=Streptococcus parasanguis GN=fap1 PE=1 SV=1	hypothetical protein Kpol_1058p4 [Vanderwaltozyma polyspora DSM 70294]
c32903.graph_c0	8.02644	2.64595	2.67869e-05	-1.54486	down	--	--	--	--	PREDICTED: uncharacterized protein LOC101254072 [Solanum lycopersicum]
c27959.graph_c1	10.5011	4.99801	0.00356377	-1.03201	down	--	--	--	CBS domain-containing protein CBSX5 OS=Arabidopsis thaliana GN=CBSX5 PE=2 SV=2	PREDICTED: CBS domain-containing protein CBSX5 [Vitis vinifera]
c32552.graph_c1	12.2797	5.03626	0.000598224	-1.24045	down	--	Molecular Function: signal transducer activity (GO:0004871);; Cellular Component: nucleus (GO:0005634);; Biological Process: calcium ion transport (GO:0006816);; Biological Process: Golgi organization (GO:0007030);; Biological Process: signal transduction (GO:0007165);; Biological Process: phototropism (GO:0009638);; Biological Process: response to salt stress (GO:0009651);; Biological Process: p…	--	Root phototropism protein 2 OS=Arabidopsis thaliana GN=RPT2 PE=1 SV=2	PREDICTED: root phototropism protein 2-like [Solanum lycopersicum]
c41848.graph_c0	16.7633	8.11766	0.000121621	-1.0118	down	Lipid transport and metabolism	Molecular Function: catalytic activity (GO:0003824);;	--	Presqualene diphosphate phosphatase OS=Mus musculus GN=Ppapdc2 PE=1 SV=1	PnFL-1 [Ipomoea nil]
c37946.graph_c2	11.1206	4.99875	1.52114e-06	-1.11969	down	General function prediction only	Cellular Component: intracellular part (GO:0044424);; Biological Process: cellular process involved in reproduction (GO:0048610);; Biological Process: pollen tube development (GO:0048868);;	--	Uncharacterized WD repeat-containing protein C3H5.08c OS=Schizosaccharomyces pombe (strain 972 / ATCC 24843) GN=SPAC3H5.08c PE=1 SV=2	PREDICTED: WD repeat-containing protein 44-like [Vitis vinifera]
c29068.graph_c0	10.2275	4.94393	0.000709515	-1.01257	down	--	--	--	--	unnamed protein product [Vitis vinifera]
c31520.graph_c0	103.455	34.1045	9.32587e-15	-1.56611	down	--	--	--	Organ-specific protein S2 OS=Pisum sativum PE=2 SV=1	epicotyl-specific tissue protein [Striga asiatica]
c39551.graph_c0	84.586	39.4793	1.42584e-10	-1.0702	down	--	--	--	Dentin sialophosphoprotein OS=Homo sapiens GN=DSPP PE=1 SV=2	PREDICTED: uncharacterized protein LOC100257088 [Vitis vinifera]
c22550.graph_c0	5.86525	1.57086	4.1884e-07	-1.8348	down	--	Molecular Function: calmodulin binding (GO:0005516);; Cellular Component: mitochondrion (GO:0005739);; Biological Process: auxin-activated signaling pathway (GO:0009734);;	K14488|1e-50|vvi:100257133|hypothetical protein LOC100257133	Indole-3-acetic acid-induced protein ARG7 OS=Vigna radiata var. radiata GN=ARG7 PE=2 SV=1	PREDICTED: indole-3-acetic acid-induced protein ARG7-like [Solanum lycopersicum]
c42357.graph_c0	4.88918	1.30765	3.3889e-06	-1.83096	down	--	--	--	Transcription factor TGA5 OS=Arabidopsis thaliana GN=TGA5 PE=1 SV=2	PREDICTED: TGACG-sequence-specific DNA-binding protein TGA-2.1-like [Fragaria vesca subsp. vesca]
c37148.graph_c0	8.6706	3.38489	6.34772e-05	-1.31226	down	--	Molecular Function: transporter activity (GO:0005215);; Cellular Component: plasma membrane (GO:0005886);; Biological Process: oligopeptide transport (GO:0006857);; Biological Process: response to nematode (GO:0009624);; Cellular Component: integral component of membrane (GO:0016021);;	--	Probable peptide/nitrate transporter At1g59740 OS=Arabidopsis thaliana GN=At1g59740 PE=2 SV=1	PREDICTED: probable peptide/nitrate transporter At1g59740-like [Solanum lycopersicum]
c29006.graph_c0	21.8798	7.30116	9.57012e-14	-1.54795	down	--	--	--	--	PREDICTED: uncharacterized protein LOC100266436 [Vitis vinifera]
c30085.graph_c0	4.27494	0.89235	4.05769e-07	-2.16384	down	Secondary metabolites biosynthesis, transport and catabolism	Molecular Function: iron ion binding (GO:0005506);; Cellular Component: endoplasmic reticulum (GO:0005783);; Molecular Function: electron carrier activity (GO:0009055);; Biological Process: gibberellin biosynthetic process (GO:0009686);; Molecular Function: oxygen binding (GO:0019825);; Molecular Function: heme binding (GO:0020037);; Molecular Function: ent-kaurenoate oxidase activity (GO:0051777…	K04123|0.0|vvi:100251295|hypothetical protein LOC100251295	Ent-kaurenoic acid oxidase 1 OS=Arabidopsis thaliana GN=KAO1 PE=2 SV=1	PREDICTED: ent-kaurenoic acid oxidase 2 [Vitis vinifera]
c41506.graph_c0	19.8692	1.42399	0	-3.67013	down	General function prediction only	--	--	dCTP pyrophosphatase 1 OS=Bos taurus GN=DCTPP1 PE=2 SV=1	RS21-C6, EAR, NTP pyrophosphohydrolase MazG catalytic core, putative [Theobroma cacao]
c33773.graph_c0	8.85215	1.86903	5.83312e-07	-2.14756	down	--	--	--	--	uncharacterized protein [Arabidopsis thaliana]
c4882.graph_c0	0.988839	0.0464554	0.00485823	-3.4173	down	Inorganic ion transport and metabolism	Molecular Function: N,N-dimethylaniline monooxygenase activity (GO:0004499);; Molecular Function: flavin adenine dinucleotide binding (GO:0050660);; Molecular Function: NADP binding (GO:0050661);; Biological Process: oxidation-reduction process (GO:0055114);;	--	Probable flavin-containing monooxygenase 1 OS=Arabidopsis thaliana GN=FMO1 PE=2 SV=1	PREDICTED: probable flavin-containing monooxygenase 1 [Vitis vinifera]
c34519.graph_c0	4.32682	1.41	0.00990065	-1.53752	down	--	--	--	Classical arabinogalactan protein 26 OS=Arabidopsis thaliana GN=AGP26 PE=2 SV=2	Uncharacterized protein TCM_021121 [Theobroma cacao]
c19481.graph_c0	11.5584	1.62904	1.36557e-14	-2.72833	down	--	--	--	--	PREDICTED: uncharacterized protein LOC100261790 [Vitis vinifera]
c41906.graph_c0	25.8039	10.6366	6.58296e-12	-1.24754	down	Amino acid transport and metabolism	Molecular Function: transporter activity (GO:0005215);; Biological Process: transport (GO:0006810);; Cellular Component: membrane (GO:0016020);;	--	Probable peptide/nitrate transporter At1g59740 OS=Arabidopsis thaliana GN=At1g59740 PE=2 SV=1	PREDICTED: probable peptide/nitrate transporter At1g27040-like [Solanum lycopersicum]
c29993.graph_c0	30.2592	14.0249	4.56763e-06	-1.07583	down	--	Molecular Function: copper ion binding (GO:0005507);; Cellular Component: plasma membrane (GO:0005886);; Molecular Function: electron carrier activity (GO:0009055);; Biological Process: glucuronoxylan metabolic process (GO:0010413);; Cellular Component: anchored component of membrane (GO:0031225);; Biological Process: xylan biosynthetic process (GO:0045492);;	--	Blue copper protein OS=Pisum sativum PE=2 SV=1	PREDICTED: blue copper protein [Vitis vinifera]
c27659.graph_c1	130.955	62.4365	6.19621e-08	-1.03799	down	Amino acid transport and metabolism	Molecular Function: glutamate-ammonia ligase activity (GO:0004356);; Molecular Function: copper ion binding (GO:0005507);; Molecular Function: protein binding (GO:0005515);; Molecular Function: ATP binding (GO:0005524);; Cellular Component: cell wall (GO:0005618);; Cellular Component: plasma membrane (GO:0005886);; Biological Process: glutamine biosynthetic process (GO:0006542);; Biological Proce…	K01915|6e-82|vvi:100266191|GS, 1, GS1, GS1-1	Glutamine synthetase nodule isozyme OS=Vigna aconitifolia PE=2 SV=1	glutamine synthetase [Gossypium raimondii]
c14195.graph_c0	32.8143	12.2972	1.35532e-11	-1.38214	down	--	--	--	--	hypothetical protein PRUPE_ppa013663mg [Prunus persica]
c14694.graph_c0	7.47138	3.21732	5.23261e-06	-1.17902	down	--	--	--	Cyclic dof factor 2 OS=Arabidopsis thaliana GN=CDF2 PE=1 SV=2	PREDICTED: dof zinc finger protein DOF5.2-like [Vitis vinifera]
c41540.graph_c0	32.6182	10.0763	0	-1.66156	down	--	Molecular Function: binding (GO:0005488);; Biological Process: response to hormone (GO:0009725);; Biological Process: response to lipid (GO:0033993);; Biological Process: response to oxygen-containing compound (GO:1901700);;	--	Transcription factor ASG4 OS=Arabidopsis thaliana GN=ASG4 PE=2 SV=1	transcription factor 1R-MYB1 [Chimonanthus praecox]
c15392.graph_c0	9.63767	4.16554	3.08848e-05	-1.17216	down	Function unknown	Molecular Function: serine-type endopeptidase activity (GO:0004252);; Cellular Component: cell wall (GO:0005618);; Cellular Component: nucleus (GO:0005634);; Biological Process: protein folding (GO:0006457);; Biological Process: proteolysis (GO:0006508);; Biological Process: response to high light intensity (GO:0009644);; Biological Process: heat acclimation (GO:0010286);; Biological Process: pos…	--	Phosphosulfolactate synthase OS=Methanothermobacter thermautotrophicus (strain ATCC 29096 / DSM 1053 / JCM 10044 / NBRC 100330 / Delta H) GN=comA PE=3 SV=1	hypothetical protein PRUPE_ppa009599mg [Prunus persica]
c36324.graph_c0	4.63587	1.28808	1.51527e-09	-1.79514	down	Energy production and conversion	Cellular Component: extracellular region (GO:0005576);; Molecular Function: UDP-N-acetylmuramate dehydrogenase activity (GO:0008762);; Cellular Component: plastid (GO:0009536);; Biological Process: jasmonic acid metabolic process (GO:0009694);; Biological Process: response to jasmonic acid (GO:0009753);; Biological Process: cytokinin catabolic process (GO:0009823);; Cellular Component: cytoplasmi…	K00279|0.0|pop:POPTR_754101|cytokinin oxidase (EC:1.5.99.12)	Cytokinin dehydrogenase 5 OS=Arabidopsis thaliana GN=CKX5 PE=2 SV=1	cytokinin oxidase [Populus trichocarpa]
c35237.graph_c0	32.896	15.9981	1.01394e-06	-1.00874	down	--	Biological Process: primary metabolic process (GO:0044238);; Molecular Function: metal ion binding (GO:0046872);; Biological Process: biological regulation (GO:0065007);; Biological Process: organic cyclic compound biosynthetic process (GO:1901362);;	--	Putative uncharacterized protein DDB_G0290521 OS=Dictyostelium discoideum GN=DDB_G0290521 PE=4 SV=2	PREDICTED: uncharacterized protein LOC101259160 [Solanum lycopersicum]
c18976.graph_c0	27.0637	10.8145	5.01531e-07	-1.28562	down	Inorganic ion transport and metabolism	Molecular Function: ATP binding (GO:0005524);; Cellular Component: plasma membrane (GO:0005886);; Biological Process: ATP catabolic process (GO:0006200);; Biological Process: ATP biosynthetic process (GO:0006754);; Biological Process: cation transport (GO:0006812);; Molecular Function: hydrogen-exporting ATPase activity, phosphorylative mechanism (GO:0008553);; Cellular Component: integral compon…	K01535|6e-63|pop:POPTR_737523|hypothetical protein	Plasma membrane ATPase 4 OS=Nicotiana plumbaginifolia GN=PMA4 PE=1 SV=1	predicted protein [Populus trichocarpa]
c29420.graph_c1	17.4707	7.79731	0.00334656	-1.12091	down	--	Molecular Function: peptidase activity (GO:0008233);;	--	Probable aspartic protease At2g35615 OS=Arabidopsis thaliana GN=At2g35615 PE=3 SV=1	hypothetical protein M569_14077, partial [Genlisea aurea]
c25002.graph_c0	4.08429	1.43131	0.00017323	-1.45752	down	--	Cellular Component: extracellular region (GO:0005576);; Cellular Component: plasmodesma (GO:0009506);;	--	Cysteine-rich repeat secretory protein 60 OS=Arabidopsis thaliana GN=CRRSP60 PE=1 SV=1	PREDICTED: cysteine-rich repeat secretory protein 60-like [Solanum lycopersicum]
c42129.graph_c0	11.7024	4.10103	6.22397e-09	-1.47257	down	--	Biological Process: iron ion transport (GO:0006826);; Cellular Component: plastid (GO:0009536);; Biological Process: cellular response to iron ion starvation (GO:0010106);; Biological Process: response to nitrate (GO:0010167);; Molecular Function: arsenite transmembrane transporter activity (GO:0015105);; Molecular Function: glycerol transmembrane transporter activity (GO:0015168);; Molecular Fun…	--	Probable aquaporin NIP5-1 OS=Arabidopsis thaliana GN=NIP5-1 PE=2 SV=1	nodulin 26-like intrinsic protein [Solanum tuberosum]
c31653.graph_c0	29.3451	13.8977	0.000322943	-1.04204	down	--	Molecular Function: sequence-specific DNA binding transcription factor activity (GO:0003700);; Cellular Component: nucleus (GO:0005634);; Biological Process: fruit development (GO:0010154);; Biological Process: gene expression (GO:0010467);; Biological Process: negative regulation of auxin mediated signaling pathway (GO:0010930);; Biological Process: cellular macromolecule biosynthetic process (G…	--	Auxin-responsive protein IAA4 OS=Arabidopsis thaliana GN=IAA4 PE=1 SV=2	auxin inducible protein IAA3 [Antirrhinum majus]
c39575.graph_c0	5.31867	1.0324	1.78524e-13	-2.29667	down	--	Molecular Function: sesquiterpene synthase activity (GO:0010334);; Molecular Function: metal ion binding (GO:0046872);; Biological Process: sesquiterpene biosynthetic process (GO:0051762);;	--	(-)-alpha-terpineol synthase OS=Vitis vinifera PE=1 SV=1	limonene synthase [Perilla frutescens]
c32269.graph_c0	13.3613	4.27295	2.246e-09	-1.60076	down	--	--	--	--	conserved hypothetical protein [Ricinus communis]
c30625.graph_c0	15.6309	7.49244	0.000195068	-1.0257	down	--	Molecular Function: iron ion binding (GO:0005506);; Molecular Function: electron carrier activity (GO:0009055);; Molecular Function: flavonoid 3'-monooxygenase activity (GO:0016711);; Molecular Function: heme binding (GO:0020037);; Biological Process: oxidation-reduction process (GO:0055114);;	K09754|1e-159|vvi:100263633|hypothetical protein LOC100263633	Cytochrome P450 98A2 OS=Glycine max GN=CYP98A2 PE=2 SV=1	p-coumarate 3-hydroxylase [Sesamum indicum]
c22203.graph_c0	6.47997	2.07933	2.04551e-07	-1.59066	down	--	--	--	Cyclic dof factor 2 OS=Arabidopsis thaliana GN=CDF2 PE=1 SV=2	PREDICTED: dof zinc finger protein DOF5.2-like [Vitis vinifera]
c42146.graph_c0	11.9606	4.5772	0.00309388	-1.33045	down	--	Molecular Function: protein binding (GO:0005515);; Cellular Component: membrane (GO:0016020);; Biological Process: root hair elongation (GO:0048767);;	--	Arabinogalactan peptide 14 OS=Arabidopsis thaliana GN=AGP14 PE=1 SV=1	hypothetical protein MTR_6g029330 [Medicago truncatula]
c21318.graph_c0	135.844	56.8692	1.24647e-10	-1.22463	down	Transcription	Molecular Function: DNA binding (GO:0003677);; Biological Process: regulation of transcription, DNA-templated (GO:0006355);; Molecular Function: zinc ion binding (GO:0008270);;	--	Glycine-rich protein 2 OS=Nicotiana sylvestris GN=GRP-2 PE=1 SV=1	hypothetical protein M569_00471, partial [Genlisea aurea]
c15311.graph_c0	18.426	7.42099	6.46239e-08	-1.27617	down	--	Molecular Function: sequence-specific DNA binding transcription factor activity (GO:0003700);; Biological Process: regulation of transcription, DNA-templated (GO:0006355);; Biological Process: anthocyanin-containing compound biosynthetic process (GO:0009718);; Molecular Function: sequence-specific DNA binding (GO:0043565);;	--	Probable WRKY transcription factor 12 OS=Arabidopsis thaliana GN=WRKY12 PE=2 SV=1	PREDICTED: probable WRKY transcription factor 12-like [Solanum lycopersicum]
c37841.graph_c0	159.691	63.143	3.33067e-16	-1.30926	down	--	Molecular Function: O-methyltransferase activity (GO:0008171);;	--	3&apos;-hydroxy-N-methyl-(S)-coclaurine 4&apos;-O-methyltransferase OS=Coptis japonica PE=1 SV=1	RS-norcoclaurine 6-O-methyltransferase [Theobroma cacao]
c40911.graph_c0	56.0184	27.2166	2.53114e-07	-1.0107	down	--	Molecular Function: DNA binding (GO:0003677);; Molecular Function: sequence-specific DNA binding transcription factor activity (GO:0003700);; Molecular Function: protein binding (GO:0005515);; Cellular Component: nucleus (GO:0005634);; Cellular Component: cytoplasm (GO:0005737);; Cellular Component: plasma membrane (GO:0005886);; Biological Process: cell death (GO:0008219);; Biological Process: r…	--	Ethylene-responsive transcription factor RAP2-3 OS=Arabidopsis thaliana GN=RAP2-3 PE=1 SV=2	putative ethylene-responsive element binding protein [Salvia miltiorrhiza]
c35883.graph_c0	7.17752	0.474261	0	-3.81047	down	Amino acid transport and metabolism	Molecular Function: asparagine synthase (glutamine-hydrolyzing) activity (GO:0004066);; Molecular Function: ATP binding (GO:0005524);; Biological Process: glutamine metabolic process (GO:0006541);; Biological Process: cellular amino acid catabolic process (GO:0009063);; Biological Process: response to absence of light (GO:0009646);; Biological Process: response to sucrose (GO:0009744);; Biologica…	K01953|0.0|vvi:100241610|hypothetical protein LOC100241610	Asparagine synthetase [glutamine-hydrolyzing] OS=Triphysaria versicolor GN=AS PE=2 SV=3	asparagine synthetase [glutamine-hydrolyzing]-like [Vitis vinifera]
c39365.graph_c0	8.39457	2.67467	0.00114823	-1.5782	down	--	--	--	--	PREDICTED: uncharacterized protein LOC101252159 [Solanum lycopersicum]
c18330.graph_c0	1.86447	0.387429	0.00051476	-2.12564	down	--	--	--	Neurofilament heavy polypeptide OS=Mus musculus GN=Nefh PE=1 SV=3	PREDICTED: uncharacterized protein LOC101264542 [Solanum lycopersicum]
c30668.graph_c0	9.91401	4.00465	0.00329293	-1.25723	down	Posttranslational modification, protein turnover, chaperones	Cellular Component: cytoplasm (GO:0005737);; Molecular Function: electron carrier activity (GO:0009055);; Molecular Function: protein disulfide oxidoreductase activity (GO:0015035);; Biological Process: cell redox homeostasis (GO:0045454);; Biological Process: anther development (GO:0048653);;	--	Monothiol glutaredoxin-S9 OS=Arabidopsis thaliana GN=GRXS9 PE=3 SV=1	glutaredoxin, partial [Genlisea aurea]
c40060.graph_c0	22.5188	10.9747	6.18083e-07	-1.00595	down	Secondary metabolites biosynthesis, transport and catabolism	Molecular Function: copper ion binding (GO:0005507);; Molecular Function: L-ascorbate oxidase activity (GO:0008447);; Biological Process: lignin catabolic process (GO:0046274);; Cellular Component: apoplast (GO:0048046);; Molecular Function: hydroquinone:oxygen oxidoreductase activity (GO:0052716);; Biological Process: oxidation-reduction process (GO:0055114);;	--	Laccase-11 OS=Arabidopsis thaliana GN=LAC11 PE=2 SV=1	laccase, putative [Ricinus communis]
c14805.graph_c0	8.09908	2.78452	0.00116667	-1.47735	down	--	--	--	--	PREDICTED: uncharacterized protein LOC101261064 [Solanum lycopersicum]
c18735.graph_c0	32.9334	11.2191	8.21565e-15	-1.51978	down	--	--	--	--	PREDICTED: uncharacterized protein LOC101253959 [Solanum lycopersicum]
c20003.graph_c0	9.36373	4.18092	0.00831219	-1.11832	down	--	Cellular Component: cytoplasm (GO:0005737);; Biological Process: metal ion transport (GO:0030001);; Molecular Function: metal ion binding (GO:0046872);;	--	Copper transport protein CCH OS=Arabidopsis thaliana GN=CCH PE=1 SV=1	PREDICTED: uncharacterized protein LOC101265035 [Solanum lycopersicum]
c32950.graph_c0	39.6923	15.1414	5.58764e-12	-1.35739	down	Cytoskeleton	Molecular Function: GTPase activity (GO:0003924);; Molecular Function: structural constituent of cytoskeleton (GO:0005200);; Molecular Function: GTP binding (GO:0005525);; Cellular Component: cytoplasm (GO:0005737);; Cellular Component: microtubule (GO:0005874);; Biological Process: GTP catabolic process (GO:0006184);; Biological Process: microtubule-based process (GO:0007017);; Biological Proces…	--	Tubulin beta-1 chain OS=Glycine max GN=TUBB1 PE=1 SV=1	tubulin, beta chain, partial [Genlisea aurea]
c21490.graph_c1	7.24932	1.03068	0.000964123	-2.55353	down	--	--	--	--	PREDICTED: uncharacterized protein LOC101255972 isoform 2 [Solanum lycopersicum]
c36212.graph_c1	6.55188	2.29242	0.000292822	-1.45826	down	--	Cellular Component: extracellular region (GO:0005576);; Cellular Component: plasmodesma (GO:0009506);;	--	--	PREDICTED: uncharacterized protein LOC101259959 isoform 1 [Solanum lycopersicum]
c40725.graph_c0	57.7122	24.9708	1.65168e-11	-1.17845	down	--	Molecular Function: sequence-specific DNA binding transcription factor activity (GO:0003700);; Cellular Component: nucleus (GO:0005634);; Biological Process: cell proliferation (GO:0008283);; Biological Process: shade avoidance (GO:0009641);; Biological Process: response to auxin (GO:0009733);; Biological Process: response to cytokinin (GO:0009735);; Biological Process: unidimensional cell growth…	--	Homeobox-leucine zipper protein HAT4 OS=Arabidopsis thaliana GN=HAT4 PE=1 SV=1	PREDICTED: homeobox-leucine zipper protein HAT4-like isoform 1 [Vitis vinifera]
c26789.graph_c0	11.7826	3.35039	2.23233e-05	-1.74363	down	Carbohydrate transport and metabolism	Cellular Component: extracellular region (GO:0005576);; Cellular Component: cytosol (GO:0005829);; Biological Process: carbohydrate metabolic process (GO:0005975);; Molecular Function: beta-glucosidase activity (GO:0008422);; Cellular Component: plant-type cell wall (GO:0009505);; Cellular Component: plasmodesma (GO:0009506);; Biological Process: systemic acquired resistance (GO:0009627);; Cellul…	--	Xylan 1,4-beta-xylosidase OS=Prevotella ruminicola (strain ATCC 19189 / JCM 8958 / 23) GN=xyl3A PE=1 SV=1	beta-D-glucan exohydrolase-like protein [Arabidopsis thaliana]
c36616.graph_c0	72.4485	31.7652	2.09444e-12	-1.16017	down	Amino acid transport and metabolism	Molecular Function: transporter activity (GO:0005215);; Biological Process: oligopeptide transport (GO:0006857);; Cellular Component: integral component of membrane (GO:0016021);; Biological Process: cellular cation homeostasis (GO:0030003);; Biological Process: divalent metal ion transport (GO:0070838);;	--	Nitrate transporter 1.4 OS=Arabidopsis thaliana GN=NRT1.4 PE=1 SV=1	oligopeptide transporter, putative [Ricinus communis]
c34558.graph_c0	10.8305	5.1733	0.00043791	-1.02977	down	--	--	--	Proline-rich receptor-like protein kinase PERK8 OS=Arabidopsis thaliana GN=PERK8 PE=1 SV=1	hypothetical protein M569_09567, partial [Genlisea aurea]
c38387.graph_c0	8.04674	3.84769	0.00316326	-1.02575	down	--	--	--	Basic 7S globulin 2 OS=Glycine max PE=1 SV=1	Eukaryotic aspartyl protease family protein, putative [Theobroma cacao]
c36181.graph_c1	9.13055	1.73086	6.82121e-05	-2.25533	down	--	Cellular Component: chloroplast (GO:0009507);; Cellular Component: membrane (GO:0016020);;	--	WAT1-related protein At5g07050 OS=Arabidopsis thaliana GN=At5g07050 PE=2 SV=1	PREDICTED: auxin-induced protein 5NG4-like [Glycine max]
c42535.graph_c0	5.27302	1.6882	0.000858031	-1.5731	down	--	--	--	WEB family protein At1g75720 OS=Arabidopsis thaliana GN=At1g75720 PE=2 SV=1	Uncharacterized protein TCM_034217 [Theobroma cacao]
c34398.graph_c0	23.7242	11.2601	1.09682e-06	-1.04314	down	Carbohydrate transport and metabolism	Molecular Function: transporter activity (GO:0005215);; Cellular Component: vacuole (GO:0005773);; Cellular Component: plasma membrane (GO:0005886);; Biological Process: water transport (GO:0006833);; Biological Process: response to osmotic stress (GO:0006970);; Biological Process: response to desiccation (GO:0009269);; Cellular Component: chloroplast (GO:0009507);; Biological Process: response t…	K09872|1e-179|pop:POPTR_735495|aquaporin, MIP family, PIP subfamily	Aquaporin PIP2-1 OS=Arabidopsis thaliana GN=PIP2-1 PE=1 SV=1	aquaporin, MIP family, PIP subfamily [Populus trichocarpa]
c36828.graph_c1	4.4361	1.56228	2.42286e-05	-1.45523	down	General function prediction only	Molecular Function: methyltransferase activity (GO:0008168);; Biological Process: methylation (GO:0032259);; Cellular Component: intracellular organelle (GO:0043229);;	--	Histone-lysine N-methyltransferase SUVR4 OS=Arabidopsis thaliana GN=SUVR4 PE=2 SV=2	PREDICTED: histone-lysine N-methyltransferase SUVR2-like [Solanum lycopersicum]
c33960.graph_c0	3.61987	1.68045	0.00855579	-1.06483	down	--	--	--	--	hypothetical protein VITISV_000452 [Vitis vinifera]
c38324.graph_c1	35.0767	14.9309	7.09193e-10	-1.2004	down	--	--	--	--	Uncharacterized protein TCM_019691 [Theobroma cacao]
c33554.graph_c0	8.84395	2.62796	4.1296e-08	-1.69842	down	Posttranslational modification, protein turnover, chaperones	Molecular Function: zinc ion binding (GO:0008270);;	--	RING-H2 finger protein ATL73 OS=Arabidopsis thaliana GN=ATL73 PE=2 SV=1	RING/U-box superfamily protein [Theobroma cacao]
c18389.graph_c0	13.9883	4.05141	8.85618e-10	-1.73877	down	--	Cellular Component: nucleus (GO:0005634);; Molecular Function: metal ion binding (GO:0046872);;	--	FK506-binding protein 4 OS=Rhizopus delemar (strain RA 99-880 / ATCC MYA-4621 / FGSC 9543 / NRRL 43880) GN=FKBP4 PE=3 SV=1	PREDICTED: uncharacterized protein LOC101267559 [Solanum lycopersicum]
c21919.graph_c0	4.08877	1.38064	0.00210048	-1.49896	down	--	Cellular Component: mitochondrion (GO:0005739);; Cellular Component: endoplasmic reticulum (GO:0005783);; Biological Process: positive regulation of cell proliferation (GO:0008284);; Biological Process: brassinosteroid mediated signaling pathway (GO:0009742);; Biological Process: cell growth (GO:0016049);; Biological Process: positive regulation of organ growth (GO:0046622);; Biological Process: …	--	--	PREDICTED: uncharacterized protein LOC100854957 [Vitis vinifera]
c37657.graph_c1	12.4869	3.73638	0.00274219	-1.65561	down	--	Molecular Function: binding (GO:0005488);; Biological Process: single-organism cellular process (GO:0044763);; Biological Process: regulation of cellular process (GO:0050794);;	--	--	PREDICTED: transcription activator GLK1-like [Vitis vinifera]
c35711.graph_c2	10.2587	3.56969	8.01468e-05	-1.46902	down	Amino acid transport and metabolism	Molecular Function: cysteine synthase activity (GO:0004124);; Cellular Component: nucleus (GO:0005634);; Cellular Component: peroxisome (GO:0005777);; Cellular Component: plasma membrane (GO:0005886);; Biological Process: cysteine biosynthetic process from serine (GO:0006535);; Biological Process: aging (GO:0007568);; Cellular Component: chloroplast (GO:0009507);; Biological Process: response to …	K01738|1e-134|vvi:100264196|hypothetical protein LOC100264196	Cysteine synthase OS=Solanum tuberosum PE=2 SV=1	cysteine synthase [Nicotiana plumbaginifolia]
c14280.graph_c0	560.617	162.259	0	-1.7595	down	--	--	--	Haze protective factor 1 OS=Saccharomyces cerevisiae (strain ATCC 204508 / S288c) GN=HPF1 PE=1 SV=2	hypothetical protein SORBIDRAFT_02g028160 [Sorghum bicolor]
c25140.graph_c0	66.6635	18.2216	0	-1.84126	down	--	--	--	Protein LHY OS=Arabidopsis thaliana GN=LHY PE=1 SV=2	PREDICTED: protein LHY-like [Vitis vinifera]
c19689.graph_c0	30.4791	12.4437	5.6774e-08	-1.25711	down	--	Molecular Function: intracellular cAMP activated cation channel activity (GO:0005222);; Molecular Function: inward rectifier potassium channel activity (GO:0005242);; Molecular Function: calcium channel activity (GO:0005262);; Molecular Function: calmodulin binding (GO:0005516);; Cellular Component: plasma membrane (GO:0005886);; Biological Process: nitric oxide mediated signal transduction (GO:0…	--	Cyclic nucleotide-gated ion channel 2 OS=Arabidopsis thaliana GN=CNGC2 PE=1 SV=1	PREDICTED: cyclic nucleotide-gated ion channel 2-like isoform 2 [Solanum lycopersicum]
c31587.graph_c0	1.6287	0.586621	0.00883327	-1.40723	down	General function prediction only	--	--	Ankyrin-2 OS=Mus musculus GN=Ank2 PE=1 SV=2	PREDICTED: ankyrin-2-like [Vitis vinifera]
c14866.graph_c0	7.44801	2.84481	1.12618e-06	-1.34778	down	--	Molecular Function: serine-type carboxypeptidase activity (GO:0004185);; Biological Process: proteolysis (GO:0006508);;	K13289|0.0|rcu:RCOM_1062290|serine carboxypeptidase, putative (EC:3.4.16.6)	Serine carboxypeptidase-like 31 OS=Arabidopsis thaliana GN=SCPL31 PE=2 SV=2	PREDICTED: serine carboxypeptidase-like 31-like [Vitis vinifera]
c41467.graph_c0	26.3531	12.8874	2.07868e-06	-1.00055	down	--	--	--	Stem-specific protein TSJT1 OS=Nicotiana tabacum GN=TSJT1 PE=2 SV=1	PREDICTED: stem-specific protein TSJT1-like [Solanum lycopersicum]
c31570.graph_c0	19.4701	3.98449	0	-2.23641	down	Function unknown	--	--	Vacuolar iron transporter homolog 4 OS=Arabidopsis thaliana GN=At3g43660 PE=2 SV=1	PREDICTED: vacuolar iron transporter homolog 4-like [Solanum lycopersicum]
c35724.graph_c0	17.6941	7.13864	1.4384e-07	-1.27317	down	--	Cellular Component: intracellular (GO:0005622);; Molecular Function: zinc ion binding (GO:0008270);;	--	Probable salt tolerance-like protein At1g78600 OS=Arabidopsis thaliana GN=At1g78600 PE=1 SV=2	PREDICTED: salt tolerance protein [Vitis vinifera]
c37549.graph_c0	27.9991	12.0925	2.2257e-09	-1.17941	down	--	Molecular Function: DNA binding (GO:0003677);; Molecular Function: chromatin binding (GO:0003682);; Biological Process: response to hormone (GO:0009725);; Biological Process: response to oxygen-containing compound (GO:1901700);;	--	Transcription factor MYB1R1 OS=Solanum tuberosum PE=2 SV=1	hypothetical protein VITISV_028723 [Vitis vinifera]
c41756.graph_c0	19.5172	3.61527	0	-2.39317	down	Amino acid transport and metabolism	Cellular Component: plasma membrane (GO:0005886);; Biological Process: transport (GO:0006810);;	--	Probable peptide/nitrate transporter At3g54450 OS=Arabidopsis thaliana GN=At3g54450 PE=2 SV=1	PREDICTED: probable peptide/nitrate transporter At3g54450 [Vitis vinifera]
c20727.graph_c0	6.92843	2.02757	3.22722e-05	-1.70422	down	--	--	--	--	hypothetical protein PRUPE_ppa011991mg [Prunus persica]
c34247.graph_c0	338.199	150.379	1.77791e-12	-1.14039	down	--	Biological Process: polysaccharide biosynthetic process (GO:0000271);; Cellular Component: plasma membrane (GO:0005886);; Biological Process: water transport (GO:0006833);; Biological Process: pattern specification process (GO:0007389);; Biological Process: regulation of cell size (GO:0008361);; Biological Process: response to salt stress (GO:0009651);; Cellular Component: plant-type vacuole memb…	--	Protein WALLS ARE THIN 1 OS=Arabidopsis thaliana GN=WAT1 PE=1 SV=1	Walls Are Thin 1 [Theobroma cacao]
c13902.graph_c0	6.02636	1.99457	5.7676e-05	-1.53758	down	--	Biological Process: response to light stimulus (GO:0009416);;	--	Zinc finger protein CONSTANS-LIKE 2 OS=Arabidopsis thaliana GN=COL2 PE=1 SV=1	hypothetical protein PRUPE_ppa007007mg [Prunus persica]
c33269.graph_c3	54.452	26.6477	1.5774e-07	-1.00062	down	Secondary metabolites biosynthesis, transport and catabolism	Molecular Function: copper ion binding (GO:0005507);; Cellular Component: cytosol (GO:0005829);; Cellular Component: plant-type cell wall (GO:0009505);; Cellular Component: plasmodesma (GO:0009506);; Biological Process: sterol biosynthetic process (GO:0016126);; Molecular Function: oxidoreductase activity (GO:0016491);; Cellular Component: apoplast (GO:0048046);; Biological Process: plant-type ce…	--	L-ascorbate oxidase homolog OS=Brassica napus GN=Bp10 PE=2 SV=1	hypothetical protein CARUB_v10020107mg [Capsella rubella]
c38936.graph_c3	7.60737	2.47856	3.60674e-10	-1.57652	down	Secondary metabolites biosynthesis, transport and catabolism	Molecular Function: iron ion binding (GO:0005506);; Molecular Function: electron carrier activity (GO:0009055);; Biological Process: abscisic acid metabolic process (GO:0009687);; Biological Process: response to red light (GO:0010114);; Molecular Function: (+)-abscisic acid 8'-hydroxylase activity (GO:0010295);; Molecular Function: oxygen binding (GO:0019825);; Molecular Function: heme binding (G…	K09843|0.0|vvi:100245540|hypothetical protein LOC100245540	Abscisic acid 8&apos;-hydroxylase 4 OS=Arabidopsis thaliana GN=CYP707A4 PE=2 SV=2	PREDICTED: abscisic acid 8&apos;-hydroxylase 4 [Vitis vinifera]
c36790.graph_c0	29.5724	13.4939	3.35811e-09	-1.10132	down	Energy production and conversion	Cellular Component: cell wall (GO:0005618);; Biological Process: response to oxidative stress (GO:0006979);; Molecular Function: UDP-N-acetylmuramate dehydrogenase activity (GO:0008762);; Biological Process: embryo development ending in seed dormancy (GO:0009793);; Biological Process: polar nucleus fusion (GO:0010197);; Molecular Function: reticuline oxidase activity (GO:0050468);; Molecular Func…	--	Reticuline oxidase-like protein OS=Arabidopsis thaliana GN=At4g20830 PE=1 SV=2	PREDICTED: cannabidiolic acid synthase-like 2-like [Solanum lycopersicum]
c22051.graph_c0	1.61599	0.0727556	0.00277721	-3.47581	down	General function prediction only	Molecular Function: lyase activity (GO:0016829);; Molecular Function: flavonol synthase activity (GO:0045431);; Biological Process: flavonol biosynthetic process (GO:0051555);; Biological Process: oxidation-reduction process (GO:0055114);;	--	S-norcoclaurine synthase 1 OS=Coptis japonica GN=NCS1 PE=1 SV=1	hypothetical protein PRUPE_ppa007716mg [Prunus persica]
c28045.graph_c0	11.8592	5.76645	2.43439e-06	-1.00856	down	Defense mechanisms	Molecular Function: ATP binding (GO:0005524);; Biological Process: ATP catabolic process (GO:0006200);; Molecular Function: organic phosphonate transmembrane-transporting ATPase activity (GO:0015416);; Cellular Component: membrane (GO:0016020);;	--	ABC transporter G family member 14 OS=Arabidopsis thaliana GN=ABCG14 PE=2 SV=1	PREDICTED: ABC transporter G family member 14-like [Solanum lycopersicum]
c32070.graph_c0	52.491	24.0349	3.07469e-10	-1.09714	down	Secondary metabolites biosynthesis, transport and catabolism	Molecular Function: iron ion binding (GO:0005506);; Molecular Function: electron carrier activity (GO:0009055);; Molecular Function: flavonoid 3'-monooxygenase activity (GO:0016711);; Molecular Function: heme binding (GO:0020037);; Biological Process: oxidation-reduction process (GO:0055114);;	K09754|0.0|pop:POPTR_685839|CYP98A27	Cytochrome P450 98A2 OS=Glycine max GN=CYP98A2 PE=2 SV=1	cytochrome P450 monooxygenase CS&apos;3H isoform [Salvia miltiorrhiza]
c38856.graph_c0	8.84876	3.87942	2.36528e-05	-1.15256	down	--	--	--	F-box protein At3g07870 OS=Arabidopsis thaliana GN=At3g07870 PE=2 SV=1	PREDICTED: F-box/kelch-repeat protein At3g06240-like [Solanum lycopersicum]
c30645.graph_c0	4.94975	1.93364	0.000336698	-1.30824	down	--	Cellular Component: extracellular region (GO:0005576);; Cellular Component: membrane (GO:0016020);;	--	WAT1-related protein At2g39510 OS=Arabidopsis thaliana GN=At2g39510 PE=2 SV=1	PREDICTED: auxin-induced protein 5NG4-like [Solanum lycopersicum]
c29420.graph_c3	41.1667	15.2409	6.56167e-08	-1.39397	down	Posttranslational modification, protein turnover, chaperones	--	--	Chaperone protein dnaJ 11, chloroplastic OS=Arabidopsis thaliana GN=ATJ11 PE=1 SV=2	DNAJ-like protein [Solanum lycopersicum]
c41768.graph_c0	14.6253	6.47786	7.13254e-05	-1.13714	down	--	--	--	EPIDERMAL PATTERNING FACTOR-like protein 6 OS=Arabidopsis thaliana GN=EPFL6 PE=2 SV=1	hypothetical protein PRUPE_ppa026366mg [Prunus persica]
c21967.graph_c0	50.6444	21.7619	2.27891e-10	-1.18744	down	--	--	--	--	PREDICTED: uncharacterized protein LOC101511560 [Cicer arietinum]
c41033.graph_c0	42.4606	19.847	5.55821e-07	-1.06511	down	--	Biological Process: polysaccharide biosynthetic process (GO:0000271);; Cellular Component: extracellular region (GO:0005576);; Biological Process: tryptophan catabolic process (GO:0006569);; Biological Process: defense response (GO:0006952);; Cellular Component: plant-type cell wall (GO:0009505);; Biological Process: indoleacetic acid biosynthetic process (GO:0009684);; Biological Process: respon…	--	Snakin-2 OS=Solanum tuberosum GN=SN2 PE=1 SV=1	RecName: Full=Snakin-2; Flags: Precursor
c37599.graph_c0	12.9016	4.54205	1.84035e-11	-1.47002	down	Secondary metabolites biosynthesis, transport and catabolism	Molecular Function: iron ion binding (GO:0005506);; Cellular Component: endoplasmic reticulum (GO:0005783);; Molecular Function: electron carrier activity (GO:0009055);; Biological Process: gibberellin biosynthetic process (GO:0009686);; Cellular Component: chloroplast outer membrane (GO:0009707);; Biological Process: gibberellic acid mediated signaling pathway (GO:0009740);; Biological Process: …	K04122|0.0|rcu:RCOM_1592560|ent-kaurene oxidase, putative (EC:1.14.13.78)	Ent-kaurene oxidase, chloroplastic OS=Arabidopsis thaliana GN=KO PE=1 SV=2	PREDICTED: ent-kaurene oxidase, chloroplastic-like [Solanum lycopersicum]
c33804.graph_c0	46.6289	18.1843	4.43023e-12	-1.32626	down	--	Molecular Function: binding (GO:0005488);; Cellular Component: plasma membrane (GO:0005886);; Biological Process: cellular aromatic compound metabolic process (GO:0006725);; Biological Process: response to oxidative stress (GO:0006979);; Biological Process: cellular nitrogen compound metabolic process (GO:0034641);; Biological Process: primary metabolic process (GO:0044238);; Biological Process: …	--	Zinc finger CCCH domain-containing protein 20 OS=Arabidopsis thaliana GN=At2g19810 PE=2 SV=1	PREDICTED: zinc finger CCCH domain-containing protein 49-like [Solanum lycopersicum]
c32944.graph_c0	2.64783	0.190738	5.42575e-09	-3.45733	down	--	Molecular Function: nucleoside transmembrane transporter activity (GO:0005337);; Cellular Component: membrane (GO:0016020);;	K03323|0.0|vvi:100243980|hypothetical protein LOC100243980	Equilibrative nucleotide transporter 8 OS=Arabidopsis thaliana GN=ETN8 PE=2 SV=1	PREDICTED: equilibrative nucleotide transporter 8-like [Solanum lycopersicum]
c37653.graph_c0	12.2545	5.53452	1.56359e-07	-1.11431	down	Defense mechanisms	Molecular Function: ATP binding (GO:0005524);; Biological Process: ATP catabolic process (GO:0006200);; Biological Process: transport (GO:0006810);; Biological Process: stomatal complex morphogenesis (GO:0010103);; Molecular Function: organic phosphonate transmembrane-transporting ATPase activity (GO:0015416);; Cellular Component: integral component of membrane (GO:0016021);;	--	ABC transporter G family member 5 OS=Arabidopsis thaliana GN=ABCG5 PE=2 SV=1	PREDICTED: ABC transporter G family member 5 isoform 1 [Vitis vinifera]
c35186.graph_c0	19.5237	3.88116	0	-2.28268	down	--	Biological Process: transport (GO:0006810);; Cellular Component: membrane (GO:0016020);;	--	Bidirectional sugar transporter SWEET17 OS=Arabidopsis thaliana GN=SWEET17 PE=2 SV=2	conserved hypothetical protein [Ricinus communis]
c37462.graph_c3	37.3089	17.2707	5.57437e-10	-1.08146	down	General function prediction only	Cellular Component: cytoplasm (GO:0005737);; Biological Process: gravitropism (GO:0009630);; Biological Process: flower development (GO:0009908);; Cellular Component: basal plasma membrane (GO:0009925);; Biological Process: auxin polar transport (GO:0009926);; Biological Process: xylem and phloem pattern formation (GO:0010051);; Biological Process: inflorescence development (GO:0010229);; Biologi…	K13947|0.0|vvi:100249181|hypothetical protein LOC100249181	Auxin efflux carrier component 1 OS=Arabidopsis thaliana GN=PIN1 PE=1 SV=1	hypothetical protein PRUPE_ppa002944mg [Prunus persica]
c34222.graph_c0	46.0741	14.5466	0	-1.63216	down	--	Cellular Component: cytoplasm (GO:0005737);; Cellular Component: membrane (GO:0016020);; Biological Process: glucosinolate biosynthetic process (GO:0019761);;	--	WAT1-related protein At2g37460 OS=Arabidopsis thaliana GN=At2g37460 PE=2 SV=1	PREDICTED: auxin-induced protein 5NG4-like [Solanum lycopersicum]
c29940.graph_c0	871.376	298.399	0	-1.51715	down	--	--	--	Organ-specific protein S2 OS=Pisum sativum PE=2 SV=1	PREDICTED: organ-specific protein S2-like [Solanum lycopersicum]
c32950.graph_c1	39.0417	18.7265	1.01446e-05	-1.02703	down	Cytoskeleton	Molecular Function: GTPase activity (GO:0003924);; Molecular Function: structural constituent of cytoskeleton (GO:0005200);; Molecular Function: GTP binding (GO:0005525);; Cellular Component: cytoplasm (GO:0005737);; Cellular Component: microtubule (GO:0005874);; Biological Process: GTP catabolic process (GO:0006184);; Biological Process: microtubule-based process (GO:0007017);; Biological Proces…	--	Tubulin beta-3 chain OS=Triticum aestivum GN=TUBB3 PE=2 SV=1	predicted protein [Hordeum vulgare subsp. vulgare]
c35089.graph_c0	23.17	10.1568	4.62146e-09	-1.15805	down	General function prediction only	Molecular Function: retinyl-palmitate esterase activity (GO:0050253);; Molecular Function: methyl indole-3-acetate esterase activity (GO:0080030);; Molecular Function: methyl salicylate esterase activity (GO:0080031);; Molecular Function: methyl jasmonate esterase activity (GO:0080032);;	--	Acyl-protein thioesterase 1 homolog 1 OS=Dictyostelium discoideum GN=DDB_G0282005 PE=2 SV=1	PREDICTED: acyl-protein thioesterase 2 [Vitis vinifera]
c18210.graph_c0	4.73819	1.95756	0.000743661	-1.22996	down	--	Biological Process: carbohydrate metabolic process (GO:0005975);; Biological Process: anthocyanin-containing compound biosynthetic process (GO:0009718);; Molecular Function: UDP-glucosyltransferase activity (GO:0035251);; Biological Process: pigmentation (GO:0043473);; Biological Process: cellular metabolic process (GO:0044237);;	--	Anthocyanidin 3-O-glucoside 5-O-glucosyltransferase OS=Verbena hybrida GN=HGT8 PE=2 SV=1	glucosyltransferase [Nicotiana tabacum]
c19963.graph_c0	2.02167	0.321247	7.30823e-07	-2.50524	down	Inorganic ion transport and metabolism	Molecular Function: iron ion transmembrane transporter activity (GO:0005381);; Molecular Function: manganese ion transmembrane transporter activity (GO:0005384);; Cellular Component: plasma membrane (GO:0005886);; Biological Process: cellular metal ion homeostasis (GO:0006875);; Cellular Component: chloroplast (GO:0009507);; Molecular Function: cadmium ion transmembrane transporter activity (GO:0…	K03322|0.0|vvi:100256746|hypothetical protein LOC100256746	Metal transporter Nramp1 OS=Arabidopsis thaliana GN=NRAMP1 PE=1 SV=1	PREDICTED: LOW QUALITY PROTEIN: metal transporter Nramp6-like [Solanum lycopersicum]
c32319.graph_c0	2.27408	0.796938	0.00679903	-1.44463	down	--	Biological Process: MAPK cascade (GO:0000165);; Molecular Function: protein serine/threonine kinase activity (GO:0004674);; Molecular Function: protein serine/threonine/tyrosine kinase activity (GO:0004712);; Molecular Function: signal transducer activity (GO:0004871);; Cellular Component: nucleus (GO:0005634);; Biological Process: protein phosphorylation (GO:0006468);;	--	Serine/threonine-protein kinase EDR1 OS=Arabidopsis thaliana GN=EDR1 PE=1 SV=1	map3k delta-1 protein kinase, putative [Ricinus communis]
c29037.graph_c0	14.25	6.29332	9.0499e-07	-1.14487	down	--	--	--	F-box/kelch-repeat protein At3g06240 OS=Arabidopsis thaliana GN=At3g06240 PE=2 SV=1	PREDICTED: F-box/kelch-repeat protein At3g06240-like [Solanum lycopersicum]
c25315.graph_c0	24.1565	10.1206	3.18616e-11	-1.224	down	--	Molecular Function: sequence-specific DNA binding transcription factor activity (GO:0003700);; Cellular Component: nucleus (GO:0005634);; Biological Process: regulation of transcription, DNA-templated (GO:0006355);; Molecular Function: sequence-specific DNA binding (GO:0043565);;	--	Homeobox protein knotted-1-like LET6 OS=Solanum lycopersicum GN=LET6 PE=2 SV=1	invaginata [Antirrhinum majus]
c30667.graph_c0	43.2413	20.5756	4.8451e-06	-1.03876	down	--	--	--	A-agglutinin anchorage subunit OS=Saccharomyces cerevisiae (strain ATCC 204508 / S288c) GN=AGA1 PE=1 SV=1	hypothetical protein CLUG_05252 [Clavispora lusitaniae ATCC 42720]
c34779.graph_c0	52.9532	25.8615	1.70069e-07	-1.00349	down	--	--	--	--	hypothetical protein [Solanum tuberosum]
c20975.graph_c0	14.7388	4.12536	0	-1.8	down	Inorganic ion transport and metabolism	Molecular Function: transporter activity (GO:0005215);; Biological Process: transport (GO:0006810);; Cellular Component: membrane (GO:0016020);;	--	Metal transporter Nramp1 OS=Arabidopsis thaliana GN=NRAMP1 PE=1 SV=1	PREDICTED: metal transporter Nramp5 [Vitis vinifera]
c22803.graph_c0	3.41088	0.819017	5.47429e-05	-1.96071	down	--	Molecular Function: DNA binding (GO:0003677);; Molecular Function: sequence-specific DNA binding transcription factor activity (GO:0003700);; Molecular Function: protein binding (GO:0005515);; Cellular Component: nucleus (GO:0005634);; Cellular Component: mitochondrion (GO:0005739);; Biological Process: cell death (GO:0008219);; Biological Process: chloroplast organization (GO:0009658);; Cellular…	--	Cyclic dof factor 1 OS=Arabidopsis thaliana GN=CDF1 PE=1 SV=2	unnamed protein product [Vitis vinifera]
c41140.graph_c0	24.8754	7.79093	0	-1.64104	down	--	--	--	Copper transport protein CCH OS=Arabidopsis thaliana GN=CCH PE=1 SV=1	predicted protein [Populus trichocarpa]
c30167.graph_c0	22.7867	7.30866	1.29452e-13	-1.60352	down	--	--	--	--	PREDICTED: uncharacterized protein LOC100854649 [Vitis vinifera]
c22556.graph_c0	4.41768	0.397788	1.93154e-06	-3.14222	down	--	Cellular Component: cytoplasm (GO:0005737);; Molecular Function: electron carrier activity (GO:0009055);; Molecular Function: protein disulfide oxidoreductase activity (GO:0015035);; Biological Process: cell redox homeostasis (GO:0045454);; Biological Process: anther development (GO:0048653);;	--	Glutaredoxin-C6 OS=Arabidopsis thaliana GN=GRXC6 PE=2 SV=2	PREDICTED: glutaredoxin-C6 [Vitis vinifera]
c33610.graph_c0	4.19501	0.773902	0.0024632	-2.24807	down	--	Biological Process: response to auxin (GO:0009733);;	K14488|1e-53|vvi:100253355|similar to auxin-responsive family protein	Indole-3-acetic acid-induced protein ARG7 OS=Vigna radiata var. radiata GN=ARG7 PE=2 SV=1	unnamed protein product [Vitis vinifera]
c37491.graph_c0	6.85045	2.95489	1.22758e-05	-1.17591	down	Amino acid transport and metabolism	Molecular Function: transporter activity (GO:0005215);; Cellular Component: plasma membrane (GO:0005886);; Biological Process: oligopeptide transport (GO:0006857);; Biological Process: response to nematode (GO:0009624);; Biological Process: xylem development (GO:0010089);; Cellular Component: integral component of membrane (GO:0016021);; Biological Process: cell wall macromolecule metabolic proce…	--	Probable peptide/nitrate transporter At1g33440 OS=Arabidopsis thaliana GN=At1g33440 PE=2 SV=1	predicted protein [Populus trichocarpa]
c38694.graph_c0	12.3413	5.54383	2.4174e-05	-1.11851	down	--	Molecular Function: N-acetyltransferase activity (GO:0008080);;	--	--	PREDICTED: uncharacterized protein LOC100244789 [Vitis vinifera]
c37994.graph_c0	6.65587	2.71459	1.3853e-05	-1.25383	down	Secondary metabolites biosynthesis, transport and catabolism	Molecular Function: monooxygenase activity (GO:0004497);; Molecular Function: iron ion binding (GO:0005506);; Molecular Function: electron carrier activity (GO:0009055);; Molecular Function: oxidoreductase activity, acting on paired donors, with incorporation or reduction of molecular oxygen (GO:0016705);; Molecular Function: heme binding (GO:0020037);; Biological Process: oxidation-reduction pro…	--	Cytochrome P450 704C1 OS=Pinus taeda GN=CYP704C1 PE=2 SV=1	cytochrome P450 monooxygenase [Petunia x hybrida]
c35348.graph_c0	16.5757	7.20182	4.37958e-06	-1.16667	down	--	--	--	--	PREDICTED: uncharacterized protein LOC101260148 [Solanum lycopersicum]
c38181.graph_c0	21.8738	8.83962	9.56027e-10	-1.27372	down	--	--	--	--	Uncharacterized protein TCM_017094 [Theobroma cacao]
c38180.graph_c0	2.11049	0.817989	0.0053121	-1.31156	down	--	Cellular Component: nucleus (GO:0005634);; Cellular Component: cytoplasm (GO:0005737);; Biological Process: plant-type cell wall modification (GO:0009827);; Biological Process: pollen tube growth (GO:0009860);; Biological Process: actin cytoskeleton organization (GO:0030036);; Biological Process: actin filament-based movement (GO:0030048);; Cellular Component: pollen tube tip (GO:0090404);;	--	Vacuolar protein 8 OS=Candida albicans (strain SC5314 / ATCC MYA-2876) GN=VAC8 PE=3 SV=3	hypothetical protein M569_02236 [Genlisea aurea]
c23743.graph_c1	4.06415	0	2.60748e-11	-5.51918	down	--	Molecular Function: methyltransferase activity (GO:0008168);;	--	3&apos;-hydroxy-N-methyl-(S)-coclaurine 4&apos;-O-methyltransferase OS=Coptis japonica PE=1 SV=1	O-methyltransferase [Medicago truncatula]
c21120.graph_c0	230.719	108.877	2.08919e-10	-1.05453	down	--	Molecular Function: calmodulin-dependent protein kinase activity (GO:0004683);; Molecular Function: protein binding (GO:0005515);; Molecular Function: ATP binding (GO:0005524);; Cellular Component: plasma membrane (GO:0005886);; Biological Process: protein phosphorylation (GO:0006468);; Biological Process: multicellular organismal development (GO:0007275);; Biological Process: response to water d…	--	CBL-interacting serine/threonine-protein kinase 6 OS=Arabidopsis thaliana GN=CIPK6 PE=1 SV=1	hypothetical protein PRUPE_ppa006023mg [Prunus persica]
c13629.graph_c0	5.92999	2.84473	0.000509573	-1.0236	down	--	Cellular Component: plasma membrane (GO:0005886);; Cellular Component: plasmodesma (GO:0009506);; Molecular Function: transmembrane transporter activity (GO:0022857);; Biological Process: transmembrane transport (GO:0055085);;	--	Nucleobase-ascorbate transporter 7 OS=Arabidopsis thaliana GN=NAT7 PE=2 SV=2	Nucleobase-ascorbate transporter 7 [Theobroma cacao]
c41044.graph_c0	26.2087	8.46169	1.53211e-13	-1.59419	down	--	--	--	Anther-specific protein LAT52 OS=Solanum lycopersicum GN=LAT52 PE=2 SV=1	PREDICTED: anther-specific protein LAT52-like [Solanum lycopersicum]
c37967.graph_c0	9.94842	4.16763	8.92571e-08	-1.22061	down	Carbohydrate transport and metabolism	Molecular Function: sugar:hydrogen symporter activity (GO:0005351);; Biological Process: carbohydrate transport (GO:0008643);; Cellular Component: integral component of membrane (GO:0016021);; Biological Process: phosphate ion homeostasis (GO:0055062);; Biological Process: transmembrane transport (GO:0055085);;	K13783|0.0|rcu:RCOM_1500400|Glycerol-3-phosphate transporter, putative	Putative glycerol-3-phosphate transporter 1 OS=Arabidopsis thaliana GN=At3g47420 PE=2 SV=1	PREDICTED: putative glycerol-3-phosphate transporter 1-like [Solanum lycopersicum]
c34547.graph_c0	7.69803	3.70113	0.000824231	-1.01995	down	--	Cellular Component: intracellular membrane-bounded organelle (GO:0043231);; Cellular Component: cytoplasmic part (GO:0044444);;	--	Myosin-4 OS=Oryctolagus cuniculus GN=MYH4 PE=2 SV=1	predicted protein [Populus trichocarpa]
c39427.graph_c0	79.4419	23.9978	0	-1.69647	down	--	Cellular Component: membrane (GO:0016020);;	--	WAT1-related protein At5g07050 OS=Arabidopsis thaliana GN=At5g07050 PE=2 SV=1	nodulin-like protein [Plantago major]
c39399.graph_c0	6.76976	3.12224	0.00203874	-1.0765	down	--	Cellular Component: extracellular region (GO:0005576);; Cellular Component: membrane (GO:0016020);;	--	WAT1-related protein At2g39510 OS=Arabidopsis thaliana GN=At2g39510 PE=2 SV=1	PREDICTED: auxin-induced protein 5NG4-like [Solanum lycopersicum]
c41581.graph_c0	17.6536	6.10838	5.88799e-07	-1.48542	down	--	--	--	Snakin-2 OS=Solanum tuberosum GN=SN2 PE=1 SV=1	PREDICTED: gibberellin-regulated protein 14-like [Solanum lycopersicum]
c36263.graph_c0	657.696	247.45	0	-1.38131	down	General function prediction only	Molecular Function: zinc ion binding (GO:0008270);; Molecular Function: mannitol dehydrogenase activity (GO:0046029);; Biological Process: oxidation-reduction process (GO:0055114);;	--	8-hydroxygeraniol dehydrogenase OS=Catharanthus roseus GN=10HGO PE=1 SV=1	sinapyl alcohol dehydrogenase 2 [Nicotiana tabacum]
c29571.graph_c0	49.8841	18.7484	7.60125e-12	-1.37829	down	--	--	--	--	PREDICTED: uncharacterized protein LOC101245955 [Solanum lycopersicum]
c35845.graph_c1	14.9699	7.02123	0.00147957	-1.05368	down	--	--	--	--	hypothetical protein M569_03091 [Genlisea aurea]
c32768.graph_c0	1.80038	0.577199	0.000273645	-1.57563	down	--	Molecular Function: magnesium ion binding (GO:0000287);; Cellular Component: plastid (GO:0009536);; Biological Process: gibberellin metabolic process (GO:0009685);; Molecular Function: terpene synthase activity (GO:0010333);; Biological Process: diterpenoid biosynthetic process (GO:0016102);; Molecular Function: intramolecular lyase activity (GO:0016872);;	K04120|0.0|pop:POPTR_798561|CPS1	Ent-copalyl diphosphate synthase, chloroplastic OS=Pisum sativum PE=2 SV=1	putative copalyl diphosphate synthase [Scoparia dulcis]
c42130.graph_c0	14.213	3.555	1.0052e-12	-1.94831	down	--	Molecular Function: sequence-specific DNA binding transcription factor activity (GO:0003700);; Biological Process: regulation of transcription, DNA-templated (GO:0006355);; Molecular Function: sequence-specific DNA binding (GO:0043565);;	--	Ocs element-binding factor 1 OS=Zea mays GN=OBF1 PE=2 SV=2	Basic leucine-zipper 42 [Theobroma cacao]
c41393.graph_c0	35.1819	17.2152	1.82417e-07	-1.00074	down	--	Cellular Component: plasma membrane (GO:0005886);; Cellular Component: plastid (GO:0009536);;	--	--	PREDICTED: uncharacterized protein LOC101258701 [Solanum lycopersicum]
c37791.graph_c0	30.4431	8.38247	0	-1.8287	down	Energy production and conversion	Molecular Function: phosphoenolpyruvate carboxykinase (ATP) activity (GO:0004612);; Molecular Function: ATP binding (GO:0005524);; Biological Process: gluconeogenesis (GO:0006094);; Molecular Function: kinase activity (GO:0016301);; Biological Process: phosphorylation (GO:0016310);;	K01610|0.0|osa:4332293|Os03g0255500	Phosphoenolpyruvate carboxykinase [ATP] OS=Arabidopsis thaliana GN=PCKA PE=1 SV=1	PREDICTED: phosphoenolpyruvate carboxykinase [ATP]-like [Cicer arietinum]
c26789.graph_c1	12.8405	3.18433	0.000561224	-1.90563	down	Carbohydrate transport and metabolism	Molecular Function: hydrolase activity, hydrolyzing O-glycosyl compounds (GO:0004553);; Biological Process: carbohydrate metabolic process (GO:0005975);;	--	--	unnamed protein product [Vitis vinifera]
c32276.graph_c0	6.78902	1.85285	1.4134e-10	-1.82275	down	--	Molecular Function: DNA binding (GO:0003677);; Cellular Component: nucleus (GO:0005634);; Biological Process: response to xenobiotic stimulus (GO:0009410);; Biological Process: endoplasmic reticulum unfolded protein response (GO:0030968);; Biological Process: positive regulation of transcription, DNA-templated (GO:0045893);;	--	Transcription factor RF2a OS=Oryza sativa subsp. japonica GN=RF2a PE=1 SV=1	PREDICTED: transcription factor VIP1-like [Fragaria vesca subsp. vesca]
c34037.graph_c0	9.95354	4.07686	7.51839e-07	-1.25073	down	--	Biological Process: metabolic process (GO:0008152);; Molecular Function: transferase activity, transferring hexosyl groups (GO:0016758);;	--	UDP-glucose flavonoid 3-O-glucosyltransferase 6 OS=Fragaria ananassa GN=GT6 PE=1 SV=1	glucosyltransferase homolog [Antirrhinum majus]
c35057.graph_c0	17.1772	5.77242	9.9265e-13	-1.53695	down	--	Cellular Component: membrane (GO:0016020);;	--	WAT1-related protein At1g21890 OS=Arabidopsis thaliana GN=At1g21890 PE=2 SV=1	unnamed protein product [Vitis vinifera]
c26643.graph_c0	20.9276	8.09229	3.96784e-08	-1.33359	down	Posttranslational modification, protein turnover, chaperones	Cellular Component: nucleus (GO:0005634);; Biological Process: chlorophyll catabolic process (GO:0015996);;	--	Chaperone protein dnaJ 20, chloroplastic OS=Arabidopsis thaliana GN=ATJ20 PE=2 SV=2	predicted protein [Populus trichocarpa]
c33652.graph_c0	27.16	10.8694	1.3748e-11	-1.28923	down	--	Biological Process: circadian rhythm (GO:0007623);; Biological Process: response to abiotic stimulus (GO:0009628);;	--	--	uncharacterized protein [Arabidopsis thaliana]
c14994.graph_c0	153.595	69.845	2.44649e-09	-1.1063	down	--	Biological Process: response to stress (GO:0006950);; Biological Process: single-organism cellular process (GO:0044763);; Biological Process: single-organism transport (GO:0044765);; Biological Process: regulation of biological quality (GO:0065008);;	--	Metallothionein-like protein 1 OS=Prunus avium GN=MT1 PE=3 SV=1	PREDICTED: metallothionein-like protein type 3-like [Cicer arietinum]
c14071.graph_c0	8.18716	3.38655	0.0012509	-1.22724	down	--	Molecular Function: signal transducer activity (GO:0004871);; Cellular Component: extracellular region (GO:0005576);; Biological Process: cell communication (GO:0007154);; Biological Process: single organism signaling (GO:0044700);;	--	Protein RALF-like 32 OS=Arabidopsis thaliana GN=RALFL32 PE=2 SV=1	unknown [Lotus japonicus]
c32464.graph_c0	20.6612	9.59152	0.00855579	-1.06483	down	Amino acid transport and metabolism	Molecular Function: methylenetetrahydrofolate reductase (NAD(P)H) activity (GO:0004489);; Biological Process: methionine metabolic process (GO:0006555);; Biological Process: tetrahydrofolate interconversion (GO:0035999);; Biological Process: oxidation-reduction process (GO:0055114);;	K00297|1e-53|pop:POPTR_654300|MTHFR1	Methylenetetrahydrofolate reductase 1 OS=Zea mays PE=1 SV=1	methylenetetrahydrofolate reductase [Populus trichocarpa]
c29823.graph_c0	16.2682	7.08463	1.33098e-06	-1.16432	down	General function prediction only	Molecular Function: nucleotide binding (GO:0000166);; Molecular Function: nucleic acid binding (GO:0003676);; Cellular Component: nucleus (GO:0005634);; Biological Process: response to water deprivation (GO:0009414);; Biological Process: response to salt stress (GO:0009651);; Biological Process: response to abscisic acid (GO:0009737);; Biological Process: regulation of seed germination (GO:001002…	--	RNA-binding protein 38 OS=Mus musculus GN=Rbm38 PE=1 SV=2	RNA-binding family protein isoform 2 [Theobroma cacao]
c34155.graph_c0	12.8059	5.07364	4.41619e-06	-1.29541	down	--	--	--	--	PREDICTED: uncharacterized protein LOC101250999 [Solanum lycopersicum]
c35215.graph_c0	46.8933	22.7664	1.99055e-07	-1.01184	down	Posttranslational modification, protein turnover, chaperones	Biological Process: response to stress (GO:0006950);; Cellular Component: intracellular membrane-bounded organelle (GO:0043231);;	--	Chaperone protein dnaJ 8, chloroplastic OS=Arabidopsis thaliana GN=ATJ8 PE=2 SV=1	putative DnaJ protein [Camellia sinensis]
c14459.graph_c0	30.1374	10.8292	2.1259e-11	-1.44117	down	--	Cellular Component: endoplasmic reticulum (GO:0005783);; Biological Process: phosphatidylinositol biosynthetic process (GO:0006661);; Cellular Component: chloroplast (GO:0009507);; Biological Process: vesicle-mediated transport (GO:0016192);; Molecular Function: oxidoreductase activity (GO:0016491);; Molecular Function: metal ion binding (GO:0046872);;	--	PRA1 family protein F3 OS=Arabidopsis thaliana GN=PRA1F3 PE=1 SV=1	hypothetical protein M569_11731, partial [Genlisea aurea]
c31399.graph_c0	14.5943	6.75844	0.000152855	-1.07419	down	General function prediction only	Cellular Component: cytoplasm (GO:0005737);; Molecular Function: O-methyltransferase activity (GO:0008171);; Biological Process: anthocyanin-containing compound biosynthetic process (GO:0009718);; Biological Process: methylation (GO:0032259);; Biological Process: cyanidin 3-O-glucoside biosynthetic process (GO:0033485);; Biological Process: delphinidin 3-O-glucoside biosynthetic process (GO:00334…	K00588|1e-109|vvi:100250567|hypothetical protein LOC100250567	Flavonoid 3&apos;,5&apos;-methyltransferase OS=Vitis vinifera GN=FAOMT PE=1 SV=1	caffeoyl-CoA O-methyltransferase [Plantago major]
c14971.graph_c0	7.37713	2.82851	2.52113e-07	-1.34394	down	Secondary metabolites biosynthesis, transport and catabolism	Molecular Function: fatty-acyl-CoA reductase (alcohol-forming) activity (GO:0080019);;	--	Alcohol-forming fatty acyl-CoA reductase OS=Simmondsia chinensis PE=1 SV=1	PREDICTED: fatty acyl-CoA reductase 3-like [Solanum lycopersicum]
c29532.graph_c0	45.6036	21.6124	0.00287864	-1.03827	down	Translation, ribosomal structure and biogenesis	Molecular Function: structural constituent of ribosome (GO:0003735);; Cellular Component: ribosome (GO:0005840);; Biological Process: translation (GO:0006412);;	--	60S ribosomal protein L12 OS=Prunus armeniaca GN=RPL12 PE=2 SV=1	unknown [Lotus japonicus]
c22366.graph_c0	3.74876	0.778975	0.00051476	-2.12564	down	--	Biological Process: fatty acid beta-oxidation (GO:0006635);;	--	--	PREDICTED: uncharacterized protein LOC101246275 [Solanum lycopersicum]
c32607.graph_c1	15.8662	7.64362	1.71513e-06	-1.02184	down	Cell wall/membrane/envelope biogenesis	Molecular Function: zinc ion binding (GO:0008270);; Cellular Component: chloroplast (GO:0009507);; Biological Process: secondary cell wall biogenesis (GO:0009834);; Biological Process: xylem development (GO:0010089);; Biological Process: vegetative to reproductive phase transition of meristem (GO:0010228);; Biological Process: rhamnogalacturonan I side chain metabolic process (GO:0010400);; Biolo…	K10999|0.0|vvi:100248512|hypothetical protein LOC100248512	Cellulose synthase A catalytic subunit 7 [UDP-forming] OS=Arabidopsis thaliana GN=CESA7 PE=1 SV=1	cellulose synthase A1 [Neolamarckia cadamba]
c42343.graph_c0	4.80801	1.74749	0.00037777	-1.40618	down	General function prediction only	Molecular Function: oxidoreductase activity, acting on paired donors, with incorporation or reduction of molecular oxygen, 2-oxoglutarate as one donor, and incorporation of one atom each of oxygen into both donors (GO:0016706);;	--	1-aminocyclopropane-1-carboxylate oxidase homolog 7 OS=Arabidopsis thaliana GN=At1g04380 PE=1 SV=1	PREDICTED: hyoscyamine 6-dioxygenase-like [Solanum lycopersicum]
c36298.graph_c0	11.7906	4.9603	6.40877e-06	-1.21142	down	General function prediction only	Molecular Function: iron ion binding (GO:0005506);; Cellular Component: cytoplasmic membrane-bounded vesicle (GO:0016023);; Biological Process: secretion by cell (GO:0032940);; Biological Process: gibberellin catabolic process (GO:0045487);; Molecular Function: C-19 gibberellin 2-beta-dioxygenase activity (GO:0052634);; Biological Process: oxidation-reduction process (GO:0055114);;	--	Gibberellin 2-beta-dioxygenase 1 OS=Pisum sativum GN=GA2OX1 PE=1 SV=1	gibberellin 2-oxidase [Populus trichocarpa]
c29229.graph_c0	3.01005	0.822462	3.4239e-05	-1.79482	down	Secondary metabolites biosynthesis, transport and catabolism	Molecular Function: iron ion binding (GO:0005506);; Molecular Function: electron carrier activity (GO:0009055);; Molecular Function: heme binding (GO:0020037);; Molecular Function: flavonoid 3',5'-hydroxylase activity (GO:0033772);; Biological Process: oxidation-reduction process (GO:0055114);;	--	Cytochrome P450 71A1 OS=Persea americana GN=CYP71A1 PE=1 SV=2	cytochrome P450 CYP736A54 [Bupleurum chinense]
c14530.graph_c0	122.017	47.866	2.22045e-16	-1.32072	down	--	Biological Process: amino acid transmembrane transport (GO:0003333);; Cellular Component: integral component of plasma membrane (GO:0005887);; Biological Process: protein targeting to membrane (GO:0006612);; Biological Process: water transport (GO:0006833);; Biological Process: nucleotide transport (GO:0006862);; Biological Process: ER to Golgi vesicle-mediated transport (GO:0006888);; Biological…	--	Amino acid permease 2 OS=Arabidopsis thaliana GN=AAP2 PE=1 SV=1	PREDICTED: amino acid permease 2 isoform 1 [Vitis vinifera]
c37946.graph_c0	9.49353	4.25807	2.44606e-05	-1.12064	down	--	Molecular Function: signal transducer activity (GO:0004871);; Cellular Component: cytoplasm (GO:0005737);; Cellular Component: heterotrimeric G-protein complex (GO:0005834);; Biological Process: signal transduction (GO:0007165);; Biological Process: cellular process involved in reproduction (GO:0048610);; Biological Process: pollen tube development (GO:0048868);;	--	WD repeat-containing protein 44 OS=Xenopus laevis GN=wdr44 PE=2 SV=1	PREDICTED: uncharacterized protein LOC101256031 [Solanum lycopersicum]
c33079.graph_c0	14.4423	6.7171	0.000223574	-1.06773	down	Carbohydrate transport and metabolism	Biological Process: water transport (GO:0006833);; Cellular Component: plant-type vacuole membrane (GO:0009705);; Biological Process: cytokinin-activated signaling pathway (GO:0009736);; Molecular Function: water channel activity (GO:0015250);; Cellular Component: integral component of membrane (GO:0016021);; Cellular Component: central vacuole (GO:0042807);; Biological Process: transmembrane tra…	--	Aquaporin TIP4-1 OS=Arabidopsis thaliana GN=TIP4-1 PE=2 SV=1	aquaglyceroporin [Nicotiana tabacum]
c23743.graph_c0	3.28313	0.208679	7.94323e-05	-3.38582	down	--	Molecular Function: O-methyltransferase activity (GO:0008171);;	--	(RS)-norcoclaurine 6-O-methyltransferase OS=Coptis japonica PE=1 SV=1	o-methyltransferase, putative [Ricinus communis]
c41825.graph_c0	16.7955	6.26042	5.94289e-08	-1.3846	down	--	Molecular Function: metal ion binding (GO:0046872);;	--	E3 ubiquitin-protein ligase RING1 OS=Gossypium hirsutum GN=RING1 PE=2 SV=1	PREDICTED: E3 ubiquitin-protein ligase Praja-1-like isoform 1 [Solanum lycopersicum]
c35032.graph_c0	24.887	11.7796	6.17456e-07	-1.04731	down	Amino acid transport and metabolism	Cellular Component: plasma membrane (GO:0005886);; Molecular Function: homocysteine S-methyltransferase activity (GO:0008898);; Biological Process: methionine biosynthetic process (GO:0009086);; Biological Process: methylation (GO:0032259);; Biological Process: S-methylmethionine cycle (GO:0033528);;	K00547|0.0|rcu:RCOM_0911480|5-methyltetrahydrofolate:homocysteine methyltransferase, putative (EC:2.1.1.10)	Homocysteine S-methyltransferase 2 OS=Arabidopsis thaliana GN=HMT-2 PE=1 SV=1	PREDICTED: homocysteine S-methyltransferase 3-like [Solanum lycopersicum]
c19961.graph_c1	12.6398	5.35235	1.88573e-05	-1.20123	down	--	Cellular Component: cytoplasmic membrane-bounded vesicle (GO:0016023);; Molecular Function: hydrolase activity (GO:0016787);;	--	GDSL esterase/lipase At1g09390 OS=Arabidopsis thaliana GN=At1g09390 PE=2 SV=1	PREDICTED: GDSL esterase/lipase At1g09390-like [Cucumis sativus]
c20042.graph_c0	19.7799	8.26004	2.38448e-05	-1.22036	down	--	Molecular Function: protein kinase activity (GO:0004672);; Molecular Function: ATP binding (GO:0005524);; Biological Process: protein phosphorylation (GO:0006468);; Molecular Function: ligase activity (GO:0016874);; Molecular Function: 2-alkenal reductase [NAD(P)] activity (GO:0032440);; Biological Process: oxidation-reduction process (GO:0055114);;	K10143|3e-71|rcu:RCOM_0073590|ubiquitin ligase protein cop1, putative (EC:1.3.1.74)	Protein SPA1-RELATED 3 OS=Arabidopsis thaliana GN=SPA3 PE=1 SV=1	PREDICTED: protein SPA1-RELATED 3-like [Solanum lycopersicum]
c25454.graph_c1	2.02822	0.378789	3.04343e-07	-2.30808	down	--	Molecular Function: kinase activity (GO:0016301);; Biological Process: phosphorylation (GO:0016310);;	--	G-type lectin S-receptor-like serine/threonine-protein kinase At1g11330 OS=Arabidopsis thaliana GN=At1g11330 PE=1 SV=3	PREDICTED: G-type lectin S-receptor-like serine/threonine-protein kinase At1g11330-like [Solanum lycopersicum]
c27862.graph_c0	37.0225	17.6345	3.8547e-08	-1.03953	down	--	Molecular Function: zinc ion transmembrane transporter activity (GO:0005385);; Biological Process: iron ion transport (GO:0006826);; Biological Process: water transport (GO:0006833);; Molecular Function: zinc ion binding (GO:0008270);; Biological Process: response to zinc ion (GO:0010043);; Biological Process: cellular response to iron ion starvation (GO:0010106);; Cellular Component: integral co…	K14709|1e-170|pop:POPTR_805363|ZIP transporter	Zinc transporter 1 OS=Arabidopsis thaliana GN=ZIP1 PE=2 SV=1	Zinc transporter 1 precursor [Theobroma cacao]
c41462.graph_c0	28.666	9.64883	6.42819e-14	-1.53593	down	--	--	--	--	PREDICTED: uncharacterized protein LOC101226152 [Cucumis sativus]
c39632.graph_c0	42.2576	15.9467	1.44329e-15	-1.37526	down	Inorganic ion transport and metabolism	Molecular Function: nucleotide binding (GO:0000166);; Molecular Function: zinc ion transmembrane transporter activity (GO:0005385);; Molecular Function: protein binding (GO:0005515);; Cellular Component: plasma membrane (GO:0005886);; Biological Process: zinc ion transport (GO:0006829);; Cellular Component: plasmodesma (GO:0009506);; Biological Process: response to zinc ion (GO:0010043);; Molecul…	K01534|0.0|ath:AT2G19110|HMA4	Putative cadmium/zinc-transporting ATPase HMA4 OS=Arabidopsis thaliana GN=HMA4 PE=1 SV=2	PREDICTED: cadmium/zinc-transporting ATPase HMA2-like [Solanum lycopersicum]
c26526.graph_c0	59.3845	24.4431	7.49401e-14	-1.25084	down	--	Biological Process: cell fate specification (GO:0001708);; Molecular Function: sequence-specific DNA binding transcription factor activity (GO:0003700);; Cellular Component: nucleus (GO:0005634);; Biological Process: regulation of transcription, DNA-templated (GO:0006355);; Biological Process: determination of bilateral symmetry (GO:0009855);; Biological Process: organ morphogenesis (GO:0009887);…	--	Homeotic protein knotted-1 OS=Solanum lycopersicum GN=KN1 PE=2 SV=1	KNOTTED-like from [Theobroma cacao]
c40372.graph_c0	211.427	85.1361	1.70974e-14	-1.2824	down	--	--	--	Cytochrome c1 OS=Paracoccus denitrificans GN=petC PE=1 SV=1	hypothetical protein TBLA_0E05020 [Tetrapisispora blattae CBS 6284]
c18976.graph_c2	43.2345	20.2091	2.85575e-08	-1.06636	down	Inorganic ion transport and metabolism	Molecular Function: ATP binding (GO:0005524);; Cellular Component: plasma membrane (GO:0005886);; Biological Process: ATP catabolic process (GO:0006200);; Biological Process: ATP biosynthetic process (GO:0006754);; Biological Process: cation transport (GO:0006812);; Molecular Function: ATPase activity, coupled to transmembrane movement of ions, phosphorylative mechanism (GO:0015662);; Cellular Co…	K01535|0.0|pop:POPTR_828261|autoinhibited H+ ATPase	Plasma membrane ATPase OS=Oryza sativa subsp. japonica GN=Os04g0656100 PE=2 SV=1	Plasma membrane ATPase 4 isoform 2 [Theobroma cacao]
c29431.graph_c0	4.17458	1.25089	3.37939e-06	-1.67873	down	--	--	--	Cyclic dof factor 1 OS=Arabidopsis thaliana GN=CDF1 PE=1 SV=2	PREDICTED: dof zinc finger protein DOF5.2-like [Vitis vinifera]
c13660.graph_c0	4.76882	1.42526	5.93967e-05	-1.67421	down	--	--	--	Uncharacterized proline-rich protein (Fragment) OS=Owenia fusiformis PE=4 SV=1	predicted protein [Populus trichocarpa]
c41239.graph_c0	21.8995	10.0882	4.02999e-07	-1.08586	down	--	--	--	Transcription factor bHLH93 OS=Arabidopsis thaliana GN=BHLH93 PE=1 SV=1	DNA binding protein, putative isoform 1 [Theobroma cacao]
c14066.graph_c0	16.8671	5.52429	9.88543e-13	-1.57309	down	--	Cellular Component: extracellular region (GO:0005576);;	--	Transcription factor EMB1444 OS=Arabidopsis thaliana GN=EMB1444 PE=2 SV=1	PREDICTED: uncharacterized protein LOC101257467 [Solanum lycopersicum]
c15021.graph_c0	13.0318	2.11062	0	-2.57889	down	Inorganic ion transport and metabolism	Molecular Function: magnesium ion binding (GO:0000287);; Cellular Component: cytoplasmic mRNA processing body (GO:0000932);; Molecular Function: mRNA binding (GO:0003729);; Cellular Component: nucleus (GO:0005634);; Cellular Component: vacuole (GO:0005773);; Biological Process: fatty acid beta-oxidation (GO:0006635);; Biological Process: primary shoot apical meristem specification (GO:0010072);; …	K14445|0.0|vvi:100255398|hypothetical protein LOC100255398	Tonoplast dicarboxylate transporter OS=Arabidopsis thaliana GN=TDT PE=2 SV=2	PREDICTED: tonoplast dicarboxylate transporter-like [Fragaria vesca subsp. vesca]
c29709.graph_c0	17.2098	7.95543	4.64605e-06	-1.07956	down	--	Biological Process: indoleacetic acid conjugate metabolic process (GO:0033473);; Biological Process: shoot system development (GO:0048367);; Molecular Function: methyl indole-3-acetate esterase activity (GO:0080030);;	--	Methylesterase 17 OS=Arabidopsis thaliana GN=MES17 PE=1 SV=1	PREDICTED: methylesterase 17-like [Solanum lycopersicum]
c18236.graph_c0	15.4314	5.51402	1.55109e-12	-1.45027	down	Secondary metabolites biosynthesis, transport and catabolism	Molecular Function: monooxygenase activity (GO:0004497);; Molecular Function: iron ion binding (GO:0005506);; Molecular Function: electron carrier activity (GO:0009055);; Biological Process: brassinosteroid biosynthetic process (GO:0016132);; Molecular Function: oxidoreductase activity, acting on paired donors, with incorporation or reduction of molecular oxygen (GO:0016705);; Molecular Function:…	--	Cytochrome P450 714A1 OS=Arabidopsis thaliana GN=CYP714A1 PE=2 SV=1	PREDICTED: cytokinin hydroxylase-like [Solanum lycopersicum]
c27651.graph_c0	74.7373	22.4452	0	-1.70459	down	--	Molecular Function: binding (GO:0005488);;	--	Protein CCA1 OS=Arabidopsis thaliana GN=CCA1 PE=1 SV=1	PREDICTED: uncharacterized protein LOC101255972 isoform 1 [Solanum lycopersicum]
c38788.graph_c0	32.1711	7.74474	0	-2.02141	down	Secondary metabolites biosynthesis, transport and catabolism	Molecular Function: monooxygenase activity (GO:0004497);; Molecular Function: oxidoreductase activity, acting on paired donors, with incorporation or reduction of molecular oxygen (GO:0016705);; Molecular Function: metal ion binding (GO:0046872);;	--	Cytochrome P450 81D1 OS=Arabidopsis thaliana GN=CYP81D1 PE=2 SV=1	PREDICTED: isoflavone 2&apos;-hydroxylase-like isoform 1 [Fragaria vesca subsp. vesca]
c38295.graph_c0	5.39294	2.5171	0.00218496	-1.05986	down	--	Molecular Function: carboxypeptidase activity (GO:0004180);; Cellular Component: mitochondrion (GO:0005739);; Cellular Component: cytoplasmic membrane-bounded vesicle (GO:0016023);;	K13289|2e-83|vvi:100248712|hypothetical protein LOC100248712	Serine carboxypeptidase II-3 OS=Hordeum vulgare GN=CXP;2-3 PE=2 SV=1	PREDICTED: serine carboxypeptidase II-3-like [Vitis vinifera]
c37999.graph_c0	18.4964	7.8288	5.24939e-09	-1.20758	down	--	Cellular Component: plasma membrane (GO:0005886);; Biological Process: signal transduction (GO:0007165);; Biological Process: metabolic process (GO:0008152);; Molecular Function: oxidoreductase activity (GO:0016491);;	--	Probable leucine-rich repeat receptor-like protein kinase IMK3 OS=Arabidopsis thaliana GN=IMK3 PE=1 SV=1	PREDICTED: brassinosteroid LRR receptor kinase-like [Solanum lycopersicum]
c42149.graph_c0	10.3867	4.46377	0.00021645	-1.17769	down	--	--	--	--	PREDICTED: uncharacterized protein LOC101251835 isoform 1 [Solanum lycopersicum]
c35697.graph_c1	13.0106	4.95584	0.000103722	-1.34516	down	--	Biological Process: transcription, DNA-templated (GO:0006351);;	--	Scarecrow-like protein 4 OS=Arabidopsis thaliana GN=SCL4 PE=2 SV=1	GRAS family transcription factor [Populus trichocarpa]
c33947.graph_c0	6.11322	2.67566	2.88321e-05	-1.15468	down	--	--	--	Vegetative cell wall protein gp1 OS=Chlamydomonas reinhardtii GN=GP1 PE=2 SV=1	ROSINA DNA binding protein [Antirrhinum majus]
c32570.graph_c0	5.81112	2.56397	0.00705438	-1.135	down	General function prediction only	Cellular Component: cytosol (GO:0005829);; Molecular Function: oxidoreductase activity (GO:0016491);; Biological Process: oxidation-reduction process (GO:0055114);;	--	Uncharacterized oxidoreductase At4g09670 OS=Arabidopsis thaliana GN=At4g09670 PE=1 SV=1	PREDICTED: uncharacterized oxidoreductase At4g09670-like [Glycine max]
c28806.graph_c0	1.21998	0.141239	0.00860574	-2.70695	down	--	--	--	--	hypothetical protein CARUB_v10025917mg [Capsella rubella]
c14864.graph_c0	14.9845	6.85749	6.30599e-05	-1.09161	down	--	--	--	Stem-specific protein TSJT1 OS=Nicotiana tabacum GN=TSJT1 PE=2 SV=1	Aluminum induced protein with YGL and LRDR motifs [Theobroma cacao]
c34377.graph_c0	20.0408	6.158	0	-1.66944	down	Inorganic ion transport and metabolism	Molecular Function: secondary active sulfate transmembrane transporter activity (GO:0008271);; Biological Process: sulfate transport (GO:0008272);; Cellular Component: integral component of membrane (GO:0016021);; Biological Process: transmembrane transport (GO:0055085);;	--	Probable sulfate transporter 3.4 OS=Arabidopsis thaliana GN=SULTR3;4 PE=2 SV=1	PREDICTED: probable sulfate transporter 3.4-like isoform 2 [Vitis vinifera]
c32231.graph_c0	86.2441	30.2649	0	-1.47978	down	--	--	--	Snakin-2 OS=Solanum tuberosum GN=SN2 PE=1 SV=1	Gibberellin-regulated protein 3 precursor, putative [Ricinus communis]
c18557.graph_c0	24.3825	11.1698	0.000224183	-1.08886	down	--	--	--	--	PREDICTED: uncharacterized protein LOC101248137 [Solanum lycopersicum]
c39200.graph_c0	23.3957	10.5392	1.25083e-08	-1.11904	down	--	Biological Process: response to karrikin (GO:0080167);;	--	--	PREDICTED: uncharacterized protein LOC101210853 [Cucumis sativus]
c14517.graph_c0	36.8397	16.1226	6.13236e-09	-1.16026	down	--	--	--	Probable salt tolerance-like protein At1g78600 OS=Arabidopsis thaliana GN=At1g78600 PE=1 SV=2	unnamed protein product [Vitis vinifera]
c38587.graph_c0	9.37935	4.21505	4.63948e-06	-1.11926	down	--	--	--	Zinc finger protein NUTCRACKER OS=Arabidopsis thaliana GN=NUC PE=2 SV=1	Indeterminate(ID)-domain 12 [Theobroma cacao]
c30447.graph_c0	3.24556	1.00198	0.00205695	-1.6167	down	--	Cellular Component: endoplasmic reticulum membrane (GO:0005789);; Biological Process: chloroplast organization (GO:0009658);; Molecular Function: isomerase activity (GO:0016853);; Cellular Component: cortical endoplasmic reticulum (GO:0032541);; Biological Process: cellular protein metabolic process (GO:0044267);;	--	Protein MIZU-KUSSEI 1 OS=Arabidopsis thaliana GN=MIZ1 PE=1 SV=1	PREDICTED: uncharacterized protein LOC101265424 [Solanum lycopersicum]
c30371.graph_c0	80.612	16.2462	0	-2.28006	down	--	--	--	Protein LHY OS=Arabidopsis thaliana GN=LHY PE=1 SV=2	PREDICTED: uncharacterized protein LOC101255972 isoform 1 [Solanum lycopersicum]
c35893.graph_c0	5.93833	1.99135	4.58683e-05	-1.52044	down	--	Biological Process: response to hypoxia (GO:0001666);; Cellular Component: nucleus (GO:0005634);; Biological Process: anaerobic respiration (GO:0009061);; Biological Process: systemic acquired resistance, salicylic acid mediated signaling pathway (GO:0009862);; Biological Process: xylem development (GO:0010089);; Biological Process: regulation of hydrogen peroxide metabolic process (GO:0010310);;…	K10712|1e-108|rcu:RCOM_0855090|Protein C10orf22, putative	2-aminoethanethiol dioxygenase OS=Homo sapiens GN=ADO PE=1 SV=2	PREDICTED: 2-aminoethanethiol dioxygenase-like [Solanum lycopersicum]
c31381.graph_c0	5.53843	1.70985	0.00525642	-1.61132	down	Carbohydrate transport and metabolism	Cellular Component: plasma membrane (GO:0005886);; Molecular Function: pectate lyase activity (GO:0030570);; Cellular Component: anchored component of membrane (GO:0031225);;	K01728|1e-152|rcu:RCOM_1353560|Pectate lyase precursor, putative (EC:4.2.2.2)	Probable pectate lyase 12 OS=Arabidopsis thaliana GN=At3g53190 PE=2 SV=2	PREDICTED: probable pectate lyase 12-like [Fragaria vesca subsp. vesca]
c26502.graph_c0	4.12084	1.02041	0.00593497	-1.88781	down	--	Molecular Function: nucleic acid binding (GO:0003676);;	--	--	predicted protein [Populus trichocarpa]
c42783.graph_c0	3.99886	1.03702	0.00630608	-1.83034	down	--	Biological Process: secondary cell wall biogenesis (GO:0009834);;	--	Leucine-rich repeat extensin-like protein 3 OS=Arabidopsis thaliana GN=LRX3 PE=1 SV=1	PREDICTED: uncharacterized protein LOC100259240 [Vitis vinifera]
c34659.graph_c0	5.59755	2.57463	0.00387781	-1.07913	down	Amino acid transport and metabolism	Cellular Component: endoplasmic reticulum (GO:0005783);; Biological Process: proteolysis (GO:0006508);; Molecular Function: metallopeptidase activity (GO:0008237);; Cellular Component: chloroplast (GO:0009507);; Biological Process: ureide catabolic process (GO:0010136);; Biological Process: chlorophyll catabolic process (GO:0015996);; Molecular Function: allantoate deiminase activity (GO:0047652)…	--	Allantoate deiminase, chloroplastic OS=Arabidopsis thaliana GN=AAH PE=1 SV=2	PREDICTED: allantoate deiminase, chloroplastic-like [Solanum lycopersicum]
c35152.graph_c0	12.6452	2.32281	2.22045e-16	-2.38037	down	Function unknown	--	--	Vacuolar iron transporter homolog 3 OS=Arabidopsis thaliana GN=At3g43630 PE=3 SV=1	Vacuolar iron transporter family protein [Theobroma cacao]
c40490.graph_c0	115.067	49.5301	8.39274e-10	-1.18452	down	--	Biological Process: polysaccharide biosynthetic process (GO:0000271);; Cellular Component: nucleus (GO:0005634);; Cellular Component: plasma membrane (GO:0005886);; Biological Process: water transport (GO:0006833);; Biological Process: Golgi to vacuole transport (GO:0006896);; Biological Process: pattern specification process (GO:0007389);; Biological Process: regulation of cell size (GO:0008361)…	--	Protein WALLS ARE THIN 1 OS=Arabidopsis thaliana GN=WAT1 PE=1 SV=1	nodulin-like protein [Arabidopsis thaliana]
c40109.graph_c0	66.9279	21.2337	0	-1.62678	down	--	--	--	Serine-rich adhesin for platelets OS=Staphylococcus haemolyticus (strain JCSC1435) GN=sraP PE=3 SV=1	PREDICTED: microtubule-associated protein futsch-like [Cicer arietinum]
c14945.graph_c0	63.3367	20.9303	0	-1.56674	down	Transcription	Biological Process: response to stress (GO:0006950);; Biological Process: metabolic process (GO:0008152);; Biological Process: response to chitin (GO:0010200);; Biological Process: regulation of cellular process (GO:0050794);;	--	Heat stress transcription factor B-2a OS=Arabidopsis thaliana GN=HSFB2A PE=2 SV=1	hypothetical protein M569_12169, partial [Genlisea aurea]
c31210.graph_c0	1.04275	0.0388527	0.000168782	-3.73733	down	--	Biological Process: transcription, DNA-templated (GO:0006351);;	--	Scarecrow-like protein 14 OS=Arabidopsis thaliana GN=SCL14 PE=2 SV=2	PREDICTED: scarecrow-like protein 14-like [Solanum lycopersicum]
c40664.graph_c0	58.3108	19.474	0	-1.55112	down	--	--	--	Zinc finger protein CONSTANS-LIKE 4 OS=Arabidopsis thaliana GN=COL4 PE=2 SV=2	PREDICTED: zinc finger protein CONSTANS-LIKE 4-like [Solanum lycopersicum]
c32272.graph_c0	14.6899	7.11192	0.00889789	-1.00684	down	--	Cellular Component: nucleus (GO:0005634);;	--	Probable basic-leucine zipper transcription factor L OS=Dictyostelium discoideum GN=bzpL PE=3 SV=1	PREDICTED: uncharacterized protein LOC100265705 [Vitis vinifera]
c32552.graph_c0	22.945	10.6532	5.50399e-07	-1.07461	down	--	Molecular Function: signal transducer activity (GO:0004871);; Cellular Component: nucleus (GO:0005634);; Cellular Component: cytoplasm (GO:0005737);; Cellular Component: plasma membrane (GO:0005886);; Biological Process: calcium ion transport (GO:0006816);; Biological Process: Golgi organization (GO:0007030);; Biological Process: signal transduction (GO:0007165);; Biological Process: phototropism…	--	Root phototropism protein 2 OS=Arabidopsis thaliana GN=RPT2 PE=1 SV=2	PREDICTED: root phototropism protein 2 [Vitis vinifera]
c17826.graph_c0	7.81945	3.21518	0.00297461	-1.23336	down	General function prediction only	Cellular Component: nucleus (GO:0005634);; Cellular Component: cytosol (GO:0005829);; Molecular Function: lyase activity (GO:0016829);; Molecular Function: protein homodimerization activity (GO:0042803);;	--	Cytokinin riboside 5&apos;-monophosphate phosphoribohydrolase LOG8 OS=Arabidopsis thaliana GN=LOG8 PE=1 SV=1	hypothetical protein PRUPE_ppa022354mg [Prunus persica]
c35335.graph_c1	3.30072	1.12173	3.79191e-09	-1.51578	down	--	--	--	Retrovirus-related Pol polyprotein LINE-1 OS=Mus musculus GN=Pol PE=1 SV=2	hypothetical protein PRUPE_ppa022115mg [Prunus persica]
c34767.graph_c0	4.64163	1.52644	0.000371998	-1.54066	down	Lipid transport and metabolism	Molecular Function: carboxylic ester hydrolase activity (GO:0052689);;	--	Probable carboxylesterase 6 OS=Arabidopsis thaliana GN=CXE6 PE=2 SV=1	PREDICTED: probable carboxylesterase 6-like [Vitis vinifera]
c28589.graph_c0	8.30053	2.55216	1.06137e-13	-1.66296	down	--	Biological Process: response to stimulus (GO:0050896);;	--	BTB/POZ domain-containing protein At5g47800 OS=Arabidopsis thaliana GN=At5g47800 PE=2 SV=1	PREDICTED: BTB/POZ domain-containing protein At5g47800-like [Vitis vinifera]
c38980.graph_c0	5.97456	1.49865	0.00154938	-1.88383	down	--	Molecular Function: transferase activity, transferring hexosyl groups (GO:0016758);;	--	UDP-glycosyltransferase 86A1 OS=Arabidopsis thaliana GN=UGT86A1 PE=2 SV=1	UDP-glucosyltransferase isoform 1 [Picrorhiza kurrooa]
c24422.graph_c0	39.7081	13.9063	0	-1.48265	down	--	Molecular Function: kinase activity (GO:0016301);; Biological Process: phosphorylation (GO:0016310);;	--	Ultraviolet-B receptor UVR8 OS=Arabidopsis thaliana GN=UVR8 PE=1 SV=1	Regulator of chromosome condensation repeat-containing protein isoform 4 [Theobroma cacao]
c24298.graph_c0	14.7826	6.5964	8.96486e-06	-1.12869	down	General function prediction only	Molecular Function: acid phosphatase activity (GO:0003993);; Biological Process: dephosphorylation (GO:0016311);; Biological Process: cellular phosphate ion homeostasis (GO:0030643);; Biological Process: response to hydrogen peroxide (GO:0042542);;	--	Purple acid phosphatase 17 OS=Arabidopsis thaliana GN=PAP17 PE=2 SV=1	unknown [Populus trichocarpa]
c38457.graph_c0	6.80394	3.27639	0.00260871	-1.01627	down	Energy production and conversion	Molecular Function: isocitrate lyase activity (GO:0004451);; Biological Process: glyoxylate cycle (GO:0006097);; Biological Process: tricarboxylic acid cycle (GO:0006099);; Cellular Component: glyoxysome (GO:0009514);; Biological Process: seed dormancy process (GO:0010162);;	K01637|0.0|pop:POPTR_562291|isocitrate lyase (EC:4.1.3.1)	Isocitrate lyase OS=Gossypium hirsutum PE=2 SV=1	RecName: Full=Isocitrate lyase; Short=ICL; Short=Isocitrase; Short=Isocitratase
c40318.graph_c0	628.99	232.839	0	-1.40476	down	--	--	--	Uncharacterized protein AFUA_6G14090 OS=Neosartorya fumigata (strain ATCC MYA-4609 / Af293 / CBS 101355 / FGSC A1100) GN=AFUA_6G14090 PE=1 SV=1	hypothetical protein FOXB_05692 [Fusarium oxysporum Fo5176]
c31653.graph_c2	22.4882	10.7611	0.000129654	-1.02845	down	--	Molecular Function: sequence-specific DNA binding transcription factor activity (GO:0003700);; Cellular Component: nucleus (GO:0005634);; Biological Process: regulation of transcription, DNA-templated (GO:0006355);; Biological Process: fruit development (GO:0010154);; Biological Process: negative regulation of auxin mediated signaling pathway (GO:0010930);; Molecular Function: protein dimerizatio…	--	Auxin-induced protein IAA4 OS=Pisum sativum GN=IAA4/5 PE=1 SV=1	auxin inducible protein IAA3 [Antirrhinum majus]
c42311.graph_c0	7.88611	2.51446	0.00997127	-1.56563	down	--	--	--	--	PREDICTED: uncharacterized protein LOC101509066 [Cicer arietinum]
c32063.graph_c0	49.1955	22.2245	5.73095e-08	-1.11437	down	--	--	--	Protein GLUTAMINE DUMPER 1 OS=Arabidopsis thaliana GN=GDU1 PE=1 SV=1	PREDICTED: protein GLUTAMINE DUMPER 5-like [Cicer arietinum]
c16462.graph_c0	2.9011	0.767691	0.00908223	-1.80186	down	--	--	--	Putative ribonuclease H protein At1g65750 OS=Arabidopsis thaliana GN=At1g65750 PE=3 SV=1	RecName: Full=Putative ribonuclease H protein At1g65750
c25254.graph_c1	18.8645	8.99417	6.19621e-08	-1.03799	down	Cell wall/membrane/envelope biogenesis	Biological Process: signal transduction (GO:0007165);; Cellular Component: membrane (GO:0016020);; Biological Process: transmembrane transport (GO:0055085);;	--	Mechanosensitive ion channel protein 10 OS=Arabidopsis thaliana GN=MSL10 PE=1 SV=1	Mechanosensitive channel of small conductance-like 10 [Theobroma cacao]
c33804.graph_c1	76.481	26.5969	2.29483e-13	-1.48937	down	--	Molecular Function: metal ion binding (GO:0046872);; Biological Process: regulation of cellular process (GO:0050794);;	--	Zinc finger CCCH domain-containing protein 20 OS=Arabidopsis thaliana GN=At2g19810 PE=2 SV=1	PREDICTED: zinc finger CCCH domain-containing protein 20-like [Cicer arietinum]
c35568.graph_c0	3.38895	1.40557	0.00915655	-1.21842	down	Secondary metabolites biosynthesis, transport and catabolism	Molecular Function: iron ion binding (GO:0005506);; Cellular Component: endoplasmic reticulum (GO:0005783);; Molecular Function: electron carrier activity (GO:0009055);; Molecular Function: (S)-limonene 3-monooxygenase activity (GO:0018674);; Molecular Function: (S)-limonene 6-monooxygenase activity (GO:0018675);; Molecular Function: heme binding (GO:0020037);; Cellular Component: membrane part (…	--	Cytochrome P450 71D95 OS=Mentha gracilis GN=CYP71D95 PE=1 SV=1	cytochrome P450 [Salvia miltiorrhiza]
c17499.graph_c0	2.05871	0.660402	0.00724227	-1.55983	down	--	--	--	Putative ribonuclease H protein At1g65750 OS=Arabidopsis thaliana GN=At1g65750 PE=3 SV=1	hypothetical protein PRUPE_ppa016553mg [Prunus persica]
c41621.graph_c0	19.9796	8.99529	0.000142363	-1.11358	down	--	Cellular Component: Golgi apparatus (GO:0005794);; Cellular Component: cytosol (GO:0005829);; Cellular Component: plant-type cell wall (GO:0009505);; Cellular Component: plasmodesma (GO:0009506);; Cellular Component: chloroplast (GO:0009507);; Biological Process: response to arsenic-containing substance (GO:0046685);;	--	--	putative phosphate-induced protein [Capsicum chinense]
c40659.graph_c0	105.784	46.5721	1.73417e-12	-1.15438	down	--	Molecular Function: signal transducer activity (GO:0004871);; Cellular Component: nucleus (GO:0005634);; Cellular Component: cytoplasm (GO:0005737);; Cellular Component: plasma membrane (GO:0005886);; Biological Process: calcium ion transport (GO:0006816);; Biological Process: Golgi organization (GO:0007030);; Biological Process: signal transduction (GO:0007165);; Biological Process: phototropism…	--	Root phototropism protein 2 OS=Arabidopsis thaliana GN=RPT2 PE=1 SV=2	PREDICTED: root phototropism protein 2-like [Solanum lycopersicum]
c38928.graph_c0	3.9083	1.75242	0.00235587	-1.11519	down	--	Molecular Function: binding (GO:0005488);;	--	Uncharacterized mitochondrial protein AtMg00310 OS=Arabidopsis thaliana GN=AtMg00310 PE=4 SV=1	hypothetical protein M569_00896, partial [Genlisea aurea]
c18703.graph_c0	22.0369	4.02223	7.42628e-13	-2.37699	down	--	Biological Process: defense response (GO:0006952);; Biological Process: response to biotic stimulus (GO:0009607);;	--	MLP-like protein 31 OS=Arabidopsis thaliana GN=MLP31 PE=2 SV=2	putative major latex-like protein [Salvia miltiorrhiza]
c14568.graph_c1	12.2807	5.5147	0.00174135	-1.11367	down	--	--	--	ZF-HD homeobox protein At4g24660 OS=Arabidopsis thaliana GN=At4g24660 PE=1 SV=1	hypothetical protein M569_13783, partial [Genlisea aurea]
c19358.graph_c0	12.3186	5.9927	8.18101e-06	-1.00723	down	--	Molecular Function: protein binding (GO:0005515);; Biological Process: post-embryonic development (GO:0009791);; Biological Process: heterocycle biosynthetic process (GO:0018130);; Biological Process: aromatic compound biosynthetic process (GO:0019438);; Biological Process: primary metabolic process (GO:0044238);; Biological Process: cellular nitrogen compound biosynthetic process (GO:0044271);; …	--	Transcription factor PIF1 OS=Arabidopsis thaliana GN=PIF1 PE=1 SV=1	PREDICTED: transcription factor PIF1-like isoform X6 [Cicer arietinum]
c42429.graph_c0	4.95188	1.4863	1.63561e-06	-1.67808	down	--	Molecular Function: copper ion binding (GO:0005507);; Molecular Function: primary amine oxidase activity (GO:0008131);; Biological Process: amine metabolic process (GO:0009308);; Cellular Component: chloroplast (GO:0009507);; Molecular Function: transferase activity, transferring acyl groups other than amino-acyl groups (GO:0016747);; Molecular Function: quinone binding (GO:0048038);; Biological …	--	Shikimate O-hydroxycinnamoyltransferase OS=Nicotiana tabacum GN=HST PE=1 SV=1	PREDICTED: omega-hydroxypalmitate O-feruloyl transferase [Vitis vinifera]
c38084.graph_c0	19.7435	9.37383	8.64214e-06	-1.04152	down	Cell wall/membrane/envelope biogenesis	Cellular Component: plasma membrane (GO:0005886);; Biological Process: secondary cell wall biogenesis (GO:0009834);; Cellular Component: anchored component of membrane (GO:0031225);;	--	Fasciclin-like arabinogalactan protein 11 OS=Arabidopsis thaliana GN=FLA11 PE=2 SV=2	putative cell surface adhesion protein [Zinnia violacea]
c19876.graph_c0	18.9303	8.4813	4.33829e-05	-1.12166	down	--	Biological Process: transcription, DNA-templated (GO:0006351);; Biological Process: response to auxin (GO:0009733);; Biological Process: single-organism process (GO:0044699);; Biological Process: regulation of cellular process (GO:0050794);;	K14484|1e-66|pop:POPTR_829522|hypothetical protein	Auxin-induced protein AUX22 OS=Glycine max GN=AUX22 PE=2 SV=1	unknown [Lotus japonicus]
c41020.graph_c0	58.4689	27.1904	2.14651e-09	-1.07452	down	General function prediction only	Biological Process: metabolic process (GO:0008152);; Molecular Function: phosphoglycolate phosphatase activity (GO:0008967);; Biological Process: response to arsenic-containing substance (GO:0046685);; Biological Process: photoperiodism, flowering (GO:0048573);;	--	Haloacid dehalogenase-like hydrolase domain-containing protein 3 OS=Mus musculus GN=Hdhd3 PE=2 SV=1	hypothetical protein PRUPE_ppa009153mg [Prunus persica]
c24427.graph_c0	26.3156	7.98956	0	-1.68458	down	Carbohydrate transport and metabolism	Biological Process: pentose-phosphate shunt (GO:0006098);; Molecular Function: 6-phosphogluconolactonase activity (GO:0017057);;	--	Probable 6-phosphogluconolactonase 2 OS=Oryza sativa subsp. japonica GN=Os07g0604000 PE=2 SV=1	PREDICTED: probable 6-phosphogluconolactonase 1-like [Solanum lycopersicum]
c34489.graph_c0	6.45331	1.92871	5.93967e-05	-1.67421	down	Function unknown	Cellular Component: vacuolar membrane (GO:0005774);; Biological Process: acetyl-CoA metabolic process (GO:0006084);; Biological Process: calcium ion transport (GO:0006816);; Biological Process: Golgi organization (GO:0007030);; Biological Process: response to salt stress (GO:0009651);; Biological Process: sterol biosynthetic process (GO:0016126);; Biological Process: brassinosteroid biosynthetic …	--	Fasciclin-like arabinogalactan protein 2 OS=Arabidopsis thaliana GN=FLA2 PE=1 SV=1	fasciclin-like arabinogalactan protein 19, partial [Genlisea aurea]
c38285.graph_c0	5.45005	1.49389	2.39808e-13	-1.82283	down	--	Cellular Component: plasma membrane (GO:0005886);; Biological Process: phosphate ion transport (GO:0006817);; Cellular Component: integral component of membrane (GO:0016021);; Biological Process: cellular response to phosphate starvation (GO:0016036);; Biological Process: galactolipid biosynthetic process (GO:0019375);; Biological Process: negative regulation of transcription, DNA-templated (GO:0…	--	Phosphate transporter PHO1 homolog 1 OS=Arabidopsis thaliana GN=PHO1-H1 PE=2 SV=1	PREDICTED: phosphate transporter PHO1 homolog 1 isoform 2 [Vitis vinifera]
c40510.graph_c0	99.6543	23.1059	0	-2.07724	down	--	Cellular Component: nucleus (GO:0005634);;	--	--	PREDICTED: uncharacterized protein LOC101248120 [Solanum lycopersicum]
c18348.graph_c0	11.6737	2.78961	0	-2.01999	down	General function prediction only	Molecular Function: iron ion binding (GO:0005506);; Molecular Function: transcription factor binding (GO:0008134);; Biological Process: gibberellin biosynthetic process (GO:0009686);; Biological Process: response to gibberellin (GO:0009739);; Biological Process: seed germination (GO:0009845);; Biological Process: response to red light (GO:0010114);; Molecular Function: gibberellin 3-beta-dioxygen…	--	Gibberellin 3-beta-dioxygenase 1 OS=Arabidopsis thaliana GN=GA3OX1 PE=1 SV=2	gibberellin 3-oxidase [Torenia fournieri]
c38455.graph_c0	61.1764	27.3725	7.25773e-11	-1.13037	down	General function prediction only	Molecular Function: nucleotide binding (GO:0000166);; Molecular Function: RNA binding (GO:0003723);; Cellular Component: plastid (GO:0009536);; Biological Process: response to high light intensity (GO:0009644);; Biological Process: regulation of RNA splicing (GO:0043484);;	--	Serine/arginine repetitive matrix protein 5 OS=Homo sapiens GN=SRRM5 PE=1 SV=3	PREDICTED: uncharacterized protein LOC101294250 [Fragaria vesca subsp. vesca]
c36384.graph_c1	2.91943	0.879135	0.00520078	-1.64342	down	General function prediction only	Molecular Function: iron ion binding (GO:0005506);; Molecular Function: oxidoreductase activity, acting on paired donors, with incorporation or reduction of molecular oxygen, 2-oxoglutarate as one donor, and incorporation of one atom each of oxygen into both donors (GO:0016706);; Biological Process: oxidation-reduction process (GO:0055114);;	K05282|0.0|rcu:RCOM_1498120|gibberellin 20-oxidase, putative (EC:1.14.11.15)	Gibberellin 20 oxidase 2 OS=Arabidopsis thaliana GN=GA20OX2 PE=2 SV=1	gibberellin 20-oxidase [Torenia fournieri]
c41989.graph_c0	16.891	6.84424	3.29278e-08	-1.26806	down	--	Cellular Component: integral component of membrane (GO:0016021);;	--	Tetraspanin-6 OS=Arabidopsis thaliana GN=TET6 PE=2 SV=1	PREDICTED: tetraspanin-6-like [Solanum lycopersicum]
c41946.graph_c0	21.9771	10.209	2.05994e-06	-1.07317	down	Inorganic ion transport and metabolism	Biological Process: iron ion transport (GO:0006826);; Biological Process: cellular iron ion homeostasis (GO:0006879);; Biological Process: response to oxidative stress (GO:0006979);; Molecular Function: ferric iron binding (GO:0008199);; Biological Process: response to abscisic acid (GO:0009737);; Molecular Function: oxidoreductase activity (GO:0016491);; Biological Process: oxidation-reduction p…	K00522|1e-120|rcu:RCOM_0847660|ferritin, plant, putative (EC:1.16.3.1)	Ferritin-3, chloroplastic OS=Glycine max PE=2 SV=1	hypothetical protein PRUPE_ppa010086mg [Prunus persica]
c40839.graph_c0	62.6948	25.3736	5.31797e-14	-1.27493	down	--	Biological Process: response to stress (GO:0006950);; Biological Process: response to abiotic stimulus (GO:0009628);; Biological Process: response to chitin (GO:0010200);; Biological Process: negative regulation of transcription, DNA-templated (GO:0045892);;	--	Heat stress transcription factor B-2a OS=Arabidopsis thaliana GN=HSFB2A PE=2 SV=1	hypothetical protein M569_12169, partial [Genlisea aurea]
c40587.graph_c0	98.675	42.7295	2.36527e-11	-1.17718	down	Intracellular trafficking, secretion, and vesicular transport	Biological Process: multicellular organismal development (GO:0007275);; Biological Process: response to desiccation (GO:0009269);; Biological Process: response to salt stress (GO:0009651);; Biological Process: anatomical structure development (GO:0048856);;	--	HVA22-like protein e OS=Arabidopsis thaliana GN=HVA22E PE=2 SV=1	PREDICTED: HVA22-like protein e-like [Solanum lycopersicum]
c23799.graph_c0	7.64915	1.51334	5.29908e-06	-2.22003	down	--	--	--	--	PREDICTED: uncharacterized protein LOC100251924 [Vitis vinifera]
c38155.graph_c0	6.57116	3.02293	1.9613e-05	-1.08533	down	--	Cellular Component: mitochondrion (GO:0005739);;	--	Rab9 effector protein with kelch motifs OS=Bos taurus GN=RABEPK PE=2 SV=1	unnamed protein product [Vitis vinifera]
c41105.graph_c0	28.7207	12.3802	7.84701e-10	-1.18253	down	--	--	K09422|1e-118|vvi:100233128|SREBP	Transcription factor MYB44 OS=Arabidopsis thaliana GN=MYB44 PE=2 SV=1	PREDICTED: transcription factor MYB44-like [Solanum lycopersicum]
c42353.graph_c0	9.43982	3.909	0.000134233	-1.22975	down	--	Cellular Component: chloroplast (GO:0009507);;	--	Protein MIZU-KUSSEI 1 OS=Arabidopsis thaliana GN=MIZ1 PE=1 SV=1	PREDICTED: uncharacterized protein LOC101315015 [Fragaria vesca subsp. vesca]
c23183.graph_c0	8.92836	1.48422	6.46571e-05	-2.41365	down	--	Molecular Function: sequence-specific DNA binding transcription factor activity (GO:0003700);; Molecular Function: protein binding (GO:0005515);; Cellular Component: nucleus (GO:0005634);; Molecular Function: zinc ion binding (GO:0008270);; Biological Process: response to blue light (GO:0009637);; Biological Process: response to high light intensity (GO:0009644);; Biological Process: response to …	--	Zinc finger protein CONSTANS-LIKE 3 OS=Arabidopsis thaliana GN=COL3 PE=1 SV=1	hypothetical protein M569_01485, partial [Genlisea aurea]
c44469.graph_c0	1.47788	0.0939355	7.94323e-05	-3.38582	down	--	Cellular Component: chloroplast thylakoid lumen (GO:0009543);;	--	Uncharacterized protein At4g15970 OS=Arabidopsis thaliana GN=At4g15970 PE=2 SV=1	pentatricopeptide repeat-containing protein, putative [Ricinus communis]
c16649.graph_c0	4.60428	0.995017	0.00333826	-2.05877	down	--	Cellular Component: cytoplasm (GO:0005737);; Biological Process: photomorphogenesis (GO:0009640);; Biological Process: response to abscisic acid (GO:0009737);; Biological Process: seed germination (GO:0009845);; Biological Process: regulation of flower development (GO:0009909);; Biological Process: meristem structural organization (GO:0009933);; Biological Process: sugar mediated signaling pathwa…	--	Em-like protein GEA6 OS=Arabidopsis thaliana GN=EM6 PE=2 SV=1	hypothetical protein CARUB_v10025705mg [Capsella rubella]
c31123.graph_c0	2.25245	0.50514	0.000875147	-2.02756	down	--	Biological Process: activation of MAPKK activity (GO:0000186);; Molecular Function: MAP kinase kinase kinase activity (GO:0004709);; Molecular Function: ATP binding (GO:0005524);;	--	Putative serine/threonine-protein kinase/receptor R826 OS=Acanthamoeba polyphaga mimivirus GN=MIMI_R826 PE=4 SV=2	PREDICTED: putative serine/threonine-protein kinase/receptor R826-like [Solanum lycopersicum]
c39078.graph_c0	23.8269	10.0123	1.46527e-07	-1.21599	down	Amino acid transport and metabolism	Molecular Function: glutamate dehydrogenase [NAD(P)+] activity (GO:0004353);; Molecular Function: copper ion binding (GO:0005507);; Molecular Function: ATP binding (GO:0005524);; Cellular Component: mitochondrion (GO:0005739);; Biological Process: cellular amino acid metabolic process (GO:0006520);; Molecular Function: zinc ion binding (GO:0008270);; Biological Process: response to absence of lig…	K00261|1e-176|rcu:RCOM_1121650|glutamate dehydrogenase, putative (EC:1.4.1.3)	Glutamate dehydrogenase B OS=Nicotiana plumbaginifolia GN=GDHB PE=2 SV=1	glutamate dehydrogenase, putative [Ricinus communis]
c26672.graph_c0	7.3482	1.62409	9.98984e-07	-2.08605	down	--	--	--	LOB domain-containing protein 21 OS=Arabidopsis thaliana GN=LBD21 PE=2 SV=1	unknown [Populus trichocarpa]
c19778.graph_c0	18.5828	6.91893	1.52511e-10	-1.39013	down	--	Molecular Function: intracellular cAMP activated cation channel activity (GO:0005222);; Molecular Function: inward rectifier potassium channel activity (GO:0005242);; Molecular Function: calcium channel activity (GO:0005262);; Molecular Function: calmodulin binding (GO:0005516);; Cellular Component: plasma membrane (GO:0005886);; Biological Process: nitric oxide mediated signal transduction (GO:0…	--	Cyclic nucleotide-gated ion channel 2 OS=Arabidopsis thaliana GN=CNGC2 PE=1 SV=1	PREDICTED: cyclic nucleotide-gated ion channel 2-like isoform 1 [Solanum lycopersicum]
c31581.graph_c0	30.8934	14.8392	2.39303e-08	-1.02777	down	--	Molecular Function: protein serine/threonine kinase activity (GO:0004674);; Molecular Function: ATP binding (GO:0005524);; Biological Process: protein phosphorylation (GO:0006468);;	--	Pentatricopeptide repeat-containing protein At5g21222 OS=Arabidopsis thaliana GN=ATC401 PE=2 SV=1	PREDICTED: pentatricopeptide repeat-containing protein At5g21222-like [Solanum lycopersicum]
c17035.graph_c0	13.109	6.0987	0.00590244	-1.06261	down	--	--	--	--	PREDICTED: uncharacterized protein LOC100251924 [Vitis vinifera]
c18124.graph_c0	22.5225	10.7475	4.16402e-08	-1.0369	down	Secondary metabolites biosynthesis, transport and catabolism	Molecular Function: copper ion binding (GO:0005507);; Cellular Component: extracellular region (GO:0005576);; Cellular Component: endosome (GO:0005768);; Cellular Component: vacuole (GO:0005773);; Cellular Component: Golgi apparatus (GO:0005794);; Cellular Component: trans-Golgi network (GO:0005802);; Molecular Function: primary amine oxidase activity (GO:0008131);; Biological Process: amine meta…	--	Primary amine oxidase OS=Arabidopsis thaliana GN=At1g62810 PE=2 SV=1	Amine oxidase [copper-containing] precursor, putative [Ricinus communis]
c32340.graph_c0	12.1879	2.7175	0	-2.11857	down	--	Cellular Component: chloroplast (GO:0009507);; Cellular Component: membrane (GO:0016020);;	--	WAT1-related protein At5g07050 OS=Arabidopsis thaliana GN=At5g07050 PE=2 SV=1	PREDICTED: auxin-induced protein 5NG4 isoform 1 [Vitis vinifera]
c30785.graph_c0	3.32377	1.25484	0.00784835	-1.34526	down	--	Cellular Component: cell wall (GO:0005618);; Cellular Component: nucleus (GO:0005634);; Biological Process: regulation of transcription, DNA-templated (GO:0006355);; Molecular Function: transcription regulatory region DNA binding (GO:0044212);; Biological Process: integument development (GO:0080060);;	--	Probable transcription factor KAN4 OS=Arabidopsis thaliana GN=KAN4 PE=1 SV=1	PREDICTED: probable transcription factor KAN4-like [Vitis vinifera]
c27354.graph_c0	3.84611	0.44527	0.00860574	-2.70695	down	--	Cellular Component: intracellular (GO:0005622);; Molecular Function: metal ion binding (GO:0046872);;	--	Zinc finger protein 6 OS=Arabidopsis thaliana GN=ZFP6 PE=2 SV=1	PREDICTED: zinc finger protein 6 [Vitis vinifera]
c29122.graph_c0	1.39808	11.6322	7.07112e-11	2.94662	up	--	Molecular Function: protein binding (GO:0005515);; Cellular Component: plasma membrane (GO:0005886);; Cellular Component: anchored component of membrane (GO:0031225);; Biological Process: cellular metabolic process (GO:0044237);; Biological Process: root hair elongation (GO:0048767);; Biological Process: organic substance metabolic process (GO:0071704);;	--	Arabinogalactan peptide 13 OS=Arabidopsis thaliana GN=AGP13 PE=1 SV=1	predicted protein [Populus trichocarpa]
c24630.graph_c0	34.1406	67.1722	2.27744e-08	1.00387	up	Translation, ribosomal structure and biogenesis	Molecular Function: translation elongation factor activity (GO:0003746);; Biological Process: translational elongation (GO:0006414);; Cellular Component: chloroplast stroma (GO:0009570);; Biological Process: embryo development ending in seed dormancy (GO:0009793);; Biological Process: iron-sulfur cluster assembly (GO:0016226);; Biological Process: peptide biosynthetic process (GO:0043043);; Biolo…	K02356|1e-108|vvi:100241479|hypothetical protein LOC100241479	Elongation factor P OS=Synechococcus sp. (strain ATCC 27264 / PCC 7002 / PR-6) GN=efp PE=3 SV=1	hypothetical protein M569_04054, partial [Genlisea aurea]
c45495.graph_c0	0.329447	1.31438	0.00137406	1.93298	up	--	Cellular Component: vacuole (GO:0005773);; Biological Process: carbohydrate transport (GO:0008643);; Molecular Function: carbohydrate transmembrane transporter activity (GO:0015144);; Cellular Component: membrane (GO:0016020);; Molecular Function: oxidoreductase activity (GO:0016491);; Biological Process: transmembrane transport (GO:0055085);;	--	Monosaccharide-sensing protein 2 OS=Arabidopsis thaliana GN=MSSP2 PE=2 SV=2	sugar transporter, putative [Ricinus communis]
c40431.graph_c0	140.972	296.932	7.85905e-12	1.10311	up	General function prediction only	Molecular Function: RNA binding (GO:0003723);; Biological Process: RNA metabolic process (GO:0016070);; Cellular Component: chloroplast part (GO:0044434);;	--	31 kDa ribonucleoprotein, chloroplastic OS=Nicotiana sylvestris PE=1 SV=1	RecName: Full=31 kDa ribonucleoprotein, chloroplastic; Flags: Precursor
c26084.graph_c0	2.66605	6.39108	1.02054e-08	1.28352	up	--	Biological Process: response to light stimulus (GO:0009416);; Biological Process: RNA modification (GO:0009451);; Cellular Component: chloroplast (GO:0009507);; Biological Process: chloroplast organization (GO:0009658);; Biological Process: growth (GO:0040007);;	--	Pentatricopeptide repeat-containing protein At1g15510, chloroplastic OS=Arabidopsis thaliana GN=PCMP-H73 PE=2 SV=1	PREDICTED: pentatricopeptide repeat-containing protein At1g15510, chloroplastic-like [Solanum lycopersicum]
c41645.graph_c0	4.55662	14.9135	3.5669e-11	1.72246	up	Inorganic ion transport and metabolism	Molecular Function: superoxide dismutase activity (GO:0004784);; Biological Process: superoxide metabolic process (GO:0006801);; Cellular Component: nucleoid (GO:0009295);; Biological Process: response to UV (GO:0009411);; Cellular Component: chloroplast (GO:0009507);; Molecular Function: metal ion binding (GO:0046872);; Biological Process: oxidation-reduction process (GO:0055114);;	K04564|1e-113|vvi:100258067|hypothetical protein LOC100258067	Superoxide dismutase [Fe], chloroplastic (Fragment) OS=Nicotiana plumbaginifolia GN=SODB PE=2 SV=1	Fe-superoxide dismutase [Haberlea rhodopensis]
c30181.graph_c0	2.31219	5.1951	0.000801667	1.18179	up	--	Biological Process: developmental process (GO:0032502);; Biological Process: single-organism cellular process (GO:0044763);; Biological Process: regulation of cellular process (GO:0050794);; Biological Process: response to stimulus (GO:0050896);;	--	Transcription factor TCP3 OS=Arabidopsis thaliana GN=TCP3 PE=2 SV=1	TCP transcription factor 1 [Solanum lycopersicum]
c46245.graph_c0	0	1.28092	5.89873e-05	4.51541	up	--	--	--	Uncharacterized protein At2g29880 OS=Arabidopsis thaliana GN=At2g29880 PE=2 SV=1	PREDICTED: uncharacterized protein LOC101255640 [Solanum lycopersicum]
c36333.graph_c0	2.20855	6.71869	4.11322e-09	1.61651	up	--	Biological Process: metabolic process (GO:0008152);; Molecular Function: UDP-glucosyltransferase activity (GO:0035251);; Biological Process: response to chemical (GO:0042221);;	K08237|1e-162|pop:POPTR_731288|hypothetical protein	Hydroquinone glucosyltransferase OS=Rauvolfia serpentina GN=AS PE=1 SV=1	predicted protein [Populus trichocarpa]
c14278.graph_c0	712.385	1433.85	7.97657e-10	1.03781	up	Coenzyme transport and metabolism	Cellular Component: mitochondrion (GO:0005739);; Cellular Component: cytosol (GO:0005829);; Biological Process: cellular response to DNA damage stimulus (GO:0006974);; Molecular Function: zinc ion binding (GO:0008270);; Biological Process: thiamine biosynthetic process (GO:0009228);; Biological Process: response to cold (GO:0009409);; Cellular Component: chloroplast stroma (GO:0009570);; Cellular…	K03146|0.0|vvi:100265774|hypothetical protein LOC100265774	Thiamine thiazole synthase 2, chloroplastic OS=Vitis vinifera GN=THI1-2 PE=2 SV=1	thiamine biosynthetic enzyme [Picrorhiza kurrooa]
c20611.graph_c0	13.6942	31.579	3.34326e-05	1.22247	up	--	Molecular Function: hydrolase activity, hydrolyzing O-glycosyl compounds (GO:0004553);; Cellular Component: cytoplasm (GO:0005737);; Cellular Component: plasma membrane (GO:0005886);; Biological Process: aging (GO:0007568);; Biological Process: response to heat (GO:0009408);; Biological Process: response to cold (GO:0009409);; Cellular Component: plant-type cell wall (GO:0009505);; Biological Pro…	--	Probable xyloglucan endotransglucosylase/hydrolase protein 15 OS=Arabidopsis thaliana GN=XTH15 PE=1 SV=1	xyloglucan endotransglucosylase-hydrolase XTH9 precursor [Solanum lycopersicum]
c26742.graph_c1	5.78848	11.7735	0.00806796	1.04037	up	Amino acid transport and metabolism	Molecular Function: threonine synthase activity (GO:0004795);; Cellular Component: cytosol (GO:0005829);; Biological Process: threonine biosynthetic process (GO:0009088);; Cellular Component: chloroplast stroma (GO:0009570);; Molecular Function: pyridoxal phosphate binding (GO:0030170);;	K01733|1e-155|rcu:RCOM_0654720|threonine synthase, putative (EC:4.2.3.1)	Threonine synthase 1, chloroplastic OS=Arabidopsis thaliana GN=TS1 PE=1 SV=1	PREDICTED: threonine synthase 1, chloroplastic-like [Fragaria vesca subsp. vesca]
c27906.graph_c1	13.4027	33.2358	4.0964e-09	1.33166	up	--	Cellular Component: mitochondrion (GO:0005739);; Cellular Component: photosynthetic membrane (GO:0034357);;	--	--	PREDICTED: uncharacterized protein LOC101247619 [Solanum lycopersicum]
c38706.graph_c0	18.8244	81.8642	0	2.14684	up	--	Molecular Function: transferase activity, transferring acyl groups other than amino-acyl groups (GO:0016747);;	--	Pelargonidin 3-O-(6-caffeoylglucoside) 5-O-(6-O-malonylglucoside) 4&apos;&apos;&apos;-malonyltransferase OS=Salvia splendens PE=1 SV=1	predicted protein [Populus trichocarpa]
c32422.graph_c0	1.19903	3.963	0.00486604	1.68712	up	--	--	--	--	Late embryogenesis abundant hydroxyproline-rich glycofamily protein, putative [Theobroma cacao]
c37282.graph_c0	4.12698	14.0151	0	1.78514	up	--	Molecular Function: nucleotide binding (GO:0000166);; Biological Process: response to molecule of fungal origin (GO:0002238);; Molecular Function: protein kinase activity (GO:0004672);; Biological Process: phosphorylation (GO:0016310);;	--	Probable receptor-like serine/threonine-protein kinase At5g57670 OS=Arabidopsis thaliana GN=At5g57670 PE=2 SV=1	PREDICTED: probable receptor-like serine/threonine-protein kinase At5g57670-like [Solanum lycopersicum]
c27409.graph_c0	0.931263	4.84836	2.45225e-05	2.29271	up	--	Cellular Component: nucleus (GO:0005634);; Biological Process: response to sucrose (GO:0009744);; Biological Process: flavonoid biosynthetic process (GO:0009813);; Biological Process: response to UV-B (GO:0010224);; Biological Process: response to karrikin (GO:0080167);;	--	--	hypothetical protein VITISV_023275 [Vitis vinifera]
c18916.graph_c0	2.68196	7.20572	0.000482916	1.42642	up	--	Biological Process: seed coat development (GO:0010214);; Molecular Function: pectinesterase inhibitor activity (GO:0046910);;	--	21 kDa protein OS=Daucus carota PE=2 SV=1	PREDICTED: 21 kDa protein-like [Solanum lycopersicum]
c34314.graph_c0	0.844215	16.0287	0	4.16697	up	--	Molecular Function: catalytic activity (GO:0003824);;	--	Putative protein TPRXL OS=Homo sapiens GN=TPRXL PE=5 SV=2	Dan4p [Saccharomyces cerevisiae S288c]
c38863.graph_c2	22.7818	48.5309	1.62274e-10	1.11826	up	--	Molecular Function: UDP-glycosyltransferase activity (GO:0008194);; Biological Process: ethylene-activated signaling pathway (GO:0009873);; Molecular Function: transferase activity, transferring hexosyl groups (GO:0016758);;	--	UDP-glycosyltransferase 86A1 OS=Arabidopsis thaliana GN=UGT86A1 PE=2 SV=1	PREDICTED: UDP-glycosyltransferase 86A1-like [Solanum lycopersicum]
c38045.graph_c0	0.190997	1.65103	0.00913686	2.73096	up	--	Cellular Component: plasma membrane (GO:0005886);; Biological Process: amino acid transport (GO:0006865);; Biological Process: regulation of meristem growth (GO:0010075);; Molecular Function: amino acid transmembrane transporter activity (GO:0015171);; Cellular Component: integral component of membrane (GO:0016021);;	--	Lysine histidine transporter-like 8 OS=Arabidopsis thaliana GN=AATL1 PE=1 SV=1	PREDICTED: lysine histidine transporter-like 8 [Vitis vinifera]
c27505.graph_c0	17.9903	39.7977	1.75745e-09	1.171	up	Posttranslational modification, protein turnover, chaperones	Biological Process: pentose-phosphate shunt (GO:0006098);; Cellular Component: chloroplast thylakoid membrane (GO:0009535);; Biological Process: megagametogenesis (GO:0009561);; Biological Process: chloroplast relocation (GO:0009902);; Biological Process: thylakoid membrane organization (GO:0010027);; Biological Process: PSII associated light-harvesting complex II catabolic process (GO:0010304);;…	--	--	predicted protein [Populus trichocarpa]
c32880.graph_c0	1.09301	3.03133	0.00147571	1.46519	up	--	Biological Process: cellular process (GO:0009987);;	--	Coleoptile phototropism protein 1 OS=Oryza sativa subsp. japonica GN=CPT1 PE=2 SV=1	Phototropic-responsive NPH3 family protein [Theobroma cacao]
c31146.graph_c0	6.79144	22.8746	5.55112e-16	1.77002	up	--	Molecular Function: nucleotide binding (GO:0000166);; Molecular Function: 3-beta-hydroxy-delta5-steroid dehydrogenase activity (GO:0003854);; Cellular Component: cytosol (GO:0005829);; Biological Process: steroid metabolic process (GO:0008202);; Biological Process: xylem and phloem pattern formation (GO:0010051);; Biological Process: cellular metabolic process (GO:0044237);; Molecular Function: d…	--	3-oxo-Delta(4,5)-steroid 5-beta-reductase OS=Digitalis lanata PE=1 SV=1	PREDICTED: uncharacterized protein C757.02c-like [Vitis vinifera]
c36995.graph_c0	7.85709	17.0408	3.47276e-06	1.13904	up	Function unknown	Cellular Component: nucleus (GO:0005634);; Biological Process: aromatic amino acid family biosynthetic process (GO:0009073);; Cellular Component: chloroplast thylakoid membrane (GO:0009535);; Cellular Component: chloroplast stroma (GO:0009570);; Biological Process: NAD(P)H dehydrogenase complex assembly (GO:0010275);; Biological Process: iron-sulfur cluster assembly (GO:0016226);;	--	--	PREDICTED: uncharacterized protein LOC100255118 [Vitis vinifera]
c45781.graph_c0	0.116904	2.40006	0.00860327	3.3556	up	Carbohydrate transport and metabolism	Molecular Function: fructose-bisphosphate aldolase activity (GO:0004332);; Molecular Function: copper ion binding (GO:0005507);; Cellular Component: cell wall (GO:0005618);; Cellular Component: nucleolus (GO:0005730);; Cellular Component: mitochondrial envelope (GO:0005740);; Cellular Component: cytosol (GO:0005829);; Cellular Component: plasma membrane (GO:0005886);; Biological Process: glycolys…	K01623|1e-90|sbi:SORBI_04g019020|hypothetical protein	Fructose-bisphosphate aldolase cytoplasmic isozyme OS=Oryza sativa subsp. japonica GN=FBA PE=1 SV=2	fructose-bisphosphate aldolase [Persea americana]
c14274.graph_c1	160.347	421.958	0	1.42435	up	Coenzyme transport and metabolism	Cellular Component: cytosol (GO:0005829);; Biological Process: response to stress (GO:0006950);; Biological Process: thiamine biosynthetic process (GO:0009228);; Cellular Component: chloroplast stroma (GO:0009570);; Molecular Function: metal ion binding (GO:0046872);; Biological Process: thiazole biosynthetic process (GO:0052837);;	K03146|4e-52|pop:POPTR_568201|thiazole synthase	Thiamine thiazole synthase 2, chloroplastic OS=Vitis vinifera GN=THI1-2 PE=2 SV=1	unknown [Populus trichocarpa]
c34838.graph_c0	8.80151	22.6437	1.80019e-09	1.38379	up	--	Cellular Component: chloroplast thylakoid membrane (GO:0009535);;	--	--	Chaperone DnaJ-domain superfamily protein [Theobroma cacao]
c35051.graph_c0	20.1739	41.229	2.79407e-08	1.0577	up	--	Cellular Component: plasma membrane (GO:0005886);; Biological Process: defense response (GO:0006952);; Cellular Component: plant-type cell wall (GO:0009505);; Molecular Function: (+)-neomenthol dehydrogenase activity (GO:0047501);; Molecular Function: (-)-menthol dehydrogenase activity (GO:0047504);; Biological Process: oxidation-reduction process (GO:0055114);; Biological Process: response to ka…	--	(+)-neomenthol dehydrogenase OS=Arabidopsis thaliana GN=SDR1 PE=1 SV=1	unnamed protein product [Vitis vinifera]
c38590.graph_c0	1.79566	4.2089	0.000159223	1.24282	up	--	Molecular Function: protein kinase activity (GO:0004672);; Molecular Function: binding (GO:0005488);;	--	Probable receptor-like protein kinase At1g67000 OS=Arabidopsis thaliana GN=At1g67000 PE=2 SV=2	PREDICTED: probable receptor-like protein kinase At5g39020-like [Vitis vinifera]
c28632.graph_c0	5.75611	18.3763	2.91036e-10	1.68599	up	--	Biological Process: transport (GO:0006810);;	--	Non-specific lipid-transfer protein 2 OS=Nicotiana tabacum PE=3 SV=1	lipid transfer protein 2 [Salvia miltiorrhiza]
c13588.graph_c0	2.04036	5.90539	0.000968441	1.52345	up	--	--	--	--	PREDICTED: uncharacterized protein LOC100262963 [Vitis vinifera]
c30134.graph_c0	7.38095	17.6709	7.96168e-07	1.27857	up	--	--	--	--	PREDICTED: uncharacterized protein LOC101244747 [Solanum lycopersicum]
c28929.graph_c0	1.02417	3.10577	9.72442e-05	1.59354	up	Carbohydrate transport and metabolism	Molecular Function: beta-galactosidase activity (GO:0004565);; Biological Process: carbohydrate metabolic process (GO:0005975);; Cellular Component: chloroplast (GO:0009507);; Molecular Function: beta-D-fucosidase activity (GO:0033907);; Molecular Function: glucan endo-1,3-beta-D-glucosidase activity (GO:0042973);; Molecular Function: metal ion binding (GO:0046872);; Cellular Component: apoplast …	K01188|0.0|rcu:RCOM_1621030|beta-glucosidase, putative (EC:3.2.1.21)	Beta-glucosidase 40 OS=Arabidopsis thaliana GN=BGLU40 PE=2 SV=1	PREDICTED: beta-glucosidase 40-like [Solanum lycopersicum]
c34146.graph_c0	9.17453	18.9819	4.45281e-06	1.07261	up	Coenzyme transport and metabolism	Molecular Function: dimethylallyltranstransferase activity (GO:0004161);; Biological Process: isoprenoid biosynthetic process (GO:0008299);;	K13789|5e-92|rcu:RCOM_0082580|geranyl geranyl pyrophosphate synthase, putative (EC:2.5.1.29)	Heterodimeric geranylgeranyl pyrophosphate synthase small subunit, chloroplastic OS=Arabidopsis thaliana GN=GGR PE=1 SV=2	geranyl diphosphate synthase small subunit [Antirrhinum majus]
c29488.graph_c0	1.93812	4.87025	0.000778872	1.33473	up	--	Molecular Function: sequence-specific DNA binding transcription factor activity (GO:0003700);; Biological Process: regulation of transcription, DNA-templated (GO:0006355);; Molecular Function: sequence-specific DNA binding (GO:0043565);;	--	Probable WRKY transcription factor 31 OS=Arabidopsis thaliana GN=WRKY31 PE=2 SV=1	WRKY transcription factor [Picrorhiza kurrooa]
c19412.graph_c0	10.8819	23.311	1.65058e-08	1.12459	up	Coenzyme transport and metabolism	Molecular Function: dimethylallyltranstransferase activity (GO:0004161);; Molecular Function: nucleocytoplasmic transporter activity (GO:0005487);; Molecular Function: protein binding (GO:0005515);; Cellular Component: nuclear envelope (GO:0005635);; Cellular Component: mitochondrion (GO:0005739);; Cellular Component: chloroplast thylakoid membrane (GO:0009535);; Biological Process: negative regu…	K12501|0.0|pop:POPTR_819322|hypothetical protein	Homogentisate phytyltransferase 2, chloroplastic OS=Arabidopsis thaliana GN=HPT2 PE=2 SV=1	PREDICTED: homogentisate phytyltransferase 2, chloroplastic-like [Solanum lycopersicum]
c44428.graph_c0	0.312368	2.66269	3.61349e-10	2.96667	up	Defense mechanisms	Cellular Component: plasma membrane (GO:0005886);; Biological Process: drug transmembrane transport (GO:0006855);; Biological Process: fruit ripening (GO:0009835);; Molecular Function: drug transmembrane transporter activity (GO:0015238);; Molecular Function: antiporter activity (GO:0015297);;	--	Protein TRANSPARENT TESTA 12 OS=Arabidopsis thaliana GN=TT12 PE=2 SV=1	MATE efflux family protein [Theobroma cacao]
c37188.graph_c0	0.840098	3.85796	8.59931e-08	2.16434	up	--	Biological Process: cellular process (GO:0009987);;	--	Root phototropism protein 3 OS=Arabidopsis thaliana GN=RPT3 PE=1 SV=2	Phototropic-responsive NPH3 family protein [Theobroma cacao]
c31637.graph_c0	2.7188	6.33336	4.14183e-05	1.23622	up	--	--	--	--	predicted protein [Populus trichocarpa]
c14431.graph_c0	10.4297	34.8365	0	1.76521	up	--	Biological Process: sulfur amino acid metabolic process (GO:0000096);; Molecular Function: protein binding (GO:0005515);; Biological Process: pentose-phosphate shunt (GO:0006098);; Biological Process: rRNA processing (GO:0006364);; Biological Process: glycine catabolic process (GO:0006546);; Biological Process: unsaturated fatty acid biosynthetic process (GO:0006636);; Biological Process: phospha…	K09839|0.0|vvi:100257865|hypothetical protein LOC100257865	Violaxanthin de-epoxidase, chloroplastic OS=Nicotiana tabacum GN=VDE1 PE=2 SV=1	violaxanthin de-epoxidase [Coffea arabica]
c39867.graph_c0	6.14519	16.8677	2.57572e-14	1.48033	up	--	Molecular Function: DNA binding (GO:0003677);;	--	Heat stress transcription factor A-3 OS=Arabidopsis thaliana GN=HSFA3 PE=2 SV=2	unnamed protein product [Vitis vinifera]
c25484.graph_c0	15.6643	34.4476	3.55479e-09	1.16234	up	--	Cellular Component: plasma membrane (GO:0005886);; Cellular Component: chloroplast thylakoid membrane (GO:0009535);; Biological Process: regulation of proton transport (GO:0010155);; Biological Process: NADH dehydrogenase complex (plastoquinone) assembly (GO:0010258);; Cellular Component: NAD(P)H dehydrogenase complex (plastoquinone) (GO:0010598);; Molecular Function: oxidoreductase activity, act…	--	NAD(P)H-quinone oxidoreductase subunit O OS=Gloeobacter violaceus (strain PCC 7421) GN=ndhO PE=3 SV=1	hypothetical protein PRUPE_ppa012640mg [Prunus persica]
c14631.graph_c0	39.7675	79.5838	2.79375e-07	1.02704	up	--	Cellular Component: plant-type vacuole (GO:0000325);; Biological Process: cell morphogenesis (GO:0000902);; Molecular Function: protease binding (GO:0002020);; Molecular Function: DNA photolyase activity (GO:0003913);; Molecular Function: ATP binding (GO:0005524);; Cellular Component: cell wall (GO:0005618);; Cellular Component: vacuolar membrane (GO:0005774);; Cellular Component: Golgi apparatus…	K02145|4e-28|sbi:SORBI_10g026440|hypothetical protein	V-type proton ATPase catalytic subunit A OS=Brassica napus PE=2 SV=1	vacuolar H+-ATPase catalytic subunit [Allium cepa]
c31146.graph_c1	9.53473	22.2794	2.56828e-05	1.24111	up	--	Molecular Function: nucleotide binding (GO:0000166);; Molecular Function: 3-beta-hydroxy-delta5-steroid dehydrogenase activity (GO:0003854);; Cellular Component: cytosol (GO:0005829);; Biological Process: steroid metabolic process (GO:0008202);; Biological Process: response to wounding (GO:0009611);; Biological Process: xylem and phloem pattern formation (GO:0010051);; Biological Process: cellula…	--	3-oxo-Delta(4,5)-steroid 5-beta-reductase OS=Arabidopsis thaliana GN=VEP1 PE=1 SV=1	putative progesterone 5 beta-reductase [Nicotiana tabacum]
c31761.graph_c0	7.05734	17.3961	3.25155e-05	1.3147	up	--	--	--	--	hypothetical protein MTR_067s0027 [Medicago truncatula]
c38255.graph_c0	3.80593	8.60644	1.49567e-05	1.19616	up	General function prediction only	Biological Process: metabolic process (GO:0008152);; Cellular Component: plastid (GO:0009536);; Molecular Function: hydrolase activity (GO:0016787);;	--	Uncharacterized hydrolase YugF OS=Bacillus subtilis (strain 168) GN=yugF PE=3 SV=1	PREDICTED: LOW QUALITY PROTEIN: haloalkane dehalogenase-like, partial [Cucumis sativus]
c38491.graph_c0	3.22954	17.9769	0	2.48475	up	--	Cellular Component: mitochondrion (GO:0005739);;	--	Pentatricopeptide repeat-containing protein At2g35130 OS=Arabidopsis thaliana GN=At2g35130 PE=2 SV=1	Tetratricopeptide repeat-like superfamily protein [Theobroma cacao]
c42066.graph_c0	2.56327	12.3432	0	2.26781	up	--	--	--	Ethylene-responsive transcription factor ERF017 OS=Arabidopsis thaliana GN=ERF017 PE=2 SV=1	dehydration-responsive element binding protein 3 [Glycine max]
c30428.graph_c0	1.05138	3.04461	0.00270011	1.51973	up	Signal transduction mechanisms	Molecular Function: phosphoprotein phosphatase activity (GO:0004721);; Biological Process: post-embryonic development (GO:0009791);; Biological Process: single-organism cellular process (GO:0044763);; Biological Process: organ development (GO:0048513);; Biological Process: response to stimulus (GO:0050896);;	--	Probable protein phosphatase 2C 25 OS=Arabidopsis thaliana GN=At2g30020 PE=1 SV=1	PREDICTED: probable protein phosphatase 2C 30-like [Solanum lycopersicum]
c1979.graph_c0	0.211045	1.74832	2.61541e-06	2.8568	up	--	Biological Process: defense response (GO:0006952);; Molecular Function: ligase activity (GO:0016874);; Biological Process: detection of molecule of fungal origin (GO:0032491);; Biological Process: macromolecule localization (GO:0033036);; Biological Process: cellular response to stress (GO:0033554);; Biological Process: regulation of programmed cell death (GO:0043067);; Biological Process: cellul…	--	U-box domain-containing protein 21 OS=Arabidopsis thaliana GN=PUB21 PE=2 SV=1	immediate-early fungal elicitor protein CMPG1 [Petroselinum crispum]
c34546.graph_c0	1.62661	4.42657	0.00566894	1.43449	up	--	Cellular Component: mitochondrion (GO:0005739);; Cellular Component: endoplasmic reticulum (GO:0005783);; Biological Process: response to auxin (GO:0009733);; Biological Process: regulation of cell proliferation (GO:0042127);; Biological Process: positive regulation of organ growth (GO:0046622);; Biological Process: regulation of developmental growth (GO:0048638);;	--	--	Auxin-regulated gene involved in organ size [Theobroma cacao]
c39741.graph_c0	2.9248	6.52794	0.00126372	1.17179	up	Carbohydrate transport and metabolism	Molecular Function: xylulokinase activity (GO:0004856);; Biological Process: carbohydrate metabolic process (GO:0005975);; Cellular Component: chloroplast (GO:0009507);; Biological Process: phosphorylation (GO:0016310);;	--	Xylulose kinase OS=Bacillus subtilis (strain 168) GN=xylB PE=3 SV=2	unnamed protein product [Vitis vinifera]
c42048.graph_c0	4.95457	22.3732	0	2.18427	up	--	--	--	Dirigent protein 11 OS=Arabidopsis thaliana GN=DIR11 PE=2 SV=1	hypothetical protein M569_08466 [Genlisea aurea]
c28682.graph_c0	0.26672	4.0348	0.000180047	3.34143	up	General function prediction only	Molecular Function: triglyceride lipase activity (GO:0004806);; Biological Process: lipid catabolic process (GO:0016042);; Molecular Function: retinyl-palmitate esterase activity (GO:0050253);;	--	Triacylglycerol lipase 2 OS=Arabidopsis thaliana GN=LIP2 PE=2 SV=1	predicted protein [Populus trichocarpa]
c36357.graph_c0	1.94011	7.01475	4.14789e-06	1.83733	up	--	--	--	--	predicted protein [Populus trichocarpa]
c34515.graph_c0	22.1183	47.3942	3.42736e-09	1.12558	up	--	Biological Process: protein folding (GO:0006457);; Biological Process: protein transport (GO:0015031);;	--	Trigger factor OS=Microcystis aeruginosa (strain NIES-843) GN=tig PE=3 SV=1	PREDICTED: trigger factor-like [Solanum lycopersicum]
c32145.graph_c1	1.62714	4.33684	0.00382804	1.40864	up	--	Cellular Component: nuclear ubiquitin ligase complex (GO:0000152);; Molecular Function: ubiquitin-protein ligase activity (GO:0004842);; Molecular Function: protein binding (GO:0005515);; Biological Process: DNA repair (GO:0006281);; Biological Process: shade avoidance (GO:0009641);; Biological Process: skotomorphogenesis (GO:0009647);; Biological Process: entrainment of circadian clock (GO:00096…	K10143|1e-152|vvi:100246063|hypothetical protein LOC100246063	E3 ubiquitin-protein ligase COP1 OS=Arabidopsis thaliana GN=COP1 PE=1 SV=2	unnamed protein product [Vitis vinifera]
c1109.graph_c0	0.270431	1.70456	0.000888347	2.47262	up	--	Biological Process: single-organism process (GO:0044699);;	--	--	hypothetical protein PRUPE_ppa005769mg [Prunus persica]
c16955.graph_c0	0	1.29329	0.000234773	4.39017	up	--	--	--	Putative ribonuclease H protein At1g65750 OS=Arabidopsis thaliana GN=At1g65750 PE=3 SV=1	F1L3.4 [Arabidopsis thaliana]
c31994.graph_c1	2.09822	11.336	4.79616e-14	2.41462	up	--	Cellular Component: extracellular region (GO:0005576);; Cellular Component: vacuole (GO:0005773);; Biological Process: protein targeting to membrane (GO:0006612);; Biological Process: positive regulation of flavonoid biosynthetic process (GO:0009963);; Biological Process: regulation of plant-type hypersensitive response (GO:0010363);; Molecular Function: lipase activity (GO:0016298);;	--	GDSL esterase/lipase At1g28570 OS=Arabidopsis thaliana GN=At1g28570 PE=2 SV=1	predicted protein [Populus trichocarpa]
c28266.graph_c0	1.0358	4.67153	1.35171e-08	2.1466	up	--	Cellular Component: nucleus (GO:0005634);; Cellular Component: cytoplasm (GO:0005737);; Biological Process: protein targeting to membrane (GO:0006612);; Biological Process: response to water deprivation (GO:0009414);; Biological Process: response to wounding (GO:0009611);; Biological Process: response to fungus (GO:0009620);; Biological Process: jasmonic acid biosynthetic process (GO:0009695);; B…	--	Jasmonate O-methyltransferase OS=Arabidopsis thaliana GN=JMT PE=1 SV=3	Jasmonic acid carboxyl methyltransferase [Theobroma cacao]
c16571.graph_c0	1.66911	5.69239	1.58687e-06	1.76224	up	--	Molecular Function: methyltransferase activity (GO:0008168);; Biological Process: methylation (GO:0032259);;	--	Salicylate O-methyltransferase OS=Clarkia breweri GN=SAMT PE=1 SV=1	S-adenosyl-L-methionine:salicylic acid methyltransferase [Antirrhinum majus]
c21390.graph_c0	0.180339	2.98789	2.22059e-08	3.6403	up	--	Molecular Function: binding (GO:0005488);;	K09422|1e-76|vvi:100233135|MYB14	Myb-related protein Myb4 OS=Oryza sativa subsp. japonica GN=MYB4 PE=2 SV=2	hypothetical protein PRUPE_ppa020190mg [Prunus persica]
c38689.graph_c0	1.20106	4.0141	4.14452e-08	1.74242	up	Signal transduction mechanisms	Molecular Function: nucleotide binding (GO:0000166);; Cellular Component: chloroplast (GO:0009507);; Molecular Function: transferase activity (GO:0016740);;	--	Extensin OS=Zea mays GN=HRGP PE=2 SV=1	PREDICTED: myosin heavy chain kinase B-like [Solanum lycopersicum]
c32806.graph_c0	0.519501	3.18092	6.71965e-10	2.55327	up	--	Molecular Function: nucleic acid binding (GO:0003676);;	--	Transposon TX1 uncharacterized 149 kDa protein OS=Xenopus laevis PE=4 SV=1	hypothetical protein M569_11401 [Genlisea aurea]
c22940.graph_c0	2.40512	6.89252	0.00688826	1.50132	up	--	Molecular Function: iron ion binding (GO:0005506);; Cellular Component: cytoplasmic membrane-bounded vesicle (GO:0016023);; Biological Process: secretion by cell (GO:0032940);; Biological Process: gibberellin catabolic process (GO:0045487);; Molecular Function: C-19 gibberellin 2-beta-dioxygenase activity (GO:0052634);; Biological Process: oxidation-reduction process (GO:0055114);;	--	Gibberellin 2-beta-dioxygenase 1 OS=Pisum sativum GN=GA2OX1 PE=1 SV=1	gibberellin 2-oxidase [Populus trichocarpa]
c27777.graph_c0	4.35797	11.6338	2.18048e-05	1.42484	up	--	--	--	--	Uncharacterized protein TCM_015608 [Theobroma cacao]
c36410.graph_c2	8.48995	17.6294	0.000101837	1.07521	up	--	Molecular Function: carboxypeptidase activity (GO:0004180);; Molecular Function: transferase activity (GO:0016740);;	--	Serine carboxypeptidase-like 18 OS=Arabidopsis thaliana GN=SCPL18 PE=2 SV=2	glucose acyltransferase [Solanum berthaultii]
c15785.graph_c0	12.7686	29.4813	7.92282e-11	1.23275	up	Cell wall/membrane/envelope biogenesis	Cellular Component: plastid chromosome (GO:0009508);; Cellular Component: chloroplast thylakoid membrane (GO:0009535);; Cellular Component: chloroplast envelope (GO:0009941);;	--	--	PREDICTED: uncharacterized protein LOC101263249 [Solanum lycopersicum]
c42224.graph_c0	5.47097	13.2588	2.43998e-05	1.29169	up	Function unknown	Cellular Component: extracellular region (GO:0005576);;	--	Basic form of pathogenesis-related protein 1 OS=Nicotiana tabacum PE=3 SV=1	PREDICTED: basic form of pathogenesis-related protein 1 [Vitis vinifera]
c38079.graph_c0	4.29178	17.5502	0	2.04962	up	Energy production and conversion	--	--	Chaperone protein DnaJ OS=Dictyoglomus thermophilum (strain ATCC 35947 / DSM 3960 / H-6-12) GN=dnaJ PE=3 SV=1	PREDICTED: uncharacterized protein LOC100247733 [Vitis vinifera]
c22224.graph_c0	0.647919	8.66373	0	3.5898	up	--	Biological Process: response to stimulus (GO:0050896);;	--	Cucumber peeling cupredoxin OS=Cucumis sativus PE=1 SV=3	dicyanin precursor [Solanum lycopersicum]
c24388.graph_c0	3.98052	9.53596	9.83172e-09	1.28263	up	--	Cellular Component: chloroplast (GO:0009507);;	--	--	conserved hypothetical protein [Ricinus communis]
c14041.graph_c0	2.95915	7.43196	0.00284666	1.33026	up	--	--	--	--	hypothetical protein M569_13633 [Genlisea aurea]
c13689.graph_c0	2.33798	8.51445	1.2337e-11	1.871	up	--	--	--	WAT1-related protein At3g28050 OS=Arabidopsis thaliana GN=At3g28050 PE=2 SV=1	hypothetical protein M569_11314, partial [Genlisea aurea]
c41444.graph_c0	19.7171	40.0768	1.38266e-07	1.04936	up	Posttranslational modification, protein turnover, chaperones	Biological Process: protein peptidyl-prolyl isomerization (GO:0000413);; Molecular Function: peptidyl-prolyl cis-trans isomerase activity (GO:0003755);; Molecular Function: FK506 binding (GO:0005528);; Biological Process: protein folding (GO:0006457);; Cellular Component: chloroplast thylakoid membrane (GO:0009535);;	--	Peptidyl-prolyl cis-trans isomerase FKBP17-2, chloroplastic OS=Arabidopsis thaliana GN=FKBP17-2 PE=1 SV=1	predicted protein [Populus trichocarpa]
c29587.graph_c0	2.16112	6.91569	1.329e-08	1.68478	up	--	--	--	--	PREDICTED: uncharacterized protein LOC100854716 [Vitis vinifera]
c40663.graph_c0	68.2614	142.846	1.01075e-10	1.09309	up	--	Molecular Function: ACP phosphopantetheine attachment site binding involved in fatty acid biosynthetic process (GO:0000036);; Biological Process: rRNA processing (GO:0006364);; Biological Process: fatty acid biosynthetic process (GO:0006633);; Cellular Component: chloroplast stroma (GO:0009570);; Biological Process: systemic acquired resistance (GO:0009627);; Biological Process: response to blue …	--	Acyl carrier protein 4, chloroplastic OS=Arabidopsis thaliana GN=ACP4 PE=1 SV=1	PREDICTED: acyl carrier protein 4, chloroplastic-like isoform X2 [Cicer arietinum]
c37771.graph_c0	3.26916	10.1415	3.39925e-09	1.64373	up	--	Molecular Function: catalytic activity (GO:0003824);; Biological Process: proteolysis (GO:0006508);; Cellular Component: nuclear part (GO:0044428);; Cellular Component: chloroplast part (GO:0044434);;	--	Cysteine proteinase RD21a OS=Arabidopsis thaliana GN=RD21A PE=1 SV=1	PREDICTED: cysteine proteinase RD21a-like [Glycine max]
c39056.graph_c0	12.4874	27.5483	5.99706e-06	1.16247	up	--	Cellular Component: nucleus (GO:0005634);; Biological Process: protein targeting to chloroplast (GO:0045036);; Biological Process: positive regulation of transcription, DNA-templated (GO:0045893);;	--	Protein CHLOROPLAST IMPORT APPARATUS 2 OS=Arabidopsis thaliana GN=CIA2 PE=2 SV=1	PREDICTED: protein CHLOROPLAST IMPORT APPARATUS 2-like [Solanum lycopersicum]
c35508.graph_c0	20.6822	58.8675	0	1.53553	up	--	Molecular Function: catalytic activity (GO:0003824);; Biological Process: pentose-phosphate shunt (GO:0006098);; Cellular Component: chloroplast thylakoid membrane (GO:0009535);; Biological Process: photosynthetic electron transport in photosystem I (GO:0009773);; Biological Process: myo-inositol hexakisphosphate biosynthetic process (GO:0010264);; Cellular Component: NAD(P)H dehydrogenase comple…	--	--	PREDICTED: uncharacterized protein LOC101263383 [Solanum lycopersicum]
c37972.graph_c0	2.02516	4.55673	6.0194e-05	1.18764	up	Inorganic ion transport and metabolism	Molecular Function: manganese ion transmembrane transporter activity (GO:0005384);; Cellular Component: vacuolar membrane (GO:0005774);; Cellular Component: endomembrane system (GO:0012505);; Molecular Function: potassium ion transmembrane transporter activity (GO:0015079);; Molecular Function: sodium ion transmembrane transporter activity (GO:0015081);; Molecular Function: cation:cation antiport…	--	Cation/calcium exchanger 4 OS=Arabidopsis thaliana GN=CCX4 PE=2 SV=1	PREDICTED: cation/calcium exchanger 4 [Vitis vinifera]
c18063.graph_c0	30.8964	68.0344	7.61501e-11	1.16555	up	--	Biological Process: respiratory burst involved in defense response (GO:0002679);; Molecular Function: chitinase activity (GO:0004568);; Cellular Component: extracellular region (GO:0005576);; Cellular Component: cell wall (GO:0005618);; Biological Process: carbohydrate metabolic process (GO:0005975);; Biological Process: chitin catabolic process (GO:0006032);; Molecular Function: chitin binding (…	K01183|1e-148|vvi:100245803|hypothetical protein LOC100245803	Chitinase 6 OS=Oryza sativa subsp. japonica GN=Cht6 PE=2 SV=1	class IV chitinase [Nicotiana tabacum]
c38652.graph_c0	14.6101	43.271	3.55271e-15	1.58839	up	--	Biological Process: transcription, DNA-templated (GO:0006351);; Biological Process: response to stress (GO:0006950);; Biological Process: response to abiotic stimulus (GO:0009628);;	--	Dehydration-responsive element-binding protein 1C OS=Arabidopsis thaliana GN=DREB1C PE=2 SV=2	hypothetical protein PRUPE_ppa010935mg [Prunus persica]
c27723.graph_c0	1.73457	9.23074	0	2.40701	up	Secondary metabolites biosynthesis, transport and catabolism	Molecular Function: iron ion binding (GO:0005506);; Molecular Function: electron carrier activity (GO:0009055);; Molecular Function: alkane 1-monooxygenase activity (GO:0018685);; Molecular Function: heme binding (GO:0020037);; Biological Process: oxidation-reduction process (GO:0055114);; Molecular Function: aromatase activity (GO:0070330);;	--	Cytochrome P450 94A1 OS=Vicia sativa GN=CYP94A1 PE=2 SV=2	PREDICTED: cytochrome P450 94A1 [Vitis vinifera]
c44153.graph_c0	0.502541	3.80109	2.21512e-05	2.72862	up	General function prediction only	Molecular Function: oxidoreductase activity, acting on paired donors, with incorporation or reduction of molecular oxygen, 2-oxoglutarate as one donor, and incorporation of one atom each of oxygen into both donors (GO:0016706);; Biological Process: single-organism metabolic process (GO:0044710);;	--	Leucoanthocyanidin dioxygenase OS=Malus domestica GN=ANS PE=2 SV=1	predicted protein [Populus trichocarpa]
c14788.graph_c0	27.0614	58.3869	7.19331e-11	1.13661	up	--	Cellular Component: plastid (GO:0009536);;	--	--	PREDICTED: uncharacterized protein LOC101205319 [Cucumis sativus]
c32681.graph_c0	4.11892	15.6597	1.18638e-12	1.93271	up	--	Molecular Function: fatty-acyl-CoA reductase (alcohol-forming) activity (GO:0080019);;	--	Alcohol-forming fatty acyl-CoA reductase OS=Simmondsia chinensis PE=1 SV=1	PREDICTED: fatty acyl-CoA reductase 3-like [Solanum lycopersicum]
c34863.graph_c0	15.3994	33.5366	1.54554e-07	1.14681	up	--	Biological Process: MAPK cascade (GO:0000165);; Biological Process: response to reactive oxygen species (GO:0000302);; Biological Process: protein targeting to membrane (GO:0006612);; Biological Process: response to cold (GO:0009409);; Biological Process: response to wounding (GO:0009611);; Biological Process: abscisic acid-activated signaling pathway (GO:0009738);; Biological Process: systemic a…	--	Late embryogenesis abundant protein Lea5 OS=Citrus sinensis GN=LEA5 PE=2 SV=1	senescence-associated protein [Arabidopsis thaliana]
c33778.graph_c0	3.52359	35.2181	0	3.33599	up	Secondary metabolites biosynthesis, transport and catabolism	Molecular Function: binding (GO:0005488);; Molecular Function: oxidoreductase activity (GO:0016491);;	--	Secologanin synthase OS=Catharanthus roseus GN=CYP72A1 PE=2 SV=1	cytochrome P450 [Populus trichocarpa]
c32431.graph_c0	0.777845	10.2059	1.33227e-14	3.53913	up	--	--	--	Metallothionein-like protein 2 OS=Cicer arietinum PE=3 SV=2	metallothionein type 2a-FL [Elaeis guineensis]
c40752.graph_c0	42.6924	89.8172	2.29474e-09	1.09972	up	--	Cellular Component: extracellular region (GO:0005576);; Biological Process: protein targeting to membrane (GO:0006612);; Biological Process: lipid transport (GO:0006869);; Molecular Function: lipid binding (GO:0008289);; Biological Process: positive regulation of flavonoid biosynthetic process (GO:0009963);; Biological Process: regulation of plant-type hypersensitive response (GO:0010363);;	--	Probable non-specific lipid-transfer protein AKCS9 OS=Vigna unguiculata PE=2 SV=1	PREDICTED: probable non-specific lipid-transfer protein AKCS9-like [Cicer arietinum]
c22775.graph_c1	7.37237	14.7693	0.000114284	1.02487	up	--	Molecular Function: NAD+ kinase activity (GO:0003951);; Molecular Function: diacylglycerol kinase activity (GO:0004143);; Cellular Component: plasma membrane (GO:0005886);; Biological Process: protein kinase C-activating G-protein coupled receptor signaling pathway (GO:0007205);; Biological Process: pollen tube growth (GO:0009860);; Biological Process: phosphorylation (GO:0016310);; Biological Pr…	K00901|1e-109|vvi:100241035|hypothetical protein LOC100241035	Diacylglycerol kinase 4 OS=Arabidopsis thaliana GN=DGK4 PE=2 SV=1	PREDICTED: diacylglycerol kinase zeta-like [Solanum lycopersicum]
c17470.graph_c0	0.708805	2.43282	0.00223767	1.74051	up	General function prediction only	--	--	--	PREDICTED: uncharacterized protein LOC101251330 [Solanum lycopersicum]
c29234.graph_c2	7.22683	14.9078	0.000936438	1.06343	up	--	Molecular Function: DNA binding (GO:0003677);; Molecular Function: sequence-specific DNA binding transcription factor activity (GO:0003700);; Cellular Component: nucleus (GO:0005634);; Biological Process: regulation of transcription, DNA-templated (GO:0006355);; Molecular Function: protein dimerization activity (GO:0046983);;	--	MADS-box protein SOC1 OS=Arabidopsis thaliana GN=SOC1 PE=1 SV=1	putative MADS-box transcription factor DEFH68 [Antirrhinum majus]
c23452.graph_c0	3.91757	21.5834	0	2.47373	up	Carbohydrate transport and metabolism	Biological Process: maltose metabolic process (GO:0000023);; Biological Process: response to hypoxia (GO:0001666);; Molecular Function: fructose-bisphosphate aldolase activity (GO:0004332);; Biological Process: glycolysis (GO:0006096);; Biological Process: pentose-phosphate shunt (GO:0006098);; Cellular Component: chloroplast (GO:0009507);; Biological Process: anthocyanin-containing compound bios…	K01623|0.0|pop:POPTR_708143|fructose-bisphosphate aldolase (EC:4.1.2.13)	Fructose-bisphosphate aldolase, cytoplasmic isozyme 1 OS=Pisum sativum PE=1 SV=1	PREDICTED: fructose-bisphosphate aldolase, cytoplasmic isozyme 1-like [Glycine max]
c42532.graph_c0	1.59256	10.6691	1.11564e-07	2.63872	up	--	--	--	UDP-glycosyltransferase 85A7 OS=Arabidopsis thaliana GN=UGT85A7 PE=2 SV=1	hypothetical protein M569_14056, partial [Genlisea aurea]
c28646.graph_c0	101.818	201.064	1.80427e-09	1.00989	up	General function prediction only	Molecular Function: RNA binding (GO:0003723);; Cellular Component: chloroplast thylakoid membrane (GO:0009535);; Cellular Component: chloroplast stroma (GO:0009570);; Biological Process: photosynthetic electron transport in photosystem I (GO:0009773);; Cellular Component: chloroplast envelope (GO:0009941);; Biological Process: isopentenyl diphosphate biosynthetic process, methylerythritol 4-phosp…	--	30S ribosomal protein 2, chloroplastic OS=Spinacia oleracea GN=PSRP2 PE=1 SV=1	PREDICTED: 30S ribosomal protein 2, chloroplastic-like [Glycine max]
c25687.graph_c0	0	3.30084	0	6.0577	up	--	--	--	--	PREDICTED: uncharacterized protein LOC101314079 [Fragaria vesca subsp. vesca]
c42462.graph_c0	2.78052	7.69139	7.83003e-06	1.4753	up	--	Molecular Function: peroxidase activity (GO:0004601);; Cellular Component: chloroplast stroma (GO:0009570);; Molecular Function: peroxiredoxin activity (GO:0051920);; Biological Process: oxidation-reduction process (GO:0055114);;	--	Thioredoxin-like protein AAED1, chloroplastic OS=Arabidopsis thaliana GN=At2g37240 PE=2 SV=2	hypothetical protein PRUPE_ppa010087mg [Prunus persica]
c37425.graph_c0	10.1852	24.0826	6.06568e-09	1.26445	up	--	Cellular Component: extracellular region (GO:0005576);; Cellular Component: nucleus (GO:0005634);; Cellular Component: chloroplast (GO:0009507);; Biological Process: thylakoid membrane organization (GO:0010027);; Molecular Function: antioxidant activity (GO:0016209);; Molecular Function: oxidoreductase activity (GO:0016491);; Biological Process: oxidation-reduction process (GO:0055114);;	--	--	V(D)J recombination-activating protein 2 isoform 1 [Theobroma cacao]
c25062.graph_c2	6.47658	41.6391	0	2.70156	up	--	Molecular Function: transferase activity, transferring acyl groups other than amino-acyl groups (GO:0016747);;	--	Pelargonidin 3-O-(6-caffeoylglucoside) 5-O-(6-O-malonylglucoside) 4&apos;&apos;&apos;-malonyltransferase OS=Salvia splendens PE=1 SV=1	predicted protein [Populus trichocarpa]
c42177.graph_c0	1.00608	7.24736	4.32987e-15	2.79993	up	--	Biological Process: transcription, DNA-templated (GO:0006351);; Biological Process: response to chitin (GO:0010200);;	--	Ethylene-responsive transcription factor ERF017 OS=Arabidopsis thaliana GN=ERF017 PE=2 SV=1	PREDICTED: ethylene-responsive transcription factor ERF017-like [Solanum lycopersicum]
c36176.graph_c0	14.9877	29.859	1.73745e-07	1.02085	up	--	Biological Process: circadian rhythm (GO:0007623);;	--	Transcription factor LUX OS=Arabidopsis thaliana GN=LUX PE=1 SV=1	NbPCL1 [Nicotiana benthamiana]
c32109.graph_c0	345.408	690.956	4.49247e-10	1.02877	up	--	Biological Process: response to stimulus (GO:0050896);;	--	Calvin cycle protein CP12-2, chloroplastic OS=Arabidopsis thaliana GN=CP12-2 PE=1 SV=1	hypothetical protein PRUPE_ppa013259mg [Prunus persica]
c43280.graph_c0	0.719152	4.81782	0.00231001	2.52001	up	--	Cellular Component: extracellular region (GO:0005576);; Cellular Component: plasma membrane (GO:0005886);; Biological Process: defense response (GO:0006952);; Cellular Component: plant-type cell wall (GO:0009505);; Molecular Function: peptidase inhibitor activity (GO:0030414);;	--	Defensin-like protein 2 OS=Arabidopsis thaliana GN=PDF2.2 PE=2 SV=1	putative gamma-thionin [Castanea sativa]
c32337.graph_c0	2.82283	16.1223	2.44249e-15	2.49421	up	--	--	--	--	PREDICTED: uncharacterized protein LOC101250420 [Solanum lycopersicum]
c38579.graph_c0	31.647	73.1213	3.93019e-14	1.23591	up	--	Cellular Component: chloroplast stroma (GO:0009570);; Cellular Component: thylakoid (GO:0009579);; Biological Process: chlororespiration (GO:0010478);;	--	--	PREDICTED: uncharacterized protein LOC101260209 isoform 1 [Solanum lycopersicum]
c32308.graph_c0	8.07853	24.8211	0	1.64314	up	--	Biological Process: regulation of immune system process (GO:0002682);; Biological Process: immune response (GO:0006955);; Biological Process: response to bacterium (GO:0009617);; Biological Process: response to salicylic acid (GO:0009751);; Biological Process: hormone-mediated signaling pathway (GO:0009755);; Biological Process: aromatic compound biosynthetic process (GO:0019438);; Biological Pro…	--	Probable WRKY transcription factor 40 OS=Arabidopsis thaliana GN=WRKY40 PE=1 SV=1	transcriptional factor WRKY I [Boea hygrometrica]
c28981.graph_c0	34.7212	86.5473	0	1.3456	up	Posttranslational modification, protein turnover, chaperones	Biological Process: maltose metabolic process (GO:0000023);; Biological Process: protein peptidyl-prolyl isomerization (GO:0000413);; Molecular Function: peptidyl-prolyl cis-trans isomerase activity (GO:0003755);; Biological Process: protein folding (GO:0006457);; Cellular Component: chloroplast stroma (GO:0009570);; Biological Process: chloroplast relocation (GO:0009902);; Cellular Component: ch…	--	Trigger factor-like protein TIG OS=Arabidopsis thaliana GN=TIG PE=2 SV=1	PREDICTED: trigger factor isoform 1 [Vitis vinifera]
c31247.graph_c0	14.1131	28.3209	5.27968e-06	1.02944	up	--	Molecular Function: metal ion binding (GO:0046872);;	--	--	PREDICTED: uncharacterized protein LOC100258685 [Vitis vinifera]
c29624.graph_c1	16.0948	45.5765	2.26286e-11	1.521	up	--	Biological Process: maltose metabolic process (GO:0000023);; Biological Process: MAPK cascade (GO:0000165);; Biological Process: sucrose biosynthetic process (GO:0005986);; Biological Process: pentose-phosphate shunt (GO:0006098);; Biological Process: rRNA processing (GO:0006364);; Biological Process: protein targeting to membrane (GO:0006612);; Biological Process: response to cold (GO:0009409);;…	K01100|2e-81|pop:POPTR_567316|sedoheptulose-bisphosphatase (EC:3.1.3.37)	Sedoheptulose-1,7-bisphosphatase, chloroplastic OS=Spinacia oleracea PE=2 SV=1	chloroplast sedoheptulose-1,7-bisphosphatase [Solanum lycopersicum]
c29367.graph_c0	0.313963	4.91909	9.73183e-05	3.39025	up	--	Biological Process: drug transmembrane transport (GO:0006855);; Molecular Function: drug transmembrane transporter activity (GO:0015238);; Molecular Function: antiporter activity (GO:0015297);; Cellular Component: membrane (GO:0016020);; Cellular Component: cell part (GO:0044464);;	--	Protein TRANSPARENT TESTA 12 OS=Arabidopsis thaliana GN=TT12 PE=2 SV=1	PREDICTED: protein TRANSPARENT TESTA 12-like [Fragaria vesca subsp. vesca]
c42890.graph_c0	0.466609	4.66373	1.89896e-11	3.17501	up	--	--	--	Dehydration-responsive element-binding protein 1F OS=Oryza sativa subsp. japonica GN=DREB1F PE=2 SV=1	CBF/DREB3 transcription factor [Vitis amurensis]
c44795.graph_c0	0.106071	2.75071	0.000337378	3.67679	up	--	--	--	Auxin-repressed 12.5 kDa protein OS=Fragaria ananassa PE=2 SV=1	auxin-repressed protein [Elaeis guineensis]
c16558.graph_c0	0	4.50873	0.0018905	4.17919	up	--	--	--	--	AP2 domain class transcription factor [Malus domestica]
c37987.graph_c0	8.51947	27.0616	0	1.6903	up	--	--	--	Zinc finger protein CONSTANS-LIKE 16 OS=Arabidopsis thaliana GN=COL16 PE=2 SV=2	PREDICTED: zinc finger protein CONSTANS-LIKE 16 [Vitis vinifera]
c18872.graph_c0	7.28043	20.5322	2.73108e-10	1.51364	up	--	--	--	--	PREDICTED: arabinogalactan peptide 20-like [Solanum lycopersicum]
c26254.graph_c0	6.85149	22.0536	0	1.71031	up	--	Biological Process: Group II intron splicing (GO:0000373);; Cellular Component: chloroplast (GO:0009507);;	--	CRS2-associated factor 2, chloroplastic OS=Arabidopsis thaliana GN=At1g23400 PE=2 SV=1	hypothetical protein M569_15368, partial [Genlisea aurea]
c36505.graph_c0	28.5191	58.672	5.56421e-06	1.06449	up	--	Cellular Component: intracellular organelle (GO:0043229);; Cellular Component: cytoplasmic part (GO:0044444);;	--	50S ribosomal protein 5, chloroplastic OS=Pisum sativum GN=PSRP5 PE=2 SV=1	PREDICTED: 50S ribosomal protein 5, chloroplastic-like [Solanum lycopersicum]
c18307.graph_c1	0.483374	5.91943	2.6426e-05	3.21554	up	--	Biological Process: metabolic process (GO:0008152);; Molecular Function: transferase activity, transferring hexosyl groups (GO:0016758);;	--	UDP-glycosyltransferase 83A1 OS=Arabidopsis thaliana GN=UGT83A1 PE=2 SV=1	PREDICTED: UDP-glycosyltransferase 85A1 [Vitis vinifera]
c31880.graph_c1	4.20776	8.67518	0.00103405	1.06253	up	Carbohydrate transport and metabolism	Biological Process: carbohydrate metabolic process (GO:0005975);; Molecular Function: beta-glucosidase activity (GO:0008422);;	--	Lysosomal beta glucosidase OS=Dictyostelium discoideum GN=gluA PE=1 SV=2	hydrolase, hydrolyzing O-glycosyl compounds, putative [Ricinus communis]
c13730.graph_c0	2.38791	4.91303	0.00369785	1.05768	up	General function prediction only	Molecular Function: oxidoreductase activity, acting on paired donors, with incorporation or reduction of molecular oxygen, 2-oxoglutarate as one donor, and incorporation of one atom each of oxygen into both donors (GO:0016706);; Biological Process: single-organism metabolic process (GO:0044710);;	--	Gibberellin 2-beta-dioxygenase 8 OS=Arabidopsis thaliana GN=GA2OX8 PE=1 SV=2	gibberellin 2-oxidase 1 [Nicotiana sylvestris]
c15502.graph_c0	1.01415	3.86763	0.000204048	1.88975	up	--	--	--	--	Uncharacterized protein TCM_014522 [Theobroma cacao]
c36394.graph_c0	2.53448	13.8322	0	2.45396	up	--	Biological Process: lipid metabolic process (GO:0006629);; Biological Process: stomatal complex morphogenesis (GO:0010103);; Biological Process: mRNA modification (GO:0016556);;	--	GDSL esterase/lipase At4g28780 OS=Arabidopsis thaliana GN=At4g28780 PE=2 SV=1	PREDICTED: GDSL esterase/lipase At5g33370-like [Solanum lycopersicum]
c33643.graph_c0	1.99012	7.01216	4.43788e-05	1.79483	up	--	Cellular Component: mitochondrion (GO:0005739);; Biological Process: response to cytokinin (GO:0009735);;	--	--	hypothetical protein CARUB_v10010742mg [Capsella rubella]
c43199.graph_c0	0.83826	4.03479	0.00015698	2.18179	up	Carbohydrate transport and metabolism	Molecular Function: hydrolase activity, hydrolyzing O-glycosyl compounds (GO:0004553);; Biological Process: metabolic process (GO:0008152);;	--	Beta-glucosidase 10 OS=Oryza sativa subsp. japonica GN=BGLU10 PE=2 SV=1	unknown [Lotus japonicus]
c34825.graph_c0	130.701	333.989	0	1.3819	up	--	Biological Process: flavonoid biosynthetic process (GO:0009813);; Molecular Function: naringenin-chalcone synthase activity (GO:0016210);;	--	Chalcone synthase OS=Antirrhinum majus GN=CHS PE=3 SV=1	RecName: Full=Chalcone synthase; AltName: Full=Naringenin-chalcone synthase
c40932.graph_c0	41.5149	96.0068	3.61933e-14	1.23719	up	General function prediction only	Biological Process: pentose-phosphate shunt (GO:0006098);; Cellular Component: chloroplast stroma (GO:0009570);; Cellular Component: chloroplast envelope (GO:0009941);; Biological Process: thylakoid membrane organization (GO:0010027);; Biological Process: stomatal complex morphogenesis (GO:0010103);; Biological Process: carotenoid biosynthetic process (GO:0016117);; Molecular Function: hydrolase …	--	Protein CbbY OS=Rhodobacter capsulatus GN=cbbY PE=3 SV=1	PREDICTED: protein CbbY-like [Solanum lycopersicum]
c31356.graph_c0	6.74994	13.7474	2.00641e-07	1.05204	up	--	--	--	F-box protein At2g16365 OS=Arabidopsis thaliana GN=At2g16365 PE=2 SV=2	PREDICTED: F-box protein At2g16365-like [Vitis vinifera]
c34214.graph_c0	2.38526	9.8492	3.88578e-15	2.05204	up	--	Molecular Function: magnesium ion binding (GO:0000287);; Molecular Function: sesquiterpene synthase activity (GO:0010334);; Biological Process: sesquiterpene biosynthetic process (GO:0051762);;	--	Alpha-farnesene synthase OS=Ricinus communis GN=TPS7 PE=1 SV=2	terpene synthase 2 [Olea europaea]
c24728.graph_c0	5.05379	10.7212	6.78816e-05	1.10551	up	--	Molecular Function: hydrolase activity, hydrolyzing O-glycosyl compounds (GO:0004553);; Cellular Component: extracellular region (GO:0005576);; Biological Process: carbohydrate metabolic process (GO:0005975);; Biological Process: defense response (GO:0006952);; Cellular Component: cell part (GO:0044464);; Biological Process: response to other organism (GO:0051707);;	--	Glucan endo-1,3-beta-glucosidase, acidic isoform PR-Q&apos; OS=Nicotiana tabacum PE=1 SV=1	beta-1,3-glucanase [Olea europaea]
c32283.graph_c0	5.31073	10.8508	1.29051e-05	1.05425	up	Secondary metabolites biosynthesis, transport and catabolism	Molecular Function: iron ion binding (GO:0005506);; Cellular Component: endoplasmic reticulum membrane (GO:0005789);; Molecular Function: electron carrier activity (GO:0009055);; Cellular Component: integral component of membrane (GO:0016021);; Biological Process: monoterpenoid biosynthetic process (GO:0016099);; Molecular Function: oxidoreductase activity, acting on paired donors, with incorpora…	--	Geraniol 8-hydroxylase OS=Swertia mussotii GN=CYP76B10 PE=1 SV=1	geraniol 10-hydroxylase [Picrorhiza kurrooa]
c41246.graph_c0	13.5956	28.634	3.73743e-09	1.1011	up	--	Molecular Function: aspartic-type endopeptidase activity (GO:0004190);; Cellular Component: extracellular region (GO:0005576);; Cellular Component: Golgi apparatus (GO:0005794);; Biological Process: proteolysis (GO:0006508);; Biological Process: response to light stimulus (GO:0009416);; Biological Process: sterol biosynthetic process (GO:0016126);; Biological Process: response to L-ascorbic acid …	--	Aspartic proteinase PCS1 OS=Arabidopsis thaliana GN=PCS1 PE=2 SV=1	PREDICTED: aspartic proteinase PCS1-like [Solanum lycopersicum]
c40184.graph_c0	4.11731	11.3245	1.23994e-09	1.47755	up	--	--	--	--	unnamed protein product [Vitis vinifera]
c41120.graph_c0	27.5694	55.5052	3.31062e-10	1.03789	up	Carbohydrate transport and metabolism	Molecular Function: protein histidine kinase activity (GO:0004673);; Molecular Function: ATP binding (GO:0005524);; Cellular Component: mitochondrion (GO:0005739);; Biological Process: starch catabolic process (GO:0005983);; Biological Process: circadian rhythm (GO:0007623);; Cellular Component: chloroplast stroma (GO:0009570);; Biological Process: response to symbiotic fungus (GO:0009610);; Biol…	--	Alpha-glucan water dikinase, chloroplastic OS=Solanum tuberosum GN=R1 PE=1 SV=2	alpha-glucan water dikinase [Solanum tuberosum]
c35952.graph_c0	3.87138	8.32491	7.50629e-05	1.12432	up	--	Biological Process: primary metabolic process (GO:0044238);; Biological Process: cellular macromolecule metabolic process (GO:0044260);; Biological Process: single-organism process (GO:0044699);;	--	Protein IQ-DOMAIN 1 OS=Arabidopsis thaliana GN=IQD1 PE=1 SV=1	PREDICTED: protein IQ-DOMAIN 1 [Vitis vinifera]
c17793.graph_c0	7.18003	16.748	2.89847e-07	1.24296	up	--	Biological Process: regulation of transcription, DNA-templated (GO:0006355);; Biological Process: chloroplast organization (GO:0009658);; Cellular Component: chloroplast nucleoid (GO:0042644);;	--	--	PREDICTED: uncharacterized protein LOC101244147 [Solanum lycopersicum]
c37853.graph_c0	6.55629	13.8567	1.7046e-08	1.10549	up	--	--	--	--	hypothetical protein M569_05764, partial [Genlisea aurea]
c28142.graph_c0	7.04538	44.4374	0	2.6748	up	--	--	--	--	PREDICTED: uncharacterized protein LOC101245485 [Solanum lycopersicum]
c27515.graph_c1	13.2663	28.0722	3.45401e-05	1.10262	up	--	Biological Process: maltose metabolic process (GO:0000023);; Molecular Function: serine-type endopeptidase activity (GO:0004252);; Biological Process: proteolysis (GO:0006508);; Cellular Component: chloroplast thylakoid (GO:0009534);; Cellular Component: chloroplastic endopeptidase Clp complex (GO:0009840);; Cellular Component: chloroplast envelope (GO:0009941);; Biological Process: starch biosyn…	--	ATP-dependent Clp protease proteolytic subunit 5, chloroplastic OS=Arabidopsis thaliana GN=CLPP5 PE=1 SV=1	predicted protein [Populus trichocarpa]
c31318.graph_c0	1.14208	3.52589	0.000179076	1.61531	up	--	Cellular Component: chloroplast (GO:0009507);; Biological Process: chloroplast RNA processing (GO:0031425);;	--	Pentatricopeptide repeat-containing protein At1g08070 OS=Arabidopsis thaliana GN=PCMP-H12 PE=2 SV=1	PREDICTED: pentatricopeptide repeat-containing protein At1g08070-like [Vitis vinifera]
c16694.graph_c0	26.304	64.3219	3.44169e-15	1.31711	up	Inorganic ion transport and metabolism	Molecular Function: superoxide dismutase activity (GO:0004784);; Biological Process: superoxide metabolic process (GO:0006801);; Molecular Function: metal ion binding (GO:0046872);; Biological Process: oxidation-reduction process (GO:0055114);;	K04564|1e-155|vvi:100258067|hypothetical protein LOC100258067	Superoxide dismutase [Fe] 2, chloroplastic OS=Arabidopsis thaliana GN=FSD2 PE=1 SV=1	Fe-superoxide dismutase [Haberlea rhodopensis]
c42476.graph_c0	0.214625	6.41616	0	4.47733	up	--	Cellular Component: extracellular region (GO:0005576);; Cellular Component: vacuole (GO:0005773);; Biological Process: defense response to bacterium, incompatible interaction (GO:0009816);; Biological Process: defense response to fungus, incompatible interaction (GO:0009817);;	--	Thaumatin-like protein OS=Olea europaea PE=1 SV=1	RecName: Full=Thaumatin-like protein; AltName: Allergen=Ole e 13; Flags: Precursor
c18901.graph_c0	14.1775	35.0155	0.000113671	1.31531	up	Carbohydrate transport and metabolism	Biological Process: alkaloid biosynthetic process (GO:0009821);; Molecular Function: raucaffricine beta-glucosidase activity (GO:0050247);; Molecular Function: vomilenine glucosyltransferase activity (GO:0050506);;	--	Strictosidine-O-beta-D-glucosidase OS=Rauvolfia serpentina GN=SGR1 PE=1 SV=1	putative GH1 familly glucosidase [Ipomoea nil]
c42097.graph_c0	5.65216	23.0091	4.12126e-12	2.02496	up	--	Cellular Component: photosynthetic membrane (GO:0034357);;	--	--	hypothetical protein PRUPE_ppa013406mg [Prunus persica]
c35552.graph_c0	2.65809	6.91586	5.84181e-07	1.39462	up	Secondary metabolites biosynthesis, transport and catabolism	Molecular Function: iron ion binding (GO:0005506);; Molecular Function: electron carrier activity (GO:0009055);; Cellular Component: chloroplast (GO:0009507);; Molecular Function: oxygen binding (GO:0019825);; Molecular Function: heme binding (GO:0020037);; Biological Process: oxidation-reduction process (GO:0055114);; Molecular Function: aromatase activity (GO:0070330);;	--	Cytochrome P450 94A1 OS=Vicia sativa GN=CYP94A1 PE=2 SV=2	PREDICTED: cytochrome P450 94A2-like isoform 1 [Solanum lycopersicum]
c31447.graph_c0	0.604806	2.02933	0.00124958	1.71519	up	Coenzyme transport and metabolism	Molecular Function: GTP cyclohydrolase II activity (GO:0003935);; Molecular Function: GTP binding (GO:0005525);; Molecular Function: 3,4-dihydroxy-2-butanone-4-phosphate synthase activity (GO:0008686);; Biological Process: riboflavin biosynthetic process (GO:0009231);; Cellular Component: chloroplast (GO:0009507);; Biological Process: mRNA modification (GO:0016556);; Molecular Function: metal ion…	K14652|0.0|vvi:100267389|hypothetical protein LOC100267389	Monofunctional riboflavin biosynthesis protein RIBA 3, chloroplastic OS=Arabidopsis thaliana GN=RIBA3 PE=1 SV=1	DHBP synthase RibB-like alpha/beta domain,GTP cyclohydrolase II [Theobroma cacao]
c34836.graph_c0	12.5487	63.9223	0	2.37389	up	Secondary metabolites biosynthesis, transport and catabolism	Molecular Function: monooxygenase activity (GO:0004497);; Molecular Function: oxidoreductase activity, acting on paired donors, with incorporation or reduction of molecular oxygen (GO:0016705);; Molecular Function: metal ion binding (GO:0046872);;	--	Cytochrome P450 76A2 OS=Solanum melongena GN=CYP76A2 PE=2 SV=1	PREDICTED: cytochrome P450 76A2 [Vitis vinifera]
c43613.graph_c0	0.109017	4.24069	1.4801e-07	4.24142	up	--	Molecular Function: nucleotide binding (GO:0000166);; Molecular Function: alcohol dehydrogenase (NAD) activity (GO:0004022);; Cellular Component: Golgi apparatus (GO:0005794);; Cellular Component: cytosol (GO:0005829);; Cellular Component: plasma membrane (GO:0005886);; Cellular Component: plasmodesma (GO:0009506);; Biological Process: para-aminobenzoic acid metabolic process (GO:0046482);; Molec…	--	Cinnamoyl-CoA reductase 1 OS=Arabidopsis thaliana GN=CCR1 PE=1 SV=1	alcohol dehydrogenase-like protein, partial [Genlisea aurea]
c39803.graph_c0	1.49126	5.21775	5.07383e-12	1.81668	up	Defense mechanisms	Molecular Function: nucleotide binding (GO:0000166);; Cellular Component: membrane (GO:0016020);; Molecular Function: ATPase activity (GO:0016887);;	--	ABC transporter G family member 22 OS=Arabidopsis thaliana GN=ABCG22 PE=1 SV=1	PREDICTED: ABC transporter G family member 22-like [Vitis vinifera]
c26512.graph_c0	4.94718	14.2686	1.20892e-12	1.5484	up	--	--	--	Probable WRKY transcription factor 53 OS=Arabidopsis thaliana GN=WRKY53 PE=1 SV=1	predicted protein [Populus trichocarpa]
c37923.graph_c0	1.40074	3.57549	3.93932e-06	1.36586	up	--	Molecular Function: transferase activity, transferring phosphorus-containing groups (GO:0016772);;	--	Putative serine/threonine-protein kinase receptor OS=Brassica oleracea var. acephala GN=SRK6 PE=2 SV=2	PREDICTED: G-type lectin S-receptor-like serine/threonine-protein kinase At4g27290-like [Solanum lycopersicum]
c33320.graph_c0	531.347	1751.04	0	1.7491	up	Carbohydrate transport and metabolism	Biological Process: alkaloid biosynthetic process (GO:0009821);; Molecular Function: raucaffricine beta-glucosidase activity (GO:0050247);; Molecular Function: vomilenine glucosyltransferase activity (GO:0050506);;	--	Beta-glucosidase 24 OS=Oryza sativa subsp. japonica GN=BGLU24 PE=2 SV=1	beta-glucosidase [Olea europaea subsp. europaea]
c17298.graph_c0	16.2725	50.4532	0	1.65943	up	--	Cellular Component: plasma membrane (GO:0005886);; Cellular Component: chloroplast (GO:0009507);;	--	Putative nuclease HARBI1 OS=Homo sapiens GN=HARBI1 PE=1 SV=1	salt responsive protein 2 [Solanum lycopersicum]
c28011.graph_c0	10.9248	25.2816	6.60516e-10	1.23515	up	--	--	--	Zinc finger protein ZAT10 OS=Arabidopsis thaliana GN=ZAT10 PE=2 SV=1	zinc finger DNA-binding protein [Catharanthus roseus]
c38941.graph_c1	5.46228	31.2324	0	2.52981	up	--	Molecular Function: magnesium ion binding (GO:0000287);; Molecular Function: sesquiterpene synthase activity (GO:0010334);; Biological Process: farnesyl diphosphate catabolic process (GO:0045339);; Biological Process: beta-caryophyllene biosynthetic process (GO:1901937);;	--	(-)-germacrene D synthase OS=Vitis vinifera GN=VIT_19s0014g04930 PE=1 SV=1	hypothetical protein VITISV_030783 [Vitis vinifera]
c13778.graph_c0	1.39851	8.43717	9.82319e-08	2.51098	up	--	Cellular Component: endoplasmic reticulum membrane (GO:0005789);; Molecular Function: nitrate reductase (NADH) activity (GO:0009703);; Cellular Component: integral component of membrane (GO:0016021);; Biological Process: sterol biosynthetic process (GO:0016126);; Biological Process: pentacyclic triterpenoid biosynthetic process (GO:0019745);; Molecular Function: heme binding (GO:0020037);; Biolog…	--	Cytochrome b5 OS=Nicotiana tabacum PE=2 SV=1	Cytochrome B5, n4,ATCB5-B,CB5-B [Theobroma cacao]
c38821.graph_c0	8.90104	20.0869	5.36432e-09	1.19871	up	--	Molecular Function: aspartic-type endopeptidase activity (GO:0004190);; Biological Process: proteolysis (GO:0006508);;	--	Basic 7S globulin OS=Glycine max GN=BG PE=1 SV=2	PREDICTED: basic 7S globulin [Vitis vinifera]
c17239.graph_c0	0.350713	3.2843	0.00288274	2.84177	up	--	Molecular Function: inorganic diphosphatase activity (GO:0004427);; Cellular Component: vacuolar membrane (GO:0005774);; Molecular Function: hydrogen-translocating pyrophosphatase activity (GO:0009678);; Biological Process: proton transport (GO:0015992);; Cellular Component: integral component of membrane (GO:0016021);; Cellular Component: cytoplasmic membrane-bounded vesicle (GO:0016023);; Molec…	K01507|1e-82|rcu:RCOM_0003350|Pyrophosphate-energized vacuolar membrane proton pump, putative (EC:1.3.1.74)	Pyrophosphate-energized vacuolar membrane proton pump OS=Vigna radiata var. radiata PE=1 SV=3	PPase [Hevea brasiliensis]
c41801.graph_c0	6.12138	12.8229	4.54389e-06	1.09004	up	--	--	--	F-box protein At4g18380 OS=Arabidopsis thaliana GN=At4g18380 PE=2 SV=1	f-box family protein [Populus trichocarpa]
c22755.graph_c0	80.3895	188.113	3.59712e-14	1.25396	up	General function prediction only	Biological Process: coumarin biosynthetic process (GO:0009805);; Biological Process: lignin biosynthetic process (GO:0009809);; Biological Process: methylation (GO:0032259);; Molecular Function: caffeoyl-CoA O-methyltransferase activity (GO:0042409);; Biological Process: response to cadmium ion (GO:0046686);; Molecular Function: metal ion binding (GO:0046872);;	--	Caffeoyl-CoA O-methyltransferase OS=Populus tremuloides PE=2 SV=1	caffeoyl-CoA-O-methyltransferase [Broussonetia papyrifera]
c37327.graph_c0	1.96028	5.54457	0.000264746	1.49727	up	Posttranslational modification, protein turnover, chaperones	Molecular Function: electron carrier activity (GO:0009055);; Cellular Component: chloroplast (GO:0009507);; Molecular Function: protein disulfide oxidoreductase activity (GO:0015035);; Biological Process: cell redox homeostasis (GO:0045454);;	--	--	PREDICTED: uncharacterized protein LOC101297355 [Fragaria vesca subsp. vesca]
c4565.graph_c0	0.486928	1.51997	0.00920158	1.60978	up	--	--	--	Probable methyltransferase PMT12 OS=Arabidopsis thaliana GN=At5g06050 PE=2 SV=1	hypothetical protein PRUPE_ppa002527mg [Prunus persica]
c13796.graph_c0	1.48497	8.02283	2.56963e-06	2.35438	up	--	Molecular Function: binding (GO:0005488);; Biological Process: metabolic process (GO:0008152);;	--	Transcription factor bHLH19 OS=Arabidopsis thaliana GN=BHLH19 PE=2 SV=1	hypothetical protein M569_16384, partial [Genlisea aurea]
c30697.graph_c0	1.98792	7.68328	1.07203e-12	1.95546	up	--	--	--	Probable WRKY transcription factor 53 OS=Arabidopsis thaliana GN=WRKY53 PE=1 SV=1	PREDICTED: probable WRKY transcription factor 46 [Vitis vinifera]
c18950.graph_c0	21.5649	45.354	3.24492e-09	1.09914	up	General function prediction only	Molecular Function: RNA binding (GO:0003723);; Biological Process: rRNA processing (GO:0006364);; Cellular Component: chloroplast stroma (GO:0009570);; Cellular Component: thylakoid (GO:0009579);; Biological Process: chloroplast relocation (GO:0009902);; Biological Process: thylakoid membrane organization (GO:0010027);; Biological Process: photosynthesis (GO:0015979);; Biological Process: chlorop…	--	33 kDa ribonucleoprotein, chloroplastic OS=Nicotiana sylvestris PE=1 SV=1	PREDICTED: 33 kDa ribonucleoprotein, chloroplastic-like [Solanum lycopersicum]
c32492.graph_c0	0.559488	1.69273	0.0071455	1.5714	up	--	Molecular Function: calmodulin binding (GO:0005516);; Cellular Component: nucleus (GO:0005634);;	--	--	PREDICTED: uncharacterized protein LOC101245483 [Solanum lycopersicum]
c38448.graph_c0	33.8321	94.8398	0	1.51511	up	Cell wall/membrane/envelope biogenesis	Biological Process: sucrose metabolic process (GO:0005985);; Biological Process: biosynthetic process (GO:0009058);; Molecular Function: sucrose synthase activity (GO:0016157);;	K00695|0.0|vvi:100249279|hypothetical protein LOC100249279	Sucrose synthase OS=Solanum tuberosum PE=3 SV=1	sucrose synthase 1 [Orobanche ramosa]
c31880.graph_c0	4.40996	9.19387	0.000851603	1.07826	up	Carbohydrate transport and metabolism	Biological Process: carbohydrate metabolic process (GO:0005975);; Molecular Function: beta-glucosidase activity (GO:0008422);;	--	Periplasmic beta-glucosidase OS=Salmonella typhimurium (strain LT2 / SGSC1412 / ATCC 700720) GN=bglX PE=3 SV=2	PREDICTED: lysosomal beta glucosidase-like [Vitis vinifera]
c38719.graph_c0	3.18624	7.10256	2.25057e-06	1.17783	up	--	Biological Process: signal transduction (GO:0007165);; Biological Process: defense response, incompatible interaction (GO:0009814);; Biological Process: response to organic substance (GO:0010033);; Biological Process: regulation of defense response (GO:0031347);; Biological Process: cellular metabolic process (GO:0044237);; Biological Process: response to oxygen-containing compound (GO:1901700);;	--	--	PREDICTED: uncharacterized protein LOC101267354 [Solanum lycopersicum]
c24688.graph_c0	29.0428	78.3587	0	1.45999	up	Carbohydrate transport and metabolism	Molecular Function: protein binding (GO:0005515);; Molecular Function: glycogen phosphorylase activity (GO:0008184);; Biological Process: response to cold (GO:0009409);; Biological Process: response to water deprivation (GO:0009414);; Cellular Component: amyloplast (GO:0009501);; Cellular Component: chloroplast stroma (GO:0009570);; Biological Process: starch biosynthetic process (GO:0019252);; M…	--	Alpha-1,4 glucan phosphorylase L-2 isozyme, chloroplastic/amyloplastic OS=Solanum tuberosum GN=STP-1 PE=1 SV=1	RecName: Full=Alpha-1,4 glucan phosphorylase L-2 isozyme, chloroplastic/amyloplastic; AltName: Full=Starch phosphorylase L-2; Flags: Precursor
c15770.graph_c0	0.186251	3.82376	3.84725e-07	3.76819	up	--	--	--	Mannose-specific lectin OS=Galanthus nivalis PE=1 SV=1	tuber lectin 1 [Dioscorea polystachya]
c14257.graph_c0	148.358	329.619	7.42739e-14	1.18026	up	--	Molecular Function: DNA binding (GO:0003677);; Cellular Component: intracellular (GO:0005622);; Molecular Function: zinc ion binding (GO:0008270);;	--	Zinc finger protein CONSTANS-LIKE 10 OS=Arabidopsis thaliana GN=COL10 PE=1 SV=1	unnamed protein product [Vitis vinifera]
c42238.graph_c0	6.53169	13.641	6.25205e-05	1.08369	up	--	Biological Process: pentose-phosphate shunt (GO:0006098);; Biological Process: rRNA processing (GO:0006364);; Cellular Component: chloroplast thylakoid lumen (GO:0009543);; Biological Process: embryo development ending in seed dormancy (GO:0009793);; Biological Process: thylakoid membrane organization (GO:0010027);; Biological Process: vegetative to reproductive phase transition of meristem (GO:0…	--	Thylakoid lumenal 15.0 kDa protein 2, chloroplastic OS=Arabidopsis thaliana GN=At5g52970 PE=1 SV=2	PREDICTED: thylakoid lumenal 15.0 kDa protein 2, chloroplastic-like [Solanum lycopersicum]
c37162.graph_c0	72.1168	172.717	1.11022e-16	1.28845	up	Coenzyme transport and metabolism	Biological Process: maltose metabolic process (GO:0000023);; Biological Process: pentose-phosphate shunt (GO:0006098);; Biological Process: thiamine biosynthetic process (GO:0009228);; Cellular Component: chloroplast stroma (GO:0009570);; Biological Process: response to vitamin B1 (GO:0010266);; Biological Process: detection of bacterium (GO:0016045);; Biological Process: starch biosynthetic proc…	K03147|0.0|ath:AT2G29630|THIC	Phosphomethylpyrimidine synthase, chloroplastic OS=Arabidopsis thaliana GN=THIC PE=1 SV=1	PREDICTED: phosphomethylpyrimidine synthase, chloroplastic-like [Solanum lycopersicum]
c39547.graph_c0	14.9528	30.5591	6.32572e-09	1.05823	up	--	Molecular Function: phosphatidylinositol phospholipase C activity (GO:0004435);; Molecular Function: signal transducer activity (GO:0004871);; Molecular Function: calcium ion binding (GO:0005509);; Cellular Component: plasma membrane (GO:0005886);; Biological Process: lipid metabolic process (GO:0006629);; Biological Process: intracellular signal transduction (GO:0035556);;	K05857|0.0|rcu:RCOM_0339640|1-phosphatidylinositol-4,5-bisphosphate phosphodiesterase, putative (EC:3.1.4.11)	Phosphoinositide phospholipase C 2 OS=Arabidopsis thaliana GN=PLC2 PE=1 SV=1	phospholipase C [Torenia fournieri]
c40603.graph_c0	77.5763	156.66	5.52714e-10	1.04202	up	--	Biological Process: maltose metabolic process (GO:0000023);; Biological Process: pentose-phosphate shunt (GO:0006098);; Cellular Component: chloroplast stroma (GO:0009570);; Biological Process: chloroplast relocation (GO:0009902);; Biological Process: thylakoid membrane organization (GO:0010027);; Biological Process: starch biosynthetic process (GO:0019252);; Biological Process: isopentenyl dipho…	--	--	PREDICTED: uncharacterized protein LOC101492820 [Cicer arietinum]
c16108.graph_c0	14.3884	28.4311	9.14754e-06	1.00735	up	Signal transduction mechanisms	Biological Process: circadian rhythm (GO:0007623);; Cellular Component: chloroplast inner membrane (GO:0009706);; Cellular Component: integral component of membrane (GO:0016021);;	--	Transmembrane protein DDB_G0269096 OS=Dictyostelium discoideum GN=DDB_G0269096 PE=4 SV=1	PREDICTED: uncharacterized protein LOC101244759 [Solanum lycopersicum]
c46502.graph_c0	0.138747	2.17385	9.73183e-05	3.39025	up	--	Biological Process: very long-chain fatty acid metabolic process (GO:0000038);; Cellular Component: nucleus (GO:0005634);; Cellular Component: mitochondrion (GO:0005739);; Cellular Component: endoplasmic reticulum (GO:0005783);; Biological Process: lipid biosynthetic process (GO:0008610);; Molecular Function: formate dehydrogenase (NAD+) activity (GO:0008863);; Biological Process: response to col…	K00122|1e-173|vvi:100261093|hypothetical protein LOC100261093	Formate dehydrogenase, mitochondrial OS=Solanum tuberosum GN=FDH1 PE=1 SV=2	Formate dehydrogenase [Theobroma cacao]
c27723.graph_c1	1.21906	6.68026	1.27872e-07	2.38926	up	--	Molecular Function: iron ion binding (GO:0005506);; Molecular Function: electron carrier activity (GO:0009055);; Molecular Function: alkane 1-monooxygenase activity (GO:0018685);; Molecular Function: heme binding (GO:0020037);; Biological Process: oxidation-reduction process (GO:0055114);; Molecular Function: aromatase activity (GO:0070330);;	--	Cytochrome P450 (Fragment) OS=Helianthus annuus PE=1 SV=1	PREDICTED: cytochrome P450 94A2-like [Glycine max]
c27331.graph_c0	15.2584	31.9621	3.288e-07	1.09154	up	--	Molecular Function: hydrolase activity (GO:0016787);;	--	GDSL esterase/lipase At5g03980 OS=Arabidopsis thaliana GN=At5g03980 PE=2 SV=1	PREDICTED: acetylajmalan esterase-like isoform 2 [Solanum lycopersicum]
c34791.graph_c2	2.03497	6.49186	0.00148118	1.64905	up	--	Cellular Component: Golgi apparatus (GO:0005794);; Molecular Function: transferase activity, transferring glycosyl groups (GO:0016757);;	--	--	PREDICTED: uncharacterized protein At1g04910-like [Solanum lycopersicum]
c18068.graph_c0	16.9392	37.6237	1.00203e-08	1.17597	up	--	Biological Process: maltose metabolic process (GO:0000023);; Cellular Component: chloroplast thylakoid membrane (GO:0009535);; Biological Process: starch biosynthetic process (GO:0019252);; Biological Process: positive regulation of catalytic activity (GO:0043085);;	--	--	PREDICTED: uncharacterized protein LOC101244833 [Solanum lycopersicum]
c31072.graph_c0	4.10797	11.2357	0.00116395	1.44754	up	--	--	--	--	predicted protein [Populus trichocarpa]
c30384.graph_c0	0	1.68346	3.41032e-08	5.05876	up	Cell cycle control, cell division, chromosome partitioning	Cellular Component: intracellular non-membrane-bounded organelle (GO:0043232);; Biological Process: single-organism cellular process (GO:0044763);;	K06669|5e-40|pop:POPTR_804027|CPE903	Structural maintenance of chromosomes protein 3 OS=Arabidopsis thaliana GN=SMC3 PE=2 SV=1	hypothetical protein M569_07108, partial [Genlisea aurea]
c29526.graph_c0	6.96209	24.1949	2.97207e-13	1.80972	up	--	--	--	Protein NIM1-INTERACTING 2 OS=Arabidopsis thaliana GN=NIMIN-2 PE=1 SV=1	Uncharacterized protein TCM_011816 [Theobroma cacao]
c36639.graph_c0	13.3582	27.5334	1.33573e-07	1.06913	up	--	Molecular Function: sulfotransferase activity (GO:0008146);;	--	Cytosolic sulfotransferase 15 OS=Arabidopsis thaliana GN=SOT15 PE=1 SV=1	Flavonol 3-sulfotransferase, putative [Ricinus communis]
c37112.graph_c0	3.37647	8.45212	1.43746e-08	1.34405	up	--	Biological Process: defense response (GO:0006952);; Biological Process: signal transduction (GO:0007165);; Biological Process: metabolic process (GO:0008152);; Biological Process: response to organic substance (GO:0010033);;	--	--	PREDICTED: uncharacterized protein LOC101253593 [Solanum lycopersicum]
c26958.graph_c0	3.12481	7.69085	0.00577621	1.30071	up	Posttranslational modification, protein turnover, chaperones	Cellular Component: nucleus (GO:0005634);; Cellular Component: cytoplasm (GO:0005737);; Molecular Function: electron carrier activity (GO:0009055);; Molecular Function: protein disulfide oxidoreductase activity (GO:0015035);; Biological Process: cell redox homeostasis (GO:0045454);; Biological Process: stamen morphogenesis (GO:0048448);; Biological Process: petal formation (GO:0048451);; Biologic…	--	Glutaredoxin-C3 OS=Oryza sativa subsp. japonica GN=GRXC3 PE=2 SV=1	Thioredoxin superfamily protein [Theobroma cacao]
c24832.graph_c0	3.4339	16.2978	0	2.25878	up	--	--	--	--	unnamed protein product [Vitis vinifera]
c2847.graph_c0	0.293633	1.37488	0.00259065	2.1195	up	--	--	--	Putative ribonuclease H protein At1g65750 OS=Arabidopsis thaliana GN=At1g65750 PE=3 SV=1	hypothetical protein M569_13371 [Genlisea aurea]
c22329.graph_c0	3.19553	8.40701	1.736e-09	1.41515	up	--	Biological Process: response to light stimulus (GO:0009416);; Cellular Component: chloroplast (GO:0009507);; Biological Process: response to salt stress (GO:0009651);; Biological Process: response to auxin (GO:0009733);; Biological Process: response to abscisic acid (GO:0009737);;	K14487|0.0|rcu:RCOM_1176020|Indole-3-acetic acid-amido synthetase GH3.5, putative	Probable indole-3-acetic acid-amido synthetase GH3.5 OS=Oryza sativa subsp. japonica GN=GH3.5 PE=2 SV=1	Indole-3-acetic acid-amido synthetase GH3.5, putative [Ricinus communis]
c40621.graph_c0	14.5511	30.6912	2.83627e-05	1.09826	up	Translation, ribosomal structure and biogenesis	--	K02358|3e-11|pop:POPTR_414537|hypothetical protein	Elongation factor Tu, chloroplastic OS=Nicotiana tabacum GN=TUFA PE=3 SV=1	chloroplast elongation factor TuB [Nicotiana benthamiana]
c36360.graph_c0	194.345	418.431	1.2309e-12	1.13477	up	General function prediction only	Biological Process: circadian rhythm (GO:0007623);; Molecular Function: poly(U) RNA binding (GO:0008266);; Biological Process: RNA splicing (GO:0008380);; Cellular Component: chloroplast thylakoid membrane (GO:0009535);; Cellular Component: chloroplast stroma (GO:0009570);; Biological Process: cold acclimation (GO:0009631);; Biological Process: salicylic acid biosynthetic process (GO:0009697);; B…	--	29 kDa ribonucleoprotein, chloroplastic OS=Arabidopsis thaliana GN=RBP29 PE=1 SV=2	chloroplast RNA-binding protein 29 [Arabidopsis thaliana]
c24803.graph_c0	3.79721	8.47074	3.74182e-05	1.17623	up	Inorganic ion transport and metabolism	Molecular Function: nucleotide binding (GO:0000166);; Molecular Function: monooxygenase activity (GO:0004497);; Molecular Function: coenzyme binding (GO:0050662);;	--	Probable flavin-containing monooxygenase 1 OS=Arabidopsis thaliana GN=FMO1 PE=2 SV=1	hypothetical protein PRUPE_ppa004370mg [Prunus persica]
c34154.graph_c0	0.381216	1.85363	0.00425439	2.15667	up	--	Biological Process: lipid metabolic process (GO:0006629);; Molecular Function: hydrolase activity, acting on ester bonds (GO:0016788);;	--	GDSL esterase/lipase At2g30310 OS=Arabidopsis thaliana GN=At2g30310 PE=2 SV=1	PREDICTED: GDSL esterase/lipase At2g30310-like [Solanum lycopersicum]
c40717.graph_c0	63.486	148.274	1.95399e-14	1.25138	up	--	Molecular Function: structural constituent of ribosome (GO:0003735);; Cellular Component: ribosome (GO:0005840);; Biological Process: translation (GO:0006412);; Cellular Component: chloroplast (GO:0009507);;	--	30S ribosomal protein 3, chloroplastic OS=Spinacia oleracea GN=PSRP3 PE=1 SV=1	Ribosomal protein PSRP-3/Ycf65 [Theobroma cacao]
c39168.graph_c1	99.1454	201.91	2.52373e-10	1.0542	up	--	--	--	--	hypothetical protein M569_03189, partial [Genlisea aurea]
c15352.graph_c0	0.743096	3.51287	1.34754e-06	2.19031	up	--	--	--	Putative ribonuclease H protein At1g65750 OS=Arabidopsis thaliana GN=At1g65750 PE=3 SV=1	hypothetical protein PRUPE_ppa024472mg, partial [Prunus persica]
c32345.graph_c0	6.5961	15.385	6.95181e-10	1.24625	up	Posttranslational modification, protein turnover, chaperones	Biological Process: protein peptidyl-prolyl isomerization (GO:0000413);; Molecular Function: peptidyl-prolyl cis-trans isomerase activity (GO:0003755);; Biological Process: protein folding (GO:0006457);; Biological Process: response to heat (GO:0009408);; Biological Process: cellular response to stress (GO:0033554);;	--	70 kDa peptidyl-prolyl isomerase OS=Triticum aestivum GN=FKBP70 PE=1 SV=1	PREDICTED: LOW QUALITY PROTEIN: 70 kDa peptidyl-prolyl isomerase-like [Vitis vinifera]
c39092.graph_c0	22.4701	62.8708	0	1.51121	up	--	Molecular Function: sequence-specific DNA binding transcription factor activity (GO:0003700);; Molecular Function: peptide-aspartate beta-dioxygenase activity (GO:0004597);; Cellular Component: nucleus (GO:0005634);; Biological Process: regulation of transcription, DNA-templated (GO:0006355);; Molecular Function: methyltransferase activity (GO:0008168);; Biological Process: methylation (GO:003225…	--	Lysine-specific demethylase 8 OS=Homo sapiens GN=KDM8 PE=1 SV=1	predicted protein [Populus trichocarpa]
c32845.graph_c0	0.382726	4.87068	0	3.53787	up	--	Cellular Component: ubiquitin ligase complex (GO:0000151);; Molecular Function: ubiquitin-protein ligase activity (GO:0004842);; Biological Process: protein ubiquitination (GO:0016567);;	--	E3 ubiquitin-protein ligase PUB23 OS=Arabidopsis thaliana GN=PUB23 PE=1 SV=1	Spotted leaf protein, putative [Ricinus communis]
c35039.graph_c0	6.24736	17.4899	6.3739e-12	1.50569	up	General function prediction only	Biological Process: MAPK cascade (GO:0000165);; Biological Process: response to hypoxia (GO:0001666);; Cellular Component: cytoplasm (GO:0005737);; Biological Process: protein targeting to membrane (GO:0006612);; Biological Process: detection of biotic stimulus (GO:0009595);; Biological Process: salicylic acid biosynthetic process (GO:0009697);; Biological Process: flavonoid biosynthetic process …	--	Flavanone 3-dioxygenase OS=Petroselinum crispum GN=FHT PE=1 SV=1	flavonoid biosynthesis oxidoreductase protein [Solanum lycopersicum]
c40073.graph_c0	3.39618	15.9773	0	2.24256	up	Secondary metabolites biosynthesis, transport and catabolism	Molecular Function: monooxygenase activity (GO:0004497);; Molecular Function: iron ion binding (GO:0005506);; Molecular Function: electron carrier activity (GO:0009055);; Molecular Function: oxidoreductase activity, acting on single donors with incorporation of molecular oxygen, incorporation of two atoms of oxygen (GO:0016702);; Molecular Function: oxidoreductase activity, acting on paired donor…	--	Flavonoid 3&apos;-monooxygenase OS=Petunia hybrida GN=CYP75B2 PE=2 SV=1	CYP92B2v2 [Nicotiana tabacum]
c35613.graph_c0	3.93169	10.3485	2.56935e-07	1.41155	up	--	Cellular Component: chloroplast (GO:0009507);; Biological Process: chlorophyll catabolic process (GO:0015996);; Molecular Function: chlorophyllase activity (GO:0047746);;	--	Chlorophyllase-2, chloroplastic OS=Arabidopsis thaliana GN=CLH2 PE=1 SV=1	putative chlorophyllase [Nicotiana tabacum]
c28870.graph_c0	1.39132	4.92773	6.69414e-08	1.82021	up	--	--	--	--	PREDICTED: F-box protein PP2-B10-like [Setaria italica]
c38745.graph_c1	2.13662	4.84185	0.000200329	1.19587	up	--	Molecular Function: protein kinase activity (GO:0004672);; Molecular Function: binding (GO:0005488);;	--	Probable receptor-like protein kinase At5g39030 OS=Arabidopsis thaliana GN=At5g39030 PE=2 SV=1	PREDICTED: probable receptor-like protein kinase At5g39030-like [Solanum lycopersicum]
c39538.graph_c0	6.95635	14.7612	1.84916e-08	1.11112	up	Posttranslational modification, protein turnover, chaperones	Molecular Function: serine-type endopeptidase activity (GO:0004252);; Cellular Component: cell wall (GO:0005618);; Biological Process: proteolysis (GO:0006508);; Cellular Component: apoplast (GO:0048046);;	--	Subtilisin-like protease OS=Arabidopsis thaliana GN=ARA12 PE=1 SV=1	PREDICTED: subtilisin-like protease-like [Solanum lycopersicum]
c35930.graph_c0	5.13859	12.4533	1.31655e-08	1.29868	up	General function prediction only	Biological Process: maltose metabolic process (GO:0000023);; Molecular Function: nucleotide binding (GO:0000166);; Molecular Function: RNA binding (GO:0003723);; Biological Process: thylakoid membrane organization (GO:0010027);; Biological Process: starch biosynthetic process (GO:0019252);; Biological Process: chloroplast mRNA modification (GO:1900871);;	--	Glycine-rich RNA-binding protein 2, mitochondrial OS=Arabidopsis thaliana GN=RBG2 PE=1 SV=1	hypothetical protein PRUPE_ppa006586mg [Prunus persica]
c40693.graph_c0	59.9048	143.515	5.55112e-16	1.2884	up	Posttranslational modification, protein turnover, chaperones	Biological Process: water transport (GO:0006833);; Biological Process: response to cold (GO:0009409);; Biological Process: response to light stimulus (GO:0009416);; Cellular Component: chloroplast thylakoid membrane (GO:0009535);; Cellular Component: chloroplast stroma (GO:0009570);; Biological Process: response to salt stress (GO:0009651);; Biological Process: response to sucrose (GO:0009744);; …	--	Unknown protein DS12 from 2D-PAGE of leaf, chloroplastic OS=Oryza sativa subsp. japonica GN=Os08g0242700 PE=2 SV=2	PREDICTED: unknown protein DS12 from 2D-PAGE of leaf, chloroplastic-like [Solanum lycopersicum]
c35132.graph_c0	10.0176	20.0366	2.8888e-06	1.02516	up	--	Molecular Function: catalytic activity (GO:0003824);; Biological Process: single-organism cellular process (GO:0044763);; Biological Process: response to stimulus (GO:0050896);;	--	RING-H2 finger protein ATL80 OS=Arabidopsis thaliana GN=ATL80 PE=2 SV=1	RING/U-box superfamily protein, putative isoform 1 [Theobroma cacao]
c14274.graph_c0	685.225	1367.24	7.58727e-10	1.02521	up	Coenzyme transport and metabolism	Biological Process: maltose metabolic process (GO:0000023);; Cellular Component: mitochondrion (GO:0005739);; Cellular Component: cytosol (GO:0005829);; Biological Process: cellular response to DNA damage stimulus (GO:0006974);; Molecular Function: zinc ion binding (GO:0008270);; Biological Process: thiamine biosynthetic process (GO:0009228);; Biological Process: response to cold (GO:0009409);; C…	K03146|1e-133|pop:POPTR_568201|thiazole synthase	Thiamine thiazole synthase, chloroplastic OS=Citrus sinensis GN=THI1 PE=2 SV=1	PREDICTED: thiamine thiazole synthase, chloroplastic-like [Cucumis sativus]
c36083.graph_c0	12.4723	26.9189	1.10238e-09	1.13623	up	RNA processing and modification	Biological Process: MAPK cascade (GO:0000165);; Biological Process: nuclear-transcribed mRNA poly(A) tail shortening (GO:0000289);; Biological Process: respiratory burst involved in defense response (GO:0002679);; Molecular Function: nucleic acid binding (GO:0003676);; Molecular Function: poly(A)-specific ribonuclease activity (GO:0004535);; Cellular Component: nucleus (GO:0005634);; Biological P…	--	Probable CCR4-associated factor 1 homolog 11 OS=Arabidopsis thaliana GN=CAF1-11 PE=2 SV=1	CCR4 associated factor 1-related protein [Capsicum annuum]
c38154.graph_c0	6.34505	13.7474	2.02701e-07	1.13943	up	Secondary metabolites biosynthesis, transport and catabolism	Molecular Function: binding (GO:0005488);; Molecular Function: oxidoreductase activity (GO:0016491);;	--	Cytochrome P450 714C2 OS=Oryza sativa subsp. japonica GN=CYP714C2 PE=2 SV=1	hypothetical protein M569_16477, partial [Genlisea aurea]
c18314.graph_c0	0.167002	9.74438	1.85618e-12	4.81267	up	--	Cellular Component: nucleus (GO:0005634);; Cellular Component: plasma membrane (GO:0005886);; Molecular Function: transferase activity (GO:0016740);; Biological Process: petal morphogenesis (GO:0048446);;	--	O-acyltransferase WSD1 OS=Arabidopsis thaliana GN=WSD1 PE=2 SV=1	predicted protein [Populus trichocarpa]
c31735.graph_c0	0.423131	2.32121	4.48307e-07	2.38395	up	--	Molecular Function: magnesium ion binding (GO:0000287);; Cellular Component: plastid (GO:0009536);; Molecular Function: terpene synthase activity (GO:0010333);; Molecular Function: hydrolase activity (GO:0016787);; Molecular Function: manganese ion binding (GO:0030145);; Biological Process: geranyl diphosphate metabolic process (GO:0033383);; Molecular Function: protein homodimerization activity …	--	Geraniol synthase, chloroplastic OS=Ocimum basilicum GN=GES PE=1 SV=1	geraniol synthase [Phyla dulcis]
c25929.graph_c1	3.18756	12.1506	3.23813e-09	1.92535	up	Defense mechanisms	Cellular Component: vacuole (GO:0005773);; Cellular Component: plasma membrane (GO:0005886);; Biological Process: drug transmembrane transport (GO:0006855);; Biological Process: response to nematode (GO:0009624);; Molecular Function: drug transmembrane transporter activity (GO:0015238);; Molecular Function: antiporter activity (GO:0015297);;	--	Protein TRANSPARENT TESTA 12 OS=Arabidopsis thaliana GN=TT12 PE=2 SV=1	PREDICTED: protein TRANSPARENT TESTA 12-like [Solanum lycopersicum]
c33769.graph_c1	69.9292	145.784	2.63016e-11	1.08811	up	--	Molecular Function: mRNA binding (GO:0003729);; Molecular Function: catalytic activity (GO:0003824);; Molecular Function: protein binding (GO:0005515);; Biological Process: pentose-phosphate shunt (GO:0006098);; Biological Process: rRNA processing (GO:0006364);; Molecular Function: poly(U) RNA binding (GO:0008266);; Cellular Component: chloroplast thylakoid (GO:0009534);; Biological Process: resp…	--	Chloroplast stem-loop binding protein of 41 kDa a, chloroplastic OS=Arabidopsis thaliana GN=CSP41A PE=1 SV=1	Chloroplast stem-loop binding protein of 41 kDa isoform 1 [Theobroma cacao]
c40708.graph_c0	59.2246	140.779	6.66134e-16	1.27716	up	General function prediction only	Molecular Function: RNA binding (GO:0003723);; Biological Process: phosphate-containing compound metabolic process (GO:0006796);; Biological Process: response to cold (GO:0009409);; Biological Process: RNA modification (GO:0009451);; Cellular Component: thylakoid (GO:0009579);; Biological Process: regulation of gene expression (GO:0010468);; Biological Process: cellular component organization (GO…	--	31 kDa ribonucleoprotein, chloroplastic OS=Arabidopsis thaliana GN=RBP31 PE=1 SV=1	unnamed protein product [Vitis vinifera]
c36218.graph_c0	27.3531	58.0454	5.63746e-11	1.1131	up	--	Molecular Function: inorganic phosphate transmembrane transporter activity (GO:0005315);; Biological Process: phosphate ion transport (GO:0006817);; Cellular Component: integral component of membrane (GO:0016021);; Biological Process: transmembrane transport (GO:0055085);;	--	Inorganic phosphate transporter 1-4 OS=Arabidopsis thaliana GN=PHT1-4 PE=1 SV=1	phosphate transporter [Catharanthus roseus]
c39135.graph_c0	1.53323	6.01147	1.6052e-09	1.96471	up	--	Molecular Function: protein kinase activity (GO:0004672);; Biological Process: cellular process (GO:0009987);;	--	Serine/threonine-protein kinase BCK1/SLK1/SSP31 OS=Saccharomyces cerevisiae (strain ATCC 204508 / S288c) GN=BCK1 PE=1 SV=1	PREDICTED: mitogen-activated protein kinase kinase kinase 3-like [Solanum lycopersicum]
c25262.graph_c0	3.88013	8.32074	0.00251455	1.11549	up	--	Molecular Function: binding (GO:0005488);;	--	--	hypothetical protein VITISV_001696 [Vitis vinifera]
c28390.graph_c0	2.84063	6.28497	1.75705e-05	1.16556	up	--	Molecular Function: intracellular cyclic nucleotide activated cation channel activity (GO:0005221);; Molecular Function: inward rectifier potassium channel activity (GO:0005242);; Molecular Function: calmodulin binding (GO:0005516);; Cellular Component: plasma membrane (GO:0005886);; Biological Process: potassium ion transport (GO:0006813);; Biological Process: calcium ion transport (GO:0006816);…	--	Cyclic nucleotide-gated ion channel 1 OS=Arabidopsis thaliana GN=CNGC1 PE=1 SV=1	PREDICTED: cyclic nucleotide-gated ion channel 1-like [Solanum lycopersicum]
c39166.graph_c0	4.36184	9.02876	6.83237e-06	1.07298	up	--	Biological Process: response to light stimulus (GO:0009416);; Cellular Component: plastid (GO:0009536);; Biological Process: response to auxin (GO:0009733);; Biological Process: response to brassinosteroid (GO:0009741);; Molecular Function: indole-3-acetic acid amido synthetase activity (GO:0010279);; Biological Process: response to cyclopentenone (GO:0010583);; Cellular Component: cytoplasmic me…	K14487|0.0|vvi:100250741|hypothetical protein LOC100250741	Probable indole-3-acetic acid-amido synthetase GH3.1 OS=Arabidopsis thaliana GN=GH3.1 PE=2 SV=1	Auxin-responsive GH3 family protein [Theobroma cacao]
c33418.graph_c0	2.79762	5.88911	1.65729e-05	1.09594	up	--	Cellular Component: mitochondrion (GO:0005739);;	--	--	unnamed protein product [Vitis vinifera]
c16792.graph_c0	0.279612	5.06069	8.91953e-13	3.86184	up	Translation, ribosomal structure and biogenesis	Molecular Function: RNA binding (GO:0003723);; Cellular Component: extracellular space (GO:0005615);; Cellular Component: cell wall (GO:0005618);; Cellular Component: plasma membrane (GO:0005886);; Biological Process: aging (GO:0007568);; Biological Process: response to wounding (GO:0009611);; Biological Process: response to salt stress (GO:0009651);; Biological Process: anthocyanin-containing co…	K01166|1e-126|rcu:RCOM_0836480|ribonuclease t2, putative (EC:3.1.27.1)	Extracellular ribonuclease LE OS=Solanum lycopersicum PE=1 SV=2	RNase NE [Nicotiana alata]
c16447.graph_c0	1.01604	4.22256	0.000579557	1.99064	up	--	--	--	--	conserved hypothetical protein [Ricinus communis]
c18307.graph_c0	0.970479	6.61448	2.76565e-10	2.69269	up	--	Molecular Function: transferase activity, transferring glycosyl groups (GO:0016757);;	--	UDP-glycosyltransferase 85A2 OS=Arabidopsis thaliana GN=UGT85A2 PE=2 SV=1	hypothetical protein M569_14056, partial [Genlisea aurea]
c36060.graph_c0	1.92942	5.21202	0.000117415	1.43745	up	--	--	--	Transcription factor TCP12 OS=Arabidopsis thaliana GN=TCP12 PE=2 SV=1	TCP1 [Petunia x hybrida]
c23883.graph_c0	0.718996	2.71915	0.00819592	1.85042	up	--	Molecular Function: protein serine/threonine kinase activity (GO:0004674);; Molecular Function: ATP binding (GO:0005524);; Biological Process: protein phosphorylation (GO:0006468);; Biological Process: abscisic acid-activated signaling pathway (GO:0009738);;	K14498|2e-86|pop:POPTR_931343|hypothetical protein	Serine/threonine-protein kinase SAPK5 OS=Oryza sativa subsp. japonica GN=SAPK5 PE=2 SV=1	serine/threonine protein kinase [Brassica napus]
c42003.graph_c0	3.13103	13.3717	0	2.10793	up	Cell wall/membrane/envelope biogenesis	Cellular Component: Golgi apparatus (GO:0005794);; Biological Process: response to oxidative stress (GO:0006979);; Biological Process: abscisic acid-activated signaling pathway (GO:0009738);; Biological Process: carbohydrate biosynthetic process (GO:0016051);; Biological Process: endoplasmic reticulum unfolded protein response (GO:0030968);; Biological Process: intracellular signal transduction (…	--	Probable galacturonosyltransferase-like 10 OS=Arabidopsis thaliana GN=GATL10 PE=2 SV=1	PREDICTED: probable galacturonosyltransferase-like 10-like [Solanum lycopersicum]
c33394.graph_c0	2.00899	5.98609	8.12137e-05	1.57059	up	--	Biological Process: response to bacterium (GO:0009617);; Biological Process: innate immune response (GO:0045087);; Biological Process: cellular response to stimulus (GO:0051716);;	K13456|3e-84|pop:POPTR_709976|hypothetical protein	RPM1-interacting protein 4 OS=Arabidopsis thaliana GN=RIN4 PE=1 SV=1	predicted protein [Populus trichocarpa]
c36283.graph_c0	4.46346	20.9939	0	2.25135	up	Secondary metabolites biosynthesis, transport and catabolism	Molecular Function: binding (GO:0005488);; Molecular Function: oxidoreductase activity (GO:0016491);;	--	Secologanin synthase OS=Catharanthus roseus GN=CYP72A1 PE=2 SV=1	CYP72A57 [Nicotiana tabacum]
c33962.graph_c1	3.48585	18.1155	0	2.37452	up	Posttranslational modification, protein turnover, chaperones	--	K13993|7e-59|vvi:100267696|hypothetical protein LOC100267696	Small heat shock protein C4 OS=Rickettsia felis (strain ATCC VR-1525 / URRWXCal2) GN=hspc4-1 PE=3 SV=1	PREDICTED: uncharacterized protein LOC100267696 [Vitis vinifera]
c32017.graph_c0	8.41644	17.2589	1.10416e-06	1.06086	up	--	Molecular Function: fatty acid binding (GO:0005504);; Biological Process: fatty acid metabolic process (GO:0006631);; Cellular Component: chloroplast stroma (GO:0009570);; Biological Process: flavonoid biosynthetic process (GO:0009813);; Molecular Function: chalcone isomerase activity (GO:0045430);;	--	Fatty-acid-binding protein 3 OS=Arabidopsis thaliana GN=FAP3 PE=1 SV=1	PREDICTED: chalcone--flavonone isomerase-like [Solanum lycopersicum]
c29630.graph_c0	8.26832	20.7231	2.11752e-10	1.34825	up	--	--	--	Probable WRKY transcription factor 70 OS=Arabidopsis thaliana GN=WRKY70 PE=2 SV=1	PREDICTED: probable WRKY transcription factor 70-like [Solanum lycopersicum]
c36268.graph_c0	1.95933	4.54158	0.000347483	1.22614	up	Carbohydrate transport and metabolism	Molecular Function: sucrose alpha-glucosidase activity (GO:0004575);; Biological Process: sucrose biosynthetic process (GO:0005986);; Molecular Function: levanase activity (GO:0031219);; Molecular Function: inulinase activity (GO:0051670);;	K01193|0.0|pop:POPTR_561648|hypothetical protein	Beta-fructofuranosidase, insoluble isoenzyme CWINV1 OS=Arabidopsis thaliana GN=CWINV1 PE=1 SV=1	Glycosyl hydrolases family 32 protein, putative [Theobroma cacao]
c28873.graph_c0	14.6622	30.268	2.15148e-09	1.07286	up	Signal transduction mechanisms	Biological Process: cellular process (GO:0009987);;	--	Two-component response regulator-like APRR1 OS=Arabidopsis thaliana GN=APRR1 PE=1 SV=1	timing of cab expression 1/pseudo-response regulator 1 [Nicotiana attenuata]
c41427.graph_c0	15.541	38.2968	8.88178e-16	1.32837	up	Signal transduction mechanisms	Biological Process: response to light stimulus (GO:0009416);; Biological Process: primary metabolic process (GO:0044238);; Biological Process: cellular macromolecule metabolic process (GO:0044260);; Biological Process: single-organism cellular process (GO:0044763);; Biological Process: regulation of cellular process (GO:0050794);;	--	Two-component response regulator-like APRR5 OS=Arabidopsis thaliana GN=APRR5 PE=1 SV=2	PREDICTED: two-component response regulator-like APRR5-like [Solanum lycopersicum]
c28433.graph_c0	0.352871	5.10928	0	3.73763	up	Secondary metabolites biosynthesis, transport and catabolism	Molecular Function: iron ion binding (GO:0005506);; Cellular Component: endoplasmic reticulum membrane (GO:0005789);; Molecular Function: electron carrier activity (GO:0009055);; Cellular Component: integral component of membrane (GO:0016021);; Biological Process: monoterpenoid biosynthetic process (GO:0016099);; Molecular Function: oxidoreductase activity, acting on paired donors, with incorpora…	--	Geraniol 8-hydroxylase OS=Catharanthus roseus GN=CYP76B6 PE=1 SV=1	geraniol 10-hydroxylase [Picrorhiza kurrooa]
c39089.graph_c0	0.910154	4.79433	4.1856e-08	2.34423	up	--	--	--	--	PREDICTED: uncharacterized protein LOC100854636 [Vitis vinifera]
c25062.graph_c0	3.9871	23.6426	0	2.56315	up	--	Biological Process: anthocyanin-containing compound biosynthetic process (GO:0009718);; Molecular Function: transferase activity, transferring acyl groups other than amino-acyl groups (GO:0016747);; Biological Process: pigmentation (GO:0043473);;	--	Pelargonidin 3-O-(6-caffeoylglucoside) 5-O-(6-O-malonylglucoside) 4&apos;&apos;&apos;-malonyltransferase OS=Salvia splendens PE=1 SV=1	predicted protein [Populus trichocarpa]
c43962.graph_c0	0.403244	2.10598	6.47513e-06	2.30633	up	--	--	--	Vinorine synthase OS=Rauvolfia serpentina GN=ACT PE=1 SV=2	Anthranilate N-benzoyltransferase protein, putative [Theobroma cacao]
c27132.graph_c0	5.42257	11.2163	2.6244e-05	1.07098	up	Transcription	Biological Process: maltose metabolic process (GO:0000023);; Molecular Function: plastid sigma factor activity (GO:0001053);; Molecular Function: DNA binding (GO:0003677);; Molecular Function: sequence-specific DNA binding transcription factor activity (GO:0003700);; Molecular Function: DNA-directed RNA polymerase activity (GO:0003899);; Biological Process: pentose-phosphate shunt (GO:0006098);; …	--	RNA polymerase sigma factor sigD, chloroplastic OS=Arabidopsis thaliana GN=SIGD PE=2 SV=1	PREDICTED: RNA polymerase sigma factor rpoD-like [Vitis vinifera]
c34228.graph_c0	3.16437	10.8682	7.76657e-06	1.76722	up	--	Biological Process: metabolic process (GO:0008152);; Molecular Function: oxidoreductase activity (GO:0016491);;	--	Dihydroflavonol-4-reductase OS=Hordeum vulgare GN=ANT18 PE=3 SV=1	predicted protein [Populus trichocarpa]
c26846.graph_c0	3.88854	14.3519	2.22045e-16	1.89892	up	--	Molecular Function: oxidoreductase activity (GO:0016491);;	--	Transcription factor bHLH18 OS=Arabidopsis thaliana GN=BHLH18 PE=2 SV=1	Basic helix-loop-helix DNA-binding superfamily protein, putative [Theobroma cacao]
c25374.graph_c0	1.15753	4.50271	0.000521795	1.90885	up	--	--	--	--	predicted protein [Populus trichocarpa]
c38560.graph_c0	0.116032	2.1523	0	4.00178	up	--	--	--	Retrovirus-related Pol polyprotein LINE-1 OS=Mus musculus GN=Pol PE=1 SV=2	hypothetical protein [Beta vulgaris subsp. vulgaris]
c44702.graph_c0	0	1.79908	0.000941615	4.253	up	--	--	--	--	predicted protein [Populus trichocarpa]
c27199.graph_c0	1.03597	6.15673	2.22045e-16	2.55114	up	--	Biological Process: tryptophan catabolic process (GO:0006569);; Biological Process: indoleacetic acid biosynthetic process (GO:0009684);; Biological Process: glucosinolate biosynthetic process (GO:0019761);; Biological Process: defense response to bacterium (GO:0042742);; Molecular Function: indole-3-acetate beta-glucosyltransferase activity (GO:0047215);; Molecular Function: thiohydroximate beta…	--	UDP-glycosyltransferase 74B1 OS=Arabidopsis thaliana GN=UGT74B1 PE=1 SV=1	UDP-glucose:glucosyltransferase [Lycium barbarum]
c32505.graph_c0	2.25515	9.23019	7.50907e-10	2.02409	up	--	Cellular Component: chloroplast (GO:0009507);; Cellular Component: membrane (GO:0016020);;	--	--	PREDICTED: uncharacterized protein LOC100250842 [Vitis vinifera]
c15403.graph_c0	0.261227	2.72856	0.000500733	2.9935	up	--	--	--	Probable WRKY transcription factor 42 OS=Arabidopsis thaliana GN=WRKY42 PE=2 SV=1	WRKY transcription factor [Picrorhiza kurrooa]
c35542.graph_c1	0.189243	2.11299	0.000154749	3.08645	up	--	Molecular Function: ferric-chelate reductase activity (GO:0000293);; Cellular Component: integral component of membrane (GO:0016021);; Biological Process: oxidation-reduction process (GO:0055114);;	--	Ferric reduction oxidase 4 OS=Arabidopsis thaliana GN=FRO4 PE=2 SV=1	Fe(III)-chelate reductase [Citrus junos]
c25907.graph_c0	2.84499	6.47759	0.00138582	1.19895	up	Amino acid transport and metabolism	Molecular Function: nucleotide binding (GO:0000166);; Biological Process: cellular amino acid biosynthetic process (GO:0008652);; Cellular Component: plastid (GO:0009536);; Molecular Function: kinase activity (GO:0016301);; Biological Process: phosphorylation (GO:0016310);; Molecular Function: ion binding (GO:0043167);;	K00891|1e-94|vvi:100262762|shikimate kinase	Shikimate kinase, chloroplastic OS=Solanum lycopersicum GN=SK PE=1 SV=1	shikimate kinase, partial [Ipomoea purpurea]
c27047.graph_c0	2.34788	10.9089	0.000998654	2.12139	up	--	--	--	Dirigent protein 2 OS=Arabidopsis thaliana GN=DIR2 PE=2 SV=1	PREDICTED: disease resistance response protein 206-like [Solanum lycopersicum]
c18129.graph_c1	3.55217	15.0971	6.32737e-05	2.03427	up	--	Biological Process: response to wounding (GO:0009611);; Biological Process: response to fungus (GO:0009620);; Biological Process: jasmonic acid biosynthetic process (GO:0009695);; Biological Process: response to jasmonic acid (GO:0009753);; Biological Process: ethylene-activated signaling pathway (GO:0009873);; Biological Process: response to chitin (GO:0010200);;	--	--	uncharacterized protein [Arabidopsis thaliana]
c13755.graph_c0	0.55764	2.65831	3.91168e-07	2.2067	up	Replication, recombination and repair	Molecular Function: binding (GO:0005488);; Biological Process: macromolecule metabolic process (GO:0043170);; Biological Process: primary metabolic process (GO:0044238);;	--	Uncharacterized mitochondrial protein AtMg00860 OS=Arabidopsis thaliana GN=AtMg00860 PE=4 SV=1	PREDICTED: uncharacterized protein LOC100809540 [Glycine max]
c18109.graph_c1	0.325495	5.20529	1.2812e-13	3.7475	up	General function prediction only	Molecular Function: oxidoreductase activity, acting on the CH-OH group of donors, NAD or NADP as acceptor (GO:0016616);; Biological Process: single-organism metabolic process (GO:0044710);; Molecular Function: metal ion binding (GO:0046872);;	--	8-hydroxygeraniol dehydrogenase OS=Catharanthus roseus GN=10HGO PE=1 SV=1	RecName: Full=8-hydroxygeraniol dehydrogenase; Short=Cr10HGO
c37808.graph_c0	13.6031	30.4119	1.68531e-11	1.18752	up	Translation, ribosomal structure and biogenesis	Biological Process: maltose metabolic process (GO:0000023);; Cellular Component: chloroplast (GO:0009507);; Biological Process: production of ta-siRNAs involved in RNA interference (GO:0010267);; Biological Process: starch biosynthetic process (GO:0019252);; Biological Process: production of miRNAs involved in gene silencing by miRNA (GO:0035196);; Biological Process: ribosome biogenesis (GO:0042…	--	Ribosome maturation factor RimM OS=Synechococcus sp. (strain CC9311) GN=rimM PE=3 SV=1	PREDICTED: uncharacterized protein LOC100251997 [Vitis vinifera]
c27317.graph_c0	0.789418	5.28856	0.00231001	2.52001	up	--	--	--	--	unknown [Nicotiana tabacum]
c27912.graph_c2	0.369981	1.71904	0.000998654	2.12139	up	--	Molecular Function: kinase activity (GO:0016301);; Biological Process: phosphorylation (GO:0016310);;	--	G-type lectin S-receptor-like serine/threonine-protein kinase At1g11330 OS=Arabidopsis thaliana GN=At1g11330 PE=1 SV=3	S-locus lectin protein kinase family protein, putative [Theobroma cacao]
c30214.graph_c0	72.0796	185.615	0	1.39293	up	Inorganic ion transport and metabolism	Biological Process: MAPK cascade (GO:0000165);; Molecular Function: carbonate dehydratase activity (GO:0004089);; Cellular Component: cytosol (GO:0005829);; Biological Process: pentose-phosphate shunt (GO:0006098);; Biological Process: protein targeting to membrane (GO:0006612);; Molecular Function: zinc ion binding (GO:0008270);; Biological Process: response to cold (GO:0009409);; Cellular Compo…	K01673|1e-162|vvi:100249137|hypothetical protein LOC100249137	Carbonic anhydrase, chloroplastic OS=Nicotiana tabacum PE=2 SV=1	PREDICTED: carbonic anhydrase, chloroplastic [Vitis vinifera]
c14045.graph_c0	7.65239	16.0412	0.000209061	1.08765	up	Cell cycle control, cell division, chromosome partitioning	Molecular Function: GTPase activity (GO:0003924);; Molecular Function: GTP binding (GO:0005525);; Biological Process: GTP catabolic process (GO:0006184);; Cellular Component: chloroplast stroma (GO:0009570);; Biological Process: chloroplast fission (GO:0010020);; Cellular Component: membrane (GO:0016020);; Molecular Function: identical protein binding (GO:0042802);; Cellular Component: protein co…	K03531|7e-38|pop:POPTR_717208|hypothetical protein	Cell division protein FtsZ homolog 2-1, chloroplastic OS=Arabidopsis thaliana GN=FTSZ2-1 PE=1 SV=2	PREDICTED: cell division protein FtsZ homolog 2-1, chloroplastic-like [Solanum lycopersicum]
c17744.graph_c0	5.52714	15.315	6.2316e-10	1.4884	up	--	Molecular Function: dicarboxylic acid transmembrane transporter activity (GO:0005310);; Biological Process: dicarboxylic acid transport (GO:0006835);; Biological Process: mitochondrial transport (GO:0006839);; Cellular Component: integral component of membrane (GO:0016021);; Cellular Component: mitochondrial membrane (GO:0031966);; Biological Process: transmembrane transport (GO:0055085);;	--	Mitochondrial uncoupling protein 5 OS=Arabidopsis thaliana GN=PUMP5 PE=2 SV=1	mitochondrial dicarboxylate carrier protein, putative [Ricinus communis]
c30702.graph_c0	5.65604	23.5731	2.22045e-15	2.0654	up	--	Molecular Function: structural constituent of cell wall (GO:0005199);; Cellular Component: nucleus (GO:0005634);; Biological Process: amino acid transport (GO:0006865);; Biological Process: response to wounding (GO:0009611);; Biological Process: response to abscisic acid (GO:0009737);; Biological Process: response to salicylic acid (GO:0009751);; Biological Process: response to jasmonic acid (GO:…	--	Extensin-1 OS=Arabidopsis thaliana GN=EXT1 PE=2 SV=2	extensin [Nicotiana sylvestris]
c20049.graph_c0	11.9206	30.2217	9.18154e-14	1.36748	up	--	Molecular Function: transcription cofactor activity (GO:0003712);; Molecular Function: histone acetyltransferase activity (GO:0004402);; Cellular Component: nucleus (GO:0005634);; Cellular Component: cytoplasm (GO:0005737);; Biological Process: regulation of transcription, DNA-templated (GO:0006355);; Biological Process: circadian rhythm (GO:0007623);; Molecular Function: zinc ion binding (GO:000…	--	BTB/POZ and TAZ domain-containing protein 1 OS=Arabidopsis thaliana GN=BT1 PE=1 SV=1	hypothetical protein PRUPE_ppa006416mg [Prunus persica]
c24706.graph_c0	2.15902	7.30566	1.71044e-07	1.75665	up	--	Biological Process: response to stress (GO:0006950);; Biological Process: response to abiotic stimulus (GO:0009628);;	--	Zinc finger protein AZF2 OS=Arabidopsis thaliana GN=AZF2 PE=2 SV=1	hypothetical protein PRUPE_ppa009924mg [Prunus persica]
c39386.graph_c0	4.73382	9.95972	2.68888e-07	1.09785	up	--	Biological Process: MAPK cascade (GO:0000165);; Molecular Function: nucleotide binding (GO:0000166);; Molecular Function: protein serine/threonine kinase activity (GO:0004674);; Biological Process: protein phosphorylation (GO:0006468);; Molecular Function: ion binding (GO:0043167);;	--	Wall-associated receptor kinase-like 10 OS=Arabidopsis thaliana GN=WAKL10 PE=2 SV=1	PREDICTED: wall-associated receptor kinase 2-like [Solanum lycopersicum]
c36590.graph_c0	9.48328	24.6145	5.68134e-12	1.39924	up	--	Cellular Component: plasma membrane (GO:0005886);; Cellular Component: chloroplast (GO:0009507);;	--	--	PREDICTED: uncharacterized protein LOC100255653 [Vitis vinifera]
c40610.graph_c0	91.9759	183.482	1.62084e-09	1.02433	up	--	Biological Process: pentose-phosphate shunt (GO:0006098);; Cellular Component: chloroplast thylakoid membrane (GO:0009535);; Cellular Component: chloroplast stroma (GO:0009570);; Cellular Component: chloroplast envelope (GO:0009941);; Biological Process: isopentenyl diphosphate biosynthetic process, methylerythritol 4-phosphate pathway (GO:0019288);; Biological Process: protein targeting to chlor…	--	--	PREDICTED: uncharacterized protein LOC101245116 isoform 1 [Solanum lycopersicum]
c40899.graph_c0	43.9979	88.1545	1.4125e-09	1.03055	up	Coenzyme transport and metabolism	Molecular Function: uroporphyrinogen decarboxylase activity (GO:0004853);; Biological Process: tryptophan catabolic process (GO:0006569);; Biological Process: protoporphyrinogen IX biosynthetic process (GO:0006782);; Cellular Component: chloroplast stroma (GO:0009570);; Biological Process: indoleacetic acid biosynthetic process (GO:0009684);; Biological Process: response to cadmium ion (GO:004668…	K01599|0.0|vvi:100252130|hypothetical protein LOC100252130	Uroporphyrinogen decarboxylase 1, chloroplastic OS=Arabidopsis thaliana GN=HEME1 PE=2 SV=2	PREDICTED: uroporphyrinogen decarboxylase 1, chloroplastic-like [Vitis vinifera]
c22899.graph_c0	1.9032	5.81176	0.00170574	1.59144	up	Signal transduction mechanisms	Biological Process: phosphorelay signal transduction system (GO:0000160);; Cellular Component: nucleus (GO:0005634);; Cellular Component: cytoplasm (GO:0005737);; Molecular Function: histidine phosphotransfer kinase activity (GO:0009927);; Molecular Function: 2-alkenal reductase [NAD(P)] activity (GO:0032440);; Biological Process: oxidation-reduction process (GO:0055114);; Biological Process: reg…	K14490|6e-82|vvi:100246353|hypothetical protein LOC100246353	Histidine-containing phosphotransfer protein 4 OS=Arabidopsis thaliana GN=AHP4 PE=1 SV=2	histidine phosphotransfer protein [Populus x canadensis]
c18803.graph_c0	25.8354	61.8518	1.14497e-12	1.28548	up	Energy production and conversion	Biological Process: pentose-phosphate shunt (GO:0006098);; Molecular Function: electron carrier activity (GO:0009055);; Cellular Component: chloroplast thylakoid membrane (GO:0009535);; Biological Process: photosynthetic electron transport in photosystem I (GO:0009773);; Cellular Component: NAD(P)H dehydrogenase complex (plastoquinone) (GO:0010598);; Biological Process: starch biosynthetic proces…	--	--	NDH-dependent cyclic electron flow 1 isoform 1 [Theobroma cacao]
c36609.graph_c0	2.78408	7.80412	7.66746e-08	1.50012	up	--	--	--	Probable inactive protein kinase DDB_G0270444 OS=Dictyostelium discoideum GN=DDB_G0270444 PE=1 SV=1	hypothetical protein MTR_027s0011 [Medicago truncatula]
c33735.graph_c0	7.30635	15.1355	5.74032e-06	1.0742	up	Nucleotide transport and metabolism	Molecular Function: orotate phosphoribosyltransferase activity (GO:0004588);; Molecular Function: orotidine-5'-phosphate decarboxylase activity (GO:0004590);; Cellular Component: cytosol (GO:0005829);; Biological Process: 'de novo' pyrimidine nucleobase biosynthetic process (GO:0006207);; Biological Process: cellular response to phosphate starvation (GO:0016036);; Biological Process: 'de novo' UM…	K13421|1e-75|pop:POPTR_647290|hypothetical protein	Uridine 5&apos;-monophosphate synthase (Fragment) OS=Nicotiana tabacum GN=PYR5-6 PE=2 SV=1	hypothetical protein M569_10995, partial [Genlisea aurea]
c41289.graph_c0	27.8672	60.8338	1.11294e-10	1.15311	up	Carbohydrate transport and metabolism	Biological Process: carbohydrate metabolic process (GO:0005975);; Cellular Component: plastid (GO:0009536);; Molecular Function: hydrolase activity (GO:0016787);; Biological Process: response to stimulus (GO:0050896);;	K01057|3e-99|pop:POPTR_772510|hypothetical protein	Probable 6-phosphogluconolactonase 4, chloroplastic OS=Oryza sativa subsp. japonica GN=Os09g0529100 PE=1 SV=2	PREDICTED: probable 6-phosphogluconolactonase 4, chloroplastic-like [Solanum lycopersicum]
c32328.graph_c0	4.6539	18.9139	1.11022e-16	2.03287	up	--	Biological Process: transport (GO:0006810);;	--	Non-specific lipid-transfer protein 3 OS=Lens culinaris PE=3 SV=1	lipid-transfer protein [Nicotiana attenuata]
c30475.graph_c0	1.36951	7.39901	9.07718e-13	2.40904	up	--	Cellular Component: integral component of membrane (GO:0016021);;	--	Purine permease 3 OS=Arabidopsis thaliana GN=PUP3 PE=2 SV=1	PREDICTED: purine permease 3 [Vitis vinifera]
c38975.graph_c1	2.17329	5.79502	2.43633e-06	1.42677	up	--	--	--	--	hypothetical protein M569_11401 [Genlisea aurea]
c38258.graph_c0	1.9003	5.72774	4.60502e-08	1.60088	up	Secondary metabolites biosynthesis, transport and catabolism	Molecular Function: monooxygenase activity (GO:0004497);; Molecular Function: binding (GO:0005488);; Molecular Function: oxidoreductase activity, acting on paired donors, with incorporation or reduction of molecular oxygen (GO:0016705);;	--	Cytochrome P450 71A1 OS=Persea americana GN=CYP71A1 PE=1 SV=2	PREDICTED: cytochrome P450 83B1 [Vitis vinifera]
c37292.graph_c0	4.61697	9.38369	0.0020723	1.04168	up	Posttranslational modification, protein turnover, chaperones	Cellular Component: plastid (GO:0009536);; Molecular Function: isomerase activity (GO:0016853);; Biological Process: peptidyl-proline modification (GO:0018208);;	--	Peptidyl-prolyl cis-trans isomerase FKBP17-1, chloroplastic OS=Arabidopsis thaliana GN=FKBP17-1 PE=2 SV=1	PREDICTED: peptidyl-prolyl cis-trans isomerase FKBP17-1, chloroplastic-like [Solanum lycopersicum]
c18043.graph_c0	0	4.71002	0	8.34542	up	--	--	--	Putative ribonuclease H protein At1g65750 OS=Arabidopsis thaliana GN=At1g65750 PE=3 SV=1	hypothetical protein [Beta vulgaris subsp. vulgaris]
c17793.graph_c1	6.18236	13.3605	0.00103984	1.1277	up	--	Biological Process: regulation of transcription, DNA-templated (GO:0006355);; Biological Process: chloroplast organization (GO:0009658);; Cellular Component: chloroplast nucleoid (GO:0042644);;	--	--	PREDICTED: uncharacterized protein LOC101244147 [Solanum lycopersicum]
c40927.graph_c0	26.5	76.8633	0	1.56272	up	Nucleotide transport and metabolism	Molecular Function: NAD+ diphosphatase activity (GO:0000210);; Cellular Component: cytosol (GO:0005829);; Biological Process: metabolic process (GO:0008152);; Cellular Component: plastid (GO:0009536);; Molecular Function: ADP-ribose diphosphatase activity (GO:0047631);; Molecular Function: NAD binding (GO:0051287);;	--	Nudix hydrolase 10 OS=Arabidopsis thaliana GN=NUDT10 PE=1 SV=1	PREDICTED: nudix hydrolase 2-like [Solanum lycopersicum]
c27652.graph_c1	3.69631	13.1358	1.31619e-09	1.83154	up	--	--	K13424|1e-50|pop:POPTR_577093|hypothetical protein	Probable WRKY transcription factor 33 OS=Arabidopsis thaliana GN=WRKY33 PE=1 SV=2	WRKY-type transcription factor [Solanum chacoense]
c21648.graph_c0	0.199792	1.835	0.000121136	2.90469	up	--	Molecular Function: 1-deoxy-D-xylulose-5-phosphate synthase activity (GO:0008661);; Biological Process: terpenoid biosynthetic process (GO:0016114);;	K01662|0.0|rcu:RCOM_0025610|1-deoxyxylulose-5-phosphate synthase, putative (EC:2.2.1.7)	Probable 1-deoxy-D-xylulose-5-phosphate synthase 2, chloroplastic OS=Oryza sativa subsp. japonica GN=Os07g0190000 PE=2 SV=1	1-deoxy-D-xylulose-5-phosphate synthase [Antirrhinum majus]
c34323.graph_c2	26.4694	56.7608	8.84329e-11	1.12784	up	General function prediction only	Biological Process: mRNA splicing, via spliceosome (GO:0000398);; Molecular Function: RNA binding (GO:0003723);; Cellular Component: nucleus (GO:0005634);; Cellular Component: chloroplast stroma (GO:0009570);;	--	28 kDa ribonucleoprotein, chloroplastic OS=Nicotiana sylvestris PE=1 SV=1	RNA-binding family protein, putative [Theobroma cacao]
c36162.graph_c0	42.4204	94.7699	8.62532e-13	1.1873	up	Translation, ribosomal structure and biogenesis	Molecular Function: copper ion binding (GO:0005507);; Biological Process: pentose-phosphate shunt (GO:0006098);; Biological Process: aromatic amino acid family biosynthetic process (GO:0009073);; Cellular Component: chloroplast stroma (GO:0009570);; Cellular Component: thylakoid (GO:0009579);; Biological Process: chloroplast organization (GO:0009658);; Biological Process: embryo development (GO:0…	K02838|1e-118|vvi:100263214|hypothetical protein LOC100263214	Ribosome-recycling factor, chloroplastic (Fragment) OS=Daucus carota GN=RRF PE=2 SV=2	Ribosome recycling factor isoform 1 [Theobroma cacao]
c34123.graph_c0	54.0521	119.553	6.76792e-13	1.17313	up	--	Molecular Function: catalytic activity (GO:0003824);; Biological Process: metabolic process (GO:0008152);; Cellular Component: plastid (GO:0009536);;	--	Uncharacterized protein ycf23 OS=Porphyra purpurea GN=ycf23 PE=3 SV=1	PREDICTED: uncharacterized protein ycf23-like [Solanum lycopersicum]
c29185.graph_c1	7.26281	22.6968	4.41536e-13	1.66139	up	--	Cellular Component: plastid (GO:0009536);; Molecular Function: hydrolase activity (GO:0016787);;	--	Nudix hydrolase 8 OS=Arabidopsis thaliana GN=NUDT8 PE=2 SV=2	PREDICTED: nudix hydrolase 8-like [Solanum lycopersicum]
c41415.graph_c0	2.45061	12.6573	0	2.3707	up	--	--	--	Ethylene-responsive transcription factor ERF017 OS=Arabidopsis thaliana GN=ERF017 PE=2 SV=1	putative dehydration-responsive element binding protein [Broussonetia papyrifera]
c27047.graph_c1	1.77648	10.9689	2.15949e-09	2.55907	up	--	--	--	Dirigent protein 22 OS=Arabidopsis thaliana GN=DIR22 PE=2 SV=1	hypothetical protein M569_08466 [Genlisea aurea]
c28268.graph_c0	2.68066	7.09785	1.96724e-09	1.42404	up	Cell wall/membrane/envelope biogenesis	Cellular Component: integral component of membrane (GO:0016021);; Molecular Function: cellulose synthase (UDP-forming) activity (GO:0016760);; Biological Process: cellulose biosynthetic process (GO:0030244);; Cellular Component: cell part (GO:0044464);;	--	Cellulose synthase-like protein E6 OS=Oryza sativa subsp. japonica GN=CSLE6 PE=2 SV=1	cellulose synthase-like protein CslE [Nicotiana tabacum]
c23543.graph_c0	2.60007	8.70474	1.00242e-10	1.75277	up	--	--	--	Transcription factor bHLH25 OS=Arabidopsis thaliana GN=BHLH25 PE=2 SV=2	Basic helix-loop-helix DNA-binding superfamily protein, putative [Theobroma cacao]
c27652.graph_c0	3.26873	10.5488	1.71291e-11	1.70358	up	--	--	K13424|1e-85|vvi:100243352|similar to DNA-binding protein	Probable WRKY transcription factor 33 OS=Arabidopsis thaliana GN=WRKY33 PE=1 SV=2	WRKY-type transcription factor [Solanum chacoense]
c26118.graph_c1	3.1162	12.0509	3.70712e-05	1.91666	up	General function prediction only	Biological Process: metabolic process (GO:0008152);; Molecular Function: hydrolase activity (GO:0016787);;	--	Bifunctional epoxide hydrolase 2 OS=Mus musculus GN=Ephx2 PE=1 SV=2	uncharacterized protein LOC100790275 [Glycine max]
c30820.graph_c0	1839.19	4617.89	0	1.35679	up	--	Molecular Function: nucleotide binding (GO:0000166);; Biological Process: alternative mRNA splicing, via spliceosome (GO:0000380);; Molecular Function: double-stranded DNA binding (GO:0003690);; Molecular Function: single-stranded DNA binding (GO:0003697);; Molecular Function: mRNA binding (GO:0003729);; Molecular Function: protein kinase activity (GO:0004672);; Cellular Component: cell wall (GO:…	--	Glycine-rich RNA-binding protein OS=Daucus carota PE=2 SV=1	PREDICTED: glycine-rich RNA-binding protein-like isoform 1 [Solanum lycopersicum]
c35741.graph_c0	17.9484	40.4217	2.16174e-11	1.19786	up	Carbohydrate transport and metabolism	Cellular Component: nucleus (GO:0005634);; Cellular Component: cytosol (GO:0005829);; Biological Process: starch catabolic process (GO:0005983);; Biological Process: sucrose biosynthetic process (GO:0005986);; Biological Process: fructose metabolic process (GO:0006000);; Biological Process: response to abscisic acid (GO:0009737);; Biological Process: response to fructose (GO:0009750);; Biological…	K03841|0.0|vvi:100264087|hypothetical protein LOC100264087	Fructose-1,6-bisphosphatase, cytosolic OS=Solanum tuberosum PE=2 SV=1	Inositol monophosphatase family protein isoform 1 [Theobroma cacao]
c30030.graph_c0	4.96092	10.0337	0.00392182	1.03391	up	--	Cellular Component: cell wall (GO:0005618);; Molecular Function: hydrolase activity, acting on ester bonds (GO:0016788);;	--	GDSL esterase/lipase At2g27360 OS=Arabidopsis thaliana GN=At2g27360 PE=2 SV=1	PREDICTED: GDSL esterase/lipase At1g28590-like [Solanum lycopersicum]
c33486.graph_c0	9.24226	61.8892	0	2.76711	up	General function prediction only	--	--	Ankyrin repeat-containing protein At3g12360 OS=Arabidopsis thaliana GN=At3g12360 PE=2 SV=1	PREDICTED: ankyrin repeat-containing protein At3g12360-like [Solanum lycopersicum]
c24144.graph_c0	0.863728	2.90356	0.00202443	1.71465	up	--	Molecular Function: lysozyme activity (GO:0003796);; Biological Process: carbohydrate metabolic process (GO:0005975);;	--	Acidic endochitinase OS=Nicotiana tabacum PE=1 SV=1	chitinase 3 [Avicennia marina]
c33539.graph_c0	4.32307	8.62054	0.0006217	1.01672	up	--	Biological Process: defense response (GO:0006952);; Biological Process: cellular carbohydrate metabolic process (GO:0044262);; Biological Process: single-organism process (GO:0044699);; Biological Process: single-organism carbohydrate metabolic process (GO:0044723);; Biological Process: regulation of biological process (GO:0050789);;	--	--	PREDICTED: uncharacterized protein LOC101262953 isoform 1 [Solanum lycopersicum]
c29858.graph_c0	4.60655	36.2427	0	2.98946	up	General function prediction only	Biological Process: metabolic process (GO:0008152);; Biological Process: systemic acquired resistance, salicylic acid mediated signaling pathway (GO:0009862);; Molecular Function: lipase activity (GO:0016298);; Molecular Function: methyl salicylate esterase activity (GO:0080031);;	--	Salicylic acid-binding protein 2 OS=Nicotiana tabacum GN=SABP2 PE=1 SV=1	protein S [Catharanthus roseus]
c16480.graph_c0	0.651792	2.69285	2.62377e-05	2.00331	up	--	--	--	--	S-locus lectin protein kinase family protein, putative [Theobroma cacao]
c3227.graph_c0	0	1.33333	0.000941615	4.253	up	--	--	--	Probable WRKY transcription factor 30 OS=Arabidopsis thaliana GN=WRKY30 PE=2 SV=1	WRKY transcription factor 53 [Jatropha curcas]
c25483.graph_c0	15.8694	35.3796	4.25429e-10	1.18252	up	--	Biological Process: maltose metabolic process (GO:0000023);; Molecular Function: calcium ion binding (GO:0005509);; Biological Process: pentose-phosphate shunt (GO:0006098);; Biological Process: rRNA processing (GO:0006364);; Cellular Component: chloroplast thylakoid membrane (GO:0009535);; Cellular Component: chloroplast thylakoid lumen (GO:0009543);; Biological Process: response to blue light (…	--	PsbP domain-containing protein 3, chloroplastic OS=Arabidopsis thaliana GN=PPD3 PE=1 SV=2	PREDICTED: psbP domain-containing protein 3, chloroplastic-like [Solanum lycopersicum]
c15955.graph_c0	0	3.67891	9.81397e-07	4.83672	up	Carbohydrate transport and metabolism	Molecular Function: hydrolase activity, acting on glycosyl bonds (GO:0016798);;	--	Beta-glucosidase 13 OS=Oryza sativa subsp. japonica GN=BGLU13 PE=2 SV=2	unknown [Lotus japonicus]
c33104.graph_c0	14.2485	30.8503	1.63505e-08	1.13969	up	--	Molecular Function: binding (GO:0005488);;	--	Transcription factor MYB44 OS=Arabidopsis thaliana GN=MYB44 PE=2 SV=1	PREDICTED: transcriptional activator Myb [Vitis vinifera]
c23701.graph_c0	0.998211	5.79749	0.00013805	2.40633	up	--	Molecular Function: DNA binding (GO:0003677);; Molecular Function: sequence-specific DNA binding transcription factor activity (GO:0003700);; Cellular Component: nucleus (GO:0005634);; Biological Process: regulation of transcription, DNA-templated (GO:0006355);; Molecular Function: protein dimerization activity (GO:0046983);; Biological Process: ovule development (GO:0048481);;	--	Agamous-like MADS-box protein AGL8 homolog OS=Solanum lycopersicum GN=TDR4 PE=2 SV=1	MADS-box transcription factor DEFH28 [Antirrhinum majus]
c36490.graph_c0	12.7304	26.6886	4.66871e-09	1.09449	up	General function prediction only	Biological Process: maltose metabolic process (GO:0000023);; Cellular Component: plasma membrane (GO:0005886);; Cellular Component: plastoglobule (GO:0010287);; Biological Process: chlorophyll catabolic process (GO:0015996);; Molecular Function: kinase activity (GO:0016301);; Biological Process: phosphorylation (GO:0016310);; Biological Process: starch biosynthetic process (GO:0019252);; Biologic…	K08869|0.0|vvi:100243380|hypothetical protein LOC100243380	Uncharacterized aarF domain-containing protein kinase At5g05200, chloroplastic OS=Arabidopsis thaliana GN=At5g05200 PE=1 SV=1	PREDICTED: uncharacterized aarF domain-containing protein kinase At5g05200, chloroplastic-like [Solanum lycopersicum]
c41986.graph_c0	2.98659	7.6783	2.02032e-05	1.37336	up	--	Molecular Function: protein binding (GO:0005515);; Biological Process: response to bacterium (GO:0009617);; Biological Process: response to abiotic stimulus (GO:0009628);; Biological Process: defense response, incompatible interaction (GO:0009814);; Biological Process: salicylic acid mediated signaling pathway (GO:0009863);; Biological Process: jasmonic acid mediated signaling pathway (GO:0009867…	--	Glutaredoxin-C9 OS=Arabidopsis thaliana GN=GRXC9 PE=1 SV=1	PREDICTED: glutaredoxin-C9-like [Vitis vinifera]
c15971.graph_c0	0.649269	3.15701	0.00425439	2.15667	up	Posttranslational modification, protein turnover, chaperones	Molecular Function: glutathione transferase activity (GO:0004364);; Biological Process: response to oxidative stress (GO:0006979);;	K00799|1e-102|pop:POPTR_678517|hypothetical protein	Glutathione S-transferase F11 OS=Arabidopsis thaliana GN=GSTF11 PE=2 SV=1	glutathione S-transferase [Perilla frutescens var. crispa]
c37039.graph_c0	1.26895	4.6693	8.94943e-09	1.87573	up	--	Molecular Function: ubiquitin-protein ligase activity (GO:0004842);; Cellular Component: nucleus (GO:0005634);; Biological Process: ubiquitin-dependent protein catabolic process (GO:0006511);; Biological Process: protein ubiquitination (GO:0016567);;	--	F-box/LRR-repeat protein 14 OS=Arabidopsis thaliana GN=FBL14 PE=2 SV=1	predicted protein [Populus trichocarpa]
c19546.graph_c0	36.7378	78.0104	3.08493e-11	1.11418	up	General function prediction only	Molecular Function: ATP binding (GO:0005524);; Cellular Component: nucleus (GO:0005634);; Molecular Function: glycerate kinase activity (GO:0008887);; Cellular Component: chloroplast stroma (GO:0009570);; Biological Process: photorespiration (GO:0009853);; Cellular Component: chloroplast envelope (GO:0009941);; Biological Process: phosphorylation (GO:0016310);;	--	D-glycerate 3-kinase, chloroplastic OS=Arabidopsis thaliana GN=GLYK PE=1 SV=2	D-glycerate 3-kinase [Medicago truncatula]
c42264.graph_c0	6.15191	18.1083	2.09399e-12	1.57666	up	--	Molecular Function: catalytic activity (GO:0003824);; Molecular Function: zinc ion binding (GO:0008270);; Cellular Component: chloroplast (GO:0009507);; Biological Process: leaf morphogenesis (GO:0009965);; Biological Process: mRNA modification (GO:0016556);; Biological Process: cell differentiation (GO:0030154);;	--	--	PREDICTED: uncharacterized protein LOC101247419 [Solanum lycopersicum]
c24643.graph_c1	1.63715	5.37016	3.17627e-05	1.70167	up	--	--	--	--	PREDICTED: uncharacterized protein LOC101255640 [Solanum lycopersicum]
c14796.graph_c1	8.888	23.8111	3.15825e-10	1.44167	up	General function prediction only	Molecular Function: zinc ion binding (GO:0008270);; Biological Process: response to bacterium (GO:0009617);; Biological Process: plant-type hypersensitive response (GO:0009626);; Biological Process: lignin biosynthetic process (GO:0009809);; Molecular Function: aryl-alcohol dehydrogenase (NAD+) activity (GO:0018456);; Molecular Function: cinnamyl-alcohol dehydrogenase activity (GO:0045551);; Mole…	--	8-hydroxygeraniol dehydrogenase OS=Catharanthus roseus GN=10HGO PE=1 SV=1	RecName: Full=8-hydroxygeraniol dehydrogenase; Short=Cr10HGO
c34228.graph_c1	1.70247	9.6996	2.33276e-06	2.42035	up	--	Molecular Function: catalytic activity (GO:0003824);; Biological Process: cellular metabolic process (GO:0044237);; Molecular Function: coenzyme binding (GO:0050662);;	--	Dihydroflavonol-4-reductase (Fragment) OS=Medicago sativa GN=DFR1 PE=2 SV=1	hypothetical protein VITISV_025426 [Vitis vinifera]
c32864.graph_c0	4.5	9.21831	0.000634358	1.05425	up	Lipid transport and metabolism	Biological Process: transition metal ion transport (GO:0000041);; Cellular Component: nucleus (GO:0005634);; Cellular Component: cytoplasm (GO:0005737);; Molecular Function: hydrolase activity (GO:0016787);;	--	Monoglyceride lipase OS=Homo sapiens GN=MGLL PE=1 SV=2	PREDICTED: monoglyceride lipase-like [Solanum lycopersicum]
c34098.graph_c0	6.58734	13.0552	1.65417e-07	1.01347	up	Function unknown	--	--	LRR receptor-like serine/threonine-protein kinase GSO2 OS=Arabidopsis thaliana GN=GSO2 PE=2 SV=2	hypothetical protein VITISV_029207 [Vitis vinifera]
c25192.graph_c0	23.19	51.052	1.54199e-10	1.16497	up	--	Biological Process: maltose metabolic process (GO:0000023);; Cellular Component: chloroplast (GO:0009507);; Biological Process: stomatal complex morphogenesis (GO:0010103);; Biological Process: starch biosynthetic process (GO:0019252);; Biological Process: isopentenyl diphosphate biosynthetic process, methylerythritol 4-phosphate pathway (GO:0019288);; Biological Process: positive regulation of t…	--	--	PREDICTED: uncharacterized protein LOC101209452 [Cucumis sativus]
c42948.graph_c0	0.524527	4.25078	0.00115094	2.72988	up	--	--	--	--	hypothetical protein PRUPE_ppa016437mg, partial [Prunus persica]
c17723.graph_c1	1.19099	4.63286	0.000521795	1.90885	up	--	Molecular Function: DNA binding (GO:0003677);; Molecular Function: sequence-specific DNA binding transcription factor activity (GO:0003700);; Cellular Component: nucleus (GO:0005634);; Biological Process: regulation of transcription, DNA-templated (GO:0006355);;	--	Ethylene-responsive transcription factor ERF110 OS=Arabidopsis thaliana GN=ERF110 PE=2 SV=2	DNA binding protein, putative [Ricinus communis]
c31484.graph_c0	24.7656	66.0422	0	1.44121	up	--	Cellular Component: chloroplast (GO:0009507);; Biological Process: embryo development ending in seed dormancy (GO:0009793);;	--	--	hypothetical protein M569_16005, partial [Genlisea aurea]
c35030.graph_c0	0.519184	4.05897	3.33067e-16	2.91259	up	Carbohydrate transport and metabolism	Biological Process: alkaloid biosynthetic process (GO:0009821);; Molecular Function: raucaffricine beta-glucosidase activity (GO:0050247);; Molecular Function: vomilenine glucosyltransferase activity (GO:0050506);;	--	Beta-glucosidase 24 OS=Oryza sativa subsp. japonica GN=BGLU24 PE=2 SV=1	putative strictosidine beta-D-glucosidase [Camptotheca acuminata]
c26841.graph_c0	3.62592	11.2889	4.01901e-14	1.65752	up	--	Molecular Function: peptidase activity (GO:0008233);; Cellular Component: cytoplasmic membrane-bounded vesicle (GO:0016023);;	--	Protein ASPARTIC PROTEASE IN GUARD CELL 1 OS=Arabidopsis thaliana GN=ASPG1 PE=1 SV=1	hypothetical protein M569_03893, partial [Genlisea aurea]
c20771.graph_c1	7.19508	31.2395	2.22045e-16	2.12372	up	--	--	--	Dirigent protein 11 OS=Arabidopsis thaliana GN=DIR11 PE=2 SV=1	PREDICTED: disease resistance response protein 206-like [Solanum lycopersicum]
c39820.graph_c0	171.901	355.502	3.86831e-11	1.07685	up	--	Molecular Function: iron ion binding (GO:0005506);; Cellular Component: chloroplast thylakoid (GO:0009534);; Molecular Function: linoleate 13S-lipoxygenase activity (GO:0016165);; Biological Process: oxylipin biosynthetic process (GO:0031408);; Biological Process: response to stimulus (GO:0050896);; Biological Process: oxidation-reduction process (GO:0055114);;	--	Linoleate 13S-lipoxygenase 2-1, chloroplastic OS=Solanum tuberosum GN=LOX2.1 PE=1 SV=1	lipoxygenase 2 [Olea europaea]
c18877.graph_c0	20.1884	48.7812	2.55351e-15	1.30019	up	Carbohydrate transport and metabolism	Biological Process: maltose metabolic process (GO:0000023);; Molecular Function: phosphoacetylglucosamine mutase activity (GO:0004610);; Molecular Function: phosphoglucomutase activity (GO:0004614);; Molecular Function: phosphomannomutase activity (GO:0004615);; Cellular Component: cytosol (GO:0005829);; Biological Process: UDP-N-acetylglucosamine biosynthetic process (GO:0006048);; Cellular Comp…	--	Phosphomannomutase/phosphoglucomutase OS=Pseudomonas syringae pv. tomato (strain DC3000) GN=algC PE=3 SV=1	phosphoglucomutase, putative [Ricinus communis]
c36356.graph_c0	2.05281	5.57112	7.95944e-05	1.44464	up	--	--	K04508|1e-36|vvi:100256008|hypothetical protein LOC100256008	Myb-like protein X OS=Dictyostelium discoideum GN=mybX PE=3 SV=1	PREDICTED: F-box-like/WD repeat-containing protein ebi-like [Solanum lycopersicum]
c35771.graph_c0	3.71184	7.87361	9.84225e-08	1.10989	up	--	Molecular Function: NADH dehydrogenase (ubiquinone) activity (GO:0008137);; Cellular Component: chloroplast (GO:0009507);; Cellular Component: integral component of membrane (GO:0016021);; Biological Process: ATP synthesis coupled electron transport (GO:0042773);; Molecular Function: quinone binding (GO:0048038);;	K05577|0.0|pop:Poptr_cp077|ndhF	NAD(P)H-quinone oxidoreductase subunit 5, chloroplastic OS=Tecoma stans GN=ndhF PE=3 SV=1	NADH-plastoquinone oxidoreductase subunit 5 protein [Antirrhinum majus]
c44453.graph_c0	0	2.19515	0.000117564	4.45415	up	--	Cellular Component: nucleus (GO:0005634);;	--	--	hypothetical protein M569_00397 [Genlisea aurea]
c27928.graph_c0	15.978	33.1667	5.3027e-09	1.08038	up	Energy production and conversion	Cellular Component: vacuole (GO:0005773);; Cellular Component: plasma membrane (GO:0005886);; Biological Process: glycerol metabolic process (GO:0006071);; Biological Process: lipid metabolic process (GO:0006629);; Molecular Function: glycerophosphodiester phosphodiesterase activity (GO:0008889);; Molecular Function: glycerophosphocholine phosphodiesterase activity (GO:0047389);;	K01126|0.0|vvi:100260480|hypothetical protein LOC100260480	Glycerophosphoryl diester phosphodiesterase OS=Escherichia coli (strain K12) GN=glpQ PE=1 SV=2	PREDICTED: glycerophosphoryl diester phosphodiesterase-like [Solanum lycopersicum]
c18515.graph_c0	13.0424	25.7867	0.00233203	1.0032	up	--	Biological Process: maltose metabolic process (GO:0000023);; Molecular Function: enzyme inhibitor activity (GO:0004857);; Cellular Component: cytosol (GO:0005829);; Biological Process: pentose-phosphate shunt (GO:0006098);; Biological Process: regulation of carbohydrate metabolic process (GO:0006109);; Biological Process: glycerol ether metabolic process (GO:0006662);; Molecular Function: enzyme …	--	Thioredoxin F1, chloroplastic OS=Arabidopsis thaliana GN=At3g02730 PE=1 SV=2	thioredoxin F-type 1 [Arabidopsis thaliana]
c41987.graph_c0	13.3442	29.3392	2.09831e-08	1.16128	up	Function unknown	Cellular Component: chloroplast inner membrane (GO:0009706);;	--	--	PREDICTED: uncharacterized protein LOC101255031 [Solanum lycopersicum]
c10960.graph_c0	0.0802107	1.90675	0.00123494	3.55675	up	--	Biological Process: metabolic process (GO:0008152);; Cellular Component: plastid (GO:0009536);; Molecular Function: oxidoreductase activity (GO:0016491);;	--	Polyphenol oxidase, chloroplastic OS=Vitis vinifera PE=1 SV=1	polyphenol oxidase, partial [Genlisea aurea]
c23712.graph_c0	2.60905	10.3996	4.63207e-12	1.99602	up	--	--	--	Protein TIFY 5A OS=Arabidopsis thaliana GN=TIFY5A PE=1 SV=1	Jasmonate-zim-domain protein 8, putative [Theobroma cacao]
c36448.graph_c0	4.28388	21.3291	0	2.31853	up	--	Cellular Component: chloroplast (GO:0009507);; Molecular Function: heat shock protein binding (GO:0031072);; Molecular Function: unfolded protein binding (GO:0051082);;	--	--	DnaJ/Hsp40 cysteine-rich domain superfamily protein isoform 1 [Theobroma cacao]
c39789.graph_c0	9.25885	19.3508	0.00176057	1.08061	up	Secondary metabolites biosynthesis, transport and catabolism	Cellular Component: vacuole (GO:0005773);; Cellular Component: plasma membrane (GO:0005886);; Biological Process: response to water deprivation (GO:0009414);; Biological Process: carotene catabolic process (GO:0016121);; Biological Process: xanthophyll catabolic process (GO:0016124);; Molecular Function: 9-cis-epoxycarotenoid dioxygenase activity (GO:0045549);;	K11159|1e-51|pop:POPTR_706412|9-cis-epoxycarotenoid dioxygenase (EC:1.13.11.51)	Carotenoid 9,10(9&apos;,10&apos;)-cleavage dioxygenase 1 OS=Pisum sativum GN=CCD1 PE=2 SV=1	carotenoid cleavage dioxygenase 1 [Osmanthus fragrans]
c31111.graph_c1	0.0823107	1.64538	7.10445e-07	3.73077	up	--	--	--	--	PREDICTED: uncharacterized protein LOC101508631 [Cicer arietinum]
c16677.graph_c0	0.719585	6.49472	0	3.11818	up	--	Cellular Component: cytosol (GO:0005829);; Biological Process: monoterpenoid biosynthetic process (GO:0016099);; Molecular Function: protein homodimerization activity (GO:0042803);; Molecular Function: delta4-3-oxosteroid 5beta-reductase activity (GO:0047787);; Biological Process: oxidation-reduction process (GO:0055114);;	--	Iridoid synthase OS=Catharanthus roseus PE=1 SV=1	progesterone 5beta-reductase 2 [Digitalis purpurea]
c17000.graph_c0	2.25796	6.65402	0.000112248	1.55483	up	--	--	--	--	hypothetical protein M569_17358 [Genlisea aurea]
c26742.graph_c0	4.34186	9.46836	0.00519997	1.13699	up	Amino acid transport and metabolism	Molecular Function: threonine synthase activity (GO:0004795);; Cellular Component: cytosol (GO:0005829);; Biological Process: threonine biosynthetic process (GO:0009088);; Cellular Component: chloroplast stroma (GO:0009570);; Molecular Function: pyridoxal phosphate binding (GO:0030170);;	K01733|1e-120|pop:POPTR_1113710|threonine synthase (EC:4.2.3.1)	Threonine synthase, chloroplastic OS=Solanum tuberosum PE=2 SV=1	predicted protein [Populus trichocarpa]
c19513.graph_c0	5.82031	11.9064	0.000401442	1.05286	up	General function prediction only	Biological Process: metabolic process (GO:0008152);; Cellular Component: chloroplast (GO:0009507);; Molecular Function: hydrolase activity (GO:0016787);;	--	4,5:9,10-diseco-3-hydroxy-5,9,17-trioxoandrosta-1(10),2-diene-4-oate hydrolase OS=Mycobacterium tuberculosis GN=hsaD PE=1 SV=1	PREDICTED: 2-hydroxy-6-oxononadienedioate/2-hydroxy-6-oxononatrienedioate hydrolase-like [Solanum lycopersicum]
c42354.graph_c0	1.91552	4.44246	0.00896715	1.21921	up	--	--	--	GDSL esterase/lipase At1g29670 OS=Arabidopsis thaliana GN=At1g29670 PE=2 SV=1	PREDICTED: GDSL esterase/lipase At1g29670-like [Solanum lycopersicum]
c23796.graph_c0	0.636113	3.43671	0.000608906	2.30457	up	--	--	--	--	PTP-1 [Craterostigma plantagineum]
c37993.graph_c0	5.12292	13.1647	8.46356e-12	1.38497	up	Posttranslational modification, protein turnover, chaperones	Biological Process: maltose metabolic process (GO:0000023);; Molecular Function: ATP binding (GO:0005524);; Biological Process: phosphatidylglycerol biosynthetic process (GO:0006655);; Cellular Component: chloroplast stroma (GO:0009570);; Cellular Component: chloroplast envelope (GO:0009941);; Biological Process: mRNA modification (GO:0016556);; Biological Process: starch biosynthetic process (GO…	--	Chaperonin 60 subunit beta 4, chloroplastic OS=Arabidopsis thaliana GN=CPN60B4 PE=1 SV=1	PREDICTED: chaperonin 60 subunit beta 4, chloroplastic-like [Vitis vinifera]
c41496.graph_c0	4.41777	11.6321	6.38922e-08	1.41344	up	--	Cellular Component: nucleus (GO:0005634);; Biological Process: signal transduction (GO:0007165);; Biological Process: response to water deprivation (GO:0009414);; Biological Process: response to abscisic acid (GO:0009737);; Biological Process: embryo development ending in seed dormancy (GO:0009793);; Biological Process: response to chitin (GO:0010200);; Biological Process: hyperosmotic salinity r…	--	Zinc finger protein AZF2 OS=Arabidopsis thaliana GN=AZF2 PE=2 SV=1	zinc finger protein, putative [Ricinus communis]
c36589.graph_c0	11.4717	23.4211	4.70705e-06	1.05385	up	--	Cellular Component: chloroplast thylakoid lumen (GO:0009543);; Biological Process: stomatal complex morphogenesis (GO:0010103);; Biological Process: glucosinolate biosynthetic process (GO:0019761);;	--	Thylakoid lumenal 17.9 kDa protein, chloroplastic OS=Arabidopsis thaliana GN=At4g24930 PE=1 SV=1	PREDICTED: thylakoid lumenal 17.9 kDa protein, chloroplastic-like [Solanum lycopersicum]
c38985.graph_c0	0.691009	1.8546	0.00246277	1.41962	up	--	Molecular Function: nucleic acid binding (GO:0003676);; Molecular Function: transferase activity, transferring phosphorus-containing groups (GO:0016772);; Biological Process: primary metabolic process (GO:0044238);; Biological Process: cellular macromolecule metabolic process (GO:0044260);;	--	Retrovirus-related Pol polyprotein LINE-1 OS=Mus musculus GN=Pol PE=1 SV=2	PREDICTED: uncharacterized protein LOC100804594 [Glycine max]
c21944.graph_c0	0.834357	3.51605	1.47287e-06	2.04193	up	--	Molecular Function: DNA binding (GO:0003677);; Cellular Component: nucleus (GO:0005634);; Biological Process: regulation of transcription, DNA-templated (GO:0006355);; Biological Process: flower development (GO:0009908);; Biological Process: determination of dorsal/ventral asymmetry (GO:0048262);;	--	Transcription factor DICHOTOMA OS=Antirrhinum majus GN=DICH PE=2 SV=1	RecName: Full=Transcription factor DICHOTOMA
c30427.graph_c0	3.22298	7.62843	0.00458995	1.24878	up	--	--	--	--	Uncharacterized protein TCM_015287 [Theobroma cacao]
c36901.graph_c0	3.09469	6.6364	0.00251455	1.11549	up	--	--	--	Pentatricopeptide repeat-containing protein At2g15690 OS=Arabidopsis thaliana GN=PCMP-H66 PE=2 SV=2	unnamed protein product [Vitis vinifera]
c4746.graph_c0	0.104256	2.19672	2.08461e-07	3.80467	up	General function prediction only	Molecular Function: iron ion binding (GO:0005506);; Molecular Function: oxidoreductase activity, acting on single donors with incorporation of molecular oxygen, incorporation of two atoms of oxygen (GO:0016702);; Molecular Function: oxidoreductase activity, acting on paired donors, with incorporation or reduction of molecular oxygen, 2-oxoglutarate as one donor, and incorporation of one atom each…	--	Leucoanthocyanidin dioxygenase OS=Malus domestica GN=ANS PE=2 SV=1	PREDICTED: codeine O-demethylase-like [Glycine max]
c36989.graph_c0	6.36261	12.9139	3.84692e-05	1.0441	up	Lipid transport and metabolism	Biological Process: long-chain fatty acid metabolic process (GO:0001676);; Biological Process: defense response to insect (GO:0002213);; Biological Process: unsaturated fatty acid biosynthetic process (GO:0006636);; Biological Process: phosphatidylglycerol biosynthetic process (GO:0006655);; Cellular Component: chloroplast (GO:0009507);; Cellular Component: thylakoid (GO:0009579);; Molecular Func…	K00507|1e-113|rcu:RCOM_0900580|delta 9 desaturase, putative (EC:1.14.19.1)	Palmitoyl-monogalactosyldiacylglycerol delta-7 desaturase, chloroplastic OS=Arabidopsis thaliana GN=ADS3 PE=2 SV=2	PREDICTED: palmitoyl-monogalactosyldiacylglycerol delta-7 desaturase, chloroplastic-like [Solanum lycopersicum]
c38560.graph_c1	0.920631	7.77732	0	3.04197	up	--	--	--	Putative ribonuclease H protein At1g65750 OS=Arabidopsis thaliana GN=At1g65750 PE=3 SV=1	hypothetical protein PRUPE_ppa024472mg, partial [Prunus persica]
c28825.graph_c2	4.0746	10.8693	1.64114e-06	1.42787	up	--	--	--	Putative ribonuclease H protein At1g65750 OS=Arabidopsis thaliana GN=At1g65750 PE=3 SV=1	hypothetical protein PRUPE_ppb016510mg, partial [Prunus persica]
c18109.graph_c0	0.680005	5.58424	5.18851e-05	2.805	up	General function prediction only	Molecular Function: zinc ion binding (GO:0008270);; Biological Process: response to bacterium (GO:0009617);; Biological Process: plant-type hypersensitive response (GO:0009626);; Biological Process: lignin biosynthetic process (GO:0009809);; Molecular Function: aryl-alcohol dehydrogenase (NAD+) activity (GO:0018456);; Molecular Function: cinnamyl-alcohol dehydrogenase activity (GO:0045551);; Mole…	--	8-hydroxygeraniol dehydrogenase OS=Catharanthus roseus GN=10HGO PE=1 SV=1	sinapyl alcohol dehydrogenase [Plantago major]
c32564.graph_c0	0.333662	4.74703	5.42899e-14	3.62349	up	--	Molecular Function: cysteine-type peptidase activity (GO:0008234);; Biological Process: macromolecule metabolic process (GO:0043170);; Biological Process: primary metabolic process (GO:0044238);; Cellular Component: apoplast (GO:0048046);;	--	Metacaspase-9 OS=Arabidopsis thaliana GN=AMC9 PE=1 SV=1	PREDICTED: metacaspase-9-like [Cicer arietinum]
c28067.graph_c0	5.49612	12.8082	1.60478e-07	1.24207	up	--	--	--	WAT1-related protein At4g15540 OS=Arabidopsis thaliana GN=At4g15540 PE=2 SV=1	PREDICTED: auxin-induced protein 5NG4-like [Fragaria vesca subsp. vesca]
c35542.graph_c0	0.222588	2.5254	2.79332e-10	3.30179	up	--	Molecular Function: ferric-chelate reductase activity (GO:0000293);; Cellular Component: extracellular region (GO:0005576);; Cellular Component: integral component of membrane (GO:0016021);; Molecular Function: NAD(P)H oxidase activity (GO:0016174);; Molecular Function: ion binding (GO:0043167);; Biological Process: oxidation-reduction process (GO:0055114);;	--	Ferric reduction oxidase 5 OS=Arabidopsis thaliana GN=FRO5 PE=2 SV=1	PREDICTED: ferric reduction oxidase 4-like, partial [Solanum lycopersicum]
c36779.graph_c0	2.12869	5.63133	7.15182e-06	1.41428	up	--	Biological Process: amino acid transmembrane transport (GO:0003333);; Cellular Component: plasma membrane (GO:0005886);; Biological Process: N-terminal protein myristoylation (GO:0006499);; Biological Process: protein targeting to membrane (GO:0006612);; Biological Process: nucleotide transport (GO:0006862);; Biological Process: ER to Golgi vesicle-mediated transport (GO:0006888);; Cellular Compo…	--	Lysine histidine transporter 1 OS=Arabidopsis thaliana GN=LHT1 PE=1 SV=1	PREDICTED: lysine histidine transporter 1-like [Solanum lycopersicum]
c7427.graph_c0	0	2.97469	2.96559e-05	4.57418	up	Carbohydrate transport and metabolism	Molecular Function: fructose-bisphosphate aldolase activity (GO:0004332);; Molecular Function: copper ion binding (GO:0005507);; Cellular Component: cell wall (GO:0005618);; Cellular Component: nucleolus (GO:0005730);; Cellular Component: mitochondrial envelope (GO:0005740);; Cellular Component: cytosol (GO:0005829);; Cellular Component: plasma membrane (GO:0005886);; Biological Process: glycolys…	K01623|1e-111|osa:4338737|Os05g0402700	Fructose-bisphosphate aldolase cytoplasmic isozyme OS=Oryza sativa subsp. japonica GN=FBA PE=1 SV=2	Fructose-bisphosphate aldolase cytoplasmic isozyme [Aegilops tauschii]
c16359.graph_c0	0.733679	4.84468	1.08457e-06	2.60439	up	--	Cellular Component: plasma membrane (GO:0005886);; Biological Process: protein targeting to membrane (GO:0006612);; Biological Process: nucleotide transport (GO:0006862);; Biological Process: ER to Golgi vesicle-mediated transport (GO:0006888);; Biological Process: regulation of plant-type hypersensitive response (GO:0010363);; Molecular Function: acidic amino acid transmembrane transporter activ…	--	Amino acid permease 3 OS=Arabidopsis thaliana GN=AAP3 PE=1 SV=2	hypothetical protein VITISV_005276 [Vitis vinifera]
c37459.graph_c0	1.54646	12.9967	0	3.05946	up	--	Molecular Function: protein kinase activity (GO:0004672);; Biological Process: cellular process (GO:0009987);; Biological Process: response to stimulus (GO:0050896);;	--	Mitogen-activated protein kinase kinase kinase NPK1 OS=Nicotiana tabacum GN=NPK1 PE=1 SV=1	PREDICTED: mitogen-activated protein kinase kinase kinase 3-like [Solanum lycopersicum]
c41783.graph_c0	16.5998	33.4787	6.98754e-08	1.03859	up	--	Biological Process: transcription, DNA-templated (GO:0006351);; Cellular Component: chloroplast (GO:0009507);; Biological Process: response to abscisic acid (GO:0009737);; Biological Process: chloroplast mRNA processing (GO:0010239);; Molecular Function: rRNA binding (GO:0019843);; Molecular Function: protein self-association (GO:0043621);; Biological Process: chloroplast rRNA processing (GO:1901…	--	Rho-N domain-containing protein 1, chloroplastic OS=Arabidopsis thaliana GN=RHON1 PE=1 SV=1	PREDICTED: SAP-like protein BP-73-like [Vitis vinifera]
c22940.graph_c1	1.64497	5.75553	0.000157103	1.78019	up	--	Molecular Function: iron ion binding (GO:0005506);; Cellular Component: cytoplasmic membrane-bounded vesicle (GO:0016023);; Biological Process: secretion by cell (GO:0032940);; Biological Process: gibberellin catabolic process (GO:0045487);; Molecular Function: C-19 gibberellin 2-beta-dioxygenase activity (GO:0052634);; Biological Process: oxidation-reduction process (GO:0055114);;	--	Gibberellin 2-beta-dioxygenase 1 OS=Pisum sativum GN=GA2OX1 PE=1 SV=1	gibberellin 2-oxidase [Helianthus annuus]
c34712.graph_c0	2.11981	9.40974	1.34537e-12	2.14433	up	--	Molecular Function: transferase activity (GO:0016740);; Biological Process: organic substance metabolic process (GO:0071704);;	--	--	PREDICTED: uncharacterized protein LOC100241338 [Vitis vinifera]
c24664.graph_c0	33.1612	96.1839	0	1.5628	up	Signal transduction mechanisms	Biological Process: response to molecule of fungal origin (GO:0002238);; Cellular Component: nucleus (GO:0005634);; Cellular Component: vacuole (GO:0005773);; Biological Process: response to stress (GO:0006950);;	--	Universal stress protein A-like protein OS=Arabidopsis thaliana GN=At3g01520 PE=1 SV=2	PREDICTED: universal stress protein A-like protein [Vitis vinifera]
c19484.graph_c0	8.01337	16.2172	1.01114e-05	1.04097	up	--	Molecular Function: purine nucleobase transmembrane transporter activity (GO:0005345);; Cellular Component: cytoplasm (GO:0005737);; Biological Process: purine nucleobase transport (GO:0006863);; Biological Process: response to nematode (GO:0009624);; Biological Process: nucleobase-containing compound transport (GO:0015931);; Cellular Component: membrane (GO:0016020);;	--	Probable purine permease 10 OS=Arabidopsis thaliana GN=PUP10 PE=2 SV=2	hypothetical protein M569_05883, partial [Genlisea aurea]
c25970.graph_c0	7.06135	15.2193	3.64308e-07	1.1317	up	General function prediction only	Molecular Function: protein binding (GO:0005515);; Cellular Component: nucleus (GO:0005634);; Cellular Component: mitochondrion (GO:0005739);; Biological Process: embryo development ending in seed dormancy (GO:0009793);; Biological Process: thylakoid membrane organization (GO:0010027);;	--	Ankyrin repeat domain-containing protein EMB506, chloroplastic OS=Arabidopsis thaliana GN=EMB506 PE=1 SV=1	PREDICTED: ankyrin repeat domain-containing protein EMB506, chloroplastic [Vitis vinifera]
c18739.graph_c0	6.11307	34.3003	0	2.50043	up	--	--	--	Dirigent protein 21 OS=Arabidopsis thaliana GN=DIR21 PE=1 SV=1	PREDICTED: uncharacterized protein LOC101251429 [Solanum lycopersicum]
c30196.graph_c0	2.66929	5.99925	0.00467203	1.17845	up	--	Cellular Component: cell wall (GO:0005618);;	--	--	predicted protein [Populus trichocarpa]
c27400.graph_c0	9.84172	24.7677	1.55098e-13	1.35686	up	--	Molecular Function: sugar:hydrogen symporter activity (GO:0005351);; Cellular Component: integral component of membrane (GO:0016021);; Molecular Function: 2-alkenal reductase [NAD(P)] activity (GO:0032440);; Biological Process: carbohydrate transmembrane transport (GO:0034219);; Biological Process: oxidation-reduction process (GO:0055114);;	--	Hexose carrier protein HEX6 OS=Ricinus communis GN=HEX6 PE=2 SV=1	Major facilitator superfamily protein [Theobroma cacao]
c33393.graph_c0	3.38137	8.30385	5.49122e-06	1.31193	up	Posttranslational modification, protein turnover, chaperones	Molecular Function: metal ion binding (GO:0046872);;	--	RING-H2 finger protein ATL16 OS=Arabidopsis thaliana GN=ATL16 PE=2 SV=1	RING/U-box superfamily protein [Theobroma cacao]
c19687.graph_c0	37.8899	76.0092	6.23985e-09	1.03183	up	Inorganic ion transport and metabolism	Molecular Function: carbonate dehydratase activity (GO:0004089);; Cellular Component: cytosol (GO:0005829);; Molecular Function: zinc ion binding (GO:0008270);; Biological Process: response to cold (GO:0009409);; Cellular Component: chloroplast thylakoid membrane (GO:0009535);; Cellular Component: chloroplast stroma (GO:0009570);; Biological Process: defense response to fungus, incompatible inter…	K01673|1e-86|rcu:RCOM_1095240|carbonic anhydrase, putative (EC:4.2.1.1)	Carbonic anhydrase, chloroplastic OS=Nicotiana tabacum PE=2 SV=1	beta-carbonic anhydrase [Nicotiana tabacum]
c36291.graph_c0	0.464219	1.59333	0.00223767	1.74051	up	--	Molecular Function: nucleotide binding (GO:0000166);; Molecular Function: protein serine/threonine kinase activity (GO:0004674);; Biological Process: response to abscisic acid (GO:0009737);; Biological Process: phosphorylation (GO:0016310);; Biological Process: single-organism process (GO:0044699);;	--	Lectin-domain containing receptor kinase VI.4 OS=Arabidopsis thaliana GN=LECRK64 PE=2 SV=1	PREDICTED: lectin-domain containing receptor kinase VI.3-like [Solanum lycopersicum]
c32842.graph_c0	7.22528	22.6605	0	1.67359	up	Posttranslational modification, protein turnover, chaperones	Biological Process: maltose metabolic process (GO:0000023);; Biological Process: phosphatidylglycerol biosynthetic process (GO:0006655);; Cellular Component: chloroplast thylakoid membrane (GO:0009535);; Biological Process: leaf morphogenesis (GO:0009965);; Biological Process: thylakoid membrane organization (GO:0010027);; Cellular Component: integral component of membrane (GO:0016021);; Biologic…	K07399|0.0|vvi:100265915|hypothetical protein LOC100265915	Cytochrome c biogenesis protein CCS1, chloroplastic OS=Arabidopsis thaliana GN=CCS1 PE=2 SV=1	PREDICTED: cytochrome c biogenesis protein CCS1, chloroplastic [Vitis vinifera]
c35347.graph_c0	9.57155	24.6344	2.70561e-13	1.38846	up	Inorganic ion transport and metabolism	Molecular Function: superoxide dismutase activity (GO:0004784);; Molecular Function: protein binding (GO:0005515);; Cellular Component: thylakoid (GO:0009579);; Biological Process: removal of superoxide radicals (GO:0019430);; Cellular Component: chloroplast nucleoid (GO:0042644);; Molecular Function: metal ion binding (GO:0046872);; Biological Process: oxidation-reduction process (GO:0055114);;	--	Superoxide dismutase [Fe] 3, chloroplastic OS=Arabidopsis thaliana GN=FSD3 PE=1 SV=1	PREDICTED: superoxide dismutase [Fe], chloroplastic [Vitis vinifera]
c16754.graph_c0	10.7621	28.2909	2.9643e-14	1.41915	up	General function prediction only	Biological Process: rRNA processing (GO:0006364);; Cellular Component: chloroplast thylakoid (GO:0009534);; Biological Process: plastid organization (GO:0009657);; Cellular Component: chloroplast envelope (GO:0009941);; Biological Process: photosystem II assembly (GO:0010207);; Biological Process: myo-inositol hexakisphosphate biosynthetic process (GO:0010264);; Molecular Function: hydrolase acti…	--	Uncharacterized hydrolase YugF OS=Bacillus subtilis (strain 168) GN=yugF PE=3 SV=1	PREDICTED: epoxide hydrolase 4-like isoform 1 [Solanum lycopersicum]
c28555.graph_c0	5.28491	12.701	0.000198236	1.27683	up	--	Molecular Function: ubiquitin-protein ligase activity (GO:0004842);; Molecular Function: protein binding (GO:0005515);; Biological Process: response to salt stress (GO:0009651);; Biological Process: positive regulation of abscisic acid-activated signaling pathway (GO:0009789);; Biological Process: protein ubiquitination (GO:0016567);; Biological Process: regulation of response to osmotic stress (…	--	E3 ubiquitin-protein ligase RHA2A OS=Arabidopsis thaliana GN=RHA2A PE=1 SV=1	PREDICTED: E3 ubiquitin-protein ligase RHA2A-like [Fragaria vesca subsp. vesca]
c35331.graph_c0	24.5957	52.2917	4.79424e-11	1.11581	up	Energy production and conversion	Cellular Component: mitochondrion (GO:0005739);; Cellular Component: vacuole (GO:0005773);; Cellular Component: plasma membrane (GO:0005886);; Biological Process: response to oxidative stress (GO:0006979);; Molecular Function: UDP-N-acetylmuramate dehydrogenase activity (GO:0008762);; Cellular Component: plant-type cell wall (GO:0009505);; Cellular Component: apoplast (GO:0048046);; Molecular Fun…	--	Reticuline oxidase-like protein OS=Arabidopsis thaliana GN=At4g20830 PE=1 SV=2	hypothetical protein VITISV_003752 [Vitis vinifera]
c33914.graph_c0	9.41329	19.4001	1.54621e-08	1.06983	up	Transcription	Cellular Component: mitochondrion (GO:0005739);; Cellular Component: chloroplast (GO:0009507);;	--	Pentatricopeptide repeat-containing protein At5g42310, mitochondrial OS=Arabidopsis thaliana GN=At5g42310 PE=2 SV=1	PREDICTED: pentatricopeptide repeat-containing protein At5g42310, mitochondrial-like [Solanum lycopersicum]
c31363.graph_c0	10.7895	21.3142	6.09589e-05	1.00572	up	--	--	--	--	PREDICTED: uncharacterized protein LOC101246579 [Solanum lycopersicum]
c38389.graph_c0	2.20068	6.71412	1.38334e-07	1.61599	up	--	Molecular Function: DNA binding (GO:0003677);; Biological Process: transcription, DNA-templated (GO:0006351);; Biological Process: flower development (GO:0009908);; Biological Process: regulation of cellular process (GO:0050794);;	K14431|1e-138|vvi:100249239|hypothetical protein LOC100249239	Transcription factor PERIANTHIA OS=Arabidopsis thaliana GN=PAN PE=1 SV=1	PREDICTED: transcription factor HBP-1b(c1)-like [Vitis vinifera]
c35236.graph_c0	1.38944	16.6434	0	3.56795	up	General function prediction only	Molecular Function: iron ion binding (GO:0005506);; Molecular Function: oxidoreductase activity, acting on single donors with incorporation of molecular oxygen, incorporation of two atoms of oxygen (GO:0016702);; Molecular Function: leucocyanidin oxygenase activity (GO:0050589);; Biological Process: oxidation-reduction process (GO:0055114);; Biological Process: response to karrikin (GO:0080167);;	--	Protein SRG1 OS=Arabidopsis thaliana GN=SRG1 PE=2 SV=1	predicted protein [Populus trichocarpa]
c35730.graph_c0	8.8212	30.0959	0	1.79607	up	Signal transduction mechanisms	Molecular Function: core promoter binding (GO:0001047);; Molecular Function: ubiquitin-protein ligase activity (GO:0004842);; Molecular Function: signal transducer activity (GO:0004871);; Molecular Function: protein binding (GO:0005515);; Cellular Component: nucleus (GO:0005634);; Biological Process: regulation of transcription, DNA-templated (GO:0006355);; Biological Process: ubiquitin-dependent…	--	Adagio protein 3 OS=Arabidopsis thaliana GN=ADO3 PE=1 SV=1	flavin-binding, kelch repeat, f-box 1/adagio3 [Nicotiana attenuata]
c27670.graph_c0	159.143	471.427	0	1.59511	up	General function prediction only	Molecular Function: poly(U) RNA binding (GO:0008266);; Biological Process: response to cold (GO:0009409);; Cellular Component: chloroplast thylakoid membrane (GO:0009535);; Cellular Component: chloroplast stroma (GO:0009570);; Biological Process: salicylic acid biosynthetic process (GO:0009697);; Biological Process: response to abscisic acid (GO:0009737);; Biological Process: defense response, in…	--	29 kDa ribonucleoprotein A, chloroplastic OS=Nicotiana sylvestris PE=2 SV=1	RecName: Full=29 kDa ribonucleoprotein A, chloroplastic; AltName: Full=CP29A; Flags: Precursor
c28891.graph_c0	1.06879	3.29961	0.00307113	1.60254	up	--	--	--	Zinc finger protein CONSTANS-LIKE 12 OS=Arabidopsis thaliana GN=COL12 PE=2 SV=2	PREDICTED: uncharacterized protein LOC100241849 [Vitis vinifera]
c42262.graph_c0	5.2406	12.0331	0.000357342	1.2131	up	--	Cellular Component: chloroplast (GO:0009507);;	--	--	PREDICTED: uncharacterized protein LOC100255936 [Vitis vinifera]
c41348.graph_c0	6.08982	16.4507	1.18337e-08	1.45061	up	--	Biological Process: response to stress (GO:0006950);; Biological Process: response to abiotic stimulus (GO:0009628);;	--	Zinc finger protein ZAT10 OS=Arabidopsis thaliana GN=ZAT10 PE=2 SV=1	predicted protein [Populus trichocarpa]
c42016.graph_c0	12.7749	30.0056	3.05028e-10	1.25647	up	--	Biological Process: pentose-phosphate shunt (GO:0006098);; Biological Process: rRNA processing (GO:0006364);; Cellular Component: chloroplast (GO:0009507);; Biological Process: response to blue light (GO:0009637);; Biological Process: response to high light intensity (GO:0009644);; Biological Process: response to sucrose (GO:0009744);; Biological Process: photosynthesis, light harvesting (GO:0009…	K08908|1e-160|vvi:100243962|hypothetical protein LOC100243962	Chlorophyll a-b binding protein, chloroplastic OS=Petunia hybrida PE=2 SV=1	PREDICTED: chlorophyll a-b binding protein, chloroplastic [Vitis vinifera]
c26088.graph_c0	0.72921	1.87135	0.00545464	1.35684	up	--	Cellular Component: plastid (GO:0009536);;	--	Pentatricopeptide repeat-containing protein At4g20770 OS=Arabidopsis thaliana GN=PCMP-E35 PE=3 SV=2	Pentatricopeptide repeat superfamily protein, putative isoform 1 [Theobroma cacao]
c18372.graph_c0	0.369578	3.46097	0.00288274	2.84177	up	Inorganic ion transport and metabolism	Cellular Component: cytosol (GO:0005829);; Biological Process: protein folding (GO:0006457);; Biological Process: response to heat (GO:0009408);; Biological Process: response to high light intensity (GO:0009644);; Molecular Function: L-ascorbate peroxidase activity (GO:0016688);; Molecular Function: heme binding (GO:0020037);; Biological Process: response to hydrogen peroxide (GO:0042542);; Biolo…	K00434|1e-107|pop:POPTR_1103794|hypothetical protein	L-ascorbate peroxidase, cytosolic OS=Pisum sativum GN=APX1 PE=1 SV=2	PREDICTED: L-ascorbate peroxidase 2, cytosolic-like [Solanum lycopersicum]
c35015.graph_c1	11.756	25.1382	0.000152078	1.1157	up	Defense mechanisms	Cellular Component: vacuole (GO:0005773);; Cellular Component: plasma membrane (GO:0005886);; Biological Process: drug transmembrane transport (GO:0006855);; Biological Process: response to nematode (GO:0009624);; Molecular Function: drug transmembrane transporter activity (GO:0015238);; Molecular Function: antiporter activity (GO:0015297);;	--	Protein TRANSPARENT TESTA 12 OS=Arabidopsis thaliana GN=TT12 PE=2 SV=1	PREDICTED: protein TRANSPARENT TESTA 12-like [Solanum lycopersicum]
c23961.graph_c0	24.7001	63.6825	1.11022e-16	1.3931	up	--	Molecular Function: organic cyclic compound binding (GO:0097159);; Molecular Function: heterocyclic compound binding (GO:1901363);;	--	Probable WRKY transcription factor 70 OS=Arabidopsis thaliana GN=WRKY70 PE=2 SV=1	WRKY DNA-binding protein 70, putative isoform 1 [Theobroma cacao]
c30512.graph_c0	31.1434	69.5465	2.06057e-13	1.18705	up	--	Biological Process: regulation of transcription, DNA-templated (GO:0006355);;	--	Chitin-inducible gibberellin-responsive protein 1 OS=Oryza sativa subsp. japonica GN=CIGR1 PE=2 SV=1	GRAS family transcription factor [Populus trichocarpa]
c31816.graph_c0	0.595673	3.10464	1.94932e-08	2.33373	up	Inorganic ion transport and metabolism	Molecular Function: catalase activity (GO:0004096);; Cellular Component: cell wall (GO:0005618);; Cellular Component: mitochondrion (GO:0005739);; Cellular Component: vacuole (GO:0005773);; Cellular Component: plasma membrane (GO:0005886);; Cellular Component: plasmodesma (GO:0009506);; Cellular Component: glyoxysome (GO:0009514);; Cellular Component: chloroplast stroma (GO:0009570);; Biological …	K03781|0.0|osa:4328073|Os02g0115700	Catalase isozyme 2 OS=Hordeum vulgare GN=CAT2 PE=2 SV=1	catalase 2 [Elaeis guineensis]
c16178.graph_c0	0.570833	3.54663	3.84109e-08	2.55277	up	General function prediction only	Biological Process: vacuole organization (GO:0007033);; Biological Process: anthocyanin-containing compound biosynthetic process (GO:0009718);; Biological Process: proanthocyanidin biosynthetic process (GO:0010023);; Molecular Function: oxidoreductase activity, acting on single donors with incorporation of molecular oxygen, incorporation of two atoms of oxygen (GO:0016702);; Molecular Function: L…	K05277|0.0|vvi:100233142|LDOX, ANS	Leucoanthocyanidin dioxygenase OS=Perilla frutescens GN=ANS PE=2 SV=1	anthocyanidin synthase [Solenostemon scutellarioides]
c34361.graph_c0	16.9381	34.8974	2.25961e-08	1.06926	up	--	Cellular Component: intracellular (GO:0005622);;	--	Zinc finger protein CONSTANS-LIKE 10 OS=Arabidopsis thaliana GN=COL10 PE=1 SV=1	transcription factor, putative [Ricinus communis]
c39940.graph_c0	9.94648	20.3178	9.77804e-09	1.0574	up	Function unknown	--	--	TMV resistance protein N OS=Nicotiana glutinosa GN=N PE=1 SV=1	PREDICTED: TMV resistance protein N-like [Solanum lycopersicum]
c29185.graph_c0	5.99962	19.4111	0	1.71594	up	--	Cellular Component: cytosol (GO:0005829);; Biological Process: response to wounding (GO:0009611);; Molecular Function: hydrolase activity (GO:0016787);;	--	Nudix hydrolase 8 OS=Arabidopsis thaliana GN=NUDT8 PE=2 SV=2	PREDICTED: nudix hydrolase 8-like [Solanum lycopersicum]
c33944.graph_c0	0.445275	3.36795	0.00350541	2.63383	up	--	Biological Process: MAPK cascade (GO:0000165);; Biological Process: respiratory burst involved in defense response (GO:0002679);; Molecular Function: calcium ion binding (GO:0005509);; Biological Process: protein targeting to membrane (GO:0006612);; Biological Process: ethylene biosynthetic process (GO:0009693);; Biological Process: salicylic acid biosynthetic process (GO:0009697);; Biological Pr…	K13448|1e-60|rcu:RCOM_1677910|Polcalcin Jun o, putative	Calcium-binding protein CML38 OS=Arabidopsis thaliana GN=CML38 PE=2 SV=1	PREDICTED: uncharacterized protein LOC101293333 [Fragaria vesca subsp. vesca]
c32602.graph_c0	7.91731	21.3012	1.3393e-11	1.44943	up	General function prediction only	Molecular Function: nucleotide binding (GO:0000166);; Molecular Function: zinc ion binding (GO:0008270);; Biological Process: response to bacterium (GO:0009617);; Biological Process: plant-type hypersensitive response (GO:0009626);; Biological Process: lignin biosynthetic process (GO:0009809);; Molecular Function: aryl-alcohol dehydrogenase (NAD+) activity (GO:0018456);; Molecular Function: cinna…	K00083|0.0|pop:POPTR_667694|SAD	8-hydroxygeraniol dehydrogenase OS=Catharanthus roseus GN=10HGO PE=1 SV=1	hypothetical protein PRUPE_ppa007626mg [Prunus persica]
c24348.graph_c0	1.0418	2.83242	0.00179822	1.43798	up	Function unknown	--	--	Receptor-like protein 12 OS=Arabidopsis thaliana GN=RLP12 PE=2 SV=2	Receptor like protein 6 [Theobroma cacao]
c35740.graph_c0	2.27592	9.22203	5.55112e-16	2.02772	up	Amino acid transport and metabolism	Molecular Function: transporter activity (GO:0005215);; Biological Process: oligopeptide transport (GO:0006857);; Cellular Component: integral component of membrane (GO:0016021);;	K14638|0.0|pop:POPTR_752070|hypothetical protein	Peptide transporter PTR5 OS=Arabidopsis thaliana GN=PTR5 PE=2 SV=1	predicted protein [Populus trichocarpa]
c42500.graph_c0	2.08313	12.9895	0	2.64024	up	Energy production and conversion	Molecular Function: alcohol dehydrogenase (NAD) activity (GO:0004022);; Molecular Function: zinc ion binding (GO:0008270);; Biological Process: oxidation-reduction process (GO:0055114);;	--	Alcohol dehydrogenase-like 1 OS=Arabidopsis thaliana GN=At1g22430 PE=2 SV=1	alcohol dehydrogenase [Olea europaea]
c36580.graph_c0	4.34125	8.54602	4.55995e-05	1.00101	up	--	Molecular Function: zinc ion transmembrane transporter activity (GO:0005385);; Biological Process: polar nucleus fusion (GO:0010197);; Biological Process: response to chitin (GO:0010200);; Biological Process: zinc ion transmembrane transport (GO:0071577);;	--	--	hypothetical protein PRUPE_ppa003777mg [Prunus persica]
c33680.graph_c0	0.408554	6.62185	5.25908e-05	3.43748	up	--	Molecular Function: sequence-specific DNA binding transcription factor activity (GO:0003700);; Cellular Component: nucleus (GO:0005634);; Biological Process: regulation of transcription, DNA-templated (GO:0006355);; Biological Process: response to salt stress (GO:0009651);; Biological Process: regulation of gibberellin biosynthetic process (GO:0010371);; Biological Process: cell growth (GO:001604…	--	Dehydration-responsive element-binding protein 1F OS=Arabidopsis thaliana GN=DREB1F PE=2 SV=1	C-repeat binding facor [Fraxinus americana]
c35469.graph_c0	21.5886	44.1659	1.15708e-09	1.06021	up	--	Cellular Component: nucleus (GO:0005634);; Biological Process: cell proliferation (GO:0008283);; Cellular Component: chloroplast (GO:0009507);; Cellular Component: plastid chromosome (GO:0009508);; Biological Process: transcription from plastid promoter (GO:0042793);; Biological Process: positive regulation of transcription, DNA-templated (GO:0045893);;	--	--	Hop-interacting protein THI030 [Solanum lycopersicum]
c31956.graph_c0	14.5172	30.4075	7.59459e-09	1.09305	up	Energy production and conversion	Molecular Function: alditol:NADP+ 1-oxidoreductase activity (GO:0004032);; Cellular Component: chloroplast stroma (GO:0009570);; Cellular Component: chloroplast envelope (GO:0009941);; Biological Process: isopentenyl diphosphate biosynthetic process, methylerythritol 4-phosphate pathway (GO:0019288);; Biological Process: oxidation-reduction process (GO:0055114);;	--	Protein tas OS=Shigella flexneri GN=tas PE=3 SV=1	unnamed protein product [Vitis vinifera]
c43296.graph_c0	1.27877	2.71416	0.00925685	1.09859	up	--	Biological Process: oligopeptide transport (GO:0006857);; Cellular Component: membrane (GO:0016020);; Biological Process: transmembrane transport (GO:0055085);;	--	Oligopeptide transporter 5 OS=Arabidopsis thaliana GN=OPT5 PE=2 SV=1	hypothetical protein M569_13965 [Genlisea aurea]
