# Supplementary material for: Comparative transcription analysis of different Antirrhinum phyllotaxy nodes identifies major signal networks involved in vegetative-reproductive transition
Source: PLoS One. 2017 Jun 1;12(6):e0178424. doi: 10.1371/journal.pone.0178424 (PMC5453694; doi:10.1371/journal.pone.0178424)
Supplement: S9 Table — (XLS) [file pone.0178424.s011.xls]

## Sheet: T3_vs_T4.annotation
Table S9 DEGs annotated between T3 and T4
ID	T3	T4	FDR	log2FC	regulated	COG_class_annotation	GO_annotation	KEGG_annotation	Swissprot_annotation	nr_annotation
c29122.graph_c0	11.6317	1.04543	1.94722e-12	-3.33585	down	--	Molecular Function: protein binding (GO:0005515);; Cellular Component: plasma membrane (GO:0005886);; Cellular Component: anchored component of membrane (GO:0031225);; Biological Process: cellular metabolic process (GO:0044237);; Biological Process: root hair elongation (GO:0048767);; Biological Process: organic substance metabolic process (GO:0071704);;	--	Arabinogalactan peptide 13 OS=Arabidopsis thaliana GN=AGP13 PE=1 SV=1	predicted protein [Populus trichocarpa]
c24630.graph_c0	67.1693	24.9799	1.00397e-12	-1.48943	down	Translation, ribosomal structure and biogenesis	Molecular Function: translation elongation factor activity (GO:0003746);; Biological Process: translational elongation (GO:0006414);; Cellular Component: chloroplast stroma (GO:0009570);; Biological Process: embryo development ending in seed dormancy (GO:0009793);; Biological Process: iron-sulfur cluster assembly (GO:0016226);; Biological Process: peptide biosynthetic process (GO:0043043);; Biolo…	K02356|1e-108|vvi:100241479|hypothetical protein LOC100241479	Elongation factor P OS=Synechococcus sp. (strain ATCC 27264 / PCC 7002 / PR-6) GN=efp PE=3 SV=1	hypothetical protein M569_04054, partial [Genlisea aurea]
c37844.graph_c0	44.7371	18.821	6.66289e-10	-1.31214	down	Secondary metabolites biosynthesis, transport and catabolism	Molecular Function: iron ion binding (GO:0005506);; Biological Process: unsaturated fatty acid biosynthetic process (GO:0006636);; Molecular Function: electron carrier activity (GO:0009055);; Cellular Component: chloroplast envelope (GO:0009941);; Biological Process: leaf morphogenesis (GO:0009965);; Molecular Function: zeinoxanthin epsilon hydroxylase activity (GO:0009974);; Biological Process: …	K09837|0.0|rcu:RCOM_1352230|cytochrome P450, putative (EC:1.14.14.1)	Carotene epsilon-monooxygenase, chloroplastic OS=Arabidopsis thaliana GN=CYP97C1 PE=1 SV=1	cytochrome P450-type monooxygenase 97C11 [Solanum lycopersicum]
c33552.graph_c0	4.78479	0.852186	0.00123892	-2.34556	down	--	--	--	--	putative transposase [Antirrhinum majus]
c40431.graph_c0	296.919	93.0651	0	-1.73781	down	General function prediction only	Molecular Function: RNA binding (GO:0003723);; Biological Process: RNA metabolic process (GO:0016070);; Cellular Component: chloroplast part (GO:0044434);;	--	31 kDa ribonucleoprotein, chloroplastic OS=Nicotiana sylvestris PE=1 SV=1	RecName: Full=31 kDa ribonucleoprotein, chloroplastic; Flags: Precursor
c26084.graph_c0	6.3908	2.70649	6.35082e-07	-1.29718	down	--	Biological Process: response to light stimulus (GO:0009416);; Biological Process: RNA modification (GO:0009451);; Cellular Component: chloroplast (GO:0009507);; Biological Process: chloroplast organization (GO:0009658);; Biological Process: growth (GO:0040007);;	--	Pentatricopeptide repeat-containing protein At1g15510, chloroplastic OS=Arabidopsis thaliana GN=PCMP-H73 PE=2 SV=1	PREDICTED: pentatricopeptide repeat-containing protein At1g15510, chloroplastic-like [Solanum lycopersicum]
c32755.graph_c0	9.96832	4.56729	4.40906e-05	-1.18254	down	Amino acid transport and metabolism	Molecular Function: L-aspartate:2-oxoglutarate aminotransferase activity (GO:0004069);; Biological Process: biosynthetic process (GO:0009058);; Molecular Function: pyridoxal phosphate binding (GO:0030170);; Molecular Function: L-phenylalanine:2-oxoglutarate aminotransferase activity (GO:0080130);;	--	Methionine aminotransferase OS=Escherichia coli (strain K12) GN=ybdL PE=1 SV=1	hypothetical protein M569_12284 [Genlisea aurea]
c40441.graph_c0	243.224	108.643	1.08281e-08	-1.22613	down	Function unknown	Cellular Component: extracellular region (GO:0005576);; Biological Process: response to cold (GO:0009409);; Cellular Component: integral component of membrane (GO:0016021);; Biological Process: hyperosmotic salinity response (GO:0042538);; Biological Process: defense response to fungus (GO:0050832);;	--	UPF0057 membrane protein At2g24040 OS=Arabidopsis thaliana GN=At2g24040 PE=2 SV=1	hypothetical protein M569_05184, partial [Genlisea aurea]
c35664.graph_c0	85.6646	37.7472	5.65543e-09	-1.24568	down	General function prediction only	Cellular Component: cell wall (GO:0005618);; Biological Process: carbohydrate metabolic process (GO:0005975);; Biological Process: macromolecule catabolic process (GO:0009057);; Cellular Component: cytoplasmic membrane-bounded vesicle (GO:0016023);; Molecular Function: hydrolase activity, acting on glycosyl bonds (GO:0016798);; Biological Process: single-organism process (GO:0044699);;	--	Chitinase 5 OS=Oryza sativa subsp. japonica GN=Cht5 PE=2 SV=1	class IV chitinase [Nicotiana tabacum]
c26589.graph_c0	2.99093	0.818788	1.18354e-05	-1.87792	down	--	Cellular Component: mitochondrion (GO:0005739);; Biological Process: ceramide metabolic process (GO:0006672);; Cellular Component: chloroplast (GO:0009507);; Cellular Component: integral component of membrane (GO:0016021);; Molecular Function: transferase activity, transferring glycosyl groups (GO:0016757);;	--	--	predicted protein [Populus trichocarpa]
c41638.graph_c0	38.1205	12.7286	1.29896e-14	-1.64333	down	--	Molecular Function: hydrolase activity, acting on ester bonds (GO:0016788);;	--	Acetylajmalan esterase OS=Rauvolfia serpentina GN=AAE PE=1 SV=1	acetylajmalan acetylesterase [Striga asiatica]
c32626.graph_c0	2.50828	0.605794	9.64895e-13	-2.08755	down	--	Molecular Function: ion binding (GO:0043167);; Biological Process: primary metabolic process (GO:0044238);; Biological Process: cellular macromolecule metabolic process (GO:0044260);; Molecular Function: organic cyclic compound binding (GO:0097159);; Molecular Function: heterocyclic compound binding (GO:1901363);;	--	Retrovirus-related Pol polyprotein from transposon TNT 1-94 OS=Nicotiana tabacum PE=2 SV=1	hypothetical protein VITISV_004139 [Vitis vinifera]
c32806.graph_c3	2.93627	0.907174	4.43761e-05	-1.71462	down	--	--	--	--	hypothetical protein M569_17686, partial [Genlisea aurea]
c41723.graph_c0	25.3821	12.5645	8.64765e-05	-1.07414	down	Coenzyme transport and metabolism	Cellular Component: mitochondrion (GO:0005739);; Cellular Component: chloroplast (GO:0009507);; Biological Process: methylation (GO:0032259);; Biological Process: phylloquinone biosynthetic process (GO:0042372);; Molecular Function: 2-phytyl-1,4-naphthoquinone methyltransferase activity (GO:0052624);;	K06127|1e-123|pop:POPTR_420703|ubiquinone biosynthesis methyltransferase	2-phytyl-1,4-beta-naphthoquinone methyltransferase, chloroplastic OS=Arabidopsis thaliana GN=MENG PE=1 SV=2	PREDICTED: 2-phytyl-1,4-beta-naphthoquinone methyltransferase, chloroplastic-like [Solanum lycopersicum]
c30181.graph_c0	5.19488	1.71525	1.56641e-06	-1.63707	down	--	Biological Process: developmental process (GO:0032502);; Biological Process: single-organism cellular process (GO:0044763);; Biological Process: regulation of cellular process (GO:0050794);; Biological Process: response to stimulus (GO:0050896);;	--	Transcription factor TCP3 OS=Arabidopsis thaliana GN=TCP3 PE=2 SV=1	TCP transcription factor 1 [Solanum lycopersicum]
c32430.graph_c0	6.95667	2.86765	8.75963e-05	-1.32674	down	--	Molecular Function: DNA binding (GO:0003677);; Molecular Function: transferase activity (GO:0016740);; Biological Process: penicillin biosynthetic process (GO:0042318);; Molecular Function: protein dimerization activity (GO:0046983);;	--	--	PREDICTED: uncharacterized protein LOC101263293 [Solanum lycopersicum]
c46245.graph_c0	1.28086	0.0481755	0.000227184	-3.631	down	--	--	--	Uncharacterized protein At2g29880 OS=Arabidopsis thaliana GN=At2g29880 PE=2 SV=1	PREDICTED: uncharacterized protein LOC101255640 [Solanum lycopersicum]
c40440.graph_c0	307.35	126.25	3.6637e-11	-1.34778	down	Posttranslational modification, protein turnover, chaperones	Biological Process: protein peptidyl-prolyl isomerization (GO:0000413);; Molecular Function: peptidyl-prolyl cis-trans isomerase activity (GO:0003755);; Biological Process: protein folding (GO:0006457);; Cellular Component: chloroplast stromal thylakoid (GO:0009533);; Cellular Component: chloroplast thylakoid membrane (GO:0009535);; Cellular Component: chloroplast thylakoid lumen (GO:0009543);; B…	K03768|1e-129|rcu:RCOM_1078960|peptidyl-prolyl cis-trans isomerase, putative (EC:5.2.1.8)	Peptidyl-prolyl cis-trans isomerase CYP20-2, chloroplastic OS=Arabidopsis thaliana GN=CYP20-2 PE=1 SV=1	PREDICTED: peptidyl-prolyl cis-trans isomerase CYP20-2, chloroplastic-like [Solanum lycopersicum]
c25343.graph_c0	135.138	68.2107	3.5045e-06	-1.05029	down	--	Molecular Function: protein binding (GO:0005515);; Biological Process: protein targeting to mitochondrion (GO:0006626);; Molecular Function: protein transporter activity (GO:0008565);; Cellular Component: chloroplast inner membrane (GO:0009706);; Biological Process: photosystem II assembly (GO:0010207);; Biological Process: protein import into chloroplast stroma (GO:0045037);;	--	Protein TIC 20-I, chloroplastic OS=Arabidopsis thaliana GN=TIC20-I PE=1 SV=1	PREDICTED: protein TIC 20-I, chloroplastic-like isoform 2 [Solanum lycopersicum]
c36333.graph_c0	6.7184	3.1759	0.00061372	-1.13501	down	--	Biological Process: metabolic process (GO:0008152);; Molecular Function: UDP-glucosyltransferase activity (GO:0035251);; Biological Process: response to chemical (GO:0042221);;	K08237|1e-162|pop:POPTR_731288|hypothetical protein	Hydroquinone glucosyltransferase OS=Rauvolfia serpentina GN=AS PE=1 SV=1	predicted protein [Populus trichocarpa]
c40560.graph_c0	189.552	66.0285	1.44329e-15	-1.58501	down	Translation, ribosomal structure and biogenesis	Cellular Component: plastid large ribosomal subunit (GO:0000311);; Molecular Function: structural constituent of ribosome (GO:0003735);; Biological Process: translation (GO:0006412);; Cellular Component: chloroplast stroma (GO:0009570);; Cellular Component: chloroplast envelope (GO:0009941);; Biological Process: isopentenyl diphosphate biosynthetic process, methylerythritol 4-phosphate pathway (G…	K02939|1e-95|vvi:100251697|hypothetical protein LOC100251697	50S ribosomal protein L9, chloroplastic OS=Ipomoea trifida GN=RPL9 PE=3 SV=1	PREDICTED: 50S ribosomal protein L9, chloroplastic [Vitis vinifera]
c35354.graph_c0	16.1749	7.67495	4.0569e-06	-1.13656	down	--	--	--	Rho GTPase-activating protein 3 OS=Arabidopsis thaliana GN=ROPGAP3 PE=2 SV=1	PREDICTED: rho GTPase-activating protein 4-like [Vitis vinifera]
c33698.graph_c0	9.77923	3.45439	1.69622e-05	-1.54003	down	--	Cellular Component: extracellular region (GO:0005576);; Molecular Function: peptidase activity (GO:0008233);; Molecular Function: zinc ion binding (GO:0008270);;	--	Zinc/RING finger protein 4 OS=Homo sapiens GN=ZNRF4 PE=2 SV=3	zinc finger protein, putative [Ricinus communis]
c25107.graph_c0	103.392	41.2603	1.67375e-11	-1.38866	down	--	Molecular Function: iron ion binding (GO:0005506);; Cellular Component: extracellular region (GO:0005576);; Cellular Component: endosome (GO:0005768);; Cellular Component: vacuolar membrane (GO:0005774);; Cellular Component: Golgi apparatus (GO:0005794);; Cellular Component: trans-Golgi network (GO:0005802);; Biological Process: systemic acquired resistance (GO:0009627);; Biological Process: plan…	K00472|1e-156|ath:AT3G28480|oxidoreductase, 2OG-Fe(II) oxygenase family protein	Prolyl 4-hydroxylase subunit alpha-1 OS=Gallus gallus GN=P4HA1 PE=1 SV=1	type 2 proly 4-hydroxylase [Genlisea aurea]
c14278.graph_c0	1433.79	464.126	0	-1.69182	down	Coenzyme transport and metabolism	Cellular Component: mitochondrion (GO:0005739);; Cellular Component: cytosol (GO:0005829);; Biological Process: cellular response to DNA damage stimulus (GO:0006974);; Molecular Function: zinc ion binding (GO:0008270);; Biological Process: thiamine biosynthetic process (GO:0009228);; Biological Process: response to cold (GO:0009409);; Cellular Component: chloroplast stroma (GO:0009570);; Cellular…	K03146|0.0|vvi:100265774|hypothetical protein LOC100265774	Thiamine thiazole synthase 2, chloroplastic OS=Vitis vinifera GN=THI1-2 PE=2 SV=1	thiamine biosynthetic enzyme [Picrorhiza kurrooa]
c14000.graph_c0	29.4995	15.2231	3.28379e-05	-1.01703	down	Translation, ribosomal structure and biogenesis	Biological Process: rRNA processing (GO:0006364);; Biological Process: translational termination (GO:0006415);; Cellular Component: chloroplast stroma (GO:0009570);; Biological Process: chloroplast relocation (GO:0009902);; Biological Process: leaf morphogenesis (GO:0009965);; Biological Process: thylakoid membrane organization (GO:0010027);; Biological Process: photosystem II assembly (GO:001020…	K02836|0.0|vvi:100265078|hypothetical protein LOC100265078	Peptide chain release factor 2 OS=Synechocystis sp. (strain PCC 6803 / Kazusa) GN=prfB PE=3 SV=2	unnamed protein product [Vitis vinifera]
c26975.graph_c0	2.99202	0.647078	0.000417922	-2.14258	down	--	Cellular Component: plasma membrane (GO:0005886);; Biological Process: phosphate ion transport (GO:0006817);; Cellular Component: integral component of membrane (GO:0016021);; Biological Process: cellular response to phosphate starvation (GO:0016036);;	--	Phosphate transporter PHO1 homolog 10 OS=Arabidopsis thaliana GN=PHO1-H10 PE=2 SV=1	PREDICTED: phosphate transporter PHO1 homolog 10-like [Solanum lycopersicum]
c40571.graph_c0	106.72	38.5652	2.73115e-14	-1.53181	down	--	Biological Process: very long-chain fatty acid metabolic process (GO:0000038);; Biological Process: phosphatidylglycerol biosynthetic process (GO:0006655);; Cellular Component: chloroplast thylakoid membrane (GO:0009535);; Cellular Component: photosystem II reaction center (GO:0009539);; Cellular Component: chloroplast stroma (GO:0009570);; Cellular Component: photosystem II oxygen evolving compl…	K08903|4e-76|vvi:100260011|hypothetical protein LOC100260011	Photosystem II reaction center PSB28 protein, chloroplastic OS=Oryza sativa subsp. japonica GN=PSB28 PE=2 SV=2	PREDICTED: photosystem II reaction center PSB28 protein, chloroplastic-like [Solanum lycopersicum]
c14587.graph_c0	32.7075	14.2384	2.65555e-07	-1.25963	down	--	Cellular Component: chloroplast (GO:0009507);; Molecular Function: isomerase activity (GO:0016853);; Biological Process: cellular protein metabolic process (GO:0044267);; Biological Process: single-organism cellular process (GO:0044763);;	--	--	PREDICTED: uncharacterized protein LOC101268563 [Solanum lycopersicum]
c34469.graph_c1	7.54547	1.82383	5.21781e-10	-2.07463	down	--	Biological Process: lipid metabolic process (GO:0006629);;	--	GDSL esterase/lipase At2g04570 OS=Arabidopsis thaliana GN=At2g04570 PE=2 SV=1	PREDICTED: GDSL esterase/lipase At2g04570-like [Solanum lycopersicum]
c26742.graph_c1	11.773	2.22785	4.46698e-12	-2.41086	down	Amino acid transport and metabolism	Molecular Function: threonine synthase activity (GO:0004795);; Cellular Component: cytosol (GO:0005829);; Biological Process: threonine biosynthetic process (GO:0009088);; Cellular Component: chloroplast stroma (GO:0009570);; Molecular Function: pyridoxal phosphate binding (GO:0030170);;	K01733|1e-155|rcu:RCOM_0654720|threonine synthase, putative (EC:4.2.3.1)	Threonine synthase 1, chloroplastic OS=Arabidopsis thaliana GN=TS1 PE=1 SV=1	PREDICTED: threonine synthase 1, chloroplastic-like [Fragaria vesca subsp. vesca]
c21147.graph_c0	1.36062	0.0619491	0.00323802	-3.3694	down	--	--	--	Putative ribonuclease H protein At1g65750 OS=Arabidopsis thaliana GN=At1g65750 PE=3 SV=1	PREDICTED: putative ribonuclease H protein At1g65750-like [Fragaria vesca subsp. vesca]
c27906.graph_c1	33.2343	8.56194	2.9976e-15	-2.00596	down	--	Cellular Component: mitochondrion (GO:0005739);; Cellular Component: photosynthetic membrane (GO:0034357);;	--	--	PREDICTED: uncharacterized protein LOC101247619 [Solanum lycopersicum]
c38706.graph_c0	81.8607	20.7061	0	-2.04538	down	--	Molecular Function: transferase activity, transferring acyl groups other than amino-acyl groups (GO:0016747);;	--	Pelargonidin 3-O-(6-caffeoylglucoside) 5-O-(6-O-malonylglucoside) 4&apos;&apos;&apos;-malonyltransferase OS=Salvia splendens PE=1 SV=1	predicted protein [Populus trichocarpa]
c40394.graph_c0	395.27	112.523	0	-1.87685	down	Inorganic ion transport and metabolism	Biological Process: MAPK cascade (GO:0000165);; Molecular Function: NADPH dehydrogenase activity (GO:0003959);; Molecular Function: ferredoxin-NADP+ reductase activity (GO:0004324);; Molecular Function: protein binding (GO:0005515);; Biological Process: pentose-phosphate shunt (GO:0006098);; Biological Process: rRNA processing (GO:0006364);; Biological Process: protein targeting to membrane (GO:0…	K02641|0.0|vvi:100241976|hypothetical protein LOC100241976	Ferredoxin--NADP reductase, leaf-type isozyme, chloroplastic OS=Nicotiana tabacum GN=PETH PE=2 SV=1	PREDICTED: ferredoxin--NADP reductase, leaf isozyme, chloroplastic isoform 1 [Vitis vinifera]
c37528.graph_c0	159.863	73.518	3.03692e-08	-1.18509	down	Energy production and conversion	Molecular Function: ubiquinol-cytochrome-c reductase activity (GO:0008121);; Molecular Function: plastoquinol--plastocyanin reductase activity (GO:0009496);; Biological Process: photosynthesis (GO:0015979);; Cellular Component: integral component of membrane (GO:0016021);; Biological Process: electron transport chain (GO:0022900);; Cellular Component: thylakoid membrane (GO:0042651);; Molecular F…	--	Pentatricopeptide repeat-containing protein At1g66345, mitochondrial OS=Arabidopsis thaliana GN=At1g66345 PE=1 SV=1	PREDICTED: pentatricopeptide repeat-containing protein At1g66345, mitochondrial-like [Solanum lycopersicum]
c37420.graph_c0	9.79996	4.25628	1.1507e-05	-1.25855	down	--	Molecular Function: transferase activity, transferring glycosyl groups (GO:0016757);; Biological Process: response to stimulus (GO:0050896);;	--	UDP-glycosyltransferase 87A2 OS=Arabidopsis thaliana GN=UGT87A2 PE=2 SV=1	predicted protein [Populus trichocarpa]
c40078.graph_c0	9.13165	3.38187	3.899e-11	-1.49296	down	--	Biological Process: maltose metabolic process (GO:0000023);; Biological Process: polysaccharide catabolic process (GO:0000272);; Biological Process: pentose-phosphate shunt (GO:0006098);; Biological Process: phosphatidylglycerol biosynthetic process (GO:0006655);; Cellular Component: plastid (GO:0009536);; Biological Process: plant-type cell wall organization (GO:0009664);; Biological Process: ch…	--	Pentatricopeptide repeat-containing protein At4g31850, chloroplastic OS=Arabidopsis thaliana GN=PGR3 PE=1 SV=1	PREDICTED: pentatricopeptide repeat-containing protein At4g31850, chloroplastic [Vitis vinifera]
c37282.graph_c0	14.0145	2.27616	0	-2.66968	down	--	Molecular Function: nucleotide binding (GO:0000166);; Biological Process: response to molecule of fungal origin (GO:0002238);; Molecular Function: protein kinase activity (GO:0004672);; Biological Process: phosphorylation (GO:0016310);;	--	Probable receptor-like serine/threonine-protein kinase At5g57670 OS=Arabidopsis thaliana GN=At5g57670 PE=2 SV=1	PREDICTED: probable receptor-like serine/threonine-protein kinase At5g57670-like [Solanum lycopersicum]
c24683.graph_c0	14.4681	3.18028	6.66134e-16	-2.22575	down	--	Cellular Component: membrane part (GO:0044425);; Cellular Component: cell part (GO:0044464);;	--	CASP-like protein VIT_11s0052g01140 OS=Vitis vinifera GN=VIT_11s0052g01140 PE=2 SV=1	hypothetical protein PRUPE_ppa014614mg, partial [Prunus persica]
c15542.graph_c0	2.09423	0	2.26373e-05	-4.42905	down	--	Cellular Component: membrane (GO:0016020);; Molecular Function: transferase activity, transferring phosphorus-containing groups (GO:0016772);;	--	Probably inactive receptor-like protein kinase At5g41680 OS=Arabidopsis thaliana GN=At5g41680 PE=2 SV=1	PREDICTED: probable inactive receptor kinase At4g23740-like [Vitis vinifera]
c27046.graph_c0	2.98275	1.22225	0.000176673	-1.33319	down	--	--	--	Putative ribonuclease H protein At1g65750 OS=Arabidopsis thaliana GN=At1g65750 PE=3 SV=1	hypothetical protein PRUPE_ppa016553mg [Prunus persica]
c17001.graph_c0	5.62115	1.53559	0.000369153	-1.86018	down	--	--	--	--	predicted protein [Populus trichocarpa]
c18916.graph_c0	7.2054	0.542017	1.55431e-15	-3.58925	down	--	Biological Process: seed coat development (GO:0010214);; Molecular Function: pectinesterase inhibitor activity (GO:0046910);;	--	21 kDa protein OS=Daucus carota PE=2 SV=1	PREDICTED: 21 kDa protein-like [Solanum lycopersicum]
c28600.graph_c0	32.7969	17.0155	4.62493e-05	-1.0092	down	Energy production and conversion	Molecular Function: aldo-keto reductase (NADP) activity (GO:0004033);; Cellular Component: cytosol (GO:0005829);; Cellular Component: plasma membrane (GO:0005886);; Cellular Component: chloroplast envelope (GO:0009941);; Biological Process: response to cadmium ion (GO:0046686);; Biological Process: oxidation-reduction process (GO:0055114);;	--	Probable aldo-keto reductase 2 OS=Oryza sativa subsp. japonica GN=Os04g0338000 PE=2 SV=2	putative aldo/keto reductase 2 [Salvia miltiorrhiza]
c30509.graph_c0	4.46262	0.701908	0.000732255	-2.48783	down	Posttranslational modification, protein turnover, chaperones	Molecular Function: electron carrier activity (GO:0009055);; Molecular Function: protein disulfide oxidoreductase activity (GO:0015035);; Biological Process: cell redox homeostasis (GO:0045454);;	--	Monothiol glutaredoxin-S5 OS=Arabidopsis thaliana GN=GRXS5 PE=3 SV=1	hypothetical protein M569_10600 [Genlisea aurea]
c34314.graph_c0	16.028	0.901815	0	-4.10566	down	--	Molecular Function: catalytic activity (GO:0003824);;	--	Putative protein TPRXL OS=Homo sapiens GN=TPRXL PE=5 SV=2	Dan4p [Saccharomyces cerevisiae S288c]
c38863.graph_c2	48.5288	14.7473	0	-1.77988	down	--	Molecular Function: UDP-glycosyltransferase activity (GO:0008194);; Biological Process: ethylene-activated signaling pathway (GO:0009873);; Molecular Function: transferase activity, transferring hexosyl groups (GO:0016758);;	--	UDP-glycosyltransferase 86A1 OS=Arabidopsis thaliana GN=UGT86A1 PE=2 SV=1	PREDICTED: UDP-glycosyltransferase 86A1-like [Solanum lycopersicum]
c41455.graph_c0	40.5224	16.9413	7.12201e-10	-1.3209	down	--	Cellular Component: chloroplast (GO:0009507);; Biological Process: photosynthesis, light harvesting (GO:0009765);; Biological Process: stomatal complex morphogenesis (GO:0010103);; Biological Process: carotene biosynthetic process (GO:0016120);; Biological Process: xanthophyll biosynthetic process (GO:0016123);; Molecular Function: oxidoreductase activity, acting on paired donors, with incorporat…	K06444|0.0|vvi:100259482|hypothetical protein LOC100259482	Lycopene epsilon cyclase, chloroplastic OS=Solanum lycopersicum GN=CRTL-E-1 PE=2 SV=1	Lycopene epsilon cyclase [Gentiana lutea]
c38136.graph_c0	6.19853	2.76316	9.39183e-05	-1.21927	down	Carbohydrate transport and metabolism	Molecular Function: aldose 1-epimerase activity (GO:0004034);; Biological Process: galactose metabolic process (GO:0006012);; Molecular Function: carbohydrate binding (GO:0030246);;	K01792|2e-90|rcu:RCOM_1690740|aldose 1-epimerase, putative	Putative glucose-6-phosphate 1-epimerase OS=Cenchrus ciliaris PE=2 SV=1	Galactose mutarotase-like superfamily protein [Theobroma cacao]
c36147.graph_c0	15.2228	7.47032	0.000213151	-1.08504	down	--	Cellular Component: chloroplast stroma (GO:0009570);;	--	--	predicted protein [Populus trichocarpa]
c27583.graph_c0	29.1571	12.8312	2.97298e-08	-1.24627	down	Posttranslational modification, protein turnover, chaperones	Molecular Function: transporter activity (GO:0005215);; Molecular Function: protein binding (GO:0005515);; Biological Process: rRNA processing (GO:0006364);; Biological Process: tryptophan catabolic process (GO:0006569);; Biological Process: transport (GO:0006810);; Cellular Component: chloroplast stroma (GO:0009570);; Biological Process: indoleacetic acid biosynthetic process (GO:0009684);; Biol…	K09015|0.0|vvi:100260803|hypothetical protein LOC100260803	Protein ABCI7, chloroplastic OS=Arabidopsis thaliana GN=ABCI7 PE=1 SV=1	PREDICTED: protein ABCI7, chloroplastic-like [Solanum lycopersicum]
c32879.graph_c1	11.0667	1.94715	1.19713e-06	-2.44436	down	--	--	--	--	Keratin-associated protein 5-4 [Theobroma cacao]
c27505.graph_c0	39.796	13.407	4.09561e-13	-1.6287	down	Posttranslational modification, protein turnover, chaperones	Biological Process: pentose-phosphate shunt (GO:0006098);; Cellular Component: chloroplast thylakoid membrane (GO:0009535);; Biological Process: megagametogenesis (GO:0009561);; Biological Process: chloroplast relocation (GO:0009902);; Biological Process: thylakoid membrane organization (GO:0010027);; Biological Process: PSII associated light-harvesting complex II catabolic process (GO:0010304);;…	--	--	predicted protein [Populus trichocarpa]
c32880.graph_c0	3.0312	0.681093	7.1456e-07	-2.14496	down	--	Biological Process: cellular process (GO:0009987);;	--	Coleoptile phototropism protein 1 OS=Oryza sativa subsp. japonica GN=CPT1 PE=2 SV=1	Phototropic-responsive NPH3 family protein [Theobroma cacao]
c40834.graph_c0	89.942	23.3018	0	-2.0096	down	Coenzyme transport and metabolism	Biological Process: pentose-phosphate shunt (GO:0006098);; Biological Process: rRNA processing (GO:0006364);; Biological Process: tetrahydrobiopterin biosynthetic process (GO:0006729);; Molecular Function: 4-alpha-hydroxytetrahydrobiopterin dehydratase activity (GO:0008124);; Biological Process: aromatic amino acid family biosynthetic process (GO:0009073);; Cellular Component: chloroplast (GO:000…	--	Putative pterin-4-alpha-carbinolamine dehydratase OS=Microcystis aeruginosa (strain NIES-843) GN=MAE_39970 PE=3 SV=1	PREDICTED: putative pterin-4-alpha-carbinolamine dehydratase-like [Solanum lycopersicum]
c14553.graph_c0	40.4181	15.0559	1.28897e-13	-1.48832	down	Inorganic ion transport and metabolism	Molecular Function: nucleotide binding (GO:0000166);; Cellular Component: chloroplast envelope (GO:0009941);; Molecular Function: potassium:hydrogen antiporter activity (GO:0015386);; Biological Process: proton transport (GO:0015992);; Cellular Component: integral component of membrane (GO:0016021);; Biological Process: potassium ion transmembrane transport (GO:0071805);;	--	K(+) efflux antiporter 2, chloroplastic OS=Arabidopsis thaliana GN=KEA2 PE=1 SV=2	hypothetical protein PRUPE_ppa000383mg [Prunus persica]
c31146.graph_c0	22.8736	5.71888	2.22045e-16	-2.0498	down	--	Molecular Function: nucleotide binding (GO:0000166);; Molecular Function: 3-beta-hydroxy-delta5-steroid dehydrogenase activity (GO:0003854);; Cellular Component: cytosol (GO:0005829);; Biological Process: steroid metabolic process (GO:0008202);; Biological Process: xylem and phloem pattern formation (GO:0010051);; Biological Process: cellular metabolic process (GO:0044237);; Molecular Function: d…	--	3-oxo-Delta(4,5)-steroid 5-beta-reductase OS=Digitalis lanata PE=1 SV=1	PREDICTED: uncharacterized protein C757.02c-like [Vitis vinifera]
c39772.graph_c0	22.1487	11.3912	1.52364e-05	-1.02252	down	Carbohydrate transport and metabolism	Molecular Function: beta-galactosidase activity (GO:0004565);; Cellular Component: cell wall (GO:0005618);; Biological Process: carbohydrate metabolic process (GO:0005975);; Biological Process: plant-type cell wall modification (GO:0009827);; Molecular Function: carbohydrate binding (GO:0030246);; Molecular Function: cation binding (GO:0043169);; Cellular Component: apoplast (GO:0048046);; Biolog…	--	Beta-galactosidase 6 OS=Arabidopsis thaliana GN=BGAL6 PE=2 SV=1	PREDICTED: beta-galactosidase 16-like [Solanum lycopersicum]
c36995.graph_c0	17.0401	2.16622	0	-2.99925	down	Function unknown	Cellular Component: nucleus (GO:0005634);; Biological Process: aromatic amino acid family biosynthetic process (GO:0009073);; Cellular Component: chloroplast thylakoid membrane (GO:0009535);; Cellular Component: chloroplast stroma (GO:0009570);; Biological Process: NAD(P)H dehydrogenase complex assembly (GO:0010275);; Biological Process: iron-sulfur cluster assembly (GO:0016226);;	--	--	PREDICTED: uncharacterized protein LOC100255118 [Vitis vinifera]
c33906.graph_c1	48.2285	21.1597	3.30403e-09	-1.25215	down	--	Biological Process: aromatic amino acid family biosynthetic process (GO:0009073);; Cellular Component: chloroplast (GO:0009507);; Biological Process: embryo development ending in seed dormancy (GO:0009793);; Biological Process: stomatal complex morphogenesis (GO:0010103);; Biological Process: iron-sulfur cluster assembly (GO:0016226);; Biological Process: protein targeting to chloroplast (GO:0045…	--	Pentatricopeptide repeat-containing protein At5g46580, chloroplastic OS=Arabidopsis thaliana GN=At5g46580 PE=2 SV=1	PREDICTED: pentatricopeptide repeat-containing protein At5g46580, chloroplastic [Vitis vinifera]
c33508.graph_c0	10.6239	2.46043	5.75221e-10	-2.13132	down	Cell wall/membrane/envelope biogenesis	Cellular Component: Golgi apparatus (GO:0005794);; Cellular Component: plant-type cell wall (GO:0009505);; Cellular Component: plasmodesma (GO:0009506);; Cellular Component: anchored component of plasma membrane (GO:0046658);;	--	Fasciclin-like arabinogalactan protein 9 OS=Arabidopsis thaliana GN=FLA9 PE=1 SV=1	unknown [Medicago truncatula]
c15575.graph_c0	31.7487	15.4095	2.29532e-06	-1.10539	down	--	Molecular Function: nucleotide binding (GO:0000166);; Cellular Component: mitochondrion (GO:0005739);; Biological Process: pentose-phosphate shunt (GO:0006098);; Biological Process: rRNA processing (GO:0006364);; Biological Process: unsaturated fatty acid biosynthetic process (GO:0006636);; Biological Process: aromatic amino acid family biosynthetic process (GO:0009073);; Cellular Component: chlo…	--	Divinyl chlorophyllide a 8-vinyl-reductase, chloroplastic OS=Cucumis sativus GN=DVR PE=1 SV=1	PREDICTED: uncharacterized protein LOC101247061 [Solanum lycopersicum]
c15071.graph_c0	2.44803	0.407254	4.03393e-06	-2.49985	down	Carbohydrate transport and metabolism	--	--	Adipocyte plasma membrane-associated protein OS=Danio rerio GN=apmap PE=2 SV=1	hypothetical protein PRUPE_ppa022087mg [Prunus persica]
c33348.graph_c0	19.3174	8.89728	2.303e-05	-1.17615	down	Function unknown	Cellular Component: nucleus (GO:0005634);; Cellular Component: chloroplast (GO:0009507);;	--	--	PREDICTED: uncharacterized protein LOC101297958 isoform 2 [Fragaria vesca subsp. vesca]
c14659.graph_c0	10.4174	4.77336	0.000100711	-1.18119	down	--	Cellular Component: membrane (GO:0016020);;	--	WAT1-related protein At3g28050 OS=Arabidopsis thaliana GN=At3g28050 PE=2 SV=1	PREDICTED: auxin-induced protein 5NG4-like [Solanum lycopersicum]
c19585.graph_c0	159.42	64.3163	1.32667e-11	-1.37362	down	Amino acid transport and metabolism	Molecular Function: aminomethyltransferase activity (GO:0004047);; Cellular Component: mitochondrion (GO:0005739);; Biological Process: glycine catabolic process (GO:0006546);; Biological Process: pattern specification process (GO:0007389);; Biological Process: regulation of cell size (GO:0008361);; Molecular Function: transaminase activity (GO:0008483);; Cellular Component: chloroplast thylakoid…	K00605|0.0|vvi:100250401|hypothetical protein LOC100250401	Aminomethyltransferase, mitochondrial OS=Flaveria pringlei GN=GDCST PE=2 SV=1	RecName: Full=Aminomethyltransferase, mitochondrial; AltName: Full=Glycine cleavage system T protein; Short=GCVT; Flags: Precursor
c42820.graph_c0	3.56911	0.742571	1.46866e-07	-2.25063	down	--	Cellular Component: extracellular region (GO:0005576);; Cellular Component: membrane (GO:0016020);;	--	WAT1-related protein At5g64700 OS=Arabidopsis thaliana GN=At5g64700 PE=2 SV=1	hypothetical protein M569_11017, partial [Genlisea aurea]
c14274.graph_c1	421.94	89.0951	0	-2.30771	down	Coenzyme transport and metabolism	Cellular Component: cytosol (GO:0005829);; Biological Process: response to stress (GO:0006950);; Biological Process: thiamine biosynthetic process (GO:0009228);; Cellular Component: chloroplast stroma (GO:0009570);; Molecular Function: metal ion binding (GO:0046872);; Biological Process: thiazole biosynthetic process (GO:0052837);;	K03146|4e-52|pop:POPTR_568201|thiazole synthase	Thiamine thiazole synthase 2, chloroplastic OS=Vitis vinifera GN=THI1-2 PE=2 SV=1	unknown [Populus trichocarpa]
c14452.graph_c0	28.9387	9.58447	7.1725e-08	-1.63923	down	Cytoskeleton	--	--	Actin (Fragment) OS=Dictyocaulus viviparus PE=3 SV=1	actin-like protein [Phytophthora infestans T30-4]
c34838.graph_c0	22.6427	3.78693	0	-2.61669	down	--	Cellular Component: chloroplast thylakoid membrane (GO:0009535);;	--	--	Chaperone DnaJ-domain superfamily protein [Theobroma cacao]
c35017.graph_c0	23.4319	3.33943	0	-2.85872	down	Carbohydrate transport and metabolism	Molecular Function: glucan exo-1,3-beta-glucosidase activity (GO:0004338);; Molecular Function: beta-galactosidase activity (GO:0004565);; Molecular Function: beta-D-fucosidase activity (GO:0033907);; Cellular Component: cell part (GO:0044464);; Molecular Function: beta-L-arabinosidase activity (GO:0047701);; Molecular Function: beta-gentiobiose beta-glucosidase activity (GO:0080083);;	--	Beta-glucosidase 12 OS=Oryza sativa subsp. japonica GN=BGLU12 PE=2 SV=2	beta-glucosidase [Olea europaea subsp. europaea]
c36088.graph_c0	247.173	107.85	1.36849e-09	-1.26068	down	Translation, ribosomal structure and biogenesis	Cellular Component: plastid large ribosomal subunit (GO:0000311);; Molecular Function: structural constituent of ribosome (GO:0003735);; Biological Process: DNA-templated transcription, elongation (GO:0006354);; Biological Process: translation (GO:0006412);; Cellular Component: chloroplast stroma (GO:0009570);; Cellular Component: chloroplast envelope (GO:0009941);;	K02876|1e-128|vvi:100268043|hypothetical protein LOC100268043	50S ribosomal protein L15, chloroplastic (Fragment) OS=Pisum sativum GN=RPL15 PE=1 SV=1	PREDICTED: 50S ribosomal protein L15, chloroplastic-like [Solanum lycopersicum]
c32465.graph_c0	25.8669	12.1641	1.17517e-06	-1.15026	down	Function unknown	Cellular Component: chloroplast (GO:0009507);; Cellular Component: integral component of membrane (GO:0016021);; Biological Process: cellular response to water deprivation (GO:0042631);;	--	GDT1-like protein 1, chloroplastic OS=Arabidopsis thaliana GN=At1g64150 PE=2 SV=2	PREDICTED: GDT1-like protein 1, chloroplastic-like, partial [Cucumis sativus]
c31565.graph_c0	492.061	206.601	1.38447e-10	-1.31632	down	--	Cellular Component: chloroplast thylakoid membrane (GO:0009535);; Cellular Component: chloroplast envelope (GO:0009941);; Cellular Component: plastoglobule (GO:0010287);;	--	Uncharacterized protein At4g01150, chloroplastic OS=Arabidopsis thaliana GN=At4g01150 PE=1 SV=1	hypothetical protein PRUPE_ppa011635mg [Prunus persica]
c38590.graph_c0	4.20872	1.93662	0.00143891	-1.1701	down	--	Molecular Function: protein kinase activity (GO:0004672);; Molecular Function: binding (GO:0005488);;	--	Probable receptor-like protein kinase At1g67000 OS=Arabidopsis thaliana GN=At1g67000 PE=2 SV=2	PREDICTED: probable receptor-like protein kinase At5g39020-like [Vitis vinifera]
c40207.graph_c0	52.3525	23.2018	3.33481e-09	-1.23832	down	Energy production and conversion	Molecular Function: DNA binding (GO:0003677);; Molecular Function: DNA-directed RNA polymerase activity (GO:0003899);; Molecular Function: ATP binding (GO:0005524);; Cellular Component: mitochondrion (GO:0005739);; Cellular Component: plasma membrane (GO:0005886);; Biological Process: transcription, DNA-templated (GO:0006351);; Cellular Component: chloroplast thylakoid membrane (GO:0009535);; Bio…	K02111|0.0|vvi:4025114|atpA	ATP synthase subunit alpha, chloroplastic OS=Eucalyptus globulus subsp. globulus GN=atpA PE=3 SV=1	RNA polymerase beta&apos;&apos; subunit protein [Antirrhinum majus]
c31895.graph_c0	58.7657	20.5421	1.05693e-13	-1.57777	down	Function unknown	Molecular Function: protein binding (GO:0005515);; Cellular Component: extracellular region (GO:0005576);; Biological Process: rRNA processing (GO:0006364);; Biological Process: unsaturated fatty acid biosynthetic process (GO:0006636);; Cellular Component: chloroplast thylakoid membrane (GO:0009535);; Cellular Component: chloroplast thylakoid lumen (GO:0009543);; Cellular Component: chloroplast s…	--	Thylakoid lumenal 17.4 kDa protein, chloroplastic OS=Arabidopsis thaliana GN=At5g53490 PE=1 SV=2	PREDICTED: thylakoid lumenal 17.4 kDa protein, chloroplastic-like isoform 1 [Solanum lycopersicum]
c17333.graph_c0	6.27635	0.748896	2.19294e-08	-2.9338	down	--	--	--	--	conserved hypothetical protein [Ricinus communis]
c28632.graph_c0	18.3755	3.34227	2.22045e-16	-2.48494	down	--	Biological Process: transport (GO:0006810);;	--	Non-specific lipid-transfer protein 2 OS=Nicotiana tabacum PE=3 SV=1	lipid transfer protein 2 [Salvia miltiorrhiza]
c13588.graph_c0	5.90514	2.38391	0.00722876	-1.33993	down	--	--	--	--	PREDICTED: uncharacterized protein LOC100262963 [Vitis vinifera]
c30134.graph_c0	17.6702	3.24658	0	-2.47599	down	--	--	--	--	PREDICTED: uncharacterized protein LOC101244747 [Solanum lycopersicum]
c28929.graph_c0	3.10564	0.710251	1.66995e-07	-2.12909	down	Carbohydrate transport and metabolism	Molecular Function: beta-galactosidase activity (GO:0004565);; Biological Process: carbohydrate metabolic process (GO:0005975);; Cellular Component: chloroplast (GO:0009507);; Molecular Function: beta-D-fucosidase activity (GO:0033907);; Molecular Function: glucan endo-1,3-beta-D-glucosidase activity (GO:0042973);; Molecular Function: metal ion binding (GO:0046872);; Cellular Component: apoplast …	K01188|0.0|rcu:RCOM_1621030|beta-glucosidase, putative (EC:3.2.1.21)	Beta-glucosidase 40 OS=Arabidopsis thaliana GN=BGLU40 PE=2 SV=1	PREDICTED: beta-glucosidase 40-like [Solanum lycopersicum]
c32102.graph_c0	39.815	16.2006	1.07288e-09	-1.35866	down	--	Cellular Component: chloroplast (GO:0009507);; Cellular Component: plastid chromosome (GO:0009508);;	--	--	PREDICTED: uncharacterized protein LOC101262600 [Solanum lycopersicum]
c14153.graph_c0	67.7083	30.1393	1.52562e-08	-1.23072	down	General function prediction only	Molecular Function: nucleotide binding (GO:0000166);; Molecular Function: RNA binding (GO:0003723);; Biological Process: cysteine biosynthetic process (GO:0019344);; Cellular Component: intracellular part (GO:0044424);;	--	29 kDa ribonucleoprotein A, chloroplastic OS=Nicotiana sylvestris PE=2 SV=1	PREDICTED: 29 kDa ribonucleoprotein, chloroplastic-like [Solanum lycopersicum]
c15246.graph_c0	2.59024	0.101852	0	-4.40215	down	--	Molecular Function: protein serine/threonine kinase activity (GO:0004674);; Molecular Function: ATP binding (GO:0005524);; Biological Process: protein phosphorylation (GO:0006468);; Biological Process: recognition of pollen (GO:0048544);;	--	Putative receptor protein kinase ZmPK1 OS=Zea mays GN=PK1 PE=2 SV=2	PREDICTED: putative receptor protein kinase ZmPK1-like [Vitis vinifera]
c40836.graph_c0	74.6573	30.7605	1.10646e-10	-1.34261	down	--	Biological Process: maltose metabolic process (GO:0000023);; Cellular Component: mitochondrion (GO:0005739);; Biological Process: pentose-phosphate shunt (GO:0006098);; Biological Process: rRNA processing (GO:0006364);; Biological Process: unsaturated fatty acid biosynthetic process (GO:0006636);; Cellular Component: chloroplast thylakoid membrane (GO:0009535);; Biological Process: response to bl…	--	Calcium sensing receptor, chloroplastic OS=Arabidopsis thaliana GN=CAS PE=1 SV=1	extracellular calcium sensing receptor [Schima superba]
c18062.graph_c0	27.0942	13.7767	6.62639e-06	-1.03931	down	Posttranslational modification, protein turnover, chaperones	Molecular Function: ATP-dependent peptidase activity (GO:0004176);; Molecular Function: metalloendopeptidase activity (GO:0004222);; Molecular Function: ATP binding (GO:0005524);; Cellular Component: mitochondrion (GO:0005739);; Cellular Component: plasma membrane (GO:0005886);; Biological Process: ATP catabolic process (GO:0006200);; Biological Process: proteolysis (GO:0006508);; Molecular Funct…	K03798|0.0|vvi:100244978|hypothetical protein LOC100244978	ATP-dependent zinc metalloprotease FTSH 12, chloroplastic OS=Arabidopsis thaliana GN=FTSH12 PE=2 SV=2	PREDICTED: ATP-dependent zinc metalloprotease FTSH 12, chloroplastic-like [Solanum lycopersicum]
c41093.graph_c0	35.2772	16.079	0.000228199	-1.18708	down	Cytoskeleton	Molecular Function: ATP binding (GO:0005524);; Cellular Component: cytoplasm (GO:0005737);; Cellular Component: cytoskeleton (GO:0005856);;	K10355|6e-85|ath:AT3G46520|ACT12	Actin-93 (Fragment) OS=Nicotiana tabacum PE=3 SV=1	actin [Asarina barclaiana]
c19412.graph_c0	23.31	7.04168	2.77556e-15	-1.78463	down	Coenzyme transport and metabolism	Molecular Function: dimethylallyltranstransferase activity (GO:0004161);; Molecular Function: nucleocytoplasmic transporter activity (GO:0005487);; Molecular Function: protein binding (GO:0005515);; Cellular Component: nuclear envelope (GO:0005635);; Cellular Component: mitochondrion (GO:0005739);; Cellular Component: chloroplast thylakoid membrane (GO:0009535);; Biological Process: negative regu…	K12501|0.0|pop:POPTR_819322|hypothetical protein	Homogentisate phytyltransferase 2, chloroplastic OS=Arabidopsis thaliana GN=HPT2 PE=2 SV=1	PREDICTED: homogentisate phytyltransferase 2, chloroplastic-like [Solanum lycopersicum]
c25964.graph_c0	17.5745	3.81351	0	-2.24853	down	--	Cellular Component: cytoplasmic membrane-bounded vesicle (GO:0016023);;	--	Glycine-rich cell wall structural protein OS=Arabidopsis thaliana GN=At3g17050 PE=4 SV=2	hypothetical protein PDIG_81210 [Penicillium digitatum PHI26]
c44428.graph_c0	2.66258	0	0	-6.00924	down	Defense mechanisms	Cellular Component: plasma membrane (GO:0005886);; Biological Process: drug transmembrane transport (GO:0006855);; Biological Process: fruit ripening (GO:0009835);; Molecular Function: drug transmembrane transporter activity (GO:0015238);; Molecular Function: antiporter activity (GO:0015297);;	--	Protein TRANSPARENT TESTA 12 OS=Arabidopsis thaliana GN=TT12 PE=2 SV=1	MATE efflux family protein [Theobroma cacao]
c36433.graph_c0	1.97735	0.152049	7.02724e-08	-3.38055	down	--	--	--	--	PREDICTED: uncharacterized protein LOC100245904 [Vitis vinifera]
c38559.graph_c0	10.4875	5.22973	7.33872e-05	-1.06409	down	--	Cellular Component: mitochondrion (GO:0005739);; Cellular Component: plastid (GO:0009536);; Biological Process: embryo development ending in seed dormancy (GO:0009793);;	--	Pentatricopeptide repeat-containing protein At3g29290 OS=Arabidopsis thaliana GN=EMB2076 PE=2 SV=1	PREDICTED: pentatricopeptide repeat-containing protein At3g29290-like [Vitis vinifera]
c27983.graph_c0	77.7519	29.0291	7.84928e-14	-1.4855	down	Translation, ribosomal structure and biogenesis	Cellular Component: plastid small ribosomal subunit (GO:0000312);; Molecular Function: structural constituent of ribosome (GO:0003735);; Cellular Component: mitochondrial small ribosomal subunit (GO:0005763);; Biological Process: translation (GO:0006412);; Cellular Component: chloroplast (GO:0009507);; Molecular Function: rRNA binding (GO:0019843);;	--	30S ribosomal protein S7, chloroplastic OS=Acorus calamus GN=rps7-A PE=3 SV=1	uncharacterized protein LOC100306140 [Glycine max]
c39951.graph_c0	4.35968	1.49557	1.2612e-05	-1.5802	down	--	Molecular Function: hydrolase activity (GO:0016787);;	--	Subtilisin-like protease OS=Arabidopsis thaliana GN=ARA12 PE=1 SV=1	predicted protein [Hordeum vulgare subsp. vulgare]
c37188.graph_c0	3.85779	0.235572	1.44329e-15	-3.82357	down	--	Biological Process: cellular process (GO:0009987);;	--	Root phototropism protein 3 OS=Arabidopsis thaliana GN=RPT3 PE=1 SV=2	Phototropic-responsive NPH3 family protein [Theobroma cacao]
c40061.graph_c0	29.0697	12.3002	9.6321e-10	-1.30383	down	--	Biological Process: drug transmembrane transport (GO:0006855);; Molecular Function: drug transmembrane transporter activity (GO:0015238);; Molecular Function: antiporter activity (GO:0015297);; Cellular Component: membrane (GO:0016020);;	--	Proteinaceous RNase P 1, chloroplastic/mitochondrial OS=Arabidopsis thaliana GN=PRORP1 PE=1 SV=1	PREDICTED: proteinaceous RNase P 1, chloroplastic/mitochondrial-like [Solanum lycopersicum]
c30389.graph_c0	68.2549	17.2879	0	-2.04334	down	Cell wall/membrane/envelope biogenesis	Biological Process: pentose-phosphate shunt (GO:0006098);; Cellular Component: chloroplast thylakoid membrane (GO:0009535);; Biological Process: photosynthetic electron transport in photosystem I (GO:0009773);; Biological Process: photosystem II assembly (GO:0010207);; Cellular Component: NAD(P)H dehydrogenase complex (plastoquinone) (GO:0010598);; Biological Process: carotenoid biosynthetic proc…	--	--	PREDICTED: uncharacterized protein LOC101247416 [Solanum lycopersicum]
c42632.graph_c0	5.26448	1.5921	4.28582e-07	-1.75837	down	General function prediction only	Biological Process: protein targeting to membrane (GO:0006612);; Cellular Component: chloroplast (GO:0009507);; Biological Process: positive regulation of flavonoid biosynthetic process (GO:0009963);; Biological Process: regulation of plant-type hypersensitive response (GO:0010363);;	--	--	PREDICTED: uncharacterized protein LOC101251260 [Solanum lycopersicum]
c25726.graph_c0	472.586	206.521	1.47868e-09	-1.25851	down	--	Cellular Component: nucleus (GO:0005634);; Biological Process: response to sucrose (GO:0009744);; Biological Process: response to glucose (GO:0009749);; Biological Process: response to fructose (GO:0009750);;	--	Auxin-repressed 12.5 kDa protein OS=Fragaria ananassa PE=2 SV=1	auxin-repressed protein-like protein ARP1 [Manihot esculenta]
c41746.graph_c0	28.5013	10.7508	1.94651e-10	-1.4661	down	--	Biological Process: lipid metabolic process (GO:0006629);;	--	GDSL esterase/lipase At4g26790 OS=Arabidopsis thaliana GN=At4g26790 PE=2 SV=1	hypothetical protein M569_07715, partial [Genlisea aurea]
c13612.graph_c0	6.87949	1.10208	1.56785e-06	-2.55317	down	--	Biological Process: fatty acid catabolic process (GO:0009062);; Biological Process: response to gibberellin (GO:0009739);;	--	--	putative DUF584 protein [Linum usitatissimum]
c34315.graph_c0	27.1324	13.2358	1.18917e-05	-1.09676	down	--	Biological Process: defense response to oomycetes (GO:0002229);; Cellular Component: mitochondrion (GO:0005739);; Cellular Component: chloroplast (GO:0009507);; Biological Process: stomatal complex morphogenesis (GO:0010103);; Biological Process: positive regulation of hydrogen peroxide biosynthetic process (GO:0010729);; Cellular Component: membrane (GO:0016020);; Biological Process: photosynthe…	--	--	hypothetical protein PRUPE_ppa015205mg [Prunus persica]
c31637.graph_c0	6.33308	1.25413	6.53921e-14	-2.36007	down	--	--	--	--	predicted protein [Populus trichocarpa]
c24351.graph_c0	31.991	13.2753	2.5884e-09	-1.33046	down	--	Cellular Component: chloroplast thylakoid membrane (GO:0009535);; Cellular Component: chloroplast envelope (GO:0009941);; Biological Process: stomatal complex morphogenesis (GO:0010103);; Biological Process: mRNA modification (GO:0016556);; Biological Process: photosynthesis, light reaction (GO:0019684);;	--	Protein TIC 62, chloroplastic OS=Arabidopsis thaliana GN=TIC62 PE=1 SV=1	PREDICTED: protein TIC 62, chloroplastic isoform 1 [Vitis vinifera]
c41171.graph_c0	49.3345	19.2578	1.07098e-11	-1.41995	down	Intracellular trafficking, secretion, and vesicular transport	Molecular Function: protein binding (GO:0005515);; Biological Process: DNA-templated transcription, elongation (GO:0006354);; Biological Process: protein secretion (GO:0009306);; Cellular Component: chloroplast thylakoid membrane (GO:0009535);; Biological Process: thylakoid membrane organization (GO:0010027);; Molecular Function: P-P-bond-hydrolysis-driven protein transmembrane transporter activi…	K10956|0.0|rcu:RCOM_0348860|protein translocase secy subunit, putative	Preprotein translocase subunit SECY, chloroplastic OS=Spinacia oleracea GN=SECY PE=2 SV=1	PREDICTED: preprotein translocase subunit SCY1, chloroplastic-like [Solanum lycopersicum]
c41232.graph_c0	59.3262	23.8032	4.17222e-11	-1.38051	down	Translation, ribosomal structure and biogenesis	Molecular Function: aminopeptidase activity (GO:0004177);; Cellular Component: mitochondrion (GO:0005739);; Biological Process: proteolysis (GO:0006508);; Molecular Function: metalloexopeptidase activity (GO:0008235);; Cellular Component: chloroplast (GO:0009507);; Biological Process: methylglyoxal catabolic process to D-lactate (GO:0019243);; Biological Process: N-terminal protein amino acid mod…	K01265|0.0|vvi:100262904|hypothetical protein LOC100262904	Methionine aminopeptidase 1B, chloroplastic OS=Arabidopsis thaliana GN=MAP1B PE=2 SV=2	PREDICTED: methionine aminopeptidase 1B, chloroplastic-like [Solanum lycopersicum]
c14431.graph_c0	34.835	7.19346	0	-2.3344	down	--	Biological Process: sulfur amino acid metabolic process (GO:0000096);; Molecular Function: protein binding (GO:0005515);; Biological Process: pentose-phosphate shunt (GO:0006098);; Biological Process: rRNA processing (GO:0006364);; Biological Process: glycine catabolic process (GO:0006546);; Biological Process: unsaturated fatty acid biosynthetic process (GO:0006636);; Biological Process: phospha…	K09839|0.0|vvi:100257865|hypothetical protein LOC100257865	Violaxanthin de-epoxidase, chloroplastic OS=Nicotiana tabacum GN=VDE1 PE=2 SV=1	violaxanthin de-epoxidase [Coffea arabica]
c40531.graph_c0	233.249	79.302	1.11022e-16	-1.62067	down	Amino acid transport and metabolism	Molecular Function: glycine hydroxymethyltransferase activity (GO:0004372);; Molecular Function: protein binding (GO:0005515);; Cellular Component: nucleus (GO:0005634);; Cellular Component: mitochondrial matrix (GO:0005759);; Cellular Component: plasma membrane (GO:0005886);; Biological Process: L-serine metabolic process (GO:0006563);; Biological Process: circadian rhythm (GO:0007623);; Molecul…	K00600|0.0|rcu:RCOM_0230740|serine hydroxymethyltransferase, putative (EC:2.1.2.1)	Serine hydroxymethyltransferase, mitochondrial OS=Solanum tuberosum PE=2 SV=1	RecName: Full=Serine hydroxymethyltransferase, mitochondrial; Short=SHMT; AltName: Full=Glycine hydroxymethyltransferase; AltName: Full=Serine methylase; Flags: Precursor
c29679.graph_c1	22.0881	11.1992	0.000255293	-1.03938	down	--	Cellular Component: nucleus (GO:0005634);; Cellular Component: vacuole (GO:0005773);; Biological Process: photoperiodism, flowering (GO:0048573);;	K11344|1e-41|vvi:100259638|hypothetical protein LOC100259638	Chromatin modification-related protein MEAF6 OS=Gallus gallus GN=MEAF6 PE=2 SV=1	PREDICTED: chromatin modification-related protein MEAF6-like [Solanum lycopersicum]
c39867.graph_c0	16.867	5.82558	3.91076e-12	-1.5923	down	--	Molecular Function: DNA binding (GO:0003677);;	--	Heat stress transcription factor A-3 OS=Arabidopsis thaliana GN=HSFA3 PE=2 SV=2	unnamed protein product [Vitis vinifera]
c41891.graph_c0	18.306	7.91801	0.000331893	-1.25806	down	--	Biological Process: maltose metabolic process (GO:0000023);; Biological Process: pentose-phosphate shunt (GO:0006098);; Cellular Component: cytoplasmic membrane-bounded vesicle (GO:0016023);; Biological Process: starch biosynthetic process (GO:0019252);;	--	--	PREDICTED: uncharacterized protein LOC101211279 [Cucumis sativus]
c19911.graph_c2	14.4256	5.9516	0.000241414	-1.32315	down	--	Biological Process: polysaccharide biosynthetic process (GO:0000271);; Biological Process: amino acid transmembrane transport (GO:0003333);; Cellular Component: plasma membrane (GO:0005886);; Biological Process: acetyl-CoA metabolic process (GO:0006084);; Biological Process: auxin-activated signaling pathway (GO:0009734);; Biological Process: multidimensional cell growth (GO:0009825);; Biological…	K13946|1e-144|rcu:RCOM_1031400|amino acid transporter, putative	Auxin transporter-like protein 3 OS=Medicago truncatula GN=LAX3 PE=2 SV=1	amino acid transporter, putative [Ricinus communis]
c37584.graph_c2	24.5349	8.83772	3.60437e-09	-1.52773	down	--	Molecular Function: DNA binding (GO:0003677);; Molecular Function: sequence-specific DNA binding transcription factor activity (GO:0003700);; Cellular Component: nucleus (GO:0005634);; Biological Process: regulation of transcription, DNA-templated (GO:0006355);; Molecular Function: protein dimerization activity (GO:0046983);;	--	Agamous-like MADS-box protein AGL27 OS=Arabidopsis thaliana GN=AGL27 PE=1 SV=1	RIN-like MADS-box protein [Torenia fournieri]
c40479.graph_c0	237.131	100.771	2.83546e-10	-1.29891	down	Coenzyme transport and metabolism	Molecular Function: ATP binding (GO:0005524);; Cellular Component: cell wall (GO:0005618);; Biological Process: ATP catabolic process (GO:0006200);; Cellular Component: chloroplast stroma (GO:0009570);; Biological Process: photosynthesis (GO:0015979);; Biological Process: chlorophyll biosynthetic process (GO:0015995);; Molecular Function: magnesium chelatase activity (GO:0016851);; Molecular Func…	K03405|0.0|vvi:100267459|hypothetical protein LOC100267459	Magnesium-chelatase subunit ChlI, chloroplastic OS=Nicotiana tabacum GN=CHLI PE=2 SV=1	PREDICTED: magnesium-chelatase subunit ChlI, chloroplastic-like isoform 1 [Solanum lycopersicum]
c25484.graph_c0	34.4461	10.3109	1.44329e-15	-1.79789	down	--	Cellular Component: plasma membrane (GO:0005886);; Cellular Component: chloroplast thylakoid membrane (GO:0009535);; Biological Process: regulation of proton transport (GO:0010155);; Biological Process: NADH dehydrogenase complex (plastoquinone) assembly (GO:0010258);; Cellular Component: NAD(P)H dehydrogenase complex (plastoquinone) (GO:0010598);; Molecular Function: oxidoreductase activity, act…	--	NAD(P)H-quinone oxidoreductase subunit O OS=Gloeobacter violaceus (strain PCC 7421) GN=ndhO PE=3 SV=1	hypothetical protein PRUPE_ppa012640mg [Prunus persica]
c14631.graph_c0	79.5803	28.4829	6.72007e-12	-1.54203	down	--	Cellular Component: plant-type vacuole (GO:0000325);; Biological Process: cell morphogenesis (GO:0000902);; Molecular Function: protease binding (GO:0002020);; Molecular Function: DNA photolyase activity (GO:0003913);; Molecular Function: ATP binding (GO:0005524);; Cellular Component: cell wall (GO:0005618);; Cellular Component: vacuolar membrane (GO:0005774);; Cellular Component: Golgi apparatus…	K02145|4e-28|sbi:SORBI_10g026440|hypothetical protein	V-type proton ATPase catalytic subunit A OS=Brassica napus PE=2 SV=1	vacuolar H+-ATPase catalytic subunit [Allium cepa]
c30274.graph_c0	284.012	84.9036	0	-1.80628	down	Carbohydrate transport and metabolism	Molecular Function: glucan exo-1,3-beta-glucosidase activity (GO:0004338);; Molecular Function: beta-galactosidase activity (GO:0004565);; Biological Process: alkaloid biosynthetic process (GO:0009821);; Cellular Component: cytoplasmic membrane-bounded vesicle (GO:0016023);; Molecular Function: beta-D-fucosidase activity (GO:0033907);; Molecular Function: beta-L-arabinosidase activity (GO:0047701…	K01188|0.0|sbi:SORBI_06g019840|hypothetical protein	Beta-glucosidase 12 OS=Oryza sativa subsp. japonica GN=BGLU12 PE=2 SV=2	putative strictosidine beta-D-glucosidase [Camptotheca acuminata]
c39291.graph_c0	1.27303	0.289806	4.07809e-05	-2.10318	down	Carbohydrate transport and metabolism	Cellular Component: vacuole (GO:0005773);; Molecular Function: xylan 1,4-beta-xylosidase activity (GO:0009044);; Cellular Component: plant-type cell wall (GO:0009505);; Biological Process: xylan catabolic process (GO:0045493);; Biological Process: L-arabinose metabolic process (GO:0046373);; Molecular Function: alpha-N-arabinofuranosidase activity (GO:0046556);; Cellular Component: apoplast (GO:0…	--	Alpha-L-arabinofuranosidase 1 OS=Arabidopsis thaliana GN=ASD1 PE=1 SV=1	Alpha-L-arabinofuranosidase 1 [Theobroma cacao]
c33531.graph_c0	61.3297	26.9167	4.60902e-09	-1.25143	down	General function prediction only	Cellular Component: mitochondrion (GO:0005739);; Molecular Function: RNA methyltransferase activity (GO:0008173);; Biological Process: chloroplast organization (GO:0009658);; Biological Process: tRNA methylation (GO:0030488);; Biological Process: protein targeting to chloroplast (GO:0045036);; Molecular Function: iron-sulfur cluster binding (GO:0051536);; Biological Process: rRNA base methylation…	K06941|0.0|rcu:RCOM_0000920|catalytic, putative	Probable dual-specificity RNA methyltransferase RlmN OS=Synechococcus sp. (strain JA-3-3Ab) GN=rlmN PE=3 SV=1	Radical SAM superfamily protein [Theobroma cacao]
c40145.graph_c0	10.4318	5.30701	0.000159197	-1.03527	down	--	--	--	--	hypothetical protein VITISV_008736 [Vitis vinifera]
c32230.graph_c0	88.551	45.5517	1.69765e-05	-1.02356	down	Energy production and conversion	Cellular Component: chloroplast (GO:0009507);; Cellular Component: membrane (GO:0016020);;	--	Putative membrane protein ycf1 OS=Nicotiana tomentosiformis GN=ycf1-A PE=3 SV=1	putative RF1 protein [Antirrhinum majus]
c24102.graph_c2	1.19099	0.321966	9.9899e-05	-1.88237	down	--	Molecular Function: transferase activity, transferring phosphorus-containing groups (GO:0016772);; Biological Process: cellular metabolic process (GO:0044237);; Molecular Function: organic cyclic compound binding (GO:0097159);; Molecular Function: heterocyclic compound binding (GO:1901363);;	--	Transposon TX1 uncharacterized 149 kDa protein OS=Xenopus laevis PE=4 SV=1	PREDICTED: uncharacterized protein LOC100786254 [Glycine max]
c24450.graph_c0	226.333	80.8856	7.77156e-15	-1.54813	down	--	--	--	Protein GAST1 OS=Solanum lycopersicum GN=GAST1 PE=2 SV=1	gibberellin induced protein [Sonneratia ovata]
c38527.graph_c0	11.2146	4.78163	6.03336e-07	-1.28781	down	--	Cellular Component: mitochondrion (GO:0005739);; Cellular Component: chloroplast (GO:0009507);; Biological Process: stomatal complex morphogenesis (GO:0010103);;	--	Pentatricopeptide repeat-containing protein At3g04760, chloroplastic OS=Arabidopsis thaliana GN=At3g04760 PE=2 SV=1	PREDICTED: pentatricopeptide repeat-containing protein At3g04760, chloroplastic-like [Vitis vinifera]
c26647.graph_c0	8.90781	1.047	0	-3.08614	down	--	Molecular Function: hydrolase activity, hydrolyzing O-glycosyl compounds (GO:0004553);; Cellular Component: cell wall (GO:0005618);; Biological Process: cellular glucan metabolic process (GO:0006073);; Molecular Function: xyloglucan:xyloglucosyl transferase activity (GO:0016762);; Cellular Component: apoplast (GO:0048046);;	K08235|1e-125|vvi:100252949|hypothetical protein LOC100252949	Probable xyloglucan endotransglucosylase/hydrolase protein 16 OS=Arabidopsis thaliana GN=XTH16 PE=2 SV=2	PREDICTED: probable xyloglucan endotransglucosylase/hydrolase protein 25-like [Solanum lycopersicum]
c31146.graph_c1	22.2784	5.79288	7.92872e-11	-1.98018	down	--	Molecular Function: nucleotide binding (GO:0000166);; Molecular Function: 3-beta-hydroxy-delta5-steroid dehydrogenase activity (GO:0003854);; Cellular Component: cytosol (GO:0005829);; Biological Process: steroid metabolic process (GO:0008202);; Biological Process: response to wounding (GO:0009611);; Biological Process: xylem and phloem pattern formation (GO:0010051);; Biological Process: cellula…	--	3-oxo-Delta(4,5)-steroid 5-beta-reductase OS=Arabidopsis thaliana GN=VEP1 PE=1 SV=1	putative progesterone 5 beta-reductase [Nicotiana tabacum]
c29787.graph_c2	83.7234	31.6191	6.22444e-08	-1.4589	down	--	Molecular Function: structural molecule activity (GO:0005198);; Cellular Component: chloroplast thylakoid membrane (GO:0009535);; Biological Process: photosynthesis, light harvesting (GO:0009765);; Cellular Component: light-harvesting complex (GO:0030076);; Molecular Function: metal ion binding (GO:0046872);;	K08914|1e-64|vvi:100251653|hypothetical protein LOC100251653	Chlorophyll a-b binding protein 13, chloroplastic OS=Solanum lycopersicum GN=CAB13 PE=1 SV=1	PREDICTED: chlorophyll a-b binding protein 13, chloroplastic-like [Solanum lycopersicum]
c42052.graph_c0	14.0155	3.24014	0	-2.16133	down	General function prediction only	Molecular Function: oxidoreductase activity, acting on paired donors, with incorporation or reduction of molecular oxygen, 2-oxoglutarate as one donor, and incorporation of one atom each of oxygen into both donors (GO:0016706);; Biological Process: single-organism metabolic process (GO:0044710);;	--	Protein SRG1 OS=Arabidopsis thaliana GN=SRG1 PE=2 SV=1	PREDICTED: protein SRG1-like [Solanum lycopersicum]
c38255.graph_c0	8.60607	4.07084	0.000356284	-1.13513	down	General function prediction only	Biological Process: metabolic process (GO:0008152);; Cellular Component: plastid (GO:0009536);; Molecular Function: hydrolase activity (GO:0016787);;	--	Uncharacterized hydrolase YugF OS=Bacillus subtilis (strain 168) GN=yugF PE=3 SV=1	PREDICTED: LOW QUALITY PROTEIN: haloalkane dehalogenase-like, partial [Cucumis sativus]
c32879.graph_c0	21.6441	6.05386	1.33227e-15	-1.89254	down	Function unknown	Cellular Component: chloroplast envelope (GO:0009941);; Cellular Component: integral component of membrane (GO:0016021);; Molecular Function: oxidoreductase activity (GO:0016491);; Biological Process: oxidation-reduction process (GO:0055114);;	--	Uncharacterized membrane protein YjcL OS=Bacillus subtilis (strain 168) GN=yjcL PE=4 SV=1	PREDICTED: uncharacterized membrane protein yjcL [Vitis vinifera]
c38491.graph_c0	17.9761	2.19538	0	-3.06281	down	--	Cellular Component: mitochondrion (GO:0005739);;	--	Pentatricopeptide repeat-containing protein At2g35130 OS=Arabidopsis thaliana GN=At2g35130 PE=2 SV=1	Tetratricopeptide repeat-like superfamily protein [Theobroma cacao]
c23127.graph_c0	157.165	61.4474	1.05371e-11	-1.41772	down	Translation, ribosomal structure and biogenesis	Molecular Function: RNA binding (GO:0003723);; Molecular Function: structural constituent of ribosome (GO:0003735);; Cellular Component: ribosome (GO:0005840);; Biological Process: pentose-phosphate shunt (GO:0006098);; Biological Process: rRNA processing (GO:0006364);; Biological Process: translation (GO:0006412);; Cellular Component: chloroplast stroma (GO:0009570);; Biological Process: photosy…	--	50S ribosomal protein L31, chloroplastic OS=Arabidopsis thaliana GN=RPL31 PE=2 SV=1	50S ribosomal protein L31, putative [Ricinus communis]
c25469.graph_c0	240.783	78.2538	0	-1.68492	down	Translation, ribosomal structure and biogenesis	Molecular Function: RNA binding (GO:0003723);; Molecular Function: structural constituent of ribosome (GO:0003735);; Biological Process: rRNA processing (GO:0006364);; Biological Process: translation (GO:0006412);; Cellular Component: chloroplast stroma (GO:0009570);; Biological Process: chloroplast relocation (GO:0009902);; Biological Process: thylakoid membrane organization (GO:0010027);; Cellu…	K02946|2e-77|vvi:100248042|hypothetical protein LOC100248042	30S ribosomal protein S10, chloroplastic OS=Mesembryanthemum crystallinum GN=RPS10 PE=2 SV=1	PREDICTED: 30S ribosomal protein S10, chloroplastic-like [Solanum lycopersicum]
c40740.graph_c0	81.1129	33.536	4.53123e-10	-1.33682	down	--	Cellular Component: chloroplast thylakoid (GO:0009534);; Cellular Component: chloroplast envelope (GO:0009941);;	--	Rhodanese-like domain-containing protein 10 OS=Arabidopsis thaliana GN=STR10 PE=2 SV=1	Rhodanese/Cell cycle control phosphatase superfamily protein [Theobroma cacao]
c29120.graph_c0	28.5497	11.3197	3.45041e-09	-1.39406	down	--	Cellular Component: chloroplast (GO:0009507);; Biological Process: leaf morphogenesis (GO:0009965);; Biological Process: mRNA modification (GO:0016556);; Biological Process: cell differentiation (GO:0030154);;	--	--	PREDICTED: uncharacterized protein LOC101267149 [Solanum lycopersicum]
c30874.graph_c0	50.9201	17.0782	1.11022e-16	-1.63989	down	--	Molecular Function: structural constituent of ribosome (GO:0003735);; Cellular Component: ribosome (GO:0005840);; Biological Process: translation (GO:0006412);; Cellular Component: chloroplast (GO:0009507);; Molecular Function: rRNA binding (GO:0019843);;	K02887|1e-60|vvi:4025123|rpl20	50S ribosomal protein L20, chloroplastic OS=Panax ginseng GN=rpl20 PE=3 SV=1	ribosomal protein L20 [Antirrhinum majus]
c14796.graph_c0	6.15995	0.726655	0.00977826	-2.68259	down	General function prediction only	Molecular Function: zinc ion binding (GO:0008270);; Molecular Function: geraniol dehydrogenase activity (GO:0047924);; Biological Process: oxidation-reduction process (GO:0055114);;	--	8-hydroxygeraniol dehydrogenase OS=Catharanthus roseus GN=10HGO PE=1 SV=1	RecName: Full=8-hydroxygeraniol dehydrogenase; Short=Cr10HGO
c1979.graph_c0	1.74824	0.394528	0.000395837	-2.09286	down	--	Biological Process: defense response (GO:0006952);; Molecular Function: ligase activity (GO:0016874);; Biological Process: detection of molecule of fungal origin (GO:0032491);; Biological Process: macromolecule localization (GO:0033036);; Biological Process: cellular response to stress (GO:0033554);; Biological Process: regulation of programmed cell death (GO:0043067);; Biological Process: cellul…	--	U-box domain-containing protein 21 OS=Arabidopsis thaliana GN=PUB21 PE=2 SV=1	immediate-early fungal elicitor protein CMPG1 [Petroselinum crispum]
c24055.graph_c0	1.99833	0.298051	2.3625e-07	-2.65424	down	Inorganic ion transport and metabolism	Cellular Component: plasma membrane (GO:0005886);; Biological Process: purine nucleobase transport (GO:0006863);; Biological Process: cellular ion homeostasis (GO:0006873);; Molecular Function: voltage-gated anion channel activity (GO:0008308);; Biological Process: response to humidity (GO:0009270);; Biological Process: response to abscisic acid (GO:0009737);; Biological Process: response to carb…	--	Guard cell S-type anion channel SLAC1 OS=Arabidopsis thaliana GN=SLAC1 PE=1 SV=1	PREDICTED: guard cell S-type anion channel SLAC1-like [Solanum lycopersicum]
c34546.graph_c0	4.42638	1.40777	0.000517785	-1.66485	down	--	Cellular Component: mitochondrion (GO:0005739);; Cellular Component: endoplasmic reticulum (GO:0005783);; Biological Process: response to auxin (GO:0009733);; Biological Process: regulation of cell proliferation (GO:0042127);; Biological Process: positive regulation of organ growth (GO:0046622);; Biological Process: regulation of developmental growth (GO:0048638);;	--	--	Auxin-regulated gene involved in organ size [Theobroma cacao]
c39741.graph_c0	6.52766	2.06157	8.64723e-07	-1.6984	down	Carbohydrate transport and metabolism	Molecular Function: xylulokinase activity (GO:0004856);; Biological Process: carbohydrate metabolic process (GO:0005975);; Cellular Component: chloroplast (GO:0009507);; Biological Process: phosphorylation (GO:0016310);;	--	Xylulose kinase OS=Bacillus subtilis (strain 168) GN=xylB PE=3 SV=2	unnamed protein product [Vitis vinifera]
c31266.graph_c0	10.2191	3.73028	1.18204e-06	-1.50136	down	--	Biological Process: maltose metabolic process (GO:0000023);; Molecular Function: methyltransferase activity (GO:0008168);; Biological Process: mRNA modification (GO:0016556);; Biological Process: starch biosynthetic process (GO:0019252);; Biological Process: methylation (GO:0032259);;	--	--	PREDICTED: uncharacterized protein LOC100250829 [Vitis vinifera]
c37467.graph_c0	89.1108	42.323	1.6146e-07	-1.13815	down	Defense mechanisms	Biological Process: drug transmembrane transport (GO:0006855);; Molecular Function: drug transmembrane transporter activity (GO:0015238);; Molecular Function: antiporter activity (GO:0015297);; Cellular Component: membrane (GO:0016020);;	--	Protein TRANSPARENT TESTA 12 OS=Arabidopsis thaliana GN=TT12 PE=2 SV=1	PREDICTED: protein TRANSPARENT TESTA 12-like [Solanum lycopersicum]
c28901.graph_c0	11.2704	4.85809	2.85e-06	-1.27086	down	--	Biological Process: glycerol metabolic process (GO:0006071);; Biological Process: lipid metabolic process (GO:0006629);; Molecular Function: glycerophosphodiester phosphodiesterase activity (GO:0008889);; Cellular Component: chloroplast (GO:0009507);; Cellular Component: membrane (GO:0016020);;	--	--	PREDICTED: uncharacterized protein LOC101255624 [Solanum lycopersicum]
c42048.graph_c0	22.3722	0	0	-7.97196	down	--	--	--	Dirigent protein 11 OS=Arabidopsis thaliana GN=DIR11 PE=2 SV=1	hypothetical protein M569_08466 [Genlisea aurea]
c30677.graph_c0	4.01862	0.316036	0.00245119	-3.05908	down	--	Cellular Component: extracellular region (GO:0005576);; Biological Process: stomatal complex patterning (GO:0010375);; Cellular Component: cytoplasmic membrane-bounded vesicle (GO:0016023);; Biological Process: negative regulation of stomatal complex development (GO:2000122);;	--	Protein EPIDERMAL PATTERNING FACTOR 1 OS=Arabidopsis thaliana GN=EPF1 PE=2 SV=1	predicted protein [Populus trichocarpa]
c24886.graph_c0	97.5048	44.674	2.87176e-08	-1.18982	down	--	Cellular Component: cell wall (GO:0005618);; Biological Process: cellular glucan metabolic process (GO:0006073);; Biological Process: response to water deprivation (GO:0009414);; Molecular Function: xyloglucan:xyloglucosyl transferase activity (GO:0016762);; Molecular Function: xyloglucan-specific endo-beta-1,4-glucanase activity (GO:0033946);; Cellular Component: apoplast (GO:0048046);;	K08235|1e-180|pop:POPTR_718004|hypothetical protein	Probable xyloglucan endotransglucosylase/hydrolase protein 7 OS=Arabidopsis thaliana GN=XTH7 PE=2 SV=2	xyloglucan endotransglucosylase/hydrolase [Gossypium hirsutum]
c40444.graph_c0	237.715	96.1361	1.46002e-11	-1.37018	down	Translation, ribosomal structure and biogenesis	Molecular Function: structural constituent of ribosome (GO:0003735);; Biological Process: pentose-phosphate shunt (GO:0006098);; Biological Process: DNA-templated transcription, elongation (GO:0006354);; Biological Process: rRNA processing (GO:0006364);; Biological Process: translation (GO:0006412);; Cellular Component: chloroplast stroma (GO:0009570);; Biological Process: plastid organization (G…	--	50S ribosomal protein L6, chloroplastic OS=Arabidopsis thaliana GN=RPL6 PE=2 SV=1	PREDICTED: 50S ribosomal protein L6, chloroplastic-like [Solanum lycopersicum]
c28682.graph_c0	4.03463	0.623258	0.00349858	-2.4701	down	General function prediction only	Molecular Function: triglyceride lipase activity (GO:0004806);; Biological Process: lipid catabolic process (GO:0016042);; Molecular Function: retinyl-palmitate esterase activity (GO:0050253);;	--	Triacylglycerol lipase 2 OS=Arabidopsis thaliana GN=LIP2 PE=2 SV=1	predicted protein [Populus trichocarpa]
c34593.graph_c0	139.326	72.588	1.43475e-05	-1.00476	down	--	Biological Process: maltose metabolic process (GO:0000023);; Molecular Function: serine-type endopeptidase activity (GO:0004252);; Biological Process: proteolysis (GO:0006508);; Cellular Component: chloroplast thylakoid (GO:0009534);; Cellular Component: chloroplastic endopeptidase Clp complex (GO:0009840);; Cellular Component: chloroplast envelope (GO:0009941);; Biological Process: starch biosyn…	K01358|1e-169|ath:AT1G02560|CLPP5	ATP-dependent Clp protease proteolytic subunit 5, chloroplastic OS=Arabidopsis thaliana GN=CLPP5 PE=1 SV=1	hypothetical protein PRUPE_ppa008823mg [Prunus persica]
c33282.graph_c0	2.9038	0.093037	1.62999e-05	-3.85237	down	Energy production and conversion	Molecular Function: alcohol dehydrogenase (NAD) activity (GO:0004022);; Molecular Function: zinc ion binding (GO:0008270);; Biological Process: oxidation-reduction process (GO:0055114);;	--	Alcohol dehydrogenase OS=Malus domestica GN=ADH PE=2 SV=1	alcohol dehydrogenase [Olea europaea]
c34515.graph_c0	47.3921	13.9579	0	-1.82237	down	--	Biological Process: protein folding (GO:0006457);; Biological Process: protein transport (GO:0015031);;	--	Trigger factor OS=Microcystis aeruginosa (strain NIES-843) GN=tig PE=3 SV=1	PREDICTED: trigger factor-like [Solanum lycopersicum]
c40307.graph_c0	1284.18	645.256	4.58535e-06	-1.05745	down	--	Cellular Component: chloroplast thylakoid membrane (GO:0009535);; Cellular Component: photosystem I reaction center (GO:0009538);; Cellular Component: plastoglobule (GO:0010287);; Biological Process: photosynthesis (GO:0015979);; Cellular Component: integral component of membrane (GO:0016021);;	K02695|3e-83|rcu:RCOM_1493780|Photosystem I reaction center subunit VI, chloroplast precursor, putative	Photosystem I reaction center subunit VI, chloroplastic OS=Spinacia oleracea GN=PSAH PE=1 SV=1	Photosystem I reaction center subunit VI, chloroplast precursor, putative [Ricinus communis]
c34815.graph_c0	3.00075	0.735495	5.61862e-05	-2.00933	down	--	Cellular Component: extracellular region (GO:0005576);; Biological Process: lipid metabolic process (GO:0006629);;	--	GDSL esterase/lipase At1g71691 OS=Arabidopsis thaliana GN=At1g71691 PE=2 SV=1	PREDICTED: GDSL esterase/lipase At1g71691-like [Solanum lycopersicum]
c21174.graph_c0	381.674	164.795	7.89144e-10	-1.27574	down	Carbohydrate transport and metabolism	Molecular Function: fructose-bisphosphate aldolase activity (GO:0004332);; Biological Process: glycolysis (GO:0006096);;	K01623|1e-130|vvi:100255859|hypothetical protein LOC100255859	Fructose-bisphosphate aldolase, chloroplastic OS=Spinacia oleracea PE=1 SV=3	PREDICTED: probable fructose-bisphosphate aldolase 2, chloroplastic-like [Solanum lycopersicum]
c32145.graph_c1	4.33665	0.456266	3.38028e-11	-3.13281	down	--	Cellular Component: nuclear ubiquitin ligase complex (GO:0000152);; Molecular Function: ubiquitin-protein ligase activity (GO:0004842);; Molecular Function: protein binding (GO:0005515);; Biological Process: DNA repair (GO:0006281);; Biological Process: shade avoidance (GO:0009641);; Biological Process: skotomorphogenesis (GO:0009647);; Biological Process: entrainment of circadian clock (GO:00096…	K10143|1e-152|vvi:100246063|hypothetical protein LOC100246063	E3 ubiquitin-protein ligase COP1 OS=Arabidopsis thaliana GN=COP1 PE=1 SV=2	unnamed protein product [Vitis vinifera]
c34033.graph_c0	14.7685	7.3991	0.000500305	-1.05501	down	Cell cycle control, cell division, chromosome partitioning	Cellular Component: chloroplast (GO:0009507);;	K06287|9e-90|rcu:RCOM_0440500|maf protein, putative	Maf-like protein DDB_G0281937 OS=Dictyostelium discoideum GN=DDB_G0281937 PE=3 SV=1	PREDICTED: maf-like protein DDB_G0281937-like [Solanum lycopersicum]
c1109.graph_c0	1.70449	0.337029	0.0019687	-2.22295	down	--	Biological Process: single-organism process (GO:0044699);;	--	--	hypothetical protein PRUPE_ppa005769mg [Prunus persica]
c39789.graph_c2	9.03358	4.24161	2.02779e-05	-1.14952	down	--	Cellular Component: mitochondrion (GO:0005739);; Cellular Component: plastid (GO:0009536);;	--	Pentatricopeptide repeat-containing protein At4g18520 OS=Arabidopsis thaliana GN=PCMP-A2 PE=2 SV=1	PREDICTED: pentatricopeptide repeat-containing protein At4g18520-like [Vitis vinifera]
c25785.graph_c0	4.30391	1.9346	0.00596003	-1.19763	down	--	Molecular Function: sugar:hydrogen symporter activity (GO:0005351);; Cellular Component: vacuolar membrane (GO:0005774);; Cellular Component: plasma membrane (GO:0005886);; Cellular Component: chloroplast (GO:0009507);; Cellular Component: integral component of membrane (GO:0016021);; Molecular Function: 2-alkenal reductase [NAD(P)] activity (GO:0032440);; Biological Process: carbohydrate transme…	--	Sugar transporter ERD6-like 7 OS=Arabidopsis thaliana GN=At2g48020 PE=2 SV=2	hypothetical protein M569_14807, partial [Genlisea aurea]
c38120.graph_c0	22.5945	7.41826	1.17639e-12	-1.66398	down	--	Cellular Component: nucleus (GO:0005634);; Cellular Component: chloroplast stroma (GO:0009570);; Cellular Component: chloroplast envelope (GO:0009941);; Biological Process: carotenoid biosynthetic process (GO:0016117);; Biological Process: isopentenyl diphosphate biosynthetic process, methylerythritol 4-phosphate pathway (GO:0019288);;	--	Uncharacterized serine-rich protein C215.13 OS=Schizosaccharomyces pombe (strain 972 / ATCC 24843) GN=SPBC215.13 PE=1 SV=1	unnamed protein product [Vitis vinifera]
c36169.graph_c0	14.0867	5.44351	1.8003e-06	-1.42253	down	--	Cellular Component: chloroplast (GO:0009507);; Biological Process: pollen development (GO:0009555);;	--	--	unnamed protein product [Vitis vinifera]
c34517.graph_c0	59.3648	26.2509	1.38879e-08	-1.24008	down	General function prediction only	Biological Process: response to singlet oxygen (GO:0000304);; Molecular Function: protein binding (GO:0005515);; Cellular Component: plasma membrane (GO:0005886);; Biological Process: rRNA processing (GO:0006364);; Biological Process: glycine catabolic process (GO:0006546);; Biological Process: unsaturated fatty acid biosynthetic process (GO:0006636);; Biological Process: phosphatidylglycerol bio…	--	Protein FLUORESCENT IN BLUE LIGHT, chloroplastic OS=Arabidopsis thaliana GN=FLU PE=1 SV=1	PREDICTED: protein FLUORESCENT IN BLUE LIGHT, chloroplastic-like [Solanum lycopersicum]
c19687.graph_c1	38.6228	18.0188	1.0134e-07	-1.16345	down	Posttranslational modification, protein turnover, chaperones	Molecular Function: serine-type endopeptidase activity (GO:0004252);; Cellular Component: nucleus (GO:0005634);; Cellular Component: mitochondrion (GO:0005739);; Biological Process: pentose-phosphate shunt (GO:0006098);; Biological Process: proteolysis (GO:0006508);; Cellular Component: chloroplast thylakoid membrane (GO:0009535);; Cellular Component: chloroplast thylakoid lumen (GO:0009543);; Bi…	--	Protease Do-like 1, chloroplastic OS=Arabidopsis thaliana GN=DEGP1 PE=1 SV=2	DegP protease 1 isoform 1 [Theobroma cacao]
c31994.graph_c1	11.3355	1.4709	1.11022e-16	-2.9321	down	--	Cellular Component: extracellular region (GO:0005576);; Cellular Component: vacuole (GO:0005773);; Biological Process: protein targeting to membrane (GO:0006612);; Biological Process: positive regulation of flavonoid biosynthetic process (GO:0009963);; Biological Process: regulation of plant-type hypersensitive response (GO:0010363);; Molecular Function: lipase activity (GO:0016298);;	--	GDSL esterase/lipase At1g28570 OS=Arabidopsis thaliana GN=At1g28570 PE=2 SV=1	predicted protein [Populus trichocarpa]
c28266.graph_c0	4.67133	0.420941	4.996e-15	-3.37037	down	--	Cellular Component: nucleus (GO:0005634);; Cellular Component: cytoplasm (GO:0005737);; Biological Process: protein targeting to membrane (GO:0006612);; Biological Process: response to water deprivation (GO:0009414);; Biological Process: response to wounding (GO:0009611);; Biological Process: response to fungus (GO:0009620);; Biological Process: jasmonic acid biosynthetic process (GO:0009695);; B…	--	Jasmonate O-methyltransferase OS=Arabidopsis thaliana GN=JMT PE=1 SV=3	Jasmonic acid carboxyl methyltransferase [Theobroma cacao]
c16571.graph_c0	5.69215	0.243768	0	-4.28029	down	--	Molecular Function: methyltransferase activity (GO:0008168);; Biological Process: methylation (GO:0032259);;	--	Salicylate O-methyltransferase OS=Clarkia breweri GN=SAMT PE=1 SV=1	S-adenosyl-L-methionine:salicylic acid methyltransferase [Antirrhinum majus]
c40593.graph_c0	149.668	66.2235	3.92202e-09	-1.2402	down	--	Biological Process: rRNA processing (GO:0006364);; Biological Process: tRNA metabolic process (GO:0006399);; Biological Process: aromatic amino acid family biosynthetic process (GO:0009073);; Cellular Component: chloroplast stroma (GO:0009570);; Biological Process: chloroplast organization (GO:0009658);; Biological Process: embryo development ending in seed dormancy (GO:0009793);; Cellular Compon…	--	DAG protein, chloroplastic OS=Antirrhinum majus GN=DAG PE=2 SV=1	RecName: Full=DAG protein, chloroplastic; Flags: Precursor
c16967.graph_c0	11.9899	5.06385	1.26616e-06	-1.30019	down	--	Molecular Function: nucleotide binding (GO:0000166);; Molecular Function: UDP-glucose 4-epimerase activity (GO:0003978);; Cellular Component: Golgi apparatus (GO:0005794);; Biological Process: galactose metabolic process (GO:0006012);; Biological Process: amino acid transport (GO:0006865);; Biological Process: nucleotide-sugar metabolic process (GO:0009225);; Biological Process: response to ethyl…	K12448|0.0|vvi:100259390|hypothetical protein LOC100259390	UDP-arabinose 4-epimerase 1 OS=Arabidopsis thaliana GN=MUR4 PE=1 SV=1	PREDICTED: UDP-arabinose 4-epimerase 1-like [Solanum lycopersicum]
c26381.graph_c2	4.54723	0.728459	1.56785e-06	-2.55317	down	Secondary metabolites biosynthesis, transport and catabolism	Molecular Function: iron ion binding (GO:0005506);; Biological Process: fatty acid metabolic process (GO:0006631);; Molecular Function: electron carrier activity (GO:0009055);; Molecular Function: alkane 1-monooxygenase activity (GO:0018685);; Molecular Function: oxygen binding (GO:0019825);; Molecular Function: heme binding (GO:0020037);; Biological Process: oxidation-reduction process (GO:00551…	--	Cytochrome P450 86A2 OS=Arabidopsis thaliana GN=CYP86A2 PE=2 SV=1	hypothetical protein M569_12832, partial [Genlisea aurea]
c32806.graph_c0	3.18078	0.291346	1.87406e-13	-3.32997	down	--	Molecular Function: nucleic acid binding (GO:0003676);;	--	Transposon TX1 uncharacterized 149 kDa protein OS=Xenopus laevis PE=4 SV=1	hypothetical protein M569_11401 [Genlisea aurea]
c28418.graph_c0	8.05546	0.858446	0	-3.19595	down	--	--	--	Protein IQ-DOMAIN 1 OS=Arabidopsis thaliana GN=IQD1 PE=1 SV=1	PREDICTED: protein IQ-DOMAIN 1-like [Solanum lycopersicum]
c38406.graph_c0	2.57483	0.804344	0.000237597	-1.69229	down	Secondary metabolites biosynthesis, transport and catabolism	Molecular Function: copper ion binding (GO:0005507);; Molecular Function: L-ascorbate oxidase activity (GO:0008447);; Cellular Component: plant-type cell wall (GO:0009505);; Cellular Component: membrane (GO:0016020);; Cellular Component: apoplast (GO:0048046);; Biological Process: oxidation-reduction process (GO:0055114);;	--	L-ascorbate oxidase homolog OS=Brassica napus GN=Bp10 PE=2 SV=1	PREDICTED: L-ascorbate oxidase homolog [Vitis vinifera]
c38512.graph_c0	34.1187	14.9398	8.40202e-09	-1.25422	down	--	Molecular Function: nucleotide binding (GO:0000166);; Biological Process: PSII associated light-harvesting complex II catabolic process (GO:0010304);; Biological Process: chlorophyll catabolic process (GO:0015996);; Molecular Function: chlorophyll(ide) b reductase activity (GO:0034256);; Cellular Component: plastid membrane (GO:0042170);; Biological Process: oxidation-reduction process (GO:005511…	K13606|0.0|rcu:RCOM_1052710|short-chain dehydrogenase, putative (EC:1.1.1.47)	Probable chlorophyll(ide) b reductase NYC1, chloroplastic OS=Arabidopsis thaliana GN=NYC1 PE=2 SV=1	putative chlorophyll b reductase [Nicotiana tabacum]
c28271.graph_c0	18.9979	9.85153	0.00038249	-1.00749	down	--	Molecular Function: binding (GO:0005488);; Biological Process: defense response (GO:0006952);; Biological Process: signal transduction (GO:0007165);; Biological Process: biosynthetic process (GO:0009058);; Biological Process: post-embryonic development (GO:0009791);; Biological Process: trichome differentiation (GO:0010026);; Biological Process: cellular component organization (GO:0016043);; Biol…	--	Zinc finger protein 4 OS=Arabidopsis thaliana GN=ZFP4 PE=2 SV=2	nucleic acid binding protein, putative [Ricinus communis]
c36410.graph_c2	17.6287	3.24323	0	-2.4734	down	--	Molecular Function: carboxypeptidase activity (GO:0004180);; Molecular Function: transferase activity (GO:0016740);;	--	Serine carboxypeptidase-like 18 OS=Arabidopsis thaliana GN=SCPL18 PE=2 SV=2	glucose acyltransferase [Solanum berthaultii]
c37707.graph_c0	134.421	52.9813	2.61335e-12	-1.40744	down	Translation, ribosomal structure and biogenesis	Biological Process: maltose metabolic process (GO:0000023);; Molecular Function: translation elongation factor activity (GO:0003746);; Molecular Function: GTPase activity (GO:0003924);; Molecular Function: ATP binding (GO:0005524);; Molecular Function: GTP binding (GO:0005525);; Cellular Component: mitochondrion (GO:0005739);; Biological Process: pentose-phosphate shunt (GO:0006098);; Biological …	K02355|0.0|rcu:RCOM_1679710|translation elongation factor G, putative	Elongation factor G, chloroplastic OS=Glycine max GN=FUSA PE=1 SV=1	PREDICTED: elongation factor G, chloroplastic-like [Solanum lycopersicum]
c15785.graph_c0	29.4801	6.14235	0	-2.31768	down	Cell wall/membrane/envelope biogenesis	Cellular Component: plastid chromosome (GO:0009508);; Cellular Component: chloroplast thylakoid membrane (GO:0009535);; Cellular Component: chloroplast envelope (GO:0009941);;	--	--	PREDICTED: uncharacterized protein LOC101263249 [Solanum lycopersicum]
c35902.graph_c1	4.39668	1.17459	4.42248e-05	-1.90235	down	--	--	--	Cell surface glycoprotein 1 OS=Clostridium thermocellum (strain ATCC 27405 / DSM 1237) GN=olpB PE=4 SV=2	predicted protein [Thalassiosira pseudonana CCMP1335]
c35907.graph_c0	22.7614	10.3441	4.94151e-07	-1.1989	down	--	--	--	Protein IQ-DOMAIN 1 OS=Arabidopsis thaliana GN=IQD1 PE=1 SV=1	PREDICTED: protein IQ-DOMAIN 1-like [Solanum lycopersicum]
c30084.graph_c0	8.16332	3.41943	2.22278e-05	-1.30746	down	General function prediction only	Biological Process: metabolic process (GO:0008152);; Molecular Function: Mo-molybdopterin cofactor sulfurase activity (GO:0008265);; Cellular Component: chloroplast (GO:0009507);; Molecular Function: molybdenum ion binding (GO:0030151);; Molecular Function: pyridoxal phosphate binding (GO:0030170);;	--	MOSC domain-containing protein 1, mitochondrial OS=Mus musculus GN=Marc1 PE=1 SV=2	Molybdenum cofactor sulfurase family protein isoform 1 [Theobroma cacao]
c35490.graph_c0	84.8444	23.3682	0	-1.92161	down	--	Biological Process: fatty acid biosynthetic process (GO:0006633);; Cellular Component: chloroplast (GO:0009507);; Molecular Function: acyl-[acyl-carrier-protein] desaturase activity (GO:0045300);; Molecular Function: transition metal ion binding (GO:0046914);; Biological Process: oxidation-reduction process (GO:0055114);;	K03921|6e-83|rcu:RCOM_1238330|Stearoy-ACP desaturase (EC:1.14.19.2)	Acyl-[acyl-carrier-protein] desaturase, chloroplastic OS=Carthamus tinctorius PE=1 SV=1	fatty acid desaturase [Hyacinthus orientalis]
c37555.graph_c0	99.525	44.4058	5.86754e-09	-1.22823	down	Intracellular trafficking, secretion, and vesicular transport	Molecular Function: protein binding (GO:0005515);; Cellular Component: plasma membrane (GO:0005886);; Biological Process: rRNA processing (GO:0006364);; Cellular Component: chloroplast thylakoid membrane (GO:0009535);; Biological Process: chloroplast relocation (GO:0009902);; Biological Process: thylakoid membrane organization (GO:0010027);; Biological Process: photosystem II assembly (GO:0010207…	K03217|0.0|vvi:100260431|hypothetical protein LOC100260431	Inner membrane protein PPF-1, chloroplastic OS=Pisum sativum GN=PPF-1 PE=2 SV=2	PREDICTED: inner membrane protein PPF-1, chloroplastic-like [Solanum lycopersicum]
c18910.graph_c0	6.38439	0.541467	1.24384e-08	-3.30993	down	Carbohydrate transport and metabolism	Molecular Function: sucrose alpha-glucosidase activity (GO:0004575);; Cellular Component: extracellular region (GO:0005576);; Cellular Component: cell wall (GO:0005618);; Biological Process: carbohydrate metabolic process (GO:0005975);;	--	Beta-fructofuranosidase, insoluble isoenzyme 1 OS=Daucus carota GN=INV1 PE=1 SV=1	cell-wall invertase [Orobanche ramosa]
c38079.graph_c0	17.5495	3.14697	0	-2.52642	down	Energy production and conversion	--	--	Chaperone protein DnaJ OS=Dictyoglomus thermophilum (strain ATCC 35947 / DSM 3960 / H-6-12) GN=dnaJ PE=3 SV=1	PREDICTED: uncharacterized protein LOC100247733 [Vitis vinifera]
c35548.graph_c0	18.5295	8.36314	3.49004e-06	-1.20661	down	Function unknown	Cellular Component: extracellular region (GO:0005576);; Cellular Component: chloroplast thylakoid membrane (GO:0009535);; Cellular Component: chloroplast thylakoid lumen (GO:0009543);;	--	Thylakoid lumenal protein At1g12250, chloroplastic OS=Arabidopsis thaliana GN=At1g12250 PE=1 SV=1	PREDICTED: thylakoid lumenal protein At1g12250, chloroplastic-like isoform 2 [Solanum lycopersicum]
c23953.graph_c0	26.5688	12.2657	5.05587e-06	-1.17468	down	--	Biological Process: aromatic amino acid family biosynthetic process (GO:0009073);; Cellular Component: chloroplast (GO:0009507);; Biological Process: photosystem II assembly (GO:0010207);; Biological Process: iron-sulfur cluster assembly (GO:0016226);; Biological Process: positive regulation of transcription, DNA-templated (GO:0045893);;	--	--	predicted protein [Populus trichocarpa]
c24388.graph_c0	9.53555	1.88477	0	-2.38322	down	--	Cellular Component: chloroplast (GO:0009507);;	--	--	conserved hypothetical protein [Ricinus communis]
c39247.graph_c0	38.2989	18.2373	2.19761e-07	-1.13419	down	Intracellular trafficking, secretion, and vesicular transport	Molecular Function: ATP binding (GO:0005524);; Cellular Component: plasma membrane (GO:0005886);; Biological Process: protein targeting (GO:0006605);; Cellular Component: chloroplast thylakoid membrane (GO:0009535);; Cellular Component: chloroplast stroma (GO:0009570);; Biological Process: response to absence of light (GO:0009646);; Biological Process: chloroplast organization (GO:0009658);; Cell…	K03070|0.0|vvi:100250268|similar to Protein translocase subunit secA, chloroplastic	Protein translocase subunit SECA1, chloroplastic OS=Arabidopsis thaliana GN=SECA1 PE=2 SV=2	PREDICTED: protein translocase subunit SECA1, chloroplastic-like [Solanum lycopersicum]
c27488.graph_c0	5.96272	0.694371	1.24821e-07	-2.94253	down	--	--	--	--	hypothetical protein MTR_8g022300 [Medicago truncatula]
c34715.graph_c0	117.856	27.9261	0	-2.14047	down	--	--	--	Proline-rich protein 4 OS=Arabidopsis thaliana GN=PRP4 PE=2 SV=1	proline-rich protein [Solanum tuberosum]
c27274.graph_c0	18.4496	1.15654	8.62532e-13	-3.73792	down	--	Biological Process: transcription, DNA-templated (GO:0006351);; Biological Process: response to abiotic stimulus (GO:0009628);; Biological Process: response to auxin (GO:0009733);; Biological Process: regulation of gene expression (GO:0010468);; Cellular Component: intracellular membrane-bounded organelle (GO:0043231);; Biological Process: single-organism process (GO:0044699);; Biological Process…	--	Auxin-responsive protein IAA7 OS=Arabidopsis thaliana GN=IAA7 PE=1 SV=1	PREDICTED: auxin-responsive protein IAA14-like isoform X2 [Cicer arietinum]
c38399.graph_c0	8.6411	2.10239	1.24345e-14	-2.08326	down	Amino acid transport and metabolism	Cellular Component: plasma membrane (GO:0005886);; Biological Process: response to wounding (GO:0009611);; Biological Process: response to nematode (GO:0009624);; Biological Process: response to abscisic acid (GO:0009737);; Biological Process: response to salicylic acid (GO:0009751);; Biological Process: response to jasmonic acid (GO:0009753);; Biological Process: hyperosmotic salinity response (…	--	Peptide transporter PTR3-B OS=Arabidopsis thaliana GN=PTR3-B PE=2 SV=1	PREDICTED: peptide transporter PTR3-A-like [Fragaria vesca subsp. vesca]
c13689.graph_c0	8.51409	1.86156	1.86184e-13	-2.225	down	--	--	--	WAT1-related protein At3g28050 OS=Arabidopsis thaliana GN=At3g28050 PE=2 SV=1	hypothetical protein M569_11314, partial [Genlisea aurea]
c35064.graph_c0	162.033	58.8579	2.93099e-14	-1.52449	down	Translation, ribosomal structure and biogenesis	Molecular Function: structural constituent of ribosome (GO:0003735);; Biological Process: rRNA processing (GO:0006364);; Biological Process: translation (GO:0006412);; Cellular Component: chloroplast stroma (GO:0009570);; Cellular Component: chloroplast envelope (GO:0009941);; Biological Process: thylakoid membrane organization (GO:0010027);; Biological Process: chlorophyll biosynthetic process (…	K02867|1e-109|ath:AT1G32990|PRPL11	50S ribosomal protein L11, chloroplastic OS=Arabidopsis thaliana GN=RPL11 PE=2 SV=1	Plastid ribosomal protein l11 [Theobroma cacao]
c32882.graph_c0	13.6997	5.15271	1.93371e-05	-1.45487	down	--	--	--	Uncharacterized 29.3 kDa protein OS=Orgyia pseudotsugata multicapsid polyhedrosis virus GN=ORF92 PE=4 SV=1	Uncharacterized protein TCM_019361 [Theobroma cacao]
c40465.graph_c0	259.799	101.934	1.92879e-12	-1.41404	down	Energy production and conversion	Biological Process: maltose metabolic process (GO:0000023);; Biological Process: rRNA processing (GO:0006364);; Biological Process: glycine catabolic process (GO:0006546);; Biological Process: unsaturated fatty acid biosynthetic process (GO:0006636);; Biological Process: oxidoreduction coenzyme metabolic process (GO:0006733);; Biological Process: vitamin metabolic process (GO:0006766);; Biologica…	K02115|0.0|rcu:RCOM_0904560|ATP synthase gamma chain 2, chloroplast, putative (EC:3.6.3.14)	ATP synthase gamma chain, chloroplastic OS=Nicotiana tabacum GN=ATPC PE=1 SV=1	ATPase, F1 complex, gamma subunit protein [Theobroma cacao]
c40567.graph_c0	216.382	66.6941	0	-1.76143	down	Translation, ribosomal structure and biogenesis	Molecular Function: RNA binding (GO:0003723);; Biological Process: rRNA processing (GO:0006364);; Cellular Component: chloroplast stroma (GO:0009570);; Cellular Component: chloroplast envelope (GO:0009941);; Biological Process: chlorophyll biosynthetic process (GO:0015995);; Cellular Component: membrane (GO:0016020);; Cellular Component: ribonucleoprotein complex (GO:0030529);;	--	30S ribosomal protein S20, chloroplastic OS=Arabidopsis thaliana GN=RPS20 PE=2 SV=1	PREDICTED: 30S ribosomal protein S20, chloroplastic-like [Solanum lycopersicum]
c38469.graph_c4	3.16051	1.18586	0.00118576	-1.44496	down	--	Cellular Component: cytoplasmic membrane-bounded vesicle (GO:0016023);;	--	--	PREDICTED: uncharacterized protein LOC100852669, partial [Vitis vinifera]
c41444.graph_c0	40.075	12.7546	1.84297e-14	-1.71038	down	Posttranslational modification, protein turnover, chaperones	Biological Process: protein peptidyl-prolyl isomerization (GO:0000413);; Molecular Function: peptidyl-prolyl cis-trans isomerase activity (GO:0003755);; Molecular Function: FK506 binding (GO:0005528);; Biological Process: protein folding (GO:0006457);; Cellular Component: chloroplast thylakoid membrane (GO:0009535);;	--	Peptidyl-prolyl cis-trans isomerase FKBP17-2, chloroplastic OS=Arabidopsis thaliana GN=FKBP17-2 PE=1 SV=1	predicted protein [Populus trichocarpa]
c29587.graph_c0	6.91539	0.388462	0	-4.04592	down	--	--	--	--	PREDICTED: uncharacterized protein LOC100854716 [Vitis vinifera]
c40663.graph_c0	142.84	31.6087	0	-2.23749	down	--	Molecular Function: ACP phosphopantetheine attachment site binding involved in fatty acid biosynthetic process (GO:0000036);; Biological Process: rRNA processing (GO:0006364);; Biological Process: fatty acid biosynthetic process (GO:0006633);; Cellular Component: chloroplast stroma (GO:0009570);; Biological Process: systemic acquired resistance (GO:0009627);; Biological Process: response to blue …	--	Acyl carrier protein 4, chloroplastic OS=Arabidopsis thaliana GN=ACP4 PE=1 SV=1	PREDICTED: acyl carrier protein 4, chloroplastic-like isoform X2 [Cicer arietinum]
c38592.graph_c0	4.61558	0.607601	2.71377e-06	-2.76961	down	--	--	--	--	gag-pol polyprotein [Phaseolus vulgaris]
c25586.graph_c0	60.2163	25.31	3.4053e-07	-1.30835	down	--	Molecular Function: calcium ion binding (GO:0005509);; Molecular Function: poly(U) RNA binding (GO:0008266);; Cellular Component: chloroplast thylakoid lumen (GO:0009543);; Cellular Component: chloroplast stroma (GO:0009570);; Cellular Component: photosystem II oxygen evolving complex (GO:0009654);; Cellular Component: chloroplast envelope (GO:0009941);; Biological Process: photosystem II assembl…	K02717|2e-28|pop:POPTR_551203|photosystem II reaction center psbP protein	Putative oxygen-evolving enhancer protein 2-2 OS=Arabidopsis thaliana GN=PSBP2 PE=5 SV=3	23 kDa OEC protein, partial [Salicornia veneta]
c39056.graph_c0	27.5471	10.4075	1.3767e-07	-1.45737	down	--	Cellular Component: nucleus (GO:0005634);; Biological Process: protein targeting to chloroplast (GO:0045036);; Biological Process: positive regulation of transcription, DNA-templated (GO:0045893);;	--	Protein CHLOROPLAST IMPORT APPARATUS 2 OS=Arabidopsis thaliana GN=CIA2 PE=2 SV=1	PREDICTED: protein CHLOROPLAST IMPORT APPARATUS 2-like [Solanum lycopersicum]
c34596.graph_c0	2.69361	0.593964	0.000102094	-2.13417	down	General function prediction only	Molecular Function: naringenin 3-dioxygenase activity (GO:0045486);; Biological Process: oxidation-reduction process (GO:0055114);;	--	Flavanone 3-dioxygenase OS=Petroselinum crispum GN=FHT PE=1 SV=1	flavanone 3-hydroxylase [Verbena x hybrida]
c34579.graph_c0	75.5908	28.8427	6.00187e-12	-1.45229	down	Function unknown	Cellular Component: membrane (GO:0016020);;	K02221|4e-77|vvi:100242172|hypothetical protein LOC100242172	Uncharacterized protein ycf19 OS=Guillardia theta GN=ycf19 PE=3 SV=1	PREDICTED: uncharacterized protein LOC101267629 [Solanum lycopersicum]
c35508.graph_c0	58.865	6.4046	0	-3.2542	down	--	Molecular Function: catalytic activity (GO:0003824);; Biological Process: pentose-phosphate shunt (GO:0006098);; Cellular Component: chloroplast thylakoid membrane (GO:0009535);; Biological Process: photosynthetic electron transport in photosystem I (GO:0009773);; Biological Process: myo-inositol hexakisphosphate biosynthetic process (GO:0010264);; Cellular Component: NAD(P)H dehydrogenase comple…	--	--	PREDICTED: uncharacterized protein LOC101263383 [Solanum lycopersicum]
c31666.graph_c0	30.4328	14.6681	1.90389e-06	-1.11533	down	--	Cellular Component: chloroplast (GO:0009507);; Biological Process: thylakoid membrane organization (GO:0010027);; Biological Process: photosystem II oxygen evolving complex assembly (GO:0010270);;	--	--	PREDICTED: uncharacterized protein LOC100245310 [Vitis vinifera]
c41538.graph_c0	27.5123	13.8943	1.08063e-05	-1.04835	down	Cell wall/membrane/envelope biogenesis	Molecular Function: metalloendopeptidase activity (GO:0004222);; Cellular Component: plasma membrane (GO:0005886);; Biological Process: proteolysis (GO:0006508);; Biological Process: chloroplast organization (GO:0009658);; Cellular Component: chloroplast inner membrane (GO:0009706);; Biological Process: photosystem II assembly (GO:0010207);; Cellular Component: integral component of membrane (GO:…	--	Putative zinc metalloprotease slr1821 OS=Synechocystis sp. (strain PCC 6803 / Kazusa) GN=slr1821 PE=3 SV=1	PREDICTED: putative zinc metalloprotease slr1821-like [Solanum lycopersicum]
c28076.graph_c0	4.56783	0.987875	0.00109711	-2.13043	down	--	Biological Process: phosphorelay signal transduction system (GO:0000160);; Cellular Component: nucleus (GO:0005634);; Cellular Component: cytoplasm (GO:0005737);; Molecular Function: histidine phosphotransfer kinase activity (GO:0009927);; Molecular Function: 2-alkenal reductase [NAD(P)] activity (GO:0032440);; Biological Process: oxidation-reduction process (GO:0055114);; Biological Process: reg…	K14490|2e-50|pop:POPTR_751856|histidine phosphotransfer protein	Histidine-containing phosphotransfer protein 4 OS=Arabidopsis thaliana GN=AHP4 PE=1 SV=2	hypothetical protein VITISV_008201 [Vitis vinifera]
c33729.graph_c0	1460.04	698.541	8.25296e-07	-1.12821	down	--	Molecular Function: ATP binding (GO:0005524);; Cellular Component: cell wall (GO:0005618);; Cellular Component: nucleus (GO:0005634);; Biological Process: response to cold (GO:0009409);; Biological Process: response to light stimulus (GO:0009416);; Cellular Component: chloroplast thylakoid membrane (GO:0009535);; Cellular Component: chloroplast envelope (GO:0009941);; Cellular Component: plastogl…	--	Ribulose bisphosphate carboxylase/oxygenase activase 2, chloroplastic OS=Larrea tridentata GN=RCA2 PE=2 SV=1	Ribulose bisphosphate carboxylase/oxygenase activase, chloroplastic isoform 1 [Theobroma cacao]
c23515.graph_c0	7.51237	0.792529	2.90189e-06	-3.0026	down	Carbohydrate transport and metabolism	Molecular Function: hydrolase activity, hydrolyzing O-glycosyl compounds (GO:0004553);; Biological Process: carbohydrate metabolic process (GO:0005975);; Molecular Function: carbohydrate binding (GO:0030246);;	--	Alpha-glucosidase OS=Spinacia oleracea PE=1 SV=1	PREDICTED: alpha-glucosidase-like [Solanum lycopersicum]
c32280.graph_c0	20.9043	10.3685	3.9688e-06	-1.07452	down	--	--	--	Chloroplastic group IIA intron splicing facilitator CRS1, chloroplastic OS=Oryza sativa subsp. japonica GN=Os08g0360100 PE=2 SV=1	PREDICTED: chloroplastic group IIA intron splicing facilitator CRS1, chloroplastic-like [Vitis vinifera]
c27723.graph_c0	9.23034	2.31036	3.02003e-12	-2.03724	down	Secondary metabolites biosynthesis, transport and catabolism	Molecular Function: iron ion binding (GO:0005506);; Molecular Function: electron carrier activity (GO:0009055);; Molecular Function: alkane 1-monooxygenase activity (GO:0018685);; Molecular Function: heme binding (GO:0020037);; Biological Process: oxidation-reduction process (GO:0055114);; Molecular Function: aromatase activity (GO:0070330);;	--	Cytochrome P450 94A1 OS=Vicia sativa GN=CYP94A1 PE=2 SV=2	PREDICTED: cytochrome P450 94A1 [Vitis vinifera]
c39527.graph_c0	1.87368	0.85385	0.00445062	-1.1801	down	--	Molecular Function: catalytic activity (GO:0003824);;	--	Putative ribonuclease H protein At1g65750 OS=Arabidopsis thaliana GN=At1g65750 PE=3 SV=1	PREDICTED: uncharacterized protein LOC101293221 [Fragaria vesca subsp. vesca]
c44153.graph_c0	3.80093	0.156575	1.06529e-08	-3.95831	down	General function prediction only	Molecular Function: oxidoreductase activity, acting on paired donors, with incorporation or reduction of molecular oxygen, 2-oxoglutarate as one donor, and incorporation of one atom each of oxygen into both donors (GO:0016706);; Biological Process: single-organism metabolic process (GO:0044710);;	--	Leucoanthocyanidin dioxygenase OS=Malus domestica GN=ANS PE=2 SV=1	predicted protein [Populus trichocarpa]
c37564.graph_c0	72.2678	34.2454	1.70443e-07	-1.14122	down	Coenzyme transport and metabolism	Molecular Function: oxygen-dependent protoporphyrinogen oxidase activity (GO:0004729);; Biological Process: protoporphyrinogen IX biosynthetic process (GO:0006782);; Cellular Component: chloroplast thylakoid (GO:0009534);; Cellular Component: chloroplast envelope (GO:0009941);; Biological Process: chlorophyll biosynthetic process (GO:0015995);; Biological Process: oxidation-reduction process (GO:…	K00231|0.0|vvi:100243415|hypothetical protein LOC100243415	Protoporphyrinogen oxidase, chloroplastic OS=Oryza sativa subsp. japonica GN=PPOX1 PE=2 SV=1	PREDICTED: protoporphyrinogen oxidase, chloroplastic [Vitis vinifera]
c27117.graph_c0	11.0524	3.86824	5.54554e-09	-1.56711	down	--	Cellular Component: plasma membrane (GO:0005886);; Molecular Function: magnesium ion transmembrane transporter activity (GO:0015095);; Biological Process: magnesium ion transport (GO:0015693);; Biological Process: cellular response to phosphate starvation (GO:0016036);; Biological Process: galactolipid biosynthetic process (GO:0019375);; Biological Process: negative regulation of transcription, D…	--	Magnesium transporter NIPA2 OS=Bos taurus GN=NIPA2 PE=2 SV=1	Non-imprinted in Prader-Willi/Angelman syndrome region protein [Theobroma cacao]
c14788.graph_c0	58.3844	23.0022	3.08589e-11	-1.4063	down	--	Cellular Component: plastid (GO:0009536);;	--	--	PREDICTED: uncharacterized protein LOC101205319 [Cucumis sativus]
c32002.graph_c1	9.52257	4.37878	3.85479e-06	-1.1805	down	--	Molecular Function: RNA binding (GO:0003723);; Molecular Function: RNA-directed DNA polymerase activity (GO:0003964);; Biological Process: RNA-dependent DNA replication (GO:0006278);; Cellular Component: plastid (GO:0009536);;	--	Putative ribonuclease H protein At1g65750 OS=Arabidopsis thaliana GN=At1g65750 PE=3 SV=1	hypothetical protein PRUPE_ppa026368mg, partial [Prunus persica]
c28383.graph_c0	28.0079	13.055	1.02069e-06	-1.16277	down	Signal transduction mechanisms	Molecular Function: protein serine/threonine phosphatase activity (GO:0004722);; Cellular Component: nucleolus (GO:0005730);; Biological Process: protein dephosphorylation (GO:0006470);; Cellular Component: protein serine/threonine phosphatase complex (GO:0008287);; Cellular Component: chloroplast stroma (GO:0009570);; Cellular Component: thylakoid (GO:0009579);; Biological Process: photosyntheti…	--	Protein phosphatase 2C 57 OS=Arabidopsis thaliana GN=PPH1 PE=2 SV=2	protein phosphatase 2C [Ilex paraguariensis]
c38021.graph_c2	1794.47	331.535	0	-2.50043	down	--	Cellular Component: cytoplasmic membrane-bounded vesicle (GO:0016023);; Molecular Function: hydrolase activity, acting on ester bonds (GO:0016788);;	--	GDSL esterase/lipase At5g03980 OS=Arabidopsis thaliana GN=At5g03980 PE=2 SV=1	acetylajmalan acetylesterase [Striga asiatica]
c20679.graph_c0	8.33106	1.81204	3.3995e-13	-2.23103	down	Energy production and conversion	Molecular Function: oxidoreductase activity, acting on the CH-OH group of donors, NAD or NADP as acceptor (GO:0016616);; Molecular Function: metal ion binding (GO:0046872);;	--	Alcohol dehydrogenase-like 3 OS=Arabidopsis thaliana GN=At1g32780 PE=2 SV=1	PREDICTED: LOW QUALITY PROTEIN: alcohol dehydrogenase-like 1-like [Vitis vinifera]
c32681.graph_c0	15.659	2.63793	0	-2.5908	down	--	Molecular Function: fatty-acyl-CoA reductase (alcohol-forming) activity (GO:0080019);;	--	Alcohol-forming fatty acyl-CoA reductase OS=Simmondsia chinensis PE=1 SV=1	PREDICTED: fatty acyl-CoA reductase 3-like [Solanum lycopersicum]
c14710.graph_c0	46.4684	22.7113	2.77655e-06	-1.09547	down	--	Molecular Function: structural molecule activity (GO:0005198);; Cellular Component: chloroplast thylakoid membrane (GO:0009535);; Cellular Component: plastoglobule (GO:0010287);; Cellular Component: thylakoid lumen (GO:0031977);;	--	Probable plastid-lipid-associated protein 13, chloroplastic OS=Arabidopsis thaliana GN=PAP13 PE=1 SV=2	uncharacterized protein LOC100779837 [Glycine max]
c33258.graph_c1	5.87235	2.20647	0.000306639	-1.44836	down	Function unknown	Biological Process: MAPK cascade (GO:0000165);; Molecular Function: protein serine/threonine kinase activity (GO:0004674);; Biological Process: protein phosphorylation (GO:0006468);; Molecular Function: oxidoreductase activity (GO:0016491);;	--	Probable LRR receptor-like serine/threonine-protein kinase At1g53440 OS=Arabidopsis thaliana GN=At1g53440 PE=1 SV=2	Leucine-rich repeat transmembrane protein kinase isoform 2 [Theobroma cacao]
c44036.graph_c0	1.87835	0.188943	9.70837e-07	-3.06953	down	--	Molecular Function: nucleotidyltransferase activity (GO:0016779);; Biological Process: primary metabolic process (GO:0044238);; Biological Process: cellular macromolecule metabolic process (GO:0044260);; Molecular Function: organic cyclic compound binding (GO:0097159);; Molecular Function: heterocyclic compound binding (GO:1901363);;	--	Uncharacterized mitochondrial protein AtMg00310 OS=Arabidopsis thaliana GN=AtMg00310 PE=4 SV=1	PREDICTED: putative ribonuclease H protein At1g65750-like [Glycine max]
c36931.graph_c0	4.51667	2.19929	0.00197051	-1.09189	down	--	Cellular Component: intracellular (GO:0005622);;	K12867|1e-123|rcu:RCOM_1063020|XPA-binding protein, putative	Pre-mRNA-splicing factor SYF1 OS=Rattus norvegicus GN=Xab2 PE=2 SV=1	Tetratricopeptide repeat-like superfamily protein [Theobroma cacao]
c33778.graph_c0	35.2166	0.0914862	0	-8.1175	down	Secondary metabolites biosynthesis, transport and catabolism	Molecular Function: binding (GO:0005488);; Molecular Function: oxidoreductase activity (GO:0016491);;	--	Secologanin synthase OS=Catharanthus roseus GN=CYP72A1 PE=2 SV=1	cytochrome P450 [Populus trichocarpa]
c36002.graph_c0	4.28583	0.30641	0	-3.70083	down	--	Molecular Function: transferase activity, transferring glycosyl groups (GO:0016757);;	--	UDP-glycosyltransferase 86A2 OS=Arabidopsis thaliana GN=UGT86A2 PE=2 SV=1	PREDICTED: UDP-glycosyltransferase 86A1-like [Solanum lycopersicum]
c25101.graph_c0	39.4098	15.4898	4.31714e-09	-1.40609	down	--	Biological Process: glycerol ether metabolic process (GO:0006662);; Molecular Function: electron carrier activity (GO:0009055);; Molecular Function: protein disulfide oxidoreductase activity (GO:0015035);; Biological Process: cell redox homeostasis (GO:0045454);;	--	Thioredoxin-like 3-1, chloroplastic OS=Arabidopsis thaliana GN=WCRKC1 PE=2 SV=3	PREDICTED: thioredoxin-like 3-1, chloroplastic-like [Solanum lycopersicum]
c24942.graph_c0	25.8684	12.4959	4.76314e-06	-1.11139	down	General function prediction only	Cellular Component: cytoplasm (GO:0005737);; Biological Process: metabolic process (GO:0008152);; Molecular Function: hydrolase activity (GO:0016787);;	--	Uncharacterized hydrolase YugF OS=Bacillus subtilis (strain 168) GN=yugF PE=3 SV=1	PREDICTED: uncharacterized hydrolase YugF-like [Solanum lycopersicum]
c26128.graph_c1	155.759	59.5394	1.92057e-12	-1.45043	down	--	Biological Process: response to stress (GO:0006950);; Cellular Component: chloroplast (GO:0009507);; Biological Process: response to abiotic stimulus (GO:0009628);; Biological Process: response to inorganic substance (GO:0010035);;	--	Probable glutathione S-transferase OS=Nicotiana tabacum PE=2 SV=1	unnamed protein product [Vitis vinifera]
c32431.graph_c0	10.2055	0.415458	0	-4.28151	down	--	--	--	Metallothionein-like protein 2 OS=Cicer arietinum PE=3 SV=2	metallothionein type 2a-FL [Elaeis guineensis]
c40752.graph_c0	89.8134	40.345	7.12689e-08	-1.21676	down	--	Cellular Component: extracellular region (GO:0005576);; Biological Process: protein targeting to membrane (GO:0006612);; Biological Process: lipid transport (GO:0006869);; Molecular Function: lipid binding (GO:0008289);; Biological Process: positive regulation of flavonoid biosynthetic process (GO:0009963);; Biological Process: regulation of plant-type hypersensitive response (GO:0010363);;	--	Probable non-specific lipid-transfer protein AKCS9 OS=Vigna unguiculata PE=2 SV=1	PREDICTED: probable non-specific lipid-transfer protein AKCS9-like [Cicer arietinum]
c38586.graph_c0	11.9412	5.70573	9.43622e-05	-1.12323	down	Coenzyme transport and metabolism	Biological Process: maltose metabolic process (GO:0000023);; Molecular Function: ATP binding (GO:0005524);; Biological Process: folic acid-containing compound biosynthetic process (GO:0009396);; Cellular Component: chloroplast (GO:0009507);; Biological Process: carotenoid biosynthetic process (GO:0016117);; Biological Process: starch biosynthetic process (GO:0019252);; Molecular Function: 5-formy…	K01934|1e-149|vvi:100248560|hypothetical protein LOC100248560	Methenyltetrahydrofolate synthase domain-containing protein OS=Bos taurus GN=MTHFSD PE=2 SV=1	PREDICTED: methenyltetrahydrofolate synthase domain-containing protein-like [Solanum lycopersicum]
c43234.graph_c0	4.03463	0.623258	0.00349858	-2.4701	down	--	--	--	--	hypothetical protein M569_09570, partial [Genlisea aurea]
c16517.graph_c0	2.18092	0.679194	0.00516887	-1.67503	down	--	Biological Process: maltose metabolic process (GO:0000023);; Biological Process: microtubule nucleation (GO:0007020);; Cellular Component: plant-type cell wall (GO:0009505);; Biological Process: positive regulation of flower development (GO:0009911);; Biological Process: leaf morphogenesis (GO:0009965);; Cellular Component: cytoplasmic membrane-bounded vesicle (GO:0016023);; Biological Process: s…	K07407|0.0|pop:POPTR_786149|alpha-galactosidase (EC:3.2.1.22)	Alpha-galactosidase OS=Coffea arabica PE=1 SV=1	alpha-galactosidase [Nicotiana tabacum]
c22775.graph_c1	14.7686	4.12451	2.41318e-12	-1.88762	down	--	Molecular Function: NAD+ kinase activity (GO:0003951);; Molecular Function: diacylglycerol kinase activity (GO:0004143);; Cellular Component: plasma membrane (GO:0005886);; Biological Process: protein kinase C-activating G-protein coupled receptor signaling pathway (GO:0007205);; Biological Process: pollen tube growth (GO:0009860);; Biological Process: phosphorylation (GO:0016310);; Biological Pr…	K00901|1e-109|vvi:100241035|hypothetical protein LOC100241035	Diacylglycerol kinase 4 OS=Arabidopsis thaliana GN=DGK4 PE=2 SV=1	PREDICTED: diacylglycerol kinase zeta-like [Solanum lycopersicum]
c26981.graph_c0	273.343	105.357	9.09717e-13	-1.43927	down	Translation, ribosomal structure and biogenesis	Molecular Function: structural constituent of ribosome (GO:0003735);; Cellular Component: ribosome (GO:0005840);; Biological Process: DNA-templated transcription, elongation (GO:0006354);; Biological Process: translation (GO:0006412);; Cellular Component: nucleoid (GO:0009295);; Cellular Component: chloroplast stroma (GO:0009570);; Cellular Component: chloroplast envelope (GO:0009941);; Biologica…	--	50S ribosomal protein L29, chloroplastic OS=Arabidopsis thaliana GN=RPL29 PE=1 SV=1	PREDICTED: 50S ribosomal protein L29, chloroplastic-like [Solanum lycopersicum]
c34278.graph_c0	24.1837	9.25827	3.33112e-09	-1.44307	down	--	Cellular Component: nucleus (GO:0005634);; Cellular Component: chloroplast thylakoid membrane (GO:0009535);; Cellular Component: chloroplast thylakoid lumen (GO:0009543);;	--	--	PREDICTED: uncharacterized protein LOC100249293 [Vitis vinifera]
c34108.graph_c0	126.609	56.064	6.9127e-09	-1.23865	down	Function unknown	Cellular Component: chloroplast thylakoid membrane (GO:0009535);; Cellular Component: chloroplast stroma (GO:0009570);; Cellular Component: chloroplast envelope (GO:0009941);; Biological Process: methylglyoxal catabolic process to D-lactate (GO:0019243);;	--	Nucleoid-associated protein Synpcc7942_0464 OS=Synechococcus elongatus (strain PCC 7942) GN=Synpcc7942_0464 PE=3 SV=2	hypothetical protein M569_05609 [Genlisea aurea]
c37522.graph_c0	75.1017	34.672	4.31799e-08	-1.17886	down	Amino acid transport and metabolism	Molecular Function: 3-deoxy-7-phosphoheptulonate synthase activity (GO:0003849);; Cellular Component: mitochondrion (GO:0005739);; Biological Process: aromatic amino acid family biosynthetic process (GO:0009073);; Biological Process: chorismate biosynthetic process (GO:0009423);; Cellular Component: chloroplast (GO:0009507);; Biological Process: response to wounding (GO:0009611);; Biological Proc…	K01626|0.0|pop:POPTR_559072|DHS4	Phospho-2-dehydro-3-deoxyheptonate aldolase 2, chloroplastic OS=Solanum tuberosum GN=SHKB PE=2 SV=1	3-deoxy-D-arabino-heptulosonate-7-phosphate synthase [Bacopa monnieri]
c23452.graph_c0	21.5825	0.180827	0	-6.54714	down	Carbohydrate transport and metabolism	Biological Process: maltose metabolic process (GO:0000023);; Biological Process: response to hypoxia (GO:0001666);; Molecular Function: fructose-bisphosphate aldolase activity (GO:0004332);; Biological Process: glycolysis (GO:0006096);; Biological Process: pentose-phosphate shunt (GO:0006098);; Cellular Component: chloroplast (GO:0009507);; Biological Process: anthocyanin-containing compound bios…	K01623|0.0|pop:POPTR_708143|fructose-bisphosphate aldolase (EC:4.1.2.13)	Fructose-bisphosphate aldolase, cytoplasmic isozyme 1 OS=Pisum sativum PE=1 SV=1	PREDICTED: fructose-bisphosphate aldolase, cytoplasmic isozyme 1-like [Glycine max]
c37029.graph_c0	25.3759	9.07108	4.55811e-11	-1.54237	down	--	--	--	GATA transcription factor 21 OS=Arabidopsis thaliana GN=GATA21 PE=1 SV=2	PREDICTED: uncharacterized protein LOC100261004 [Vitis vinifera]
c33732.graph_c0	36.0352	14.9006	5.00286e-09	-1.33495	down	Posttranslational modification, protein turnover, chaperones	Biological Process: protein peptidyl-prolyl isomerization (GO:0000413);; Molecular Function: peptidyl-prolyl cis-trans isomerase activity (GO:0003755);; Molecular Function: FK506 binding (GO:0005528);; Cellular Component: nucleus (GO:0005634);; Biological Process: protein folding (GO:0006457);; Cellular Component: chloroplast thylakoid membrane (GO:0009535);; Cellular Component: chloroplast thyla…	--	Peptidyl-prolyl cis-trans isomerase FKBP16-4, chloroplastic OS=Arabidopsis thaliana GN=FKBP16-4 PE=1 SV=1	PREDICTED: peptidyl-prolyl cis-trans isomerase FKBP16-4, chloroplastic-like [Solanum lycopersicum]
c39342.graph_c0	3.06354	1.35213	0.00552259	-1.22247	down	Posttranslational modification, protein turnover, chaperones	Molecular Function: ubiquitin-protein ligase activity (GO:0004842);; Biological Process: protein ubiquitination (GO:0016567);; Biological Process: developmental growth (GO:0048589);; Biological Process: root hair cell differentiation (GO:0048765);;	--	E3 ubiquitin-protein ligase ATL42 OS=Arabidopsis thaliana GN=ATL42 PE=1 SV=2	PREDICTED: E3 ubiquitin-protein ligase ATL42 [Vitis vinifera]
c29572.graph_c0	57.1504	29.8125	1.77956e-05	-1.00263	down	Carbohydrate transport and metabolism	Molecular Function: beta-mannosidase activity (GO:0004567);; Biological Process: carbohydrate metabolic process (GO:0005975);; Cellular Component: plant-type cell wall (GO:0009505);; Cellular Component: chloroplast (GO:0009507);; Cellular Component: cytosolic ribosome (GO:0022626);; Molecular Function: cation binding (GO:0043169);; Molecular Function: amygdalin beta-glucosidase activity (GO:00476…	--	Beta-glucosidase 44 OS=Arabidopsis thaliana GN=BGLU44 PE=2 SV=1	beta-mannosidase enzyme precursor [Solanum lycopersicum]
c35477.graph_c0	56.2558	19.4037	7.88258e-15	-1.59799	down	--	--	--	Polyneuridine-aldehyde esterase OS=Rauvolfia serpentina GN=PNAE PE=1 SV=1	predicted protein [Populus trichocarpa]
c42532.graph_c0	10.6686	0	2.22045e-16	-5.81693	down	--	--	--	UDP-glycosyltransferase 85A7 OS=Arabidopsis thaliana GN=UGT85A7 PE=2 SV=1	hypothetical protein M569_14056, partial [Genlisea aurea]
c28646.graph_c0	201.055	74.9135	9.84768e-14	-1.48812	down	General function prediction only	Molecular Function: RNA binding (GO:0003723);; Cellular Component: chloroplast thylakoid membrane (GO:0009535);; Cellular Component: chloroplast stroma (GO:0009570);; Biological Process: photosynthetic electron transport in photosystem I (GO:0009773);; Cellular Component: chloroplast envelope (GO:0009941);; Biological Process: isopentenyl diphosphate biosynthetic process, methylerythritol 4-phosp…	--	30S ribosomal protein 2, chloroplastic OS=Spinacia oleracea GN=PSRP2 PE=1 SV=1	PREDICTED: 30S ribosomal protein 2, chloroplastic-like [Glycine max]
c26654.graph_c1	20.579	8.41565	3.38056e-05	-1.33962	down	--	Cellular Component: chloroplast thylakoid membrane (GO:0009535);; Biological Process: response to ethylene (GO:0009723);; Cellular Component: chloroplast envelope (GO:0009941);; Biological Process: photosynthesis (GO:0015979);; Biological Process: chlorophyll biosynthetic process (GO:0015995);; Molecular Function: protochlorophyllide reductase activity (GO:0016630);; Biological Process: oxidation…	K00218|1e-128|pop:POPTR_827624|protochlorophyllide reductase (EC:1.3.1.33)	Protochlorophyllide reductase, chloroplastic OS=Pisum sativum GN=3PCR PE=1 SV=1	hypothetical protein M569_08082, partial [Genlisea aurea]
c25687.graph_c0	3.3007	0	0	-5.96866	down	--	--	--	--	PREDICTED: uncharacterized protein LOC101314079 [Fragaria vesca subsp. vesca]
c32484.graph_c0	33.7277	14.543	3.72485e-08	-1.27469	down	General function prediction only	Cellular Component: cytoplasm (GO:0005737);; Molecular Function: hydrolase activity (GO:0016787);;	--	Probable strigolactone esterase D14 homolog OS=Arabidopsis thaliana GN=D14 PE=1 SV=1	PREDICTED: sigma factor sigB regulation protein rsbQ isoform 1 [Vitis vinifera]
c33295.graph_c1	3.64315	1.29296	0.000808276	-1.51995	down	--	Molecular Function: enzyme inhibitor activity (GO:0004857);; Cellular Component: plant-type cell wall (GO:0009505);; Molecular Function: pectinesterase activity (GO:0030599);; Biological Process: cell wall modification (GO:0042545);; Biological Process: hydrogen peroxide catabolic process (GO:0042744);; Biological Process: negative regulation of catalytic activity (GO:0043086);; Molecular Functio…	--	Probable pectinesterase/pectinesterase inhibitor 34 OS=Arabidopsis thaliana GN=PME34 PE=2 SV=1	PREDICTED: probable pectinesterase/pectinesterase inhibitor 61-like [Solanum lycopersicum]
c37425.graph_c0	24.0816	4.53606	0	-2.45349	down	--	Cellular Component: extracellular region (GO:0005576);; Cellular Component: nucleus (GO:0005634);; Cellular Component: chloroplast (GO:0009507);; Biological Process: thylakoid membrane organization (GO:0010027);; Molecular Function: antioxidant activity (GO:0016209);; Molecular Function: oxidoreductase activity (GO:0016491);; Biological Process: oxidation-reduction process (GO:0055114);;	--	--	V(D)J recombination-activating protein 2 isoform 1 [Theobroma cacao]
c35853.graph_c0	65.693	27.686	2.72551e-10	-1.31031	down	Posttranslational modification, protein turnover, chaperones	Molecular Function: serine-type endopeptidase activity (GO:0004252);; Cellular Component: mitochondrion (GO:0005739);; Biological Process: proteolysis (GO:0006508);; Cellular Component: chloroplast stromal thylakoid (GO:0009533);; Cellular Component: chloroplast thylakoid membrane (GO:0009535);; Biological Process: chloroplast organization (GO:0009658);; Cellular Component: chloroplast envelope (…	--	Protease Do-like 2, chloroplastic OS=Arabidopsis thaliana GN=DEGP2 PE=1 SV=2	PREDICTED: protease Do-like 2, chloroplastic-like [Solanum lycopersicum]
c25062.graph_c2	41.6373	18.9177	2.40054e-07	-1.19986	down	--	Molecular Function: transferase activity, transferring acyl groups other than amino-acyl groups (GO:0016747);;	--	Pelargonidin 3-O-(6-caffeoylglucoside) 5-O-(6-O-malonylglucoside) 4&apos;&apos;&apos;-malonyltransferase OS=Salvia splendens PE=1 SV=1	predicted protein [Populus trichocarpa]
c42199.graph_c0	11.1627	5.70613	0.00270822	-1.02429	down	--	Cellular Component: chloroplast (GO:0009507);; Molecular Function: transferase activity (GO:0016740);;	--	Putative protein TPRXL OS=Homo sapiens GN=TPRXL PE=5 SV=2	PREDICTED: uncharacterized protein LOC101265139 [Solanum lycopersicum]
c32774.graph_c0	41.412	12.6439	5.32907e-15	-1.76931	down	--	Biological Process: protein peptidyl-prolyl isomerization (GO:0000413);; Molecular Function: peptidyl-prolyl cis-trans isomerase activity (GO:0003755);; Molecular Function: FK506 binding (GO:0005528);; Biological Process: pentose-phosphate shunt (GO:0006098);; Biological Process: rRNA processing (GO:0006364);; Biological Process: protein folding (GO:0006457);; Cellular Component: chloroplast thyl…	--	Peptidyl-prolyl cis-trans isomerase FKBP16-3, chloroplastic OS=Arabidopsis thaliana GN=FKBP16-3 PE=1 SV=2	PREDICTED: peptidyl-prolyl cis-trans isomerase FKBP16-3, chloroplastic-like [Cucumis sativus]
c36032.graph_c0	95.7824	47.2008	1.3402e-06	-1.08462	down	--	Molecular Function: aldose 1-epimerase activity (GO:0004034);; Biological Process: galactose metabolic process (GO:0006012);; Cellular Component: chloroplast stroma (GO:0009570);; Molecular Function: carbohydrate binding (GO:0030246);; Cellular Component: apoplast (GO:0048046);;	K01792|1e-170|vvi:100266694|hypothetical protein LOC100266694	Putative glucose-6-phosphate 1-epimerase OS=Cenchrus ciliaris PE=2 SV=1	PREDICTED: putative glucose-6-phosphate 1-epimerase-like [Solanum lycopersicum]
c34514.graph_c0	36.9587	14.6684	7.16774e-11	-1.39544	down	Lipid transport and metabolism	Biological Process: maltose metabolic process (GO:0000023);; Biological Process: sulfur amino acid metabolic process (GO:0000096);; Biological Process: pentose-phosphate shunt (GO:0006098);; Biological Process: glycine catabolic process (GO:0006546);; Biological Process: unsaturated fatty acid biosynthetic process (GO:0006636);; Biological Process: phosphatidylglycerol biosynthetic process (GO:00…	K00099|0.0|rcu:RCOM_1510580|1-deoxy-D-xylulose 5-phosphate reductoisomerase, chloroplast precursor, putative (EC:1.1.1.267)	1-deoxy-D-xylulose 5-phosphate reductoisomerase, chloroplastic OS=Mentha piperita GN=DXR PE=2 SV=2	1-deoxy-D-xylulose-5-phosphate reductoisomerase [Antirrhinum majus]
c40330.graph_c0	142.331	67.7383	2.02105e-07	-1.13565	down	--	Cellular Component: nucleus (GO:0005634);; Molecular Function: zinc ion binding (GO:0008270);;	--	Photosystem I reaction center subunit N, chloroplastic OS=Arabidopsis thaliana GN=PSAN PE=1 SV=2	PREDICTED: uncharacterized protein LOC100247174 [Vitis vinifera]
c38220.graph_c0	8.36825	3.22912	1.76252e-08	-1.43043	down	--	Molecular Function: anion channel activity (GO:0005253);; Cellular Component: plant-type vacuole membrane (GO:0009705);; Biological Process: malate transport (GO:0015743);;	--	Aluminum-activated malate transporter 9 OS=Arabidopsis thaliana GN=ALMT9 PE=2 SV=1	Aluminum-activated malate transporter 9 [Theobroma cacao]
c34611.graph_c0	33.549	11.706	6.19271e-12	-1.5777	down	--	Biological Process: rRNA processing (GO:0006364);; Biological Process: tRNA metabolic process (GO:0006399);; Biological Process: glycerol ether metabolic process (GO:0006662);; Molecular Function: electron carrier activity (GO:0009055);; Cellular Component: nucleoid (GO:0009295);; Cellular Component: chloroplast (GO:0009507);; Cellular Component: thylakoid (GO:0009579);; Biological Process: chlor…	--	Thioredoxin-like protein CITRX, chloroplastic OS=Arabidopsis thaliana GN=At3g06730 PE=1 SV=1	thioredoxin protein [Nicotiana benthamiana]
c41654.graph_c0	29.4322	11.635	1.8883e-11	-1.40184	down	General function prediction only	Molecular Function: DNA binding (GO:0003677);; Molecular Function: chromatin binding (GO:0003682);; Molecular Function: RNA binding (GO:0003723);; Cellular Component: chloroplast (GO:0009507);; Biological Process: embryo development ending in seed dormancy (GO:0009793);; Biological Process: photosynthesis (GO:0015979);; Molecular Function: hydrolase activity, acting on ester bonds (GO:0016788);; …	--	Ribonuclease J OS=Corynebacterium glutamicum (strain ATCC 13032 / DSM 20300 / JCM 1318 / LMG 3730 / NCIMB 10025) GN=Cgl1970 PE=3 SV=2	unnamed protein product [Vitis vinifera]
c36176.graph_c0	29.8577	5.54522	0	-2.48293	down	--	Biological Process: circadian rhythm (GO:0007623);;	--	Transcription factor LUX OS=Arabidopsis thaliana GN=LUX PE=1 SV=1	NbPCL1 [Nicotiana benthamiana]
c39584.graph_c1	45.0767	19.1602	6.75347e-10	-1.29768	down	Energy production and conversion	Molecular Function: structural constituent of ribosome (GO:0003735);; Cellular Component: plasma membrane (GO:0005886);; Biological Process: translation (GO:0006412);; Biological Process: transport (GO:0006810);; Molecular Function: NADH dehydrogenase (ubiquinone) activity (GO:0008137);; Cellular Component: chloroplast thylakoid membrane (GO:0009535);; Cellular Component: small ribosomal subunit …	--	NAD(P)H-quinone oxidoreductase subunit 2 A, chloroplastic OS=Coffea arabica GN=ndhB1 PE=3 SV=1	PREDICTED: NAD(P)H-quinone oxidoreductase subunit 2 A, chloroplastic-like [Solanum lycopersicum]
c39333.graph_c0	3.74901	1.25253	7.02714e-07	-1.62295	down	--	Cellular Component: mitochondrion (GO:0005739);;	--	Pentatricopeptide repeat-containing protein At1g71460, chloroplastic OS=Arabidopsis thaliana GN=PCMP-A3 PE=2 SV=1	PREDICTED: pentatricopeptide repeat-containing protein At1g71460, chloroplastic-like [Solanum lycopersicum]
c32109.graph_c0	690.926	211.18	0	-1.77423	down	--	Biological Process: response to stimulus (GO:0050896);;	--	Calvin cycle protein CP12-2, chloroplastic OS=Arabidopsis thaliana GN=CP12-2 PE=1 SV=1	hypothetical protein PRUPE_ppa013259mg [Prunus persica]
c32532.graph_c1	8.04566	2.95276	0.00463582	-1.46696	down	--	--	--	Dirigent protein 24 OS=Arabidopsis thaliana GN=DIR24 PE=2 SV=1	PREDICTED: uncharacterized protein LOC101266211 [Solanum lycopersicum]
c27322.graph_c0	28.6634	14.0403	4.55152e-06	-1.09192	down	Energy production and conversion	Cellular Component: chloroplast (GO:0009507);; Biological Process: chlorophyll cycle (GO:0033354);; Molecular Function: coenzyme F420 hydrogenase activity (GO:0050454);; Biological Process: oxidation-reduction process (GO:0055114);; Molecular Function: 7-hydroxymethyl chlorophyll a reductase activity (GO:0090415);;	K00441|0.0|vvi:100254621|hypothetical protein LOC100254621	7-hydroxymethyl chlorophyll a reductase, chloroplastic OS=Arabidopsis thaliana GN=HCAR PE=1 SV=1	PREDICTED: uncharacterized protein all1601 [Vitis vinifera]
c33335.graph_c0	6.42901	2.36662	0.000323334	-1.47549	down	--	Cellular Component: chloroplast (GO:0009507);; Biological Process: chlorophyll catabolic process (GO:0015996);;	--	Uncharacterized protein ycf36 OS=Cyanophora paradoxa GN=ycf36 PE=3 SV=1	conserved hypothetical protein [Ricinus communis]
c43280.graph_c0	4.81762	0.403315	4.74288e-05	-3.15692	down	--	Cellular Component: extracellular region (GO:0005576);; Cellular Component: plasma membrane (GO:0005886);; Biological Process: defense response (GO:0006952);; Cellular Component: plant-type cell wall (GO:0009505);; Molecular Function: peptidase inhibitor activity (GO:0030414);;	--	Defensin-like protein 2 OS=Arabidopsis thaliana GN=PDF2.2 PE=2 SV=1	putative gamma-thionin [Castanea sativa]
c38579.graph_c0	73.1182	32.3688	5.36567e-09	-1.23923	down	--	Cellular Component: chloroplast stroma (GO:0009570);; Cellular Component: thylakoid (GO:0009579);; Biological Process: chlororespiration (GO:0010478);;	--	--	PREDICTED: uncharacterized protein LOC101260209 isoform 1 [Solanum lycopersicum]
c38763.graph_c0	7.23889	2.65244	5.23706e-09	-1.50363	down	Defense mechanisms	Molecular Function: ATP binding (GO:0005524);; Cellular Component: vacuolar lumen (GO:0005775);; Cellular Component: plasma membrane (GO:0005886);; Biological Process: ATP catabolic process (GO:0006200);; Biological Process: amino acid transport (GO:0006865);; Biological Process: vacuolar transport (GO:0007034);; Biological Process: response to nematode (GO:0009624);; Molecular Function: organic …	--	ABC transporter G family member 1 OS=Arabidopsis thaliana GN=ABCG1 PE=2 SV=1	PREDICTED: ABC transporter G family member 1-like [Glycine max]
c13534.graph_c0	5.8583	2.91786	0.00344198	-1.05957	down	--	--	--	Protein IQ-DOMAIN 1 OS=Arabidopsis thaliana GN=IQD1 PE=1 SV=1	PREDICTED: protein IQ-DOMAIN 1-like [Vitis vinifera]
c36215.graph_c0	10.2445	4.06367	2.74294e-06	-1.38588	down	--	--	--	Probable WRKY transcription factor 35 OS=Arabidopsis thaliana GN=WRKY35 PE=2 SV=1	conserved hypothetical protein [Ricinus communis]
c40939.graph_c0	88.247	24.6976	0	-1.90063	down	Cell wall/membrane/envelope biogenesis	Molecular Function: transferase activity (GO:0016740);;	--	Cellulose synthase-like protein G2 OS=Arabidopsis thaliana GN=CSLG2 PE=2 SV=1	Cellulose synthase like G2, putative [Theobroma cacao]
c35663.graph_c0	10.5241	4.86141	1.90537e-05	-1.17233	down	--	Cellular Component: mitochondrion (GO:0005739);; Biological Process: response to salt stress (GO:0009651);; Biological Process: chloroplast organization (GO:0009658);; Biological Process: response to abscisic acid (GO:0009737);;	--	mTERF domain-containing protein 1, mitochondrial OS=Mus musculus GN=Mterfd1 PE=2 SV=1	PREDICTED: uncharacterized protein LOC101247175 [Solanum lycopersicum]
c40453.graph_c0	238.442	96.965	2.50359e-11	-1.36201	down	Translation, ribosomal structure and biogenesis	Biological Process: pentose-phosphate shunt (GO:0006098);; Cellular Component: chloroplast (GO:0009507);; Cellular Component: ribonucleoprotein complex (GO:0030529);;	--	50S ribosomal protein L35, chloroplastic OS=Spinacia oleracea GN=RPL35 PE=1 SV=1	PREDICTED: 50S ribosomal protein L35, chloroplastic-like [Solanum lycopersicum]
c39656.graph_c0	32.6578	14.5371	1.14436e-08	-1.23093	down	Carbohydrate transport and metabolism	Molecular Function: 6-phosphofructo-2-kinase activity (GO:0003873);; Molecular Function: fructose-2,6-bisphosphate 2-phosphatase activity (GO:0004331);; Molecular Function: ATP binding (GO:0005524);; Cellular Component: nucleus (GO:0005634);; Cellular Component: cytosol (GO:0005829);; Cellular Component: plasma membrane (GO:0005886);; Biological Process: fructose metabolic process (GO:0006000);; …	K01103|0.0|vvi:100244966|hypothetical protein LOC100244966	6-phosphofructo-2-kinase/fructose-2,6-bisphosphatase OS=Arabidopsis thaliana GN=FKFBP PE=1 SV=1	PREDICTED: 6-phosphofructo-2-kinase/fructose-2,6-biphosphatase 3 [Vitis vinifera]
c39580.graph_c0	6.58295	2.72158	2.15337e-06	-1.3291	down	--	Cellular Component: cytoplasm (GO:0005737);; Biological Process: chloroplast relocation (GO:0009902);; Biological Process: response to stimulus (GO:0050896);;	--	J domain-containing protein required for chloroplast accumulation response 1 OS=Arabidopsis thaliana GN=JAC1 PE=1 SV=1	heat shock protein binding protein, putative [Ricinus communis]
c29004.graph_c0	2.97345	0.877592	1.81176e-05	-1.77823	down	--	Biological Process: myo-inositol hexakisphosphate biosynthetic process (GO:0010264);;	--	Putative protein TPRXL OS=Homo sapiens GN=TPRXL PE=5 SV=2	PREDICTED: uncharacterized protein LOC100243866 [Vitis vinifera]
c28981.graph_c0	86.5436	15.8722	0	-2.50918	down	Posttranslational modification, protein turnover, chaperones	Biological Process: maltose metabolic process (GO:0000023);; Biological Process: protein peptidyl-prolyl isomerization (GO:0000413);; Molecular Function: peptidyl-prolyl cis-trans isomerase activity (GO:0003755);; Biological Process: protein folding (GO:0006457);; Cellular Component: chloroplast stroma (GO:0009570);; Biological Process: chloroplast relocation (GO:0009902);; Cellular Component: ch…	--	Trigger factor-like protein TIG OS=Arabidopsis thaliana GN=TIG PE=2 SV=1	PREDICTED: trigger factor isoform 1 [Vitis vinifera]
c17723.graph_c0	5.468	0.0965349	1.50415e-11	-4.68617	down	--	Biological Process: response to organic substance (GO:0010033);; Biological Process: regulation of cellular process (GO:0050794);; Biological Process: response to oxygen-containing compound (GO:1901700);;	--	Ethylene-responsive transcription factor ABR1 OS=Arabidopsis thaliana GN=ABR1 PE=2 SV=1	hypothetical protein VITISV_000884 [Vitis vinifera]
c37666.graph_c2	5.61195	2.15084	0.00237156	-1.41382	down	--	Molecular Function: DNA binding (GO:0003677);; Molecular Function: sequence-specific DNA binding transcription factor activity (GO:0003700);; Biological Process: regulation of transcription, DNA-templated (GO:0006355);; Biological Process: anthocyanin-containing compound biosynthetic process (GO:0009718);; Biological Process: response to sucrose (GO:0009744);; Biological Process: regulation of fl…	--	Transcription factor TT8 OS=Arabidopsis thaliana GN=TT8 PE=1 SV=2	uncharacterized protein LOC100251098 [Vitis vinifera]
c31247.graph_c0	28.3197	13.4428	1.52364e-05	-1.13466	down	--	Molecular Function: metal ion binding (GO:0046872);;	--	--	PREDICTED: uncharacterized protein LOC100258685 [Vitis vinifera]
c29624.graph_c1	45.5746	2.85315	0	-3.98142	down	--	Biological Process: maltose metabolic process (GO:0000023);; Biological Process: MAPK cascade (GO:0000165);; Biological Process: sucrose biosynthetic process (GO:0005986);; Biological Process: pentose-phosphate shunt (GO:0006098);; Biological Process: rRNA processing (GO:0006364);; Biological Process: protein targeting to membrane (GO:0006612);; Biological Process: response to cold (GO:0009409);;…	K01100|2e-81|pop:POPTR_567316|sedoheptulose-bisphosphatase (EC:3.1.3.37)	Sedoheptulose-1,7-bisphosphatase, chloroplastic OS=Spinacia oleracea PE=2 SV=1	chloroplast sedoheptulose-1,7-bisphosphatase [Solanum lycopersicum]
c42154.graph_c0	14.3829	5.90371	1.01962e-05	-1.33668	down	--	Cellular Component: chloroplast thylakoid membrane (GO:0009535);; Cellular Component: chloroplast envelope (GO:0009941);;	--	--	PREDICTED: uncharacterized protein LOC101251563 [Solanum lycopersicum]
c35193.graph_c0	27.0306	9.49354	8.35998e-13	-1.56989	down	Amino acid transport and metabolism	Molecular Function: shikimate kinase activity (GO:0004765);; Biological Process: glycine catabolic process (GO:0006546);; Biological Process: tryptophan catabolic process (GO:0006569);; Biological Process: unsaturated fatty acid biosynthetic process (GO:0006636);; Biological Process: oxidoreduction coenzyme metabolic process (GO:0006733);; Biological Process: vitamin metabolic process (GO:0006766…	K00891|9e-92|vvi:100266919|hypothetical protein LOC100266919	Probable inactive shikimate kinase like 1, chloroplastic OS=Arabidopsis thaliana GN=SKL1 PE=2 SV=1	Shikimate kinase, putative isoform 1 [Theobroma cacao]
c37612.graph_c0	55.7671	24.9648	6.79515e-09	-1.22348	down	Coenzyme transport and metabolism	Molecular Function: ATP binding (GO:0005524);; Cellular Component: chloroplast thylakoid (GO:0009534);; Cellular Component: chloroplast stroma (GO:0009570);; Biological Process: cytokinin metabolic process (GO:0009690);; Cellular Component: magnesium chelatase complex (GO:0010007);; Biological Process: photosynthesis (GO:0015979);; Biological Process: chlorophyll biosynthetic process (GO:0015995)…	K03404|0.0|vvi:100243048|hypothetical protein LOC100243048	Magnesium-chelatase subunit ChlD, chloroplastic OS=Nicotiana tabacum GN=CHLD PE=2 SV=1	PREDICTED: magnesium-chelatase subunit ChlD, chloroplastic-like [Cucumis sativus]
c36153.graph_c0	45.4912	22.4914	2.06433e-06	-1.07961	down	--	Cellular Component: chloroplast thylakoid membrane (GO:0009535);; Biological Process: stomatal complex morphogenesis (GO:0010103);; Biological Process: cysteine biosynthetic process (GO:0019344);; Biological Process: photosynthesis, light reaction (GO:0019684);;	--	Rhodanese-like domain-containing protein 9, chloroplastic OS=Arabidopsis thaliana GN=STR9 PE=2 SV=1	PREDICTED: rhodanese-like domain-containing protein 9, chloroplastic-like [Cucumis sativus]
c41755.graph_c0	27.9626	12.0949	8.38392e-09	-1.27144	down	Carbohydrate transport and metabolism	Biological Process: rRNA processing (GO:0006364);; Biological Process: tRNA metabolic process (GO:0006399);; Biological Process: pyrimidine ribonucleotide biosynthetic process (GO:0009220);; Biological Process: chloroplast organization (GO:0009658);; Biological Process: etioplast organization (GO:0009662);; Molecular Function: kinase activity (GO:0016301);; Biological Process: phosphorylation (GO…	--	Fructokinase-2 OS=Solanum lycopersicum GN=FRK2 PE=1 SV=2	PREDICTED: uncharacterized protein LOC101263810 [Solanum lycopersicum]
c15435.graph_c0	2.22787	0.741256	0.00141123	-1.60084	down	--	Molecular Function: polygalacturonase activity (GO:0004650);; Cellular Component: extracellular region (GO:0005576);; Biological Process: carbohydrate metabolic process (GO:0005975);;	--	Polygalacturonase At1g48100 OS=Arabidopsis thaliana GN=At1g48100 PE=2 SV=1	Pectin lyase-like superfamily protein [Theobroma cacao]
c41537.graph_c0	32.4565	15.9515	3.28892e-05	-1.08528	down	--	Biological Process: response to light intensity (GO:0009642);; Biological Process: regulation of gene expression (GO:0010468);; Cellular Component: plastid nucleoid (GO:0042646);;	--	--	PREDICTED: uncharacterized protein LOC101264624 [Solanum lycopersicum]
c29367.graph_c0	4.91888	0	3.59379e-07	-4.74955	down	--	Biological Process: drug transmembrane transport (GO:0006855);; Molecular Function: drug transmembrane transporter activity (GO:0015238);; Molecular Function: antiporter activity (GO:0015297);; Cellular Component: membrane (GO:0016020);; Cellular Component: cell part (GO:0044464);;	--	Protein TRANSPARENT TESTA 12 OS=Arabidopsis thaliana GN=TT12 PE=2 SV=1	PREDICTED: protein TRANSPARENT TESTA 12-like [Fragaria vesca subsp. vesca]
c42890.graph_c0	4.66353	0.490657	3.38028e-11	-3.13281	down	--	--	--	Dehydration-responsive element-binding protein 1F OS=Oryza sativa subsp. japonica GN=DREB1F PE=2 SV=1	CBF/DREB3 transcription factor [Vitis amurensis]
c44795.graph_c0	2.75059	0	1.12579e-05	-4.48766	down	--	--	--	Auxin-repressed 12.5 kDa protein OS=Fragaria ananassa PE=2 SV=1	auxin-repressed protein [Elaeis guineensis]
c34590.graph_c0	28.283	12.1909	6.05376e-08	-1.27479	down	--	Cellular Component: mitochondrion (GO:0005739);; Cellular Component: plastid (GO:0009536);; Molecular Function: heat shock protein binding (GO:0031072);; Molecular Function: unfolded protein binding (GO:0051082);;	--	--	PREDICTED: uncharacterized protein LOC101297359 [Fragaria vesca subsp. vesca]
c30734.graph_c0	22.3475	11.4931	1.4663e-05	-1.02261	down	--	Molecular Function: damaged DNA binding (GO:0003684);; Molecular Function: ATP binding (GO:0005524);; Cellular Component: nucleus (GO:0005634);; Biological Process: DNA repair (GO:0006281);; Biological Process: heme biosynthetic process (GO:0006783);; Molecular Function: ATP-dependent helicase activity (GO:0008026);;	--	Transcription-repair-coupling factor OS=Synechocystis sp. (strain PCC 6803 / Kazusa) GN=mfd PE=3 SV=1	PREDICTED: transcription-repair-coupling factor-like [Solanum lycopersicum]
c26323.graph_c0	42.7512	16.6288	2.27016e-10	-1.42296	down	Function unknown	Biological Process: pentose-phosphate shunt (GO:0006098);; Biological Process: unsaturated fatty acid biosynthetic process (GO:0006636);; Biological Process: response to cold (GO:0009409);; Cellular Component: chloroplast thylakoid membrane (GO:0009535);; Cellular Component: chloroplast thylakoid lumen (GO:0009543);; Biological Process: photosynthesis (GO:0015979);; Biological Process: chlorophyl…	--	Thylakoid lumenal 15 kDa protein 1, chloroplastic OS=Arabidopsis thaliana GN=At2g44920 PE=1 SV=2	Tetratricopeptide repeat-like superfamily protein isoform 1 [Theobroma cacao]
c30481.graph_c1	1.65633	0.488469	0.00796799	-1.73791	down	--	Molecular Function: DNA binding (GO:0003677);; Molecular Function: sequence-specific DNA binding transcription factor activity (GO:0003700);; Molecular Function: protein binding (GO:0005515);; Biological Process: response to salt stress (GO:0009651);; Biological Process: regulation of cellular process (GO:0050794);; Biological Process: cellular response to zinc ion (GO:0071294);;	--	--	hypothetical protein VITISV_033868 [Vitis vinifera]
c33772.graph_c0	508.378	237.833	8.18429e-08	-1.16041	down	Posttranslational modification, protein turnover, chaperones	Biological Process: MAPK cascade (GO:0000165);; Molecular Function: peroxidase activity (GO:0004601);; Cellular Component: mitochondrion (GO:0005739);; Biological Process: pentose-phosphate shunt (GO:0006098);; Biological Process: protein targeting to membrane (GO:0006612);; Biological Process: water transport (GO:0006833);; Biological Process: response to cold (GO:0009409);; Cellular Component: …	K03386|1e-138|ath:AT5G06290|2-Cys Prx B (2-Cysteine peroxiredoxin B)	2-Cys peroxiredoxin BAS1-like, chloroplastic OS=Arabidopsis thaliana GN=At5g06290 PE=2 SV=3	unknown [Medicago truncatula]
c28060.graph_c1	30.6749	12.7481	5.09064e-09	-1.32789	down	Lipid transport and metabolism	Molecular Function: nucleotide binding (GO:0000166);; Molecular Function: phosphogluconate dehydrogenase (decarboxylating) activity (GO:0004616);; Cellular Component: mitochondrion (GO:0005739);; Biological Process: pentose-phosphate shunt (GO:0006098);; Biological Process: valine metabolic process (GO:0006573);; Molecular Function: 3-hydroxyisobutyrate dehydrogenase activity (GO:0008442);; Molec…	--	Glyoxylate/succinic semialdehyde reductase 2, chloroplastic OS=Arabidopsis thaliana GN=GLYR2 PE=1 SV=1	PREDICTED: putative oxidoreductase GLYR1-like [Vitis vinifera]
c40284.graph_c0	10.6091	5.39449	0.000714555	-1.03392	down	--	--	--	--	putative transposase [Antirrhinum majus]
c27161.graph_c0	4.56664	0.554453	3.60598e-08	-2.90919	down	--	Biological Process: cell-cell signaling (GO:0007267);; Biological Process: stomatal complex patterning (GO:0010375);; Biological Process: mRNA modification (GO:0016556);; Biological Process: positive regulation of stomatal complex development (GO:2000123);;	--	EPIDERMAL PATTERNING FACTOR-like protein 9 OS=Arabidopsis thaliana GN=EPFL9 PE=1 SV=1	hypothetical protein [Camellia sinensis]
c37987.graph_c0	27.0605	2.44097	0	-3.50641	down	--	--	--	Zinc finger protein CONSTANS-LIKE 16 OS=Arabidopsis thaliana GN=COL16 PE=2 SV=2	PREDICTED: zinc finger protein CONSTANS-LIKE 16 [Vitis vinifera]
c41969.graph_c0	14.5213	6.52731	0.00596003	-1.19763	down	Cell wall/membrane/envelope biogenesis	Molecular Function: binding (GO:0005488);;	--	Zinc finger homeobox protein 4 OS=Gallus gallus GN=ZFHX4 PE=2 SV=2	hypothetical protein MTR_1g023270 [Medicago truncatula]
c27465.graph_c0	32.704	15.6815	6.53367e-06	-1.12144	down	Translation, ribosomal structure and biogenesis	Molecular Function: RNA binding (GO:0003723);; Biological Process: rRNA processing (GO:0006364);; Cellular Component: chloroplast (GO:0009507);; Biological Process: embryo development ending in seed dormancy (GO:0009793);; Biological Process: thylakoid membrane organization (GO:0010027);; Biological Process: vegetative to reproductive phase transition of meristem (GO:0010228);; Biological Process…	K02834|5e-88|vvi:100267621|hypothetical protein LOC100267621	Probable ribosome-binding factor A, chloroplastic OS=Arabidopsis thaliana GN=At4g34730 PE=2 SV=2	PREDICTED: probable ribosome-binding factor A, chloroplastic-like [Solanum lycopersicum]
c26965.graph_c0	220.891	114.593	1.20745e-05	-1.01084	down	--	Biological Process: amino acid transmembrane transport (GO:0003333);; Cellular Component: vacuole (GO:0005773);; Biological Process: response to cold (GO:0009409);; Biological Process: response to wounding (GO:0009611);; Cellular Component: chloroplast outer membrane (GO:0009707);; Biological Process: response to sucrose (GO:0009744);; Biological Process: response to glucose (GO:0009749);; Biolog…	--	Outer envelope pore protein 16, chloroplastic OS=Pisum sativum GN=OEP16 PE=1 SV=1	RecName: Full=Outer envelope pore protein 16, chloroplastic; AltName: Full=Chloroplastic outer envelope pore protein of 16 kDa
c18872.graph_c0	20.5314	4.08301	0	-2.36877	down	--	--	--	--	PREDICTED: arabinogalactan peptide 20-like [Solanum lycopersicum]
c26254.graph_c0	22.0527	7.37687	8.29337e-14	-1.63968	down	--	Biological Process: Group II intron splicing (GO:0000373);; Cellular Component: chloroplast (GO:0009507);;	--	CRS2-associated factor 2, chloroplastic OS=Arabidopsis thaliana GN=At1g23400 PE=2 SV=1	hypothetical protein M569_15368, partial [Genlisea aurea]
c36505.graph_c0	58.6695	7.07836	0	-3.0796	down	--	Cellular Component: intracellular organelle (GO:0043229);; Cellular Component: cytoplasmic part (GO:0044444);;	--	50S ribosomal protein 5, chloroplastic OS=Pisum sativum GN=PSRP5 PE=2 SV=1	PREDICTED: 50S ribosomal protein 5, chloroplastic-like [Solanum lycopersicum]
c31239.graph_c0	1.9727	0.396868	0.000274646	-2.23203	down	--	--	--	Glycosyltransferase-like domain-containing protein 2 OS=Bos taurus GN=GTDC2 PE=2 SV=1	Glycosyltransferase family 61 protein [Theobroma cacao]
c40480.graph_c0	241.233	97.3892	1.3906e-11	-1.37263	down	Translation, ribosomal structure and biogenesis	Molecular Function: structural constituent of ribosome (GO:0003735);; Cellular Component: ribosome (GO:0005840);; Biological Process: translation (GO:0006412);; Cellular Component: chloroplast stroma (GO:0009570);; Cellular Component: thylakoid (GO:0009579);; Biological Process: embryo development ending in seed dormancy (GO:0009793);; Cellular Component: chloroplast envelope (GO:0009941);; Biolo…	K02871|1e-113|vvi:100248623|hypothetical protein LOC100248623	50S ribosomal protein L13, chloroplastic OS=Arabidopsis thaliana GN=RPL13 PE=2 SV=1	PREDICTED: 50S ribosomal protein L13, chloroplastic-like [Solanum lycopersicum]
c16421.graph_c0	3.39383	1.02524	0.00051216	-1.73088	down	--	--	K13426|3e-68|vvi:100251862|hypothetical protein LOC100251862	Probable WRKY transcription factor 29 OS=Arabidopsis thaliana GN=WRKY29 PE=2 SV=1	WRKY22 [Catharanthus roseus]
c41579.graph_c0	29.9715	10.9693	2.24824e-07	-1.50049	down	--	--	--	--	predicted protein [Populus trichocarpa]
c35117.graph_c1	5.00401	1.58828	3.18108e-07	-1.69406	down	--	Molecular Function: protein binding (GO:0005515);; Cellular Component: nucleus (GO:0005634);; Biological Process: DNA mediated transformation (GO:0009294);; Biological Process: pathogenesis (GO:0009405);; Biological Process: jasmonic acid and ethylene-dependent systemic resistance (GO:0009861);; Biological Process: histone acetylation (GO:0016573);; Molecular Function: NAD-dependent histone deace…	K06067|0.0|vvi:100241833|hypothetical protein LOC100241833	Histone deacetylase 19 OS=Arabidopsis thaliana GN=HDA19 PE=1 SV=2	PREDICTED: histone deacetylase 19-like isoform 2 [Solanum lycopersicum]
c30261.graph_c0	331.449	120.938	2.0095e-14	-1.51846	down	--	Cellular Component: chloroplast thylakoid membrane (GO:0009535);; Cellular Component: photosystem I reaction center (GO:0009538);; Biological Process: photosynthesis (GO:0015979);;	K02693|3e-63|rcu:RCOM_1723530|photosystem I reaction center subunit IV A, chloroplast precursor	Photosystem I reaction center subunit IV B, chloroplastic OS=Nicotiana sylvestris GN=PSAEB PE=1 SV=1	photosystem I reaction center subunit IV A, chloroplast precursor [Ricinus communis]
c18307.graph_c1	5.91917	0.150603	1.74724e-07	-4.17307	down	--	Biological Process: metabolic process (GO:0008152);; Molecular Function: transferase activity, transferring hexosyl groups (GO:0016758);;	--	UDP-glycosyltransferase 83A1 OS=Arabidopsis thaliana GN=UGT83A1 PE=2 SV=1	PREDICTED: UDP-glycosyltransferase 85A1 [Vitis vinifera]
c31880.graph_c1	8.67481	1.85348	5.64881e-13	-2.25408	down	Carbohydrate transport and metabolism	Biological Process: carbohydrate metabolic process (GO:0005975);; Molecular Function: beta-glucosidase activity (GO:0008422);;	--	Lysosomal beta glucosidase OS=Dictyostelium discoideum GN=gluA PE=1 SV=2	hydrolase, hydrolyzing O-glycosyl compounds, putative [Ricinus communis]
c27779.graph_c0	109.67	44.1351	1.14401e-11	-1.3772	down	Lipid transport and metabolism	Molecular Function: iron ion binding (GO:0005506);; Biological Process: fatty acid biosynthetic process (GO:0006633);; Biological Process: wax biosynthetic process (GO:0010025);; Biological Process: cutin biosynthetic process (GO:0010143);; Cellular Component: integral component of membrane (GO:0016021);; Molecular Function: oxidoreductase activity (GO:0016491);; Biological Process: cuticle devel…	--	Protein ECERIFERUM 1 OS=Arabidopsis thaliana GN=CER1 PE=1 SV=1	PREDICTED: protein ECERIFERUM 1-like [Solanum lycopersicum]
c47543.graph_c0	2.2328	0	0.00160271	-4.0164	down	Nucleotide transport and metabolism	Molecular Function: nucleoside diphosphate kinase activity (GO:0004550);; Molecular Function: ATP binding (GO:0005524);; Cellular Component: vacuolar membrane (GO:0005774);; Cellular Component: peroxisome (GO:0005777);; Cellular Component: cytosol (GO:0005829);; Cellular Component: plasma membrane (GO:0005886);; Biological Process: nucleoside diphosphate phosphorylation (GO:0006165);; Biological …	K00940|2e-92|sbi:SORBI_01g028830|hypothetical protein	Nucleoside diphosphate kinase B OS=Flaveria bidentis PE=2 SV=1	nucleoside diphosphate kinase 1 [Camellia sinensis]
c29182.graph_c0	54.6137	23.6073	2.41694e-09	-1.27322	down	General function prediction only	Cellular Component: chloroplast stroma (GO:0009570);; Cellular Component: chloroplast envelope (GO:0009941);; Molecular Function: hydrolase activity (GO:0016787);; Biological Process: glucosinolate biosynthetic process (GO:0019761);;	--	Protein CbbY OS=Rhodobacter capsulatus GN=cbbY PE=3 SV=1	Haloacid dehalogenase-like hydrolase superfamily protein isoform 1 [Theobroma cacao]
c27838.graph_c0	18.9539	7.29534	4.80027e-07	-1.42999	down	--	Cellular Component: cytoplasm (GO:0005737);; Cellular Component: plasma membrane (GO:0005886);; Biological Process: response to oxidative stress (GO:0006979);;	--	Protein PLANT CADMIUM RESISTANCE 2 OS=Arabidopsis thaliana GN=PCR2 PE=1 SV=1	PREDICTED: protein PLANT CADMIUM RESISTANCE 2-like [Solanum lycopersicum]
c34587.graph_c0	17.352	6.46766	1.07655e-08	-1.47913	down	Coenzyme transport and metabolism	Molecular Function: glutaminase activity (GO:0004359);; Cellular Component: cytosol (GO:0005829);; Biological Process: glutamine metabolic process (GO:0006541);; Biological Process: pyridoxine biosynthetic process (GO:0008615);; Biological Process: embryo development ending in seed dormancy (GO:0009793);; Molecular Function: transferase activity (GO:0016740);; Molecular Function: protein heterodi…	K08681|1e-132|vvi:100267348|hypothetical protein LOC100267348	Pyridoxal biosynthesis protein PDX2 OS=Arabidopsis thaliana GN=PDX2 PE=1 SV=1	PREDICTED: pyridoxal biosynthesis protein PDX2-like [Vitis vinifera]
c13730.graph_c0	4.91281	0.733803	2.66454e-15	-2.74016	down	General function prediction only	Molecular Function: oxidoreductase activity, acting on paired donors, with incorporation or reduction of molecular oxygen, 2-oxoglutarate as one donor, and incorporation of one atom each of oxygen into both donors (GO:0016706);; Biological Process: single-organism metabolic process (GO:0044710);;	--	Gibberellin 2-beta-dioxygenase 8 OS=Arabidopsis thaliana GN=GA2OX8 PE=1 SV=2	gibberellin 2-oxidase 1 [Nicotiana sylvestris]
c40374.graph_c0	382.759	197.153	1.32293e-05	-1.02163	down	Energy production and conversion	Cellular Component: nucleus (GO:0005634);; Cellular Component: vacuole (GO:0005773);; Cellular Component: peroxisome (GO:0005777);; Cellular Component: chloroplast stroma (GO:0009570);; Biological Process: oxidative photosynthetic carbon pathway (GO:0009854);; Molecular Function: FMN binding (GO:0010181);; Cellular Component: membrane (GO:0016020);; Cellular Component: cytosolic ribosome (GO:0022…	K11517|0.0|pop:POPTR_583055|hypothetical protein	Peroxisomal (S)-2-hydroxy-acid oxidase OS=Spinacia oleracea PE=1 SV=1	glycolate oxidase [Nicotiana benthamiana]
c15502.graph_c0	3.86746	0.780648	4.95229e-06	-2.26682	down	--	--	--	--	Uncharacterized protein TCM_014522 [Theobroma cacao]
c32022.graph_c0	102.888	31.9933	0	-1.7478	down	--	Biological Process: pentose-phosphate shunt (GO:0006098);; Biological Process: phosphatidylglycerol biosynthetic process (GO:0006655);; Cellular Component: chloroplast stroma (GO:0009570);; Biological Process: isopentenyl diphosphate biosynthetic process, methylerythritol 4-phosphate pathway (GO:0019288);; Biological Process: response to karrikin (GO:0080167);; Biological Process: granum assembly…	--	Protein LHCP TRANSLOCATION DEFECT OS=Arabidopsis thaliana GN=LTD PE=1 SV=1	PREDICTED: protein LHCP TRANSLOCATION DEFECT-like [Fragaria vesca subsp. vesca]
c40043.graph_c0	45.2202	17.6467	1.18788e-11	-1.42029	down	Replication, recombination and repair	Molecular Function: DNA binding (GO:0003677);; Biological Process: DNA metabolic process (GO:0006259);;	--	MutS2 protein OS=Synechocystis sp. (strain PCC 6803 / Kazusa) GN=mutSB PE=3 SV=1	unnamed protein product [Vitis vinifera]
c27805.graph_c0	4.08244	1.74596	0.005892	-1.26438	down	--	--	--	UPF0544 protein C5orf45 homolog OS=Danio rerio GN=zgc:123335 PE=2 SV=1	PREDICTED: UPF0544 protein C5orf45-like [Solanum lycopersicum]
c36394.graph_c0	13.8316	1.80685	0	-2.96373	down	--	Biological Process: lipid metabolic process (GO:0006629);; Biological Process: stomatal complex morphogenesis (GO:0010103);; Biological Process: mRNA modification (GO:0016556);;	--	GDSL esterase/lipase At4g28780 OS=Arabidopsis thaliana GN=At4g28780 PE=2 SV=1	PREDICTED: GDSL esterase/lipase At5g33370-like [Solanum lycopersicum]
c33643.graph_c0	7.01185	0.24263	6.66134e-16	-4.40174	down	--	Cellular Component: mitochondrion (GO:0005739);; Biological Process: response to cytokinin (GO:0009735);;	--	--	hypothetical protein CARUB_v10010742mg [Capsella rubella]
c30201.graph_c0	23.023	11.5232	0.00034669	-1.05695	down	--	Cellular Component: mitochondrion (GO:0005739);; Biological Process: carotenoid biosynthetic process (GO:0016117);; Biological Process: glucosinolate biosynthetic process (GO:0019761);; Biological Process: protein autophosphorylation (GO:0046777);;	--	--	PREDICTED: uncharacterized protein LOC101303521 [Fragaria vesca subsp. vesca]
c37779.graph_c0	20.9775	10.6997	2.30456e-05	-1.03373	down	Cell cycle control, cell division, chromosome partitioning	Cellular Component: nucleus (GO:0005634);; Biological Process: rRNA processing (GO:0006364);; Cellular Component: chloroplast outer membrane (GO:0009707);; Biological Process: chloroplast relocation (GO:0009902);; Biological Process: thylakoid membrane organization (GO:0010027);; Biological Process: photosystem II assembly (GO:0010207);; Biological Process: regulation of protein dephosphorylation…	--	Protein CHUP1, chloroplastic OS=Arabidopsis thaliana GN=CHUP1 PE=1 SV=1	PREDICTED: protein CHUP1, chloroplastic-like [Vitis vinifera]
c43199.graph_c0	4.03461	0.427375	1.55961e-07	-3.04261	down	Carbohydrate transport and metabolism	Molecular Function: hydrolase activity, hydrolyzing O-glycosyl compounds (GO:0004553);; Biological Process: metabolic process (GO:0008152);;	--	Beta-glucosidase 10 OS=Oryza sativa subsp. japonica GN=BGLU10 PE=2 SV=1	unknown [Lotus japonicus]
c35467.graph_c1	13.8584	5.9126	4.69694e-07	-1.2872	down	Energy production and conversion	Molecular Function: electron carrier activity (GO:0009055);; Molecular Function: metal ion binding (GO:0046872);; Molecular Function: 4 iron, 4 sulfur cluster binding (GO:0051539);;	--	--	PREDICTED: uncharacterized protein LOC101267213 [Solanum lycopersicum]
c34825.graph_c0	333.975	153.403	2.72061e-08	-1.18682	down	--	Biological Process: flavonoid biosynthetic process (GO:0009813);; Molecular Function: naringenin-chalcone synthase activity (GO:0016210);;	--	Chalcone synthase OS=Antirrhinum majus GN=CHS PE=3 SV=1	RecName: Full=Chalcone synthase; AltName: Full=Naringenin-chalcone synthase
c40932.graph_c0	96.0027	26.8093	0	-1.90288	down	General function prediction only	Biological Process: pentose-phosphate shunt (GO:0006098);; Cellular Component: chloroplast stroma (GO:0009570);; Cellular Component: chloroplast envelope (GO:0009941);; Biological Process: thylakoid membrane organization (GO:0010027);; Biological Process: stomatal complex morphogenesis (GO:0010103);; Biological Process: carotenoid biosynthetic process (GO:0016117);; Molecular Function: hydrolase …	--	Protein CbbY OS=Rhodobacter capsulatus GN=cbbY PE=3 SV=1	PREDICTED: protein CbbY-like [Solanum lycopersicum]
c30177.graph_c0	7.08027	2.77455	0.00018296	-1.39356	down	Posttranslational modification, protein turnover, chaperones	Biological Process: protein peptidyl-prolyl isomerization (GO:0000413);; Molecular Function: peptidyl-prolyl cis-trans isomerase activity (GO:0003755);; Molecular Function: FK506 binding (GO:0005528);; Biological Process: protein folding (GO:0006457);; Cellular Component: chloroplast thylakoid membrane (GO:0009535);; Cellular Component: chloroplast thylakoid lumen (GO:0009543);;	--	Peptidyl-prolyl cis-trans isomerase FKBP19, chloroplastic OS=Arabidopsis thaliana GN=FKBP19 PE=1 SV=1	PREDICTED: peptidyl-prolyl cis-trans isomerase FKBP19, chloroplastic-like [Solanum lycopersicum]
c31356.graph_c0	13.7468	5.95636	7.7516e-08	-1.26727	down	--	--	--	F-box protein At2g16365 OS=Arabidopsis thaliana GN=At2g16365 PE=2 SV=2	PREDICTED: F-box protein At2g16365-like [Vitis vinifera]
c34214.graph_c0	9.84878	0.676815	0	-3.82476	down	--	Molecular Function: magnesium ion binding (GO:0000287);; Molecular Function: sesquiterpene synthase activity (GO:0010334);; Biological Process: sesquiterpene biosynthetic process (GO:0051762);;	--	Alpha-farnesene synthase OS=Ricinus communis GN=TPS7 PE=1 SV=2	terpene synthase 2 [Olea europaea]
c24602.graph_c1	3.56182	0.453825	5.55112e-16	-2.95024	down	--	--	--	--	hypothetical protein M569_17686, partial [Genlisea aurea]
c24728.graph_c0	10.7207	5.2005	0.000517675	-1.09968	down	--	Molecular Function: hydrolase activity, hydrolyzing O-glycosyl compounds (GO:0004553);; Cellular Component: extracellular region (GO:0005576);; Biological Process: carbohydrate metabolic process (GO:0005975);; Biological Process: defense response (GO:0006952);; Cellular Component: cell part (GO:0044464);; Biological Process: response to other organism (GO:0051707);;	--	Glucan endo-1,3-beta-glucosidase, acidic isoform PR-Q&apos; OS=Nicotiana tabacum PE=1 SV=1	beta-1,3-glucanase [Olea europaea]
c29008.graph_c0	22.5449	3.42942	0	-2.767	down	Secondary metabolites biosynthesis, transport and catabolism	Molecular Function: monooxygenase activity (GO:0004497);; Biological Process: defense response (GO:0006952);; Molecular Function: oxidoreductase activity, acting on paired donors, with incorporation or reduction of molecular oxygen (GO:0016705);; Biological Process: indole-containing compound biosynthetic process (GO:0042435);; Biological Process: oxoacid metabolic process (GO:0043436);; Cellular…	--	Cytochrome P450 71A1 OS=Persea americana GN=CYP71A1 PE=1 SV=2	PREDICTED: cytochrome P450 83B1 [Vitis vinifera]
c37540.graph_c0	156.509	68.752	2.41126e-09	-1.2507	down	--	Molecular Function: nucleotide binding (GO:0000166);; Biological Process: polysaccharide catabolic process (GO:0000272);; Molecular Function: 3-beta-hydroxy-delta5-steroid dehydrogenase activity (GO:0003854);; Molecular Function: copper ion binding (GO:0005507);; Cellular Component: plasma membrane (GO:0005886);; Biological Process: starch metabolic process (GO:0005982);; Biological Process: rRNA…	--	Uncharacterized protein At2g37660, chloroplastic OS=Arabidopsis thaliana GN=At2g37660 PE=1 SV=2	PREDICTED: uncharacterized protein At2g37660, chloroplastic-like [Solanum lycopersicum]
c14508.graph_c1	52.524	17.8987	1.33227e-15	-1.61596	down	--	Biological Process: developmental process (GO:0032502);; Biological Process: single-organism process (GO:0044699);;	--	Transcription factor TCP4 OS=Arabidopsis thaliana GN=TCP4 PE=2 SV=1	mutant cincinnata [Antirrhinum majus]
c34798.graph_c0	5.34989	1.8193	1.0886e-06	-1.59802	down	--	Biological Process: plasma membrane repair (GO:0001778);; Cellular Component: endosome (GO:0005768);; Cellular Component: vacuole (GO:0005773);; Cellular Component: Golgi apparatus (GO:0005794);; Cellular Component: plasma membrane (GO:0005886);; Biological Process: endocytosis (GO:0006897);; Biological Process: protein secretion (GO:0009306);; Biological Process: response to cold (GO:0009409);; …	--	Synaptotagmin-2 OS=Arabidopsis thaliana GN=SYT2 PE=2 SV=1	PREDICTED: synaptotagmin-3-like [Solanum lycopersicum]
c32283.graph_c0	10.8504	2.61735	3.33067e-16	-2.09911	down	Secondary metabolites biosynthesis, transport and catabolism	Molecular Function: iron ion binding (GO:0005506);; Cellular Component: endoplasmic reticulum membrane (GO:0005789);; Molecular Function: electron carrier activity (GO:0009055);; Cellular Component: integral component of membrane (GO:0016021);; Biological Process: monoterpenoid biosynthetic process (GO:0016099);; Molecular Function: oxidoreductase activity, acting on paired donors, with incorpora…	--	Geraniol 8-hydroxylase OS=Swertia mussotii GN=CYP76B10 PE=1 SV=1	geraniol 10-hydroxylase [Picrorhiza kurrooa]
c39621.graph_c0	31.6692	15.6385	1.31617e-06	-1.08179	down	--	Biological Process: maltose metabolic process (GO:0000023);; Biological Process: phosphatidylglycerol biosynthetic process (GO:0006655);; Biological Process: aromatic amino acid family biosynthetic process (GO:0009073);; Cellular Component: chloroplast stroma (GO:0009570);; Biological Process: embryo development ending in seed dormancy (GO:0009793);; Biological Process: chloroplast relocation (GO…	--	Ribulose-1,5 bisphosphate carboxylase/oxygenase large subunit N-methyltransferase, chloroplastic OS=Nicotiana tabacum GN=RBCMT PE=2 SV=1	RecName: Full=Ribulose-1,5 bisphosphate carboxylase/oxygenase large subunit N-methyltransferase, chloroplastic; AltName: Full=[Ribulose-bisphosphate carboxylase]-lysine N-methyltransferase; Short=RuBisCO LSMT; Short=RuBisCO methyltransferase; Short=rbcMT; Flags: Precursor
c33515.graph_c0	8.79	1.31607	1.11022e-16	-2.74402	down	Lipid transport and metabolism	Biological Process: metabolic process (GO:0008152);; Molecular Function: hydrolase activity (GO:0016787);;	--	Probable carboxylesterase 15 OS=Arabidopsis thaliana GN=CXE15 PE=2 SV=1	PREDICTED: probable carboxylesterase 15 [Vitis vinifera]
c40184.graph_c0	11.324	4.23718	7.81682e-08	-1.47145	down	--	--	--	--	unnamed protein product [Vitis vinifera]
c41935.graph_c0	24.8312	4.44431	1.22125e-15	-2.50278	down	--	Cellular Component: Golgi apparatus (GO:0005794);; Cellular Component: extracellular matrix (GO:0031012);; Biological Process: developmental process (GO:0032502);; Biological Process: single-organism process (GO:0044699);;	--	Phytosulfokines 3 OS=Arabidopsis thaliana GN=PSK3 PE=2 SV=2	phytosulfokine precursor [Avicennia marina]
c38541.graph_c0	10.0208	3.59006	1.90612e-07	-1.53008	down	--	Molecular Function: nucleic acid binding (GO:0003676);; Cellular Component: nucleus (GO:0005634);; Molecular Function: 3'-5' exonuclease activity (GO:0008408);;	--	--	hypothetical protein M569_07843, partial [Genlisea aurea]
c32015.graph_c0	43.6112	21.4187	7.84989e-06	-1.08771	down	--	Cellular Component: chloroplast thylakoid (GO:0009534);; Biological Process: response to red or far red light (GO:0009639);; Biological Process: response to light intensity (GO:0009642);;	--	--	one-helix protein [Ipomoea nil]
c26153.graph_c0	2.4782	0.58468	1.1063e-05	-2.06789	down	--	Molecular Function: protein serine/threonine kinase activity (GO:0004674);; Molecular Function: protein binding (GO:0005515);; Molecular Function: ATP binding (GO:0005524);; Cellular Component: cytoplasm (GO:0005737);; Cellular Component: plasma membrane (GO:0005886);; Biological Process: protein phosphorylation (GO:0006468);; Biological Process: signal transduction (GO:0007165);; Biological Proc…	--	CBL-interacting serine/threonine-protein kinase 9 OS=Arabidopsis thaliana GN=CIPK9 PE=1 SV=2	CBL-interacting protein kinase 9 [Theobroma cacao]
c33600.graph_c0	14.5734	6.99005	6.85452e-05	-1.11836	down	Posttranslational modification, protein turnover, chaperones	Molecular Function: glutathione transferase activity (GO:0004364);; Biological Process: toxin catabolic process (GO:0009407);; Cellular Component: chloroplast stroma (GO:0009570);; Biological Process: response to cyclopentenone (GO:0010583);; Biological Process: protein glutathionylation (GO:0010731);; Biological Process: response to cadmium ion (GO:0046686);;	K00799|1e-126|vvi:100267329|hypothetical protein LOC100267329	Protein IN2-1 homolog B OS=Oryza sativa subsp. japonica GN=GSTZ5 PE=2 SV=1	PREDICTED: protein IN2-1 homolog B-like [Solanum lycopersicum]
c41120.graph_c0	55.5028	17.0561	0	-1.7661	down	Carbohydrate transport and metabolism	Molecular Function: protein histidine kinase activity (GO:0004673);; Molecular Function: ATP binding (GO:0005524);; Cellular Component: mitochondrion (GO:0005739);; Biological Process: starch catabolic process (GO:0005983);; Biological Process: circadian rhythm (GO:0007623);; Cellular Component: chloroplast stroma (GO:0009570);; Biological Process: response to symbiotic fungus (GO:0009610);; Biol…	--	Alpha-glucan water dikinase, chloroplastic OS=Solanum tuberosum GN=R1 PE=1 SV=2	alpha-glucan water dikinase [Solanum tuberosum]
c31591.graph_c0	31.3436	15.6276	2.06138e-06	-1.06791	down	--	--	--	TPR and ankyrin repeat-containing protein 1 OS=Homo sapiens GN=TRANK1 PE=2 SV=4	PREDICTED: uncharacterized protein LOC100802419 [Glycine max]
c17793.graph_c0	16.7473	6.60465	2.38834e-07	-1.39729	down	--	Biological Process: regulation of transcription, DNA-templated (GO:0006355);; Biological Process: chloroplast organization (GO:0009658);; Cellular Component: chloroplast nucleoid (GO:0042644);;	--	--	PREDICTED: uncharacterized protein LOC101244147 [Solanum lycopersicum]
c37853.graph_c0	13.8561	6.34015	5.39571e-07	-1.18926	down	--	--	--	--	hypothetical protein M569_05764, partial [Genlisea aurea]
c33495.graph_c0	11.8926	5.86797	0.000270923	-1.07713	down	--	Biological Process: maltose metabolic process (GO:0000023);; Cellular Component: chloroplast thylakoid membrane (GO:0009535);; Biological Process: thylakoid membrane organization (GO:0010027);; Biological Process: mRNA modification (GO:0016556);; Biological Process: starch biosynthetic process (GO:0019252);;	--	--	predicted protein [Populus trichocarpa]
c27515.graph_c1	28.071	11.0567	7.38141e-07	-1.39753	down	--	Biological Process: maltose metabolic process (GO:0000023);; Molecular Function: serine-type endopeptidase activity (GO:0004252);; Biological Process: proteolysis (GO:0006508);; Cellular Component: chloroplast thylakoid (GO:0009534);; Cellular Component: chloroplastic endopeptidase Clp complex (GO:0009840);; Cellular Component: chloroplast envelope (GO:0009941);; Biological Process: starch biosyn…	--	ATP-dependent Clp protease proteolytic subunit 5, chloroplastic OS=Arabidopsis thaliana GN=CLPP5 PE=1 SV=1	predicted protein [Populus trichocarpa]
c34469.graph_c0	7.16099	3.311	1.06721e-05	-1.17172	down	Function unknown	Biological Process: response to molecule of bacterial origin (GO:0002237);; Molecular Function: protein serine/threonine kinase activity (GO:0004674);; Molecular Function: transmembrane receptor protein tyrosine kinase activity (GO:0004714);; Molecular Function: ATP binding (GO:0005524);; Cellular Component: plasma membrane (GO:0005886);; Biological Process: N-terminal protein myristoylation (GO:…	--	Receptor-like protein kinase HAIKU2 OS=Arabidopsis thaliana GN=IKU2 PE=1 SV=1	Receptor protein kinase CLAVATA1 precursor, putative [Ricinus communis]
c42010.graph_c0	16.0348	7.36208	1.56726e-05	-1.18103	down	--	--	--	UPF0553 protein OS=Dictyostelium discoideum GN=DDB_G0288723 PE=3 SV=1	PREDICTED: UPF0553 protein-like [Solanum lycopersicum]
c31318.graph_c0	3.52573	0.915005	4.29961e-06	-1.95162	down	--	Cellular Component: chloroplast (GO:0009507);; Biological Process: chloroplast RNA processing (GO:0031425);;	--	Pentatricopeptide repeat-containing protein At1g08070 OS=Arabidopsis thaliana GN=PCMP-H12 PE=2 SV=1	PREDICTED: pentatricopeptide repeat-containing protein At1g08070-like [Vitis vinifera]
c16913.graph_c0	3.14287	1.05731	0.00678083	-1.57582	down	--	Cellular Component: plasma membrane (GO:0005886);; Biological Process: carbohydrate transport (GO:0008643);; Cellular Component: integral component of membrane (GO:0016021);; Molecular Function: sugar transmembrane transporter activity (GO:0051119);;	--	Bidirectional sugar transporter SWEET14 OS=Oryza sativa subsp. indica GN=SWEET14 PE=2 SV=1	PREDICTED: bidirectional sugar transporter SWEET11-like [Solanum lycopersicum]
c36629.graph_c0	22.6446	10.0197	2.38614e-08	-1.23879	down	--	Molecular Function: nucleic acid binding (GO:0003676);; Molecular Function: exonuclease activity (GO:0004527);; Cellular Component: mitochondrion (GO:0005739);; Biological Process: pyrimidine ribonucleotide biosynthetic process (GO:0009220);;	--	Uncharacterized exonuclease domain-containing protein At3g15140 OS=Arabidopsis thaliana GN=At3g15140 PE=2 SV=1	PREDICTED: uncharacterized exonuclease domain-containing protein At3g15140-like [Solanum lycopersicum]
c31488.graph_c0	27.4425	10.5542	4.87856e-11	-1.43987	down	Inorganic ion transport and metabolism	Molecular Function: actin binding (GO:0003779);; Biological Process: cytoskeleton organization (GO:0007010);; Molecular Function: ammonium transmembrane transporter activity (GO:0008519);; Biological Process: myo-inositol hexakisphosphate biosynthetic process (GO:0010264);; Biological Process: methylammonium transport (GO:0015843);; Cellular Component: integral component of membrane (GO:0016021);…	--	Ammonium transporter 1 member 3 OS=Solanum lycopersicum GN=AMT1-3 PE=2 SV=1	ammonium transporter 1 member 3 [Solanum lycopersicum]
c41871.graph_c0	23.8754	10.2069	7.41026e-08	-1.28612	down	--	Cellular Component: mitochondrion (GO:0005739);; Cellular Component: chloroplast (GO:0009507);; Biological Process: embryo development ending in seed dormancy (GO:0009793);; Biological Process: thylakoid membrane organization (GO:0010027);; Biological Process: stomatal complex morphogenesis (GO:0010103);; Biological Process: vegetative to reproductive phase transition of meristem (GO:0010228);; B…	--	--	Mitochondrial transcription termination factor family protein [Theobroma cacao]
c34335.graph_c0	29.5399	12.3251	1.00157e-08	-1.32181	down	--	Cellular Component: mitochondrion (GO:0005739);; Molecular Function: methyltransferase activity (GO:0008168);; Cellular Component: chloroplast (GO:0009507);; Biological Process: methylation (GO:0032259);;	--	--	S-adenosyl-L-methionine-dependent methyltransferases superfamily protein [Theobroma cacao]
c36108.graph_c0	8.54689	1.3988	3.893e-12	-2.60022	down	--	--	--	Pathogen-related protein OS=Hordeum vulgare PE=2 SV=2	Pathogen-related protein [Theobroma cacao]
c37733.graph_c0	7.16904	3.21715	0.000389844	-1.20737	down	Secondary metabolites biosynthesis, transport and catabolism	Molecular Function: monooxygenase activity (GO:0004497);; Molecular Function: iron ion binding (GO:0005506);; Molecular Function: electron carrier activity (GO:0009055);; Molecular Function: oxidoreductase activity, acting on paired donors, with incorporation or reduction of molecular oxygen (GO:0016705);; Molecular Function: heme binding (GO:0020037);; Biological Process: oxidation-reduction pro…	--	Geraniol 8-hydroxylase OS=Catharanthus roseus GN=CYP76B6 PE=1 SV=1	cytochrome P450 monooxygenase isoform I [Sesamum indicum]
c33688.graph_c0	140.061	43.9127	0	-1.73522	down	--	--	--	Putative cell wall protein OS=Arabidopsis thaliana GN=At2g20870 PE=2 SV=2	PREDICTED: putative cell wall protein-like [Solanum lycopersicum]
c15047.graph_c0	11.4442	4.57877	0.00416025	-1.35445	down	General function prediction only	Cellular Component: vacuole (GO:0005773);; Cellular Component: plasma membrane (GO:0005886);; Cellular Component: plasmodesma (GO:0009506);; Biological Process: response to auxin (GO:0009733);; Molecular Function: FMN binding (GO:0010181);; Biological Process: negative regulation of transcription, DNA-templated (GO:0045892);; Molecular Function: 2-hydroxy-1,4-benzoquinone reductase activity (GO:0…	--	NAD(P)H dehydrogenase (quinone) OS=Salmonella typhi GN=STY1155 PE=3 SV=3	PREDICTED: flavoprotein WrbA-like [Solanum lycopersicum]
c23779.graph_c0	10.7024	4.9324	9.15142e-05	-1.17334	down	--	--	--	F-box protein At5g07610 OS=Arabidopsis thaliana GN=At5g07610 PE=2 SV=1	PREDICTED: F-box protein At5g07610 [Vitis vinifera]
c40433.graph_c0	312.957	158.047	5.44638e-06	-1.05013	down	Carbohydrate transport and metabolism	Molecular Function: transketolase activity (GO:0004802);; Biological Process: metabolic process (GO:0008152);; Cellular Component: plastid (GO:0009536);;	K00615|0.0|rcu:RCOM_1611360|transketolase, putative (EC:2.2.1.1)	Transketolase, chloroplastic OS=Solanum tuberosum PE=2 SV=1	hypothetical protein PRUPE_ppa001865mg [Prunus persica]
c33919.graph_c0	58.3819	30.3904	1.63008e-05	-1.00567	down	--	Biological Process: maltose metabolic process (GO:0000023);; Molecular Function: maltose transmembrane transporter activity (GO:0005363);; Biological Process: starch catabolic process (GO:0005983);; Biological Process: pentose-phosphate shunt (GO:0006098);; Biological Process: cell communication (GO:0007154);; Biological Process: multicellular organismal development (GO:0007275);; Biological Proc…	--	Maltose excess protein 1-like, chloroplastic OS=Oryza sativa subsp. japonica GN=Os04g0602400 PE=2 SV=2	PREDICTED: maltose excess protein 1, chloroplastic-like isoform 1 [Solanum lycopersicum]
c40261.graph_c0	248.201	49.7856	0	-2.38163	down	General function prediction only	Molecular Function: catalytic activity (GO:0003824);; Cellular Component: nucleus (GO:0005634);; Cellular Component: cytosol (GO:0005829);; Biological Process: ion transport (GO:0006811);; Biological Process: response to hormone (GO:0009725);; Biological Process: cellular process (GO:0009987);; Biological Process: response to oxygen-containing compound (GO:1901700);;	--	Probable cytokinin riboside 5&apos;-monophosphate phosphoribohydrolase LOGL10 OS=Oryza sativa subsp. japonica GN=LOGL10 PE=2 SV=1	PREDICTED: cytokinin riboside 5&apos;-monophosphate phosphoribohydrolase LOG1-like [Solanum lycopersicum]
c18901.graph_c0	35.014	12.3052	8.21415e-06	-1.54881	down	Carbohydrate transport and metabolism	Biological Process: alkaloid biosynthetic process (GO:0009821);; Molecular Function: raucaffricine beta-glucosidase activity (GO:0050247);; Molecular Function: vomilenine glucosyltransferase activity (GO:0050506);;	--	Strictosidine-O-beta-D-glucosidase OS=Rauvolfia serpentina GN=SGR1 PE=1 SV=1	putative GH1 familly glucosidase [Ipomoea nil]
c42097.graph_c0	23.0081	1.84293	0	-3.59201	down	--	Cellular Component: photosynthetic membrane (GO:0034357);;	--	--	hypothetical protein PRUPE_ppa013406mg [Prunus persica]
c33597.graph_c0	372.755	36.9714	0	-3.39564	down	--	Cellular Component: cell wall (GO:0005618);; Biological Process: auxin-activated signaling pathway (GO:0009734);; Molecular Function: manganese ion binding (GO:0030145);; Molecular Function: nutrient reservoir activity (GO:0045735);; Cellular Component: apoplast (GO:0048046);;	--	Auxin-binding protein ABP19a OS=Prunus persica GN=ABP19A PE=3 SV=1	PREDICTED: auxin-binding protein ABP19a-like [Fragaria vesca subsp. vesca]
c30713.graph_c0	297.87	139.309	7.05369e-08	-1.16078	down	Carbohydrate transport and metabolism	Biological Process: maltose metabolic process (GO:0000023);; Biological Process: MAPK cascade (GO:0000165);; Biological Process: sucrose biosynthetic process (GO:0005986);; Biological Process: pentose-phosphate shunt (GO:0006098);; Biological Process: rRNA processing (GO:0006364);; Biological Process: protein targeting to membrane (GO:0006612);; Biological Process: response to cold (GO:0009409);;…	K01100|0.0|vvi:100260169|hypothetical protein LOC100260169	Sedoheptulose-1,7-bisphosphatase, chloroplastic OS=Spinacia oleracea PE=2 SV=1	chloroplast sedoheptulose-1,7-bisphosphatase [Solanum lycopersicum]
c41420.graph_c0	41.6527	17.7169	1.23187e-09	-1.29631	down	--	Cellular Component: extracellular region (GO:0005576);;	--	Protein ROOT PRIMORDIUM DEFECTIVE 1 OS=Arabidopsis thaliana GN=RPD1 PE=1 SV=1	PREDICTED: uncharacterized protein LOC100248200 [Vitis vinifera]
c39917.graph_c0	10.7739	3.19722	1.67033e-12	-1.80421	down	--	Biological Process: response to light stimulus (GO:0009416);; Biological Process: response to hormone (GO:0009725);; Biological Process: post-embryonic development (GO:0009791);; Biological Process: single-organism cellular process (GO:0044763);; Biological Process: single-organism developmental process (GO:0044767);; Biological Process: reproductive structure development (GO:0048608);; Biologica…	--	Protein EARLY FLOWERING 3 OS=Arabidopsis thaliana GN=ELF3 PE=1 SV=1	conserved hypothetical protein [Ricinus communis]
c19599.graph_c0	24.6716	11.3023	2.57033e-07	-1.18823	down	General function prediction only	Cellular Component: mitochondrion (GO:0005739);; Cellular Component: chloroplast (GO:0009507);;	--	--	PREDICTED: uncharacterized protein LOC100241002 [Vitis vinifera]
c37364.graph_c0	22.0003	9.00372	2.21096e-09	-1.35003	down	Transcription	Molecular Function: plastid sigma factor activity (GO:0001053);; Molecular Function: protein binding (GO:0005515);; Biological Process: DNA-templated transcription, initiation (GO:0006352);; Cellular Component: chloroplast (GO:0009507);; Biological Process: chloroplast relocation (GO:0009902);; Biological Process: leaf morphogenesis (GO:0009965);; Biological Process: thylakoid membrane organizati…	--	RNA polymerase sigma factor sigF, chloroplastic OS=Arabidopsis thaliana GN=SIGF PE=1 SV=1	unnamed protein product [Vitis vinifera]
c32665.graph_c1	14.4199	2.9195	5.66258e-09	-2.29986	down	--	Molecular Function: sequence-specific DNA binding transcription factor activity (GO:0003700);; Cellular Component: nucleus (GO:0005634);; Biological Process: regulation of transcription, DNA-templated (GO:0006355);; Biological Process: detection of ethylene stimulus (GO:0009727);; Molecular Function: sequence-specific DNA binding (GO:0043565);; Biological Process: cellular response to ethylene st…	--	Homeobox protein knotted-1-like 13 OS=Oryza sativa subsp. japonica GN=OSH45 PE=2 SV=2	OSH45 [Oryza sativa Japonica Group]
c37807.graph_c1	4.84686	1.50944	6.88716e-07	-1.7178	down	--	Molecular Function: endonuclease activity (GO:0004519);; Cellular Component: mitochondrion (GO:0005739);; Cellular Component: chloroplast (GO:0009507);; Biological Process: mRNA modification (GO:0016556);;	--	Pentatricopeptide repeat-containing protein At1g11290 OS=Arabidopsis thaliana GN=PCMP-H40 PE=2 SV=1	hypothetical protein PRUPE_ppa001444mg [Prunus persica]
c35516.graph_c0	6.66924	0.929863	0	-2.86928	down	Posttranslational modification, protein turnover, chaperones	Molecular Function: serine-type endopeptidase activity (GO:0004252);; Cellular Component: cell wall (GO:0005618);; Biological Process: proteolysis (GO:0006508);; Cellular Component: extracellular matrix (GO:0031012);; Molecular Function: identical protein binding (GO:0042802);; Biological Process: negative regulation of catalytic activity (GO:0043086);; Cellular Component: apoplast (GO:0048046);;	--	Subtilisin-like protease OS=Arabidopsis thaliana GN=ARA12 PE=1 SV=1	predicted protein [Populus trichocarpa]
c38429.graph_c0	9.70212	1.76292	0	-2.4905	down	--	Cellular Component: extracellular region (GO:0005576);; Biological Process: lipid metabolic process (GO:0006629);; Biological Process: stomatal complex morphogenesis (GO:0010103);;	--	GDSL esterase/lipase At1g33811 OS=Arabidopsis thaliana GN=At1g33811 PE=2 SV=1	PREDICTED: GDSL esterase/lipase At1g33811 [Vitis vinifera]
c18531.graph_c0	43.9156	13.6121	1.11022e-16	-1.75034	down	--	Biological Process: cellular process (GO:0009987);; Biological Process: developmental process (GO:0032502);; Biological Process: single-organism process (GO:0044699);; Biological Process: regulation of biological process (GO:0050789);;	--	Transcription factor TCP2 OS=Arabidopsis thaliana GN=TCP2 PE=2 SV=1	hypothetical protein M569_04302, partial [Genlisea aurea]
c25212.graph_c0	129.79	61.8853	4.00179e-07	-1.13178	down	--	Molecular Function: structural constituent of ribosome (GO:0003735);; Cellular Component: ribosome (GO:0005840);; Biological Process: translation (GO:0006412);; Cellular Component: chloroplast (GO:0009507);; Molecular Function: rRNA binding (GO:0019843);;	--	50S ribosomal protein 6, chloroplastic OS=Spinacia oleracea GN=PSRP6 PE=1 SV=1	RecName: Full=50S ribosomal protein 6, chloroplastic; AltName: Full=CL25; AltName: Full=Plastid-specific 50S ribosomal protein 6; Short=PSRP-6; Flags: Precursor
c18814.graph_c0	35.9681	13.164	2.78182e-11	-1.50977	down	Posttranslational modification, protein turnover, chaperones	Biological Process: protein peptidyl-prolyl isomerization (GO:0000413);; Molecular Function: peptidyl-prolyl cis-trans isomerase activity (GO:0003755);; Molecular Function: dolichyl-diphosphooligosaccharide-protein glycotransferase activity (GO:0004579);; Molecular Function: FK506 binding (GO:0005528);; Cellular Component: endoplasmic reticulum (GO:0005783);; Biological Process: protein folding (…	--	Peptidyl-prolyl cis-trans isomerase FKBP18, chloroplastic OS=Arabidopsis thaliana GN=FKBP18 PE=1 SV=2	FKBP-like peptidyl-prolyl cis-trans isomerase family protein isoform 1 [Theobroma cacao]
c14306.graph_c0	82.4526	34.7835	1.3834e-09	-1.30778	down	--	Cellular Component: chloroplast thylakoid membrane (GO:0009535);; Biological Process: single-organism process (GO:0044699);;	--	--	PREDICTED: uncharacterized protein LOC101245045 [Solanum lycopersicum]
c31179.graph_c0	202.97	87.2629	5.66188e-10	-1.28208	down	Coenzyme transport and metabolism	Biological Process: pentose-phosphate shunt (GO:0006098);; Biological Process: rRNA processing (GO:0006364);; Biological Process: protoporphyrinogen IX biosynthetic process (GO:0006782);; Molecular Function: transaminase activity (GO:0008483);; Biological Process: aromatic amino acid family biosynthetic process (GO:0009073);; Biological Process: response to light stimulus (GO:0009416);; Cellular …	K01845|0.0|vvi:100250737|hypothetical protein LOC100250737	Glutamate-1-semialdehyde 2,1-aminomutase, chloroplastic OS=Brassica napus GN=GSA PE=2 SV=1	glutamate-1-semialdehyde 2,1-aminomutase, putative [Ricinus communis]
c36892.graph_c0	18.965	6.50383	1.36217e-09	-1.5969	down	General function prediction only	Cellular Component: nucleus (GO:0005634);; Cellular Component: cytosol (GO:0005829);; Molecular Function: hydrolase activity (GO:0016787);; Molecular Function: lyase activity (GO:0016829);;	K06966|1e-139|rcu:RCOM_1597390|carboxy-lyase, putative	Cytokinin riboside 5&apos;-monophosphate phosphoribohydrolase LOG3 OS=Arabidopsis thaliana GN=LOG3 PE=1 SV=1	cytokinin riboside 5&apos;-monophosphate phosphoribohydrolase [Petunia x hybrida]
c36288.graph_c0	10.8926	5.15316	0.00429908	-1.12941	down	General function prediction only	Biological Process: metabolic process (GO:0008152);; Cellular Component: chloroplast (GO:0009507);; Molecular Function: hydrolase activity (GO:0016787);;	--	Phosphoglycolate phosphatase 1 OS=Pseudomonas aeruginosa (strain ATCC 15692 / PAO1 / 1C / PRS 101 / LMG 12228) GN=gph1 PE=3 SV=1	unnamed protein product [Vitis vinifera]
c31447.graph_c0	2.02925	0.119013	2.96509e-11	-3.76301	down	Coenzyme transport and metabolism	Molecular Function: GTP cyclohydrolase II activity (GO:0003935);; Molecular Function: GTP binding (GO:0005525);; Molecular Function: 3,4-dihydroxy-2-butanone-4-phosphate synthase activity (GO:0008686);; Biological Process: riboflavin biosynthetic process (GO:0009231);; Cellular Component: chloroplast (GO:0009507);; Biological Process: mRNA modification (GO:0016556);; Molecular Function: metal ion…	K14652|0.0|vvi:100267389|hypothetical protein LOC100267389	Monofunctional riboflavin biosynthesis protein RIBA 3, chloroplastic OS=Arabidopsis thaliana GN=RIBA3 PE=1 SV=1	DHBP synthase RibB-like alpha/beta domain,GTP cyclohydrolase II [Theobroma cacao]
c40275.graph_c0	3.84137	1.98548	0.00052734	-1.01162	down	--	--	--	Putative ribonuclease H protein At1g65750 OS=Arabidopsis thaliana GN=At1g65750 PE=3 SV=1	Uncharacterized protein TCM_011923 [Theobroma cacao]
c34836.graph_c0	63.9196	0.744715	0	-6.40983	down	Secondary metabolites biosynthesis, transport and catabolism	Molecular Function: monooxygenase activity (GO:0004497);; Molecular Function: oxidoreductase activity, acting on paired donors, with incorporation or reduction of molecular oxygen (GO:0016705);; Molecular Function: metal ion binding (GO:0046872);;	--	Cytochrome P450 76A2 OS=Solanum melongena GN=CYP76A2 PE=2 SV=1	PREDICTED: cytochrome P450 76A2 [Vitis vinifera]
c24518.graph_c0	1.66695	0.232586	0.000690024	-2.61156	down	--	Cellular Component: protein phosphatase type 2A complex (GO:0000159);; Biological Process: protein targeting (GO:0006605);; Biological Process: signal transduction (GO:0007165);; Molecular Function: protein phosphatase type 2A regulator activity (GO:0008601);; Cellular Component: membrane (GO:0016020);;	--	Serine/threonine protein phosphatase 2A 57 kDa regulatory subunit B&apos; beta isoform OS=Arabidopsis thaliana GN=B&apos;BETA PE=1 SV=1	Serine/threonine protein phosphatase 2A 57 kDa regulatory subunit B&apos; beta isoform 1 [Theobroma cacao]
c29349.graph_c0	19.6702	8.31543	4.02878e-08	-1.30233	down	--	Biological Process: pentose-phosphate shunt (GO:0006098);; Cellular Component: chloroplast thylakoid (GO:0009534);; Cellular Component: membrane (GO:0016020);;	--	--	PREDICTED: uncharacterized protein LOC100264638 [Vitis vinifera]
c43613.graph_c0	4.2405	0	3.29277e-09	-5.05103	down	--	Molecular Function: nucleotide binding (GO:0000166);; Molecular Function: alcohol dehydrogenase (NAD) activity (GO:0004022);; Cellular Component: Golgi apparatus (GO:0005794);; Cellular Component: cytosol (GO:0005829);; Cellular Component: plasma membrane (GO:0005886);; Cellular Component: plasmodesma (GO:0009506);; Biological Process: para-aminobenzoic acid metabolic process (GO:0046482);; Molec…	--	Cinnamoyl-CoA reductase 1 OS=Arabidopsis thaliana GN=CCR1 PE=1 SV=1	alcohol dehydrogenase-like protein, partial [Genlisea aurea]
c31911.graph_c0	23.1445	11.272	1.31719e-05	-1.09894	down	Translation, ribosomal structure and biogenesis	Molecular Function: aminopeptidase activity (GO:0004177);; Cellular Component: mitochondrion (GO:0005739);; Biological Process: proteolysis (GO:0006508);; Molecular Function: metalloexopeptidase activity (GO:0008235);; Cellular Component: chloroplast (GO:0009507);; Biological Process: response to abscisic acid (GO:0009737);; Biological Process: dolichol biosynthetic process (GO:0019408);; Biologi…	K01265|0.0|vvi:100266473|similar to MAP1D (METHIONINE AMINOPEPTIDASE 1D)	Methionine aminopeptidase 1D, chloroplastic/mitochondrial OS=Arabidopsis thaliana GN=MAP1D PE=2 SV=1	PREDICTED: methionine aminopeptidase 1D, chloroplastic/mitochondrial-like isoform 1 [Fragaria vesca subsp. vesca]
c39803.graph_c0	5.21752	0.619505	0	-3.07862	down	Defense mechanisms	Molecular Function: nucleotide binding (GO:0000166);; Cellular Component: membrane (GO:0016020);; Molecular Function: ATPase activity (GO:0016887);;	--	ABC transporter G family member 22 OS=Arabidopsis thaliana GN=ABCG22 PE=1 SV=1	PREDICTED: ABC transporter G family member 22-like [Vitis vinifera]
c24895.graph_c0	35.4991	17.986	4.7827e-05	-1.04233	down	--	Cellular Component: chloroplast thylakoid membrane (GO:0009535);; Biological Process: mRNA modification (GO:0016556);;	--	--	Uncharacterized protein TCM_000217 [Theobroma cacao]
c13649.graph_c0	5.57585	1.84429	0.000895383	-1.61112	down	--	--	--	--	PREDICTED: uncharacterized protein LOC100268049 [Vitis vinifera]
c15457.graph_c0	3.49211	0.483348	1.18122e-06	-2.72404	down	--	Biological Process: DNA metabolic process (GO:0006259);; Molecular Function: hydrolase activity, acting on acid anhydrides (GO:0016817);; Biological Process: single-organism cellular process (GO:0044763);;	--	--	predicted protein [Populus trichocarpa]
c41530.graph_c0	31.4455	16.1027	0.000285624	-1.02539	down	--	Cellular Component: chloroplast stroma (GO:0009570);;	--	--	conserved hypothetical protein [Ricinus communis]
c34781.graph_c0	12.891	5.57583	1.98431e-06	-1.26651	down	--	Cellular Component: mitochondrion (GO:0005739);;	--	Pentatricopeptide repeat-containing protein At1g01970 OS=Arabidopsis thaliana GN=At1g01970 PE=2 SV=1	PREDICTED: pentatricopeptide repeat-containing protein At1g01970-like [Solanum lycopersicum]
c37215.graph_c1	49.4875	25.509	1.15186e-05	-1.0197	down	--	Biological Process: maltose metabolic process (GO:0000023);; Molecular Function: beta-phosphoglucomutase activity (GO:0008801);; Cellular Component: chloroplast thylakoid (GO:0009534);; Cellular Component: chloroplast stroma (GO:0009570);; Biological Process: photosynthetic electron transport in photosystem I (GO:0009773);; Biological Process: chloroplast relocation (GO:0009902);; Biological Proc…	--	NHL repeat-containing protein 2 OS=Mus musculus GN=Nhlrc2 PE=2 SV=1	PREDICTED: NHL repeat-containing protein 2-like [Vitis vinifera]
c18430.graph_c0	36.1875	14.1108	4.81848e-12	-1.42193	down	--	Biological Process: response to molecule of bacterial origin (GO:0002237);; Molecular Function: DNA binding (GO:0003677);; Molecular Function: protein serine/threonine kinase activity (GO:0004674);; Molecular Function: ATP binding (GO:0005524);; Cellular Component: nucleus (GO:0005634);; Cellular Component: mitochondrion (GO:0005739);; Biological Process: protein phosphorylation (GO:0006468);; Bi…	--	Uncharacterized protein DDB_G0271670 OS=Dictyostelium discoideum GN=DDB_G0271670 PE=4 SV=1	PREDICTED: uncharacterized protein LOC101246046 [Solanum lycopersicum]
c37923.graph_c0	3.57533	1.10055	2.16178e-08	-1.7411	down	--	Molecular Function: transferase activity, transferring phosphorus-containing groups (GO:0016772);;	--	Putative serine/threonine-protein kinase receptor OS=Brassica oleracea var. acephala GN=SRK6 PE=2 SV=2	PREDICTED: G-type lectin S-receptor-like serine/threonine-protein kinase At4g27290-like [Solanum lycopersicum]
c14234.graph_c0	61.7516	28.0397	5.33432e-08	-1.20189	down	Carbohydrate transport and metabolism	Molecular Function: ribose-5-phosphate isomerase activity (GO:0004751);; Biological Process: pentose-phosphate shunt, non-oxidative branch (GO:0009052);; Cellular Component: chloroplast (GO:0009507);; Biological Process: mRNA modification (GO:0016556);;	K01807|1e-60|rcu:RCOM_0770820|ribose-5-phosphate isomerase, putative (EC:5.3.1.6)	Ribose-5-phosphate isomerase A OS=Desulfatibacillum alkenivorans (strain AK-01) GN=rpiA PE=3 SV=1	PREDICTED: ribose-5-phosphate isomerase A-like [Solanum lycopersicum]
c33320.graph_c0	1750.97	183.213	0	-3.32095	down	Carbohydrate transport and metabolism	Biological Process: alkaloid biosynthetic process (GO:0009821);; Molecular Function: raucaffricine beta-glucosidase activity (GO:0050247);; Molecular Function: vomilenine glucosyltransferase activity (GO:0050506);;	--	Beta-glucosidase 24 OS=Oryza sativa subsp. japonica GN=BGLU24 PE=2 SV=1	beta-glucosidase [Olea europaea subsp. europaea]
c26457.graph_c0	2.76401	0.356876	3.35967e-09	-2.85868	down	--	--	--	--	PREDICTED: uncharacterized protein LOC101314079 [Fragaria vesca subsp. vesca]
c37143.graph_c0	36.6782	15.5271	1.46758e-08	-1.30119	down	Intracellular trafficking, secretion, and vesicular transport	Molecular Function: protein binding (GO:0005515);; Biological Process: rRNA processing (GO:0006364);; Biological Process: proteolysis (GO:0006508);; Molecular Function: serine-type peptidase activity (GO:0008236);; Cellular Component: plastid envelope (GO:0009526);; Cellular Component: chloroplast thylakoid membrane (GO:0009535);; Biological Process: chloroplast relocation (GO:0009902);; Biologic…	K03100|1e-124|rcu:RCOM_1052540|signal peptidase I, putative (EC:3.4.21.89)	Chloroplast processing peptidase OS=Arabidopsis thaliana GN=PLSP1 PE=2 SV=2	PREDICTED: chloroplast processing peptidase-like [Solanum lycopersicum]
c38941.graph_c1	31.231	0.744566	0	-5.32511	down	--	Molecular Function: magnesium ion binding (GO:0000287);; Molecular Function: sesquiterpene synthase activity (GO:0010334);; Biological Process: farnesyl diphosphate catabolic process (GO:0045339);; Biological Process: beta-caryophyllene biosynthetic process (GO:1901937);;	--	(-)-germacrene D synthase OS=Vitis vinifera GN=VIT_19s0014g04930 PE=1 SV=1	hypothetical protein VITISV_030783 [Vitis vinifera]
c41718.graph_c0	21.0999	10.9518	0.00078856	-1.0052	down	--	Biological Process: regulation of cyclin-dependent protein serine/threonine kinase activity (GO:0000079);; Molecular Function: cyclin-dependent protein serine/threonine kinase activity (GO:0004693);; Cellular Component: nucleus (GO:0005634);; Biological Process: stomatal lineage progression (GO:0010440);; Molecular Function: protein kinase binding (GO:0019901);;	--	Cyclin-U1-1 OS=Arabidopsis thaliana GN=CYCU1-1 PE=1 SV=1	predicted protein [Populus trichocarpa]
c13778.graph_c0	8.4368	1.30718	3.23856e-08	-2.6246	down	--	Cellular Component: endoplasmic reticulum membrane (GO:0005789);; Molecular Function: nitrate reductase (NADH) activity (GO:0009703);; Cellular Component: integral component of membrane (GO:0016021);; Biological Process: sterol biosynthetic process (GO:0016126);; Biological Process: pentacyclic triterpenoid biosynthetic process (GO:0019745);; Molecular Function: heme binding (GO:0020037);; Biolog…	--	Cytochrome b5 OS=Nicotiana tabacum PE=2 SV=1	Cytochrome B5, n4,ATCB5-B,CB5-B [Theobroma cacao]
c29980.graph_c0	89.967	42.4844	4.14537e-07	-1.1453	down	General function prediction only	Cellular Component: chloroplast (GO:0009507);; Cellular Component: plastid chromosome (GO:0009508);;	--	--	PREDICTED: uncharacterized protein LOC101204548 [Cucumis sativus]
c17239.graph_c0	3.28415	0.10927	3.14105e-05	-3.80013	down	--	Molecular Function: inorganic diphosphatase activity (GO:0004427);; Cellular Component: vacuolar membrane (GO:0005774);; Molecular Function: hydrogen-translocating pyrophosphatase activity (GO:0009678);; Biological Process: proton transport (GO:0015992);; Cellular Component: integral component of membrane (GO:0016021);; Cellular Component: cytoplasmic membrane-bounded vesicle (GO:0016023);; Molec…	K01507|1e-82|rcu:RCOM_0003350|Pyrophosphate-energized vacuolar membrane proton pump, putative (EC:1.3.1.74)	Pyrophosphate-energized vacuolar membrane proton pump OS=Vigna radiata var. radiata PE=1 SV=3	PPase [Hevea brasiliensis]
c22755.graph_c0	188.105	59.4662	0	-1.72388	down	General function prediction only	Biological Process: coumarin biosynthetic process (GO:0009805);; Biological Process: lignin biosynthetic process (GO:0009809);; Biological Process: methylation (GO:0032259);; Molecular Function: caffeoyl-CoA O-methyltransferase activity (GO:0042409);; Biological Process: response to cadmium ion (GO:0046686);; Molecular Function: metal ion binding (GO:0046872);;	--	Caffeoyl-CoA O-methyltransferase OS=Populus tremuloides PE=2 SV=1	caffeoyl-CoA-O-methyltransferase [Broussonetia papyrifera]
c37327.graph_c0	5.54433	2.04784	0.000532761	-1.46911	down	Posttranslational modification, protein turnover, chaperones	Molecular Function: electron carrier activity (GO:0009055);; Cellular Component: chloroplast (GO:0009507);; Molecular Function: protein disulfide oxidoreductase activity (GO:0015035);; Biological Process: cell redox homeostasis (GO:0045454);;	--	--	PREDICTED: uncharacterized protein LOC101297355 [Fragaria vesca subsp. vesca]
c14251.graph_c0	74.7147	24.9024	4.88498e-15	-1.64643	down	--	Biological Process: maltose metabolic process (GO:0000023);; Biological Process: pentose-phosphate shunt (GO:0006098);; Biological Process: rRNA processing (GO:0006364);; Cellular Component: chloroplast thylakoid membrane (GO:0009535);; Biological Process: photosynthetic electron transport in photosystem I (GO:0009773);; Biological Process: photorespiration (GO:0009853);; Cellular Component: NAD(…	--	--	PREDICTED: uncharacterized protein LOC100854331 [Vitis vinifera]
c13796.graph_c0	8.02248	0	9.99201e-16	-5.77048	down	--	Molecular Function: binding (GO:0005488);; Biological Process: metabolic process (GO:0008152);;	--	Transcription factor bHLH19 OS=Arabidopsis thaliana GN=BHLH19 PE=2 SV=1	hypothetical protein M569_16384, partial [Genlisea aurea]
c36903.graph_c0	2.45662	0.455389	1.72015e-07	-2.3944	down	--	--	--	Putative zinc finger protein At1g68190 OS=Arabidopsis thaliana GN=At1g68190 PE=2 SV=1	PREDICTED: putative zinc finger protein At1g68190-like [Solanum lycopersicum]
c16419.graph_c0	33.81	16.7377	2.32964e-05	-1.07551	down	--	Cellular Component: chloroplast thylakoid membrane (GO:0009535);;	--	Protein TIC 20-v, chloroplastic OS=Arabidopsis thaliana GN=TIC20-V PE=2 SV=1	Chloroplast [Theobroma cacao]
c14007.graph_c0	31.1737	15.519	9.63408e-06	-1.06855	down	General function prediction only	Cellular Component: mitochondrion (GO:0005739);; Molecular Function: phosphoric diester hydrolase activity (GO:0008081);; Molecular Function: RNA methyltransferase activity (GO:0008173);; Cellular Component: chloroplast (GO:0009507);; Biological Process: tRNA methylation (GO:0030488);; Molecular Function: metal ion binding (GO:0046872);; Molecular Function: iron-sulfur cluster binding (GO:0051536…	K06941|0.0|vvi:100255376|hypothetical protein LOC100255376	Dual-specificity RNA methyltransferase RlmN OS=Geobacter metallireducens (strain GS-15 / ATCC 53774 / DSM 7210) GN=rlmN PE=3 SV=1	unnamed protein product [Vitis vinifera]
c35125.graph_c0	1.82132	0.246184	1.38353e-08	-2.7937	down	--	--	--	Copia protein OS=Drosophila melanogaster GN=GIP PE=1 SV=3	PREDICTED: uncharacterized protein LOC100817175 [Glycine max]
c41250.graph_c0	48.8579	21.8145	4.56364e-08	-1.22563	down	--	Cellular Component: chloroplast (GO:0009507);;	--	--	predicted protein [Populus trichocarpa]
c20915.graph_c0	66.3596	29.0218	9.89585e-05	-1.24546	down	--	--	--	Selenoprotein P OS=Bos taurus GN=SEPP1 PE=2 SV=2	PREDICTED: uncharacterized protein LOC547928 [Glycine max]
c26125.graph_c1	9.32421	3.25394	2.91248e-07	-1.56535	down	General function prediction only	Molecular Function: oxidoreductase activity, acting on paired donors, with incorporation or reduction of molecular oxygen, 2-oxoglutarate as one donor, and incorporation of one atom each of oxygen into both donors (GO:0016706);; Biological Process: single-organism metabolic process (GO:0044710);;	--	Probable 2-oxoglutarate/Fe(II)-dependent dioxygenase OS=Papaver somniferum GN=DIOX2 PE=2 SV=1	PREDICTED: thebaine 6-O-demethylase-like [Solanum lycopersicum]
c18950.graph_c0	45.3521	15.5992	1.13687e-13	-1.60042	down	General function prediction only	Molecular Function: RNA binding (GO:0003723);; Biological Process: rRNA processing (GO:0006364);; Cellular Component: chloroplast stroma (GO:0009570);; Cellular Component: thylakoid (GO:0009579);; Biological Process: chloroplast relocation (GO:0009902);; Biological Process: thylakoid membrane organization (GO:0010027);; Biological Process: photosynthesis (GO:0015979);; Biological Process: chlorop…	--	33 kDa ribonucleoprotein, chloroplastic OS=Nicotiana sylvestris PE=1 SV=1	PREDICTED: 33 kDa ribonucleoprotein, chloroplastic-like [Solanum lycopersicum]
c41683.graph_c0	25.8225	13.3561	8.09266e-05	-1.0129	down	Amino acid transport and metabolism	Molecular Function: cysteine synthase activity (GO:0004124);; Molecular Function: copper ion binding (GO:0005507);; Cellular Component: mitochondrion (GO:0005739);; Biological Process: glycolysis (GO:0006096);; Biological Process: cysteine biosynthetic process from serine (GO:0006535);; Biological Process: water transport (GO:0006833);; Biological Process: hyperosmotic response (GO:0006972);; Bio…	K13034|0.0|vvi:100255091|hypothetical protein LOC100255091	Bifunctional L-3-cyanoalanine synthase/cysteine synthase 1, mitochondrial OS=Solanum tuberosum GN=PCAS-1 PE=1 SV=1	hypothetical protein VITISV_028023 [Vitis vinifera]
c35019.graph_c0	39.8318	18.2072	4.28074e-08	-1.19274	down	--	Molecular Function: nucleic acid binding (GO:0003676);; Molecular Function: RNA helicase activity (GO:0003724);; Molecular Function: ATP binding (GO:0005524);; Cellular Component: mitochondrion (GO:0005739);; Molecular Function: ATP-dependent helicase activity (GO:0008026);; Biological Process: plasmodesma organization (GO:0009663);; Biological Process: embryo development ending in seed dormancy …	--	DEAD-box ATP-dependent RNA helicase 47A OS=Oryza sativa subsp. japonica GN=Os02g0636300 PE=2 SV=1	increased size exclusion limit 1a [Nicotiana benthamiana]
c38448.graph_c0	94.8357	24.4723	0	-2.01778	down	Cell wall/membrane/envelope biogenesis	Biological Process: sucrose metabolic process (GO:0005985);; Biological Process: biosynthetic process (GO:0009058);; Molecular Function: sucrose synthase activity (GO:0016157);;	K00695|0.0|vvi:100249279|hypothetical protein LOC100249279	Sucrose synthase OS=Solanum tuberosum PE=3 SV=1	sucrose synthase 1 [Orobanche ramosa]
c31880.graph_c0	9.19347	2.18223	1.39539e-11	-2.10652	down	Carbohydrate transport and metabolism	Biological Process: carbohydrate metabolic process (GO:0005975);; Molecular Function: beta-glucosidase activity (GO:0008422);;	--	Periplasmic beta-glucosidase OS=Salmonella typhimurium (strain LT2 / SGSC1412 / ATCC 700720) GN=bglX PE=3 SV=2	PREDICTED: lysosomal beta glucosidase-like [Vitis vinifera]
c19911.graph_c1	12.2796	5.83055	0.00376687	-1.12481	down	--	Biological Process: polysaccharide biosynthetic process (GO:0000271);; Biological Process: amino acid transmembrane transport (GO:0003333);; Cellular Component: plasma membrane (GO:0005886);; Biological Process: acetyl-CoA metabolic process (GO:0006084);; Biological Process: auxin-activated signaling pathway (GO:0009734);; Biological Process: multidimensional cell growth (GO:0009825);; Biological…	K13946|5e-95|rcu:RCOM_1031400|amino acid transporter, putative	Auxin transporter-like protein 3 OS=Arabidopsis thaliana GN=LAX3 PE=2 SV=1	amino acid transporter, putative [Ricinus communis]
c36714.graph_c3	48.2329	20.4424	5.61375e-10	-1.30188	down	Translation, ribosomal structure and biogenesis	Biological Process: pentose-phosphate shunt (GO:0006098);; Biological Process: phosphatidylglycerol biosynthetic process (GO:0006655);; Biological Process: aromatic amino acid family biosynthetic process (GO:0009073);; Cellular Component: chloroplast (GO:0009507);; Biological Process: chloroplast relocation (GO:0009902);; Biological Process: thylakoid membrane organization (GO:0010027);; Biologic…	--	30S ribosomal protein S1 OS=Neisseria meningitidis serogroup B (strain MC58) GN=rpsA PE=1 SV=1	PREDICTED: uncharacterized protein LOC100265091 [Vitis vinifera]
c24688.graph_c0	78.3553	18.3438	0	-2.15815	down	Carbohydrate transport and metabolism	Molecular Function: protein binding (GO:0005515);; Molecular Function: glycogen phosphorylase activity (GO:0008184);; Biological Process: response to cold (GO:0009409);; Biological Process: response to water deprivation (GO:0009414);; Cellular Component: amyloplast (GO:0009501);; Cellular Component: chloroplast stroma (GO:0009570);; Biological Process: starch biosynthetic process (GO:0019252);; M…	--	Alpha-1,4 glucan phosphorylase L-2 isozyme, chloroplastic/amyloplastic OS=Solanum tuberosum GN=STP-1 PE=1 SV=1	RecName: Full=Alpha-1,4 glucan phosphorylase L-2 isozyme, chloroplastic/amyloplastic; AltName: Full=Starch phosphorylase L-2; Flags: Precursor
c37228.graph_c0	339.565	149.931	3.21489e-09	-1.24385	down	Carbohydrate transport and metabolism	Molecular Function: phosphoglycerate kinase activity (GO:0004618);; Molecular Function: ATP binding (GO:0005524);; Cellular Component: cell wall (GO:0005618);; Cellular Component: nucleus (GO:0005634);; Cellular Component: mitochondrion (GO:0005739);; Biological Process: glycolysis (GO:0006096);; Biological Process: response to cold (GO:0009409);; Cellular Component: chloroplast stroma (GO:000957…	K00927|0.0|rcu:RCOM_1574580|phosphoglycerate kinase, putative (EC:2.7.2.3)	Phosphoglycerate kinase, chloroplastic OS=Nicotiana tabacum PE=1 SV=1	phosphoglycerate kinase, chloroplastic [Genlisea aurea]
c39354.graph_c0	126.986	51.1348	1.15516e-11	-1.37635	down	Energy production and conversion	Molecular Function: ATP:ADP antiporter activity (GO:0005471);; Molecular Function: ATP binding (GO:0005524);; Biological Process: transport (GO:0006810);; Cellular Component: integral component of membrane (GO:0016021);; Cellular Component: chloroplast membrane (GO:0031969);;	K03301|0.0|vvi:100258352|hypothetical protein LOC100258352	Plastidic ATP/ADP-transporter OS=Solanum tuberosum PE=2 SV=2	PREDICTED: plastidic ATP/ADP-transporter [Vitis vinifera]
c32532.graph_c0	8.39859	3.34777	0.00071504	-1.36638	down	--	--	--	Dirigent protein 9 OS=Arabidopsis thaliana GN=DIR9 PE=2 SV=1	PREDICTED: uncharacterized protein LOC101266211 [Solanum lycopersicum]
c15770.graph_c0	3.8236	0.174089	1.20631e-07	-3.81785	down	--	--	--	Mannose-specific lectin OS=Galanthus nivalis PE=1 SV=1	tuber lectin 1 [Dioscorea polystachya]
c17073.graph_c0	14.1417	6.54229	5.86206e-07	-1.17379	down	Replication, recombination and repair	Molecular Function: nucleotide binding (GO:0000166);; Molecular Function: DNA binding (GO:0003677);; Biological Process: DNA metabolic process (GO:0006259);; Cellular Component: plastid (GO:0009536);;	K07456|0.0|pop:POPTR_1075519|hypothetical protein	MutS2 protein OS=Synechocystis sp. (strain PCC 6803 / Kazusa) GN=mutSB PE=3 SV=1	PREDICTED: mutS2 protein-like [Solanum lycopersicum]
c27210.graph_c1	4.36202	2.14697	0.00204857	-1.07701	down	--	--	--	Putative disease resistance protein At1g59780 OS=Arabidopsis thaliana GN=At1g59780 PE=2 SV=1	Disease resistance protein RPP13, putative [Ricinus communis]
c33743.graph_c0	41.4557	17.7492	1.00133e-07	-1.28376	down	--	Cellular Component: chloroplast thylakoid membrane (GO:0009535);; Biological Process: leaf morphogenesis (GO:0009965);; Biological Process: cell differentiation (GO:0030154);; Biological Process: positive regulation of transcription, DNA-templated (GO:0045893);;	--	--	PREDICTED: uncharacterized protein LOC100248460 [Vitis vinifera]
c36127.graph_c0	51.3923	23.5681	6.76856e-08	-1.18781	down	Posttranslational modification, protein turnover, chaperones	Biological Process: protein peptidyl-prolyl isomerization (GO:0000413);; Molecular Function: peptidyl-prolyl cis-trans isomerase activity (GO:0003755);; Biological Process: protein folding (GO:0006457);; Cellular Component: chloroplast thylakoid membrane (GO:0009535);; Cellular Component: chloroplast thylakoid lumen (GO:0009543);; Biological Process: stomatal complex morphogenesis (GO:0010103);; …	--	Peptidyl-prolyl cis-trans isomerase CYP37, chloroplastic OS=Arabidopsis thaliana GN=CYP37 PE=1 SV=3	PREDICTED: peptidyl-prolyl cis-trans isomerase CYP37, chloroplastic-like [Solanum lycopersicum]
c35259.graph_c0	5.1989	2.06639	0.00632381	-1.36109	down	--	--	--	--	hypothetical protein VITISV_018845 [Vitis vinifera]
c14257.graph_c0	329.605	83.9007	0	-2.0383	down	--	Molecular Function: DNA binding (GO:0003677);; Cellular Component: intracellular (GO:0005622);; Molecular Function: zinc ion binding (GO:0008270);;	--	Zinc finger protein CONSTANS-LIKE 10 OS=Arabidopsis thaliana GN=COL10 PE=1 SV=1	unnamed protein product [Vitis vinifera]
c41364.graph_c0	38.8167	17.4123	1.82907e-08	-1.21978	down	--	--	--	Eukaryotic translation initiation factor 5B OS=Pongo abelii GN=EIF5B PE=2 SV=2	PREDICTED: uncharacterized protein LOC101243687 isoform 2 [Solanum lycopersicum]
c30821.graph_c0	42.9559	17.8435	7.43458e-10	-1.32991	down	Translation, ribosomal structure and biogenesis	Biological Process: translational termination (GO:0006415);; Biological Process: heme biosynthetic process (GO:0006783);; Cellular Component: chloroplast (GO:0009507);; Biological Process: chloroplast relocation (GO:0009902);; Biological Process: thylakoid membrane organization (GO:0010027);; Biological Process: carotenoid biosynthetic process (GO:0016117);; Molecular Function: translation releas…	K02835|1e-176|vvi:100247720|hypothetical protein LOC100247720	Peptide chain release factor 1 OS=Cyanothece sp. (strain PCC 7424) GN=prfA PE=3 SV=1	PREDICTED: peptide chain release factor 1-like [Solanum lycopersicum]
c16684.graph_c1	1.84827	0.456824	0.002256	-1.96487	down	Replication, recombination and repair	Molecular Function: catalytic activity (GO:0003824);; Molecular Function: binding (GO:0005488);; Biological Process: cellular process (GO:0009987);; Biological Process: macromolecule metabolic process (GO:0043170);; Biological Process: primary metabolic process (GO:0044238);;	--	Retrotransposable element Tf2 155 kDa protein type 3 OS=Schizosaccharomyces pombe (strain 972 / ATCC 24843) GN=Tf2-11 PE=4 SV=1	polyprotein [Glycine max]
c42238.graph_c0	13.6404	3.95041	3.59746e-11	-1.83433	down	--	Biological Process: pentose-phosphate shunt (GO:0006098);; Biological Process: rRNA processing (GO:0006364);; Cellular Component: chloroplast thylakoid lumen (GO:0009543);; Biological Process: embryo development ending in seed dormancy (GO:0009793);; Biological Process: thylakoid membrane organization (GO:0010027);; Biological Process: vegetative to reproductive phase transition of meristem (GO:0…	--	Thylakoid lumenal 15.0 kDa protein 2, chloroplastic OS=Arabidopsis thaliana GN=At5g52970 PE=1 SV=2	PREDICTED: thylakoid lumenal 15.0 kDa protein 2, chloroplastic-like [Solanum lycopersicum]
c14364.graph_c1	196.806	94.294	2.6635e-07	-1.12546	down	General function prediction only	Molecular Function: RNA binding (GO:0003723);; Biological Process: phosphate-containing compound metabolic process (GO:0006796);; Biological Process: RNA metabolic process (GO:0016070);; Biological Process: organophosphate metabolic process (GO:0019637);; Biological Process: monocarboxylic acid metabolic process (GO:0032787);; Biological Process: cellular biosynthetic process (GO:0044249);; Biolo…	--	31 kDa ribonucleoprotein, chloroplastic OS=Nicotiana sylvestris PE=1 SV=1	RecName: Full=31 kDa ribonucleoprotein, chloroplastic; Flags: Precursor
c15002.graph_c0	16.1689	7.41047	0.000887889	-1.17669	down	--	Biological Process: maltose metabolic process (GO:0000023);; Cellular Component: chloroplast thylakoid membrane (GO:0009535);; Biological Process: starch biosynthetic process (GO:0019252);;	--	--	PREDICTED: uncharacterized protein LOC101247982 [Solanum lycopersicum]
c20260.graph_c0	2.9887	0.23504	0.00245119	-3.05908	down	--	--	--	Organ-specific protein S2 OS=Pisum sativum PE=2 SV=1	epicotyl-specific tissue protein [Striga asiatica]
c37162.graph_c0	172.71	58.3341	0	-1.63024	down	Coenzyme transport and metabolism	Biological Process: maltose metabolic process (GO:0000023);; Biological Process: pentose-phosphate shunt (GO:0006098);; Biological Process: thiamine biosynthetic process (GO:0009228);; Cellular Component: chloroplast stroma (GO:0009570);; Biological Process: response to vitamin B1 (GO:0010266);; Biological Process: detection of bacterium (GO:0016045);; Biological Process: starch biosynthetic proc…	K03147|0.0|ath:AT2G29630|THIC	Phosphomethylpyrimidine synthase, chloroplastic OS=Arabidopsis thaliana GN=THIC PE=1 SV=1	PREDICTED: phosphomethylpyrimidine synthase, chloroplastic-like [Solanum lycopersicum]
c30262.graph_c0	28.6574	11.6758	1.27432e-09	-1.3567	down	--	Biological Process: aromatic amino acid family biosynthetic process (GO:0009073);; Cellular Component: chloroplast stroma (GO:0009570);; Cellular Component: proplastid stroma (GO:0009571);; Biological Process: photosystem II assembly (GO:0010207);; Biological Process: iron-sulfur cluster assembly (GO:0016226);;	--	--	conserved hypothetical protein [Ricinus communis]
c40603.graph_c0	156.654	42.515	0	-1.94445	down	--	Biological Process: maltose metabolic process (GO:0000023);; Biological Process: pentose-phosphate shunt (GO:0006098);; Cellular Component: chloroplast stroma (GO:0009570);; Biological Process: chloroplast relocation (GO:0009902);; Biological Process: thylakoid membrane organization (GO:0010027);; Biological Process: starch biosynthetic process (GO:0019252);; Biological Process: isopentenyl dipho…	--	--	PREDICTED: uncharacterized protein LOC101492820 [Cicer arietinum]
c31661.graph_c0	12.0111	5.57046	9.99589e-06	-1.16755	down	Amino acid transport and metabolism	Biological Process: transport (GO:0006810);; Cellular Component: membrane (GO:0016020);;	--	Probable peptide/nitrate transporter At1g22540 OS=Arabidopsis thaliana GN=At1g22540 PE=2 SV=1	PREDICTED: probable peptide/nitrate transporter At1g22540-like [Solanum lycopersicum]
c34131.graph_c0	5.89541	2.83634	0.000836906	-1.11017	down	Amino acid transport and metabolism	Molecular Function: transporter activity (GO:0005215);; Cellular Component: plasma membrane (GO:0005886);; Biological Process: oligopeptide transport (GO:0006857);; Cellular Component: integral component of membrane (GO:0016021);;	--	Probable nitrite transporter At1g68570 OS=Arabidopsis thaliana GN=At1g68570 PE=2 SV=1	PREDICTED: probable nitrite transporter At1g68570-like [Solanum lycopersicum]
c16108.graph_c0	28.4299	12.4526	8.07826e-07	-1.24997	down	Signal transduction mechanisms	Biological Process: circadian rhythm (GO:0007623);; Cellular Component: chloroplast inner membrane (GO:0009706);; Cellular Component: integral component of membrane (GO:0016021);;	--	Transmembrane protein DDB_G0269096 OS=Dictyostelium discoideum GN=DDB_G0269096 PE=4 SV=1	PREDICTED: uncharacterized protein LOC101244759 [Solanum lycopersicum]
c40541.graph_c0	187.263	75.3747	1.126e-11	-1.37697	down	--	Molecular Function: protein binding (GO:0005515);; Biological Process: rRNA processing (GO:0006364);; Biological Process: regulation of translation (GO:0006417);; Biological Process: phosphatidylglycerol biosynthetic process (GO:0006655);; Biological Process: G-protein coupled receptor signaling pathway (GO:0007186);; Cellular Component: photosystem II (GO:0009523);; Cellular Component: plastid i…	--	Protein THYLAKOID FORMATION1, chloroplastic OS=Solanum tuberosum GN=THF1 PE=2 SV=1	PREDICTED: protein THYLAKOID FORMATION 1, chloroplastic-like [Cucumis sativus]
c38769.graph_c0	85.1403	35.1763	5.20745e-11	-1.33943	down	Translation, ribosomal structure and biogenesis	Molecular Function: translation initiation factor activity (GO:0003743);; Molecular Function: GTPase activity (GO:0003924);; Molecular Function: GTP binding (GO:0005525);; Biological Process: GTP catabolic process (GO:0006184);; Biological Process: translational initiation (GO:0006413);; Cellular Component: chloroplast stroma (GO:0009570);; Biological Process: chloroplast relocation (GO:0009902);…	K02519|0.0|rcu:RCOM_0477800|mitochondrial translational initiation factor, putative	Translation initiation factor IF-2, chloroplastic OS=Arabidopsis thaliana GN=At1g17220 PE=2 SV=2	PREDICTED: translation initiation factor IF-2, chloroplastic-like [Solanum lycopersicum]
c46502.graph_c0	2.17376	0.0648434	4.41489e-06	-3.9515	down	--	Biological Process: very long-chain fatty acid metabolic process (GO:0000038);; Cellular Component: nucleus (GO:0005634);; Cellular Component: mitochondrion (GO:0005739);; Cellular Component: endoplasmic reticulum (GO:0005783);; Biological Process: lipid biosynthetic process (GO:0008610);; Molecular Function: formate dehydrogenase (NAD+) activity (GO:0008863);; Biological Process: response to col…	K00122|1e-173|vvi:100261093|hypothetical protein LOC100261093	Formate dehydrogenase, mitochondrial OS=Solanum tuberosum GN=FDH1 PE=1 SV=2	Formate dehydrogenase [Theobroma cacao]
c21893.graph_c0	2.50228	0.597146	5.90838e-05	-2.04216	down	Replication, recombination and repair	Molecular Function: catalytic activity (GO:0003824);; Biological Process: cellular process (GO:0009987);; Biological Process: macromolecule metabolic process (GO:0043170);; Biological Process: primary metabolic process (GO:0044238);; Molecular Function: organic cyclic compound binding (GO:0097159);; Molecular Function: heterocyclic compound binding (GO:1901363);;	--	Retrotransposable element Tf2 155 kDa protein type 3 OS=Schizosaccharomyces pombe (strain 972 / ATCC 24843) GN=Tf2-11 PE=4 SV=1	hypothetical protein VITISV_036155 [Vitis vinifera]
c39783.graph_c0	44.0023	19.8219	1.08352e-08	-1.21431	down	--	--	--	--	unnamed protein product [Chondrus crispus]
c14658.graph_c0	8.49868	2.63354	5.41102e-11	-1.7407	down	--	Molecular Function: serine-type carboxypeptidase activity (GO:0004185);; Cellular Component: extracellular region (GO:0005576);; Cellular Component: vacuole (GO:0005773);; Biological Process: proteolysis (GO:0006508);;	K13289|0.0|vvi:100251321|hypothetical protein LOC100251321	Serine carboxypeptidase-like 20 OS=Arabidopsis thaliana GN=SCPL20 PE=2 SV=2	PREDICTED: serine carboxypeptidase-like 20-like [Vitis vinifera]
c27723.graph_c1	6.67997	2.11613	0.000331761	-1.67242	down	--	Molecular Function: iron ion binding (GO:0005506);; Molecular Function: electron carrier activity (GO:0009055);; Molecular Function: alkane 1-monooxygenase activity (GO:0018685);; Molecular Function: heme binding (GO:0020037);; Biological Process: oxidation-reduction process (GO:0055114);; Molecular Function: aromatase activity (GO:0070330);;	--	Cytochrome P450 (Fragment) OS=Helianthus annuus PE=1 SV=1	PREDICTED: cytochrome P450 94A2-like [Glycine max]
c34167.graph_c0	123.928	60.9919	1.02406e-06	-1.08674	down	Translation, ribosomal structure and biogenesis	Cellular Component: plastid large ribosomal subunit (GO:0000311);; Molecular Function: structural constituent of ribosome (GO:0003735);; Cellular Component: nucleus (GO:0005634);; Biological Process: transcription, DNA-templated (GO:0006351);; Biological Process: translation (GO:0006412);; Molecular Function: poly(U) RNA binding (GO:0008266);; Cellular Component: chloroplast thylakoid membrane (G…	K02926|1e-119|vvi:100255256|hypothetical protein LOC100255256	50S ribosomal protein L4, chloroplastic OS=Nicotiana tabacum GN=RPL4 PE=2 SV=1	RecName: Full=50S ribosomal protein L4, chloroplastic; AltName: Full=CL4; AltName: Full=R-protein L4; Flags: Precursor
c27331.graph_c0	31.9607	10.7591	6.61271e-12	-1.62774	down	--	Molecular Function: hydrolase activity (GO:0016787);;	--	GDSL esterase/lipase At5g03980 OS=Arabidopsis thaliana GN=At5g03980 PE=2 SV=1	PREDICTED: acetylajmalan esterase-like isoform 2 [Solanum lycopersicum]
c41687.graph_c0	35.4068	13.6944	1.34517e-11	-1.43275	down	--	Cellular Component: mitochondrion (GO:0005739);; Biological Process: rRNA processing (GO:0006364);; Biological Process: tRNA metabolic process (GO:0006399);; Cellular Component: chloroplast (GO:0009507);; Biological Process: chloroplast organization (GO:0009658);; Biological Process: isopentenyl diphosphate biosynthetic process, methylerythritol 4-phosphate pathway (GO:0019288);; Biological Proce…	--	Pentatricopeptide repeat-containing protein At1g02150 OS=Arabidopsis thaliana GN=At1g02150 PE=2 SV=2	PREDICTED: pentatricopeptide repeat-containing protein At1g02150-like [Solanum lycopersicum]
c31743.graph_c0	23.5797	6.71559	2.22045e-16	-1.86905	down	Carbohydrate transport and metabolism	Biological Process: maltose metabolic process (GO:0000023);; Cellular Component: mitochondrion (GO:0005739);; Cellular Component: cytosol (GO:0005829);; Biological Process: sulfur compound metabolic process (GO:0006790);; Molecular Function: 3'(2'),5'-bisphosphate nucleotidase activity (GO:0008441);; Molecular Function: inositol monophosphate 1-phosphatase activity (GO:0008934);; Cellular Compone…	K01092|0.0|pop:POPTR_586756|inositol monophosphatase family protein	Phosphatase IMPL1, chloroplastic OS=Arabidopsis thaliana GN=IMPL1 PE=1 SV=2	PREDICTED: phosphatase IMPL1, chloroplastic-like isoform 1 [Solanum lycopersicum]
c34791.graph_c2	6.49158	1.99266	0.000729502	-1.7082	down	--	Cellular Component: Golgi apparatus (GO:0005794);; Molecular Function: transferase activity, transferring glycosyl groups (GO:0016757);;	--	--	PREDICTED: uncharacterized protein At1g04910-like [Solanum lycopersicum]
c18068.graph_c0	37.6221	10.3524	1.11022e-16	-1.91691	down	--	Biological Process: maltose metabolic process (GO:0000023);; Cellular Component: chloroplast thylakoid membrane (GO:0009535);; Biological Process: starch biosynthetic process (GO:0019252);; Biological Process: positive regulation of catalytic activity (GO:0043085);;	--	--	PREDICTED: uncharacterized protein LOC101244833 [Solanum lycopersicum]
c35199.graph_c0	19.7709	8.68736	1.15838e-06	-1.24517	down	Signal transduction mechanisms	Molecular Function: phosphoprotein phosphatase activity (GO:0004721);; Biological Process: rRNA processing (GO:0006364);; Cellular Component: chloroplast stroma (GO:0009570);; Biological Process: thylakoid membrane organization (GO:0010027);; Biological Process: regulation of proton transport (GO:0010155);; Biological Process: photosystem II assembly (GO:0010207);; Biological Process: peptidyl-th…	--	Probable protein phosphatase 2C 26 OS=Arabidopsis thaliana GN=At2g30170 PE=2 SV=2	Phosphatase 2C family protein isoform 1 [Theobroma cacao]
c42412.graph_c0	7.76756	2.65921	8.01777e-09	-1.59713	down	--	--	--	Putative UPF0481 protein At3g02645 OS=Arabidopsis thaliana GN=At3g02645 PE=3 SV=1	predicted protein [Populus trichocarpa]
c36599.graph_c0	15.5054	6.28749	5.79935e-09	-1.3622	down	--	Cellular Component: mitochondrion (GO:0005739);; Cellular Component: chloroplast (GO:0009507);; Biological Process: embryo sac development (GO:0009553);; Biological Process: pollen development (GO:0009555);; Biological Process: embryo development ending in seed dormancy (GO:0009793);; Molecular Function: rRNA binding (GO:0019843);; Biological Process: pollen tube development (GO:0048868);;	--	Pentatricopeptide repeat-containing protein At3g06430, chloroplastic OS=Arabidopsis thaliana GN=EMB2750 PE=2 SV=1	PREDICTED: pentatricopeptide repeat-containing protein At3g06430, chloroplastic [Vitis vinifera]
c36563.graph_c0	52.943	21.5218	2.96681e-10	-1.36087	down	--	Biological Process: maltose metabolic process (GO:0000023);; Cellular Component: plasma membrane (GO:0005886);; Biological Process: starch biosynthetic process (GO:0019252);; Biological Process: positive regulation of catalytic activity (GO:0043085);;	K02116|1e-164|rcu:RCOM_0613770|hypothetical protein	ATP synthase protein I OS=Synechococcus sp. (strain ATCC 27144 / PCC 6301 / SAUG 1402/1) GN=atpI PE=3 SV=1	PREDICTED: uncharacterized protein LOC101306834 [Fragaria vesca subsp. vesca]
c30384.graph_c0	1.68339	0	1.2398e-08	-4.97112	down	Cell cycle control, cell division, chromosome partitioning	Cellular Component: intracellular non-membrane-bounded organelle (GO:0043232);; Biological Process: single-organism cellular process (GO:0044763);;	K06669|5e-40|pop:POPTR_804027|CPE903	Structural maintenance of chromosomes protein 3 OS=Arabidopsis thaliana GN=SMC3 PE=2 SV=1	hypothetical protein M569_07108, partial [Genlisea aurea]
c35626.graph_c0	7.63152	3.00083	0.00415712	-1.37735	down	--	Molecular Function: RNA binding (GO:0003723);; Biological Process: regulation of transcription, DNA-templated (GO:0006355);; Biological Process: tRNA metabolic process (GO:0006399);; Molecular Function: rRNA methyltransferase activity (GO:0008649);; Cellular Component: plastid (GO:0009536);; Biological Process: chloroplast organization (GO:0009658);; Biological Process: rRNA methylation (GO:00311…	K03500|7e-23|vvi:100253242|hypothetical protein LOC100253242	--	PREDICTED: ribosomal RNA small subunit methyltransferase B-like [Fragaria vesca subsp. vesca]
c40858.graph_c0	81.64	41.3117	4.12644e-06	-1.04658	down	--	Molecular Function: coproporphyrinogen oxidase activity (GO:0004109);; Biological Process: rRNA processing (GO:0006364);; Biological Process: protoporphyrinogen IX biosynthetic process (GO:0006782);; Biological Process: aromatic amino acid family biosynthetic process (GO:0009073);; Cellular Component: chloroplast stroma (GO:0009570);; Biological Process: leaf morphogenesis (GO:0009965);; Biologic…	K00228|0.0|vvi:100243271|hypothetical protein LOC100243271	Coproporphyrinogen-III oxidase, chloroplastic OS=Glycine max GN=CPX PE=1 SV=1	PREDICTED: coproporphyrinogen-III oxidase, chloroplastic-like [Solanum lycopersicum]
c39532.graph_c0	6.32751	3.18473	0.000438933	-1.04883	down	--	--	--	Pentatricopeptide repeat-containing protein At1g11290 OS=Arabidopsis thaliana GN=PCMP-H40 PE=2 SV=1	PREDICTED: pentatricopeptide repeat-containing protein At4g13650-like [Solanum lycopersicum]
c34454.graph_c0	10.8184	1.78855	0	-2.62372	down	--	Molecular Function: hydrolase activity, acting on ester bonds (GO:0016788);;	--	GDSL esterase/lipase At5g55050 OS=Arabidopsis thaliana GN=At5g55050 PE=2 SV=1	predicted protein [Populus trichocarpa]
c35456.graph_c0	23.5989	7.45176	5.71765e-14	-1.72065	down	General function prediction only	Molecular Function: nucleotide binding (GO:0000166);; Molecular Function: catalytic activity (GO:0003824);; Cellular Component: mitochondrion (GO:0005739);; Biological Process: pentose-phosphate shunt (GO:0006098);; Cellular Component: chloroplast envelope (GO:0009941);; Biological Process: chloroplast fission (GO:0010020);; Biological Process: thylakoid membrane organization (GO:0010027);; Biolo…	K07071|1e-159|pop:POPTR_821134|hypothetical protein	Epimerase family protein slr1223 OS=Synechocystis sp. (strain PCC 6803 / Kazusa) GN=slr1223 PE=3 SV=2	PREDICTED: epimerase family protein slr1223-like [Solanum lycopersicum]
c38110.graph_c1	5.83173	1.21077	6.75741e-05	-2.21041	down	--	--	--	BEL1-like homeodomain protein 4 OS=Arabidopsis thaliana GN=BLH4 PE=2 SV=2	PREDICTED: BEL1-like homeodomain protein 2-like [Solanum lycopersicum]
c21710.graph_c0	36.2866	17.3149	5.1358e-06	-1.12848	down	--	Biological Process: response to stress (GO:0006950);;	--	--	PREDICTED: uncharacterized protein LOC101261709 [Solanum lycopersicum]
c16277.graph_c0	3.01865	0.386867	0.00191241	-2.66675	down	--	Molecular Function: transferase activity (GO:0016740);;	--	Cellulose synthase-like protein E6 OS=Oryza sativa subsp. japonica GN=CSLE6 PE=2 SV=1	Cellulose synthase like G2, putative [Theobroma cacao]
c37976.graph_c1	0.901478	0.435015	0.00310287	-1.10321	down	--	Molecular Function: catalytic activity (GO:0003824);; Biological Process: nucleobase-containing compound metabolic process (GO:0006139);; Molecular Function: organic cyclic compound binding (GO:0097159);; Molecular Function: heterocyclic compound binding (GO:1901363);;	--	Retrovirus-related Pol polyprotein from transposon TNT 1-94 OS=Nicotiana tabacum PE=2 SV=1	hypothetical protein VITISV_031733 [Vitis vinifera]
c36639.graph_c0	27.5322	0.812442	0	-5.05098	down	--	Molecular Function: sulfotransferase activity (GO:0008146);;	--	Cytosolic sulfotransferase 15 OS=Arabidopsis thaliana GN=SOT15 PE=1 SV=1	Flavonol 3-sulfotransferase, putative [Ricinus communis]
c25135.graph_c0	5.78953	0.848876	1.47174e-07	-2.67844	down	--	Molecular Function: protein binding (GO:0005515);; Cellular Component: endosome (GO:0005768);; Cellular Component: Golgi apparatus (GO:0005794);; Cellular Component: trans-Golgi network (GO:0005802);; Biological Process: response to mechanical stimulus (GO:0009612);; Biological Process: xyloglucan biosynthetic process (GO:0009969);; Biological Process: response to chitin (GO:0010200);; Cellular C…	K08238|3e-68|ath:AT3G62720|XT1	Xyloglucan 6-xylosyltransferase OS=Arabidopsis thaliana GN=XT1 PE=1 SV=1	putative xylosyl transferase [Coffea canephora]
c23950.graph_c0	21.331	11.0629	3.74812e-05	-1.00992	down	--	Molecular Function: ribonuclease P activity (GO:0004526);; Cellular Component: mitochondrion (GO:0005739);; Biological Process: tRNA processing (GO:0008033);; Cellular Component: chloroplast (GO:0009507);; Molecular Function: transmembrane transporter activity (GO:0022857);; Biological Process: transmembrane transport (GO:0055085);;	--	Proteinaceous RNase P 1, chloroplastic/mitochondrial OS=Arabidopsis thaliana GN=PRORP1 PE=1 SV=1	PREDICTED: proteinaceous RNase P 1, chloroplastic/mitochondrial-like [Solanum lycopersicum]
c24325.graph_c0	257.795	122.951	1.85521e-07	-1.13229	down	Translation, ribosomal structure and biogenesis	Cellular Component: chloroplast thylakoid (GO:0009534);; Cellular Component: chloroplast stroma (GO:0009570);; Cellular Component: ribonucleoprotein complex (GO:0030529);;	--	30S ribosomal protein S21, chloroplastic (Fragment) OS=Spinacia oleracea GN=rps21 PE=1 SV=1	PREDICTED: uncharacterized protein LOC101248838 [Solanum lycopersicum]
c27641.graph_c0	49.7046	24.9503	3.13374e-06	-1.05804	down	Transcription	Molecular Function: plastid sigma factor activity (GO:0001053);; Molecular Function: DNA binding (GO:0003677);; Molecular Function: sequence-specific DNA binding transcription factor activity (GO:0003700);; Molecular Function: DNA-directed RNA polymerase activity (GO:0003899);; Molecular Function: protein binding (GO:0005515);; Biological Process: pentose-phosphate shunt (GO:0006098);; Biological…	--	RNA polymerase sigma factor sigB OS=Arabidopsis thaliana GN=SIGB PE=2 SV=2	PREDICTED: RNA polymerase sigma factor sigB-like [Solanum lycopersicum]
c35337.graph_c0	57.2102	28.1321	1.69457e-06	-1.08739	down	Intracellular trafficking, secretion, and vesicular transport	Biological Process: maltose metabolic process (GO:0000023);; Biological Process: rRNA processing (GO:0006364);; Biological Process: protein secretion (GO:0009306);; Cellular Component: chloroplast thylakoid membrane (GO:0009535);; Biological Process: double fertilization forming a zygote and endosperm (GO:0009567);; Biological Process: abscisic acid biosynthetic process (GO:0009688);; Biological …	K03118|1e-152|rcu:RCOM_0275600|Sec-independent protein translocase protein tatC, putative	Sec-independent protein translocase protein TATC, chloroplastic OS=Pisum sativum GN=TATC PE=1 SV=1	hypothetical protein M569_02709, partial [Genlisea aurea]
c22930.graph_c0	3.22428	1.10749	0.00151122	-1.55932	down	--	--	--	Protein NLP9 OS=Arabidopsis thaliana GN=NLP9 PE=2 SV=1	PREDICTED: protein NLP8-like [Solanum lycopersicum]
c26958.graph_c0	7.69052	2.7585	0.000636695	-1.50709	down	Posttranslational modification, protein turnover, chaperones	Cellular Component: nucleus (GO:0005634);; Cellular Component: cytoplasm (GO:0005737);; Molecular Function: electron carrier activity (GO:0009055);; Molecular Function: protein disulfide oxidoreductase activity (GO:0015035);; Biological Process: cell redox homeostasis (GO:0045454);; Biological Process: stamen morphogenesis (GO:0048448);; Biological Process: petal formation (GO:0048451);; Biologic…	--	Glutaredoxin-C3 OS=Oryza sativa subsp. japonica GN=GRXC3 PE=2 SV=1	Thioredoxin superfamily protein [Theobroma cacao]
c21174.graph_c1	280.488	90.4048	0	-1.69703	down	Carbohydrate transport and metabolism	Molecular Function: fructose-bisphosphate aldolase activity (GO:0004332);; Cellular Component: mitochondrion (GO:0005739);; Biological Process: glycolysis (GO:0006096);; Biological Process: response to abscisic acid (GO:0009737);; Cellular Component: chloroplast envelope (GO:0009941);; Cellular Component: plastoglobule (GO:0010287);; Cellular Component: membrane (GO:0016020);; Cellular Component:…	K01623|1e-120|vvi:100262354|hypothetical protein LOC100262354	Fructose-bisphosphate aldolase, chloroplastic OS=Oryza sativa subsp. japonica GN=Os11g0171300 PE=1 SV=2	unnamed protein product [Vitis vinifera]
c26606.graph_c0	7.99839	2.53915	1.55871e-09	-1.7032	down	Function unknown	Biological Process: response to molecule of bacterial origin (GO:0002237);; Molecular Function: receptor activity (GO:0004872);; Molecular Function: protein binding (GO:0005515);; Cellular Component: mitochondrion (GO:0005739);; Biological Process: signal transduction (GO:0007165);; Biological Process: asymmetric cell division (GO:0008356);; Biological Process: response to abscisic acid (GO:00097…	--	Protein TOO MANY MOUTHS OS=Arabidopsis thaliana GN=TMM PE=2 SV=1	PREDICTED: protein TOO MANY MOUTHS-like [Solanum lycopersicum]
c24832.graph_c0	16.2971	1.17823	0	-3.7934	down	--	--	--	--	unnamed protein product [Vitis vinifera]
c22329.graph_c0	8.40665	2.2856	2.06279e-13	-1.92735	down	--	Biological Process: response to light stimulus (GO:0009416);; Cellular Component: chloroplast (GO:0009507);; Biological Process: response to salt stress (GO:0009651);; Biological Process: response to auxin (GO:0009733);; Biological Process: response to abscisic acid (GO:0009737);;	K14487|0.0|rcu:RCOM_1176020|Indole-3-acetic acid-amido synthetase GH3.5, putative	Probable indole-3-acetic acid-amido synthetase GH3.5 OS=Oryza sativa subsp. japonica GN=GH3.5 PE=2 SV=1	Indole-3-acetic acid-amido synthetase GH3.5, putative [Ricinus communis]
c27484.graph_c0	1226.47	571.461	7.37657e-08	-1.16628	down	--	Biological Process: photosynthetic electron transport in photosystem I (GO:0009773);; Biological Process: photosynthetic NADP+ reduction (GO:0009780);; Cellular Component: chloroplast envelope (GO:0009941);; Molecular Function: chlorophyll binding (GO:0016168);; Biological Process: cysteine biosynthetic process (GO:0019344);; Biological Process: cellular cation homeostasis (GO:0030003);; Cellular…	K08905|2e-70|rcu:RCOM_0302140|Photosystem I reaction center subunit V, chloroplast precursor, putative	Photosystem I reaction center subunit V, chloroplastic OS=Spinacia oleracea GN=PSAG PE=1 SV=1	photosystem I reaction center V (chloroplast) [Solanum tuberosum]
c31194.graph_c0	183.66	64.3721	2.33147e-15	-1.57608	down	Translation, ribosomal structure and biogenesis	Molecular Function: structural constituent of ribosome (GO:0003735);; Cellular Component: chloroplast stroma (GO:0009570);; Cellular Component: chloroplast envelope (GO:0009941);; Cellular Component: large ribosomal subunit (GO:0015934);; Biological Process: isopentenyl diphosphate biosynthetic process, methylerythritol 4-phosphate pathway (GO:0019288);; Molecular Function: rRNA binding (GO:00198…	K02895|2e-97|vvi:100250357|hypothetical protein LOC100250357	50S ribosomal protein L24, chloroplastic OS=Nicotiana tabacum GN=RPL24 PE=1 SV=1	PREDICTED: 50S ribosomal protein L24, chloroplastic-like [Solanum lycopersicum]
c35385.graph_c1	43.8795	14.6219	2.33147e-15	-1.64713	down	--	Biological Process: cellular metabolic process (GO:0044237);; Biological Process: primary metabolic process (GO:0044238);; Biological Process: organic substance metabolic process (GO:0071704);;	--	Extensin OS=Nicotiana tabacum GN=HRGPNT3 PE=2 SV=1	hypothetical protein MA29G21.11 [Coffea arabica]
c40621.graph_c0	30.6899	9.13982	4.28299e-11	-1.79572	down	Translation, ribosomal structure and biogenesis	--	K02358|3e-11|pop:POPTR_414537|hypothetical protein	Elongation factor Tu, chloroplastic OS=Nicotiana tabacum GN=TUFA PE=3 SV=1	chloroplast elongation factor TuB [Nicotiana benthamiana]
c36360.graph_c0	418.413	135.146	0	-1.69452	down	General function prediction only	Biological Process: circadian rhythm (GO:0007623);; Molecular Function: poly(U) RNA binding (GO:0008266);; Biological Process: RNA splicing (GO:0008380);; Cellular Component: chloroplast thylakoid membrane (GO:0009535);; Cellular Component: chloroplast stroma (GO:0009570);; Biological Process: cold acclimation (GO:0009631);; Biological Process: salicylic acid biosynthetic process (GO:0009697);; B…	--	29 kDa ribonucleoprotein, chloroplastic OS=Arabidopsis thaliana GN=RBP29 PE=1 SV=2	chloroplast RNA-binding protein 29 [Arabidopsis thaliana]
c24803.graph_c0	8.47038	3.96906	0.000380263	-1.14802	down	Inorganic ion transport and metabolism	Molecular Function: nucleotide binding (GO:0000166);; Molecular Function: monooxygenase activity (GO:0004497);; Molecular Function: coenzyme binding (GO:0050662);;	--	Probable flavin-containing monooxygenase 1 OS=Arabidopsis thaliana GN=FMO1 PE=2 SV=1	hypothetical protein PRUPE_ppa004370mg [Prunus persica]
c32024.graph_c0	8526.36	2715.72	0	-1.71522	down	Energy production and conversion	Molecular Function: monooxygenase activity (GO:0004497);; Molecular Function: copper ion binding (GO:0005507);; Cellular Component: cell wall (GO:0005618);; Biological Process: response to cold (GO:0009409);; Cellular Component: chloroplast thylakoid membrane (GO:0009535);; Cellular Component: chloroplast stroma (GO:0009570);; Biological Process: response to blue light (GO:0009637);; Biological P…	K01602|1e-94|rcu:RCOM_1158790|Ribulose bisphosphate carboxylase small chain, chloroplast precursor, putative (EC:4.1.1.39)	Ribulose bisphosphate carboxylase small chain, chloroplastic OS=Betula pendula GN=RBCS1 PE=2 SV=1	ribulose-1,5-bisphosphate carboxylase/oxygenase small subunit [Eucalyptus globulus]
c25609.graph_c1	35.2809	11.6564	4.0612e-13	-1.656	down	Posttranslational modification, protein turnover, chaperones	Biological Process: protein peptidyl-prolyl isomerization (GO:0000413);; Molecular Function: peptidyl-prolyl cis-trans isomerase activity (GO:0003755);; Molecular Function: FK506 binding (GO:0005528);; Cellular Component: extracellular region (GO:0005576);; Biological Process: rRNA processing (GO:0006364);; Biological Process: protein folding (GO:0006457);; Cellular Component: chloroplast thylako…	--	Peptidyl-prolyl cis-trans isomerase FKBP20-2, chloroplastic OS=Arabidopsis thaliana GN=FKBP20-2 PE=1 SV=1	hypothetical protein M569_05956, partial [Genlisea aurea]
c32018.graph_c0	58.2394	29.9017	1.2405e-05	-1.02513	down	General function prediction only	Molecular Function: tRNA binding (GO:0000049);; Cellular Component: mitochondrion (GO:0005739);; Cellular Component: chloroplast (GO:0009507);;	--	Aminoacyl tRNA synthase complex-interacting multifunctional protein 1 OS=Cricetulus griseus GN=AIMP1 PE=2 SV=1	PREDICTED: aminoacyl tRNA synthase complex-interacting multifunctional protein 1-like [Cucumis sativus]
c29289.graph_c0	4.44647	1.0908	1.58136e-05	-2.01655	down	--	Molecular Function: protein serine/threonine kinase activity (GO:0004674);; Biological Process: cell cycle (GO:0007049);; Biological Process: phosphorylation (GO:0016310);; Biological Process: primary metabolic process (GO:0044238);; Biological Process: cellular macromolecule metabolic process (GO:0044260);;	K02208|4e-53|vvi:100249168|hypothetical protein LOC100249168	Cyclin-dependent kinase E-1 OS=Arabidopsis thaliana GN=CDKE-1 PE=1 SV=2	hypothetical protein M569_12698, partial [Genlisea aurea]
c18321.graph_c0	18.8347	4.43179	1.08146e-09	-2.10862	down	--	Molecular Function: O-methyltransferase activity (GO:0008171);; Biological Process: methylation (GO:0032259);; Molecular Function: protein dimerization activity (GO:0046983);;	--	Trans-resveratrol di-O-methyltransferase OS=Vitis vinifera GN=ROMT PE=1 SV=2	unnamed protein product [Vitis vinifera]
c21343.graph_c0	6.48551	2.04997	0.00448258	-1.65772	down	--	--	--	--	PREDICTED: uncharacterized protein LOC100853563 [Vitis vinifera]
c31186.graph_c0	831.622	433.871	3.63576e-05	-1.00323	down	--	Molecular Function: hydrolase activity, acting on ester bonds (GO:0016788);;	--	Acetylajmalan esterase OS=Rauvolfia serpentina GN=AAE PE=1 SV=1	acetylajmalan acetylesterase [Striga asiatica]
c35876.graph_c0	8.52019	3.03495	2.01839e-06	-1.53372	down	--	Cellular Component: plastid (GO:0009536);;	--	Beta-carotene isomerase D27, chloroplastic OS=Oryza sativa subsp. japonica GN=D27 PE=1 SV=1	PREDICTED: uncharacterized protein LOC101220175 [Cucumis sativus]
c25000.graph_c0	6.62291	2.29172	2.51261e-05	-1.56658	down	--	Biological Process: response to stress (GO:0006950);; Biological Process: signal transduction (GO:0007165);; Biological Process: response to abiotic stimulus (GO:0009628);; Biological Process: response to hormone (GO:0009725);; Biological Process: cellular metabolic process (GO:0044237);; Biological Process: response to oxygen-containing compound (GO:1901700);;	K09422|1e-101|pop:POPTR_566874|MYB036	Myb-related protein 305 OS=Antirrhinum majus GN=MYB305 PE=2 SV=1	Myb-like transcription factor [Medicago truncatula]
c40717.graph_c0	148.267	30.8519	0	-2.32619	down	--	Molecular Function: structural constituent of ribosome (GO:0003735);; Cellular Component: ribosome (GO:0005840);; Biological Process: translation (GO:0006412);; Cellular Component: chloroplast (GO:0009507);;	--	30S ribosomal protein 3, chloroplastic OS=Spinacia oleracea GN=PSRP3 PE=1 SV=1	Ribosomal protein PSRP-3/Ycf65 [Theobroma cacao]
c25709.graph_c0	21.2999	5.18714	4.65183e-14	-2.0804	down	Posttranslational modification, protein turnover, chaperones	Biological Process: protein peptidyl-prolyl isomerization (GO:0000413);; Molecular Function: peptidyl-prolyl cis-trans isomerase activity (GO:0003755);; Molecular Function: protein binding (GO:0005515);; Molecular Function: FK506 binding (GO:0005528);; Cellular Component: extracellular region (GO:0005576);; Biological Process: protein folding (GO:0006457);; Cellular Component: chloroplast thylako…	--	Peptidyl-prolyl cis-trans isomerase FKBP16-2, chloroplastic OS=Arabidopsis thaliana GN=FKBP16-2 PE=1 SV=1	PREDICTED: peptidyl-prolyl cis-trans isomerase FKBP16-2, chloroplastic-like [Solanum lycopersicum]
c39168.graph_c1	201.901	41.2939	0	-2.35202	down	--	--	--	--	hypothetical protein M569_03189, partial [Genlisea aurea]
c29785.graph_c0	4.76085	1.45731	2.92528e-07	-1.7431	down	Function unknown	Molecular Function: transferase activity (GO:0016740);;	K10532|0.0|rcu:RCOM_1353730|hypothetical protein	Heparan-alpha-glucosaminide N-acetyltransferase OS=Mus musculus GN=Hgsnat PE=1 SV=2	PREDICTED: heparan-alpha-glucosaminide N-acetyltransferase-like [Vitis vinifera]
c14198.graph_c0	98.0703	45.4039	5.57542e-08	-1.17468	down	Translation, ribosomal structure and biogenesis	Molecular Function: RNA binding (GO:0003723);; Molecular Function: structural constituent of ribosome (GO:0003735);; Cellular Component: ribosome (GO:0005840);; Biological Process: translation (GO:0006412);; Cellular Component: chloroplast thylakoid (GO:0009534);; Cellular Component: chloroplast stroma (GO:0009570);;	--	Ribosome-binding factor PSRP1, chloroplastic OS=Spinacia oleracea GN=PSRP1 PE=1 SV=2	chloroplast ribosomal protein [Solanum tuberosum]
c40319.graph_c0	1033.34	480.656	9.35017e-08	-1.1688	down	--	Biological Process: rRNA processing (GO:0006364);; Cellular Component: photosystem I (GO:0009522);; Cellular Component: photosystem II (GO:0009523);; Cellular Component: chloroplast thylakoid membrane (GO:0009535);; Biological Process: response to blue light (GO:0009637);; Biological Process: response to high light intensity (GO:0009644);; Biological Process: response to sucrose (GO:0009744);; Bi…	K08907|1e-154|pop:POPTR_820261|Lhca1-2	Chlorophyll a-b binding protein 6A, chloroplastic OS=Solanum lycopersicum GN=CAB6A PE=2 SV=1	chlorophyll a/b-binding protein [Solanum lycopersicum]
c32345.graph_c0	15.3843	1.8469	0	-3.09779	down	Posttranslational modification, protein turnover, chaperones	Biological Process: protein peptidyl-prolyl isomerization (GO:0000413);; Molecular Function: peptidyl-prolyl cis-trans isomerase activity (GO:0003755);; Biological Process: protein folding (GO:0006457);; Biological Process: response to heat (GO:0009408);; Biological Process: cellular response to stress (GO:0033554);;	--	70 kDa peptidyl-prolyl isomerase OS=Triticum aestivum GN=FKBP70 PE=1 SV=1	PREDICTED: LOW QUALITY PROTEIN: 70 kDa peptidyl-prolyl isomerase-like [Vitis vinifera]
c39092.graph_c0	62.8681	8.01469	0	-3.02863	down	--	Molecular Function: sequence-specific DNA binding transcription factor activity (GO:0003700);; Molecular Function: peptide-aspartate beta-dioxygenase activity (GO:0004597);; Cellular Component: nucleus (GO:0005634);; Biological Process: regulation of transcription, DNA-templated (GO:0006355);; Molecular Function: methyltransferase activity (GO:0008168);; Biological Process: methylation (GO:003225…	--	Lysine-specific demethylase 8 OS=Homo sapiens GN=KDM8 PE=1 SV=1	predicted protein [Populus trichocarpa]
c15022.graph_c0	283.268	92.7886	0	-1.67366	down	Translation, ribosomal structure and biogenesis	Molecular Function: structural constituent of ribosome (GO:0003735);; Cellular Component: ribosome (GO:0005840);; Biological Process: translation (GO:0006412);; Biological Process: pattern specification process (GO:0007389);; Biological Process: regulation of cell size (GO:0008361);; Cellular Component: chloroplast stroma (GO:0009570);; Biological Process: plant-type cell wall organization (GO:00…	K02881|1e-75|ath:AT1G48350|ribosomal protein L18 family protein	50S ribosomal protein L18, chloroplastic OS=Arabidopsis thaliana GN=RPL18 PE=2 SV=1	PREDICTED: 50S ribosomal protein L18, chloroplastic-like [Solanum lycopersicum]
c33728.graph_c0	58.5929	25.9305	6.00265e-09	-1.23957	down	Carbohydrate transport and metabolism	Biological Process: glycogen biosynthetic process (GO:0005978);; Biological Process: pentose-phosphate shunt (GO:0006098);; Biological Process: rRNA processing (GO:0006364);; Molecular Function: glucose-1-phosphate adenylyltransferase activity (GO:0008878);; Cellular Component: chloroplast stroma (GO:0009570);; Biological Process: response to blue light (GO:0009637);; Biological Process: chloropl…	K00975|0.0|vvi:100263079|hypothetical protein LOC100263079	Glucose-1-phosphate adenylyltransferase large subunit 1, chloroplastic OS=Arabidopsis thaliana GN=ADG2 PE=1 SV=3	PREDICTED: glucose-1-phosphate adenylyltransferase large subunit 1, chloroplastic [Vitis vinifera]
c36484.graph_c0	57.7087	15.8561	0	-1.92696	down	Carbohydrate transport and metabolism	Biological Process: maltose metabolic process (GO:0000023);; Biological Process: sucrose metabolic process (GO:0005985);; Biological Process: fructose metabolic process (GO:0006000);; Biological Process: pentose-phosphate shunt (GO:0006098);; Biological Process: rRNA processing (GO:0006364);; Biological Process: response to cold (GO:0009409);; Cellular Component: chloroplast stroma (GO:0009570);;…	K03841|0.0|vvi:100240924|hypothetical protein LOC100240924	Fructose-1,6-bisphosphatase, chloroplastic OS=Arabidopsis thaliana GN=FBP PE=2 SV=2	PREDICTED: fructose-1,6-bisphosphatase, chloroplastic-like [Vitis vinifera]
c26038.graph_c1	12.5743	4.61479	2.12278e-06	-1.49292	down	--	Biological Process: cell-cell signaling (GO:0007267);; Biological Process: stomatal complex patterning (GO:0010375);; Biological Process: mRNA modification (GO:0016556);; Biological Process: positive regulation of stomatal complex development (GO:2000123);;	--	EPIDERMAL PATTERNING FACTOR-like protein 9 OS=Arabidopsis thaliana GN=EPFL9 PE=1 SV=1	Stomagen [Theobroma cacao]
c40073.graph_c0	15.9766	1.02558	0	-3.94168	down	Secondary metabolites biosynthesis, transport and catabolism	Molecular Function: monooxygenase activity (GO:0004497);; Molecular Function: iron ion binding (GO:0005506);; Molecular Function: electron carrier activity (GO:0009055);; Molecular Function: oxidoreductase activity, acting on single donors with incorporation of molecular oxygen, incorporation of two atoms of oxygen (GO:0016702);; Molecular Function: oxidoreductase activity, acting on paired donor…	--	Flavonoid 3&apos;-monooxygenase OS=Petunia hybrida GN=CYP75B2 PE=2 SV=1	CYP92B2v2 [Nicotiana tabacum]
c15662.graph_c0	3.07073	0.110684	0.000117277	-3.68961	down	Cell motility	--	--	Dehydrin COR410 OS=Triticum aestivum GN=COR410 PE=2 SV=1	dehydrin [Citrus x paradisi]
c28579.graph_c0	17.1847	6.01841	4.17499e-12	-1.57279	down	Secondary metabolites biosynthesis, transport and catabolism	Molecular Function: iron ion binding (GO:0005506);; Molecular Function: electron carrier activity (GO:0009055);; Cellular Component: chloroplast stroma (GO:0009570);; Biological Process: isopentenyl diphosphate biosynthetic process, methylerythritol 4-phosphate pathway (GO:0019288);; Molecular Function: oxygen binding (GO:0019825);; Molecular Function: heme binding (GO:0020037);; Cellular Compone…	--	Cytochrome P450 97B2, chloroplastic OS=Glycine max GN=CYP97B2 PE=2 SV=1	PREDICTED: cytochrome P450 97B2, chloroplastic [Vitis vinifera]
c27137.graph_c0	597.334	271.335	1.44439e-08	-1.20286	down	Amino acid transport and metabolism	Molecular Function: aminomethyltransferase activity (GO:0004047);; Molecular Function: glycine dehydrogenase (decarboxylating) activity (GO:0004375);; Cellular Component: mitochondrion (GO:0005739);; Cellular Component: glycine cleavage complex (GO:0005960);; Biological Process: pentose-phosphate shunt (GO:0006098);; Biological Process: rRNA processing (GO:0006364);; Cellular Component: chloropla…	K02437|2e-97|ath:AT1G32470|glycine cleavage system H protein, mitochondrial, putative	Glycine cleavage system H protein 3, mitochondrial OS=Arabidopsis thaliana GN=GDH3 PE=1 SV=1	probable glycine cleavage system H protein 2 [Arabidopsis thaliana]
c16077.graph_c0	26.0612	11.9306	9.12245e-07	-1.18811	down	Amino acid transport and metabolism	Molecular Function: shikimate kinase activity (GO:0004765);; Biological Process: glycine catabolic process (GO:0006546);; Biological Process: unsaturated fatty acid biosynthetic process (GO:0006636);; Biological Process: oxidoreduction coenzyme metabolic process (GO:0006733);; Biological Process: vitamin metabolic process (GO:0006766);; Biological Process: aromatic amino acid family biosynthetic …	--	Probable inactive shikimate kinase like 2, chloroplastic OS=Arabidopsis thaliana GN=SKL2 PE=2 SV=2	PREDICTED: probable inactive shikimate kinase like 2, chloroplastic-like [Solanum lycopersicum]
c27358.graph_c2	6.71831	3.01158	0.0036675	-1.20298	down	--	Biological Process: metabolic process (GO:0008152);; Molecular Function: amino acid binding (GO:0016597);;	--	[Protein-PII] uridylyltransferase OS=Mannheimia succiniciproducens (strain MBEL55E) GN=glnD PE=3 SV=1	ACT domain repeat 4 isoform 2 [Theobroma cacao]
c34670.graph_c0	31.9196	16.4044	3.33863e-05	-1.02278	down	Energy production and conversion	Biological Process: single-organism process (GO:0044699);; Biological Process: regulation of cellular process (GO:0050794);; Biological Process: response to stimulus (GO:0050896);;	--	Ethylene-responsive transcription factor 1B OS=Arabidopsis thaliana GN=ERF1B PE=1 SV=2	ERF transcription factor 5 [Nicotiana tabacum]
c35613.graph_c0	10.348	4.1461	6.66176e-06	-1.37064	down	--	Cellular Component: chloroplast (GO:0009507);; Biological Process: chlorophyll catabolic process (GO:0015996);; Molecular Function: chlorophyllase activity (GO:0047746);;	--	Chlorophyllase-2, chloroplastic OS=Arabidopsis thaliana GN=CLH2 PE=1 SV=1	putative chlorophyllase [Nicotiana tabacum]
c33514.graph_c0	6.07464	1.97063	6.41104e-05	-1.64904	down	--	Cellular Component: extracellular region (GO:0005576);; Biological Process: plant-type cell wall organization (GO:0009664);; Cellular Component: membrane (GO:0016020);;	--	Expansin-A4 OS=Oryza sativa subsp. japonica GN=EXPA4 PE=2 SV=1	alpha-expansin [Dianthus caryophyllus]
c26381.graph_c0	4.37611	1.14284	0.000443552	-1.91468	down	--	Molecular Function: iron ion binding (GO:0005506);; Molecular Function: protein binding (GO:0005515);; Cellular Component: extracellular region (GO:0005576);; Biological Process: fatty acid metabolic process (GO:0006631);; Molecular Function: electron carrier activity (GO:0009055);; Molecular Function: alkane 1-monooxygenase activity (GO:0018685);; Molecular Function: oxygen binding (GO:0019825);…	--	Cytochrome P450 86A2 OS=Arabidopsis thaliana GN=CYP86A2 PE=2 SV=1	PREDICTED: cytochrome P450 86A2-like [Solanum lycopersicum]
c24633.graph_c0	15.2879	7.27054	1.42278e-05	-1.13211	down	--	Molecular Function: transferase activity, transferring hexosyl groups (GO:0016758);;	K13691|0.0|pop:POPTR_807713|hypothetical protein	UDP-glycosyltransferase 74F2 OS=Arabidopsis thaliana GN=UGT74F2 PE=1 SV=1	hypothetical protein PRUPE_ppa016883mg [Prunus persica]
c15217.graph_c0	21.5697	5.42594	0	-2.04903	down	--	--	--	Myosin-7 OS=Bos taurus GN=MYH7 PE=2 SV=1	PREDICTED: uncharacterized protein LOC101260509 [Solanum lycopersicum]
c32030.graph_c0	115.827	38.8973	3.33067e-16	-1.63732	down	--	Cellular Component: chloroplast thylakoid (GO:0009534);; Biological Process: cellular carbohydrate metabolic process (GO:0044262);; Biological Process: single-organism carbohydrate metabolic process (GO:0044723);;	--	Rhodanese-like domain-containing protein 14, chloroplastic OS=Arabidopsis thaliana GN=At4g27700 PE=2 SV=1	predicted protein [Populus trichocarpa]
c33303.graph_c0	57.5629	22.5598	2.9852e-11	-1.4137	down	--	Biological Process: maltose metabolic process (GO:0000023);; Cellular Component: chloroplast thylakoid membrane (GO:0009535);; Cellular Component: chloroplast envelope (GO:0009941);; Biological Process: leaf morphogenesis (GO:0009965);; Biological Process: photosystem II assembly (GO:0010207);; Biological Process: starch biosynthetic process (GO:0019252);; Biological Process: cell differentiation…	--	Thylakoid membrane protein slr0575 OS=Synechocystis sp. (strain PCC 6803 / Kazusa) GN=slr0575 PE=4 SV=1	PREDICTED: thylakoid membrane protein slr0575-like [Solanum lycopersicum]
c39538.graph_c0	14.7605	7.16515	6.69062e-06	-1.10422	down	Posttranslational modification, protein turnover, chaperones	Molecular Function: serine-type endopeptidase activity (GO:0004252);; Cellular Component: cell wall (GO:0005618);; Biological Process: proteolysis (GO:0006508);; Cellular Component: apoplast (GO:0048046);;	--	Subtilisin-like protease OS=Arabidopsis thaliana GN=ARA12 PE=1 SV=1	PREDICTED: subtilisin-like protease-like [Solanum lycopersicum]
c35395.graph_c0	37.6256	17.9551	1.56625e-06	-1.12947	down	--	Cellular Component: plastid (GO:0009536);;	--	--	Uncharacterized protein isoform 1 [Theobroma cacao]
c39114.graph_c1	127.271	44.9653	2.33147e-15	-1.5649	down	--	Biological Process: pentose-phosphate shunt (GO:0006098);; Biological Process: rRNA processing (GO:0006364);; Biological Process: circadian rhythm (GO:0007623);; Cellular Component: plastid chromosome (GO:0009508);; Cellular Component: chloroplast thylakoid membrane (GO:0009535);; Biological Process: response to blue light (GO:0009637);; Biological Process: chloroplast relocation (GO:0009902);; C…	--	Protein TIC 62, chloroplastic OS=Pisum sativum GN=TIC62 PE=1 SV=2	unknown [Populus trichocarpa]
c40506.graph_c0	214.76	70.6056	0	-1.66803	down	--	Cellular Component: chloroplast thylakoid membrane (GO:0009535);; Cellular Component: chloroplast envelope (GO:0009941);; Biological Process: plastid translation (GO:0032544);;	--	50S ribosomal protein 5, chloroplastic OS=Arabidopsis thaliana GN=PSRP5 PE=2 SV=1	PREDICTED: 50S ribosomal protein 5, chloroplastic-like [Solanum lycopersicum]
c27849.graph_c0	43.0209	14.1896	2.77556e-14	-1.66011	down	--	Biological Process: maltose metabolic process (GO:0000023);; Molecular Function: calcium ion binding (GO:0005509);; Cellular Component: chloroplast thylakoid membrane (GO:0009535);; Cellular Component: chloroplast thylakoid lumen (GO:0009543);; Cellular Component: photosystem II oxygen evolving complex (GO:0009654);; Biological Process: thylakoid membrane organization (GO:0010027);; Biological Pr…	--	PsbP domain-containing protein 5, chloroplastic OS=Arabidopsis thaliana GN=PPD5 PE=1 SV=3	PREDICTED: psbP domain-containing protein 5, chloroplastic [Vitis vinifera]
c42721.graph_c0	4.82991	0.34108	0	-3.77952	down	Posttranslational modification, protein turnover, chaperones	Molecular Function: serine-type endopeptidase activity (GO:0004252);; Cellular Component: extracellular region (GO:0005576);; Cellular Component: cell wall (GO:0005618);; Biological Process: proteolysis (GO:0006508);; Cellular Component: external side of plasma membrane (GO:0009897);; Biological Process: stomatal complex morphogenesis (GO:0010103);; Cellular Component: cytoplasmic membrane-bounde…	--	Subtilisin-like protease SDD1 OS=Arabidopsis thaliana GN=SDD1 PE=2 SV=1	PREDICTED: subtilisin-like protease SDD1-like [Solanum lycopersicum]
c35930.graph_c0	12.4528	3.01905	3.33067e-16	-2.09206	down	General function prediction only	Biological Process: maltose metabolic process (GO:0000023);; Molecular Function: nucleotide binding (GO:0000166);; Molecular Function: RNA binding (GO:0003723);; Biological Process: thylakoid membrane organization (GO:0010027);; Biological Process: starch biosynthetic process (GO:0019252);; Biological Process: chloroplast mRNA modification (GO:1900871);;	--	Glycine-rich RNA-binding protein 2, mitochondrial OS=Arabidopsis thaliana GN=RBG2 PE=1 SV=1	hypothetical protein PRUPE_ppa006586mg [Prunus persica]
c40693.graph_c0	143.509	28.8322	0	-2.37776	down	Posttranslational modification, protein turnover, chaperones	Biological Process: water transport (GO:0006833);; Biological Process: response to cold (GO:0009409);; Biological Process: response to light stimulus (GO:0009416);; Cellular Component: chloroplast thylakoid membrane (GO:0009535);; Cellular Component: chloroplast stroma (GO:0009570);; Biological Process: response to salt stress (GO:0009651);; Biological Process: response to sucrose (GO:0009744);; …	--	Unknown protein DS12 from 2D-PAGE of leaf, chloroplastic OS=Oryza sativa subsp. japonica GN=Os08g0242700 PE=2 SV=2	PREDICTED: unknown protein DS12 from 2D-PAGE of leaf, chloroplastic-like [Solanum lycopersicum]
c24239.graph_c0	4.23717	1.06909	2.45148e-07	-1.99998	down	--	--	--	Protein FANTASTIC FOUR 3 OS=Arabidopsis thaliana GN=FAF3 PE=2 SV=1	Uncharacterized protein TCM_041386 [Theobroma cacao]
c19663.graph_c0	2.06483	0.630433	0.000291888	-1.72066	down	Amino acid transport and metabolism	Molecular Function: transporter activity (GO:0005215);; Cellular Component: plasma membrane (GO:0005886);; Biological Process: oligopeptide transport (GO:0006857);; Biological Process: response to wounding (GO:0009611);; Biological Process: response to jasmonic acid (GO:0009753);; Cellular Component: integral component of membrane (GO:0016021);; Biological Process: cellular cation homeostasis (GO…	--	Nitrate transporter 1.4 OS=Arabidopsis thaliana GN=NRT1.4 PE=1 SV=1	Major facilitator superfamily protein isoform 2 [Theobroma cacao]
c14274.graph_c0	1367.18	390.365	0	-1.87274	down	Coenzyme transport and metabolism	Biological Process: maltose metabolic process (GO:0000023);; Cellular Component: mitochondrion (GO:0005739);; Cellular Component: cytosol (GO:0005829);; Biological Process: cellular response to DNA damage stimulus (GO:0006974);; Molecular Function: zinc ion binding (GO:0008270);; Biological Process: thiamine biosynthetic process (GO:0009228);; Biological Process: response to cold (GO:0009409);; C…	K03146|1e-133|pop:POPTR_568201|thiazole synthase	Thiamine thiazole synthase, chloroplastic OS=Citrus sinensis GN=THI1 PE=2 SV=1	PREDICTED: thiamine thiazole synthase, chloroplastic-like [Cucumis sativus]
c33682.graph_c0	115.998	59.2825	6.73431e-06	-1.03225	down	--	Biological Process: phosphate-containing compound metabolic process (GO:0006796);; Cellular Component: chloroplast thylakoid membrane (GO:0009535);; Biological Process: chloroplast relocation (GO:0009902);; Biological Process: leaf morphogenesis (GO:0009965);; Biological Process: thylakoid membrane organization (GO:0010027);; Biological Process: carotenoid biosynthetic process (GO:0016117);; Mole…	--	--	Proline-rich family protein [Theobroma cacao]
c42910.graph_c0	4.27409	0.205411	0.00629522	-3.29585	down	--	--	--	--	conserved hypothetical protein [Ricinus communis]
c19447.graph_c0	4.85167	1.37358	0.000792901	-1.80966	down	--	--	--	--	unnamed protein product [Vitis vinifera]
c28467.graph_c0	6.79503	0.515631	4.90812e-10	-3.46713	down	--	Molecular Function: protein binding (GO:0005515);; Cellular Component: endoplasmic reticulum (GO:0005783);; Biological Process: sterol biosynthetic process (GO:0016126);; Biological Process: pentacyclic triterpenoid biosynthetic process (GO:0019745);; Molecular Function: heme binding (GO:0020037);; Cellular Component: organelle membrane (GO:0031090);; Biological Process: defense response to bacte…	--	Cytochrome b5, seed isoform OS=Nicotiana tabacum PE=2 SV=1	PREDICTED: cytochrome b5-like [Brachypodium distachyon]
c18314.graph_c0	9.74396	0.156097	7.41962e-13	-4.82336	down	--	Cellular Component: nucleus (GO:0005634);; Cellular Component: plasma membrane (GO:0005886);; Molecular Function: transferase activity (GO:0016740);; Biological Process: petal morphogenesis (GO:0048446);;	--	O-acyltransferase WSD1 OS=Arabidopsis thaliana GN=WSD1 PE=2 SV=1	predicted protein [Populus trichocarpa]
c33741.graph_c2	41.9483	15.893	1.11517e-11	-1.46187	down	--	Molecular Function: methyltransferase activity (GO:0008168);; Cellular Component: chloroplast (GO:0009507);; Biological Process: methylation (GO:0032259);;	--	--	hypothetical protein M569_15168, partial [Genlisea aurea]
c31735.graph_c0	2.32111	0.121693	6.70797e-13	-3.9219	down	--	Molecular Function: magnesium ion binding (GO:0000287);; Cellular Component: plastid (GO:0009536);; Molecular Function: terpene synthase activity (GO:0010333);; Molecular Function: hydrolase activity (GO:0016787);; Molecular Function: manganese ion binding (GO:0030145);; Biological Process: geranyl diphosphate metabolic process (GO:0033383);; Molecular Function: protein homodimerization activity …	--	Geraniol synthase, chloroplastic OS=Ocimum basilicum GN=GES PE=1 SV=1	geraniol synthase [Phyla dulcis]
c37922.graph_c0	7.58324	3.84119	0.000106761	-1.04179	down	--	Biological Process: signal transduction (GO:0007165);; Biological Process: response to bacterium (GO:0009617);; Biological Process: response to endogenous stimulus (GO:0009719);; Biological Process: regulation of cell death (GO:0010941);; Molecular Function: lipase activity (GO:0016298);; Biological Process: regulation of cellular metabolic process (GO:0031323);; Biological Process: regulation of…	--	PsbP domain-containing protein 2, chloroplastic OS=Arabidopsis thaliana GN=PPD2 PE=1 SV=1	uncharacterized protein LOC100788725 [Glycine max]
c38245.graph_c0	7.6562	2.31811	9.17365e-08	-1.76051	down	Inorganic ion transport and metabolism	Cellular Component: extracellular region (GO:0005576);; Cellular Component: cytosol (GO:0005829);; Biological Process: response to oxidative stress (GO:0006979);; Cellular Component: plastid (GO:0009536);; Molecular Function: L-ascorbate peroxidase activity (GO:0016688);; Molecular Function: heme binding (GO:0020037);; Biological Process: oxidation-reduction process (GO:0055114);;	K00434|9e-75|vvi:100247405|similar to APX6 (ASCORBATE PEROXIDASE 6)	Putative L-ascorbate peroxidase 6 OS=Arabidopsis thaliana GN=APX6 PE=2 SV=1	PREDICTED: putative L-ascorbate peroxidase 6 [Vitis vinifera]
c35731.graph_c0	4.97767	1.77308	0.0024922	-1.50932	down	--	--	--	--	PREDICTED: uncharacterized protein LOC100260838 [Vitis vinifera]
c25929.graph_c1	12.1501	1.15866	0	-3.3346	down	Defense mechanisms	Cellular Component: vacuole (GO:0005773);; Cellular Component: plasma membrane (GO:0005886);; Biological Process: drug transmembrane transport (GO:0006855);; Biological Process: response to nematode (GO:0009624);; Molecular Function: drug transmembrane transporter activity (GO:0015238);; Molecular Function: antiporter activity (GO:0015297);;	--	Protein TRANSPARENT TESTA 12 OS=Arabidopsis thaliana GN=TT12 PE=2 SV=1	PREDICTED: protein TRANSPARENT TESTA 12-like [Solanum lycopersicum]
c33769.graph_c1	145.778	36.0893	0	-2.07749	down	--	Molecular Function: mRNA binding (GO:0003729);; Molecular Function: catalytic activity (GO:0003824);; Molecular Function: protein binding (GO:0005515);; Biological Process: pentose-phosphate shunt (GO:0006098);; Biological Process: rRNA processing (GO:0006364);; Molecular Function: poly(U) RNA binding (GO:0008266);; Cellular Component: chloroplast thylakoid (GO:0009534);; Biological Process: resp…	--	Chloroplast stem-loop binding protein of 41 kDa a, chloroplastic OS=Arabidopsis thaliana GN=CSP41A PE=1 SV=1	Chloroplast stem-loop binding protein of 41 kDa isoform 1 [Theobroma cacao]
c15680.graph_c0	1.23675	0.260241	0.00185992	-2.15416	down	--	--	--	Proline-rich receptor-like protein kinase PERK9 OS=Arabidopsis thaliana GN=PERK9 PE=2 SV=1	PREDICTED: uncharacterized protein LOC101309247 [Fragaria vesca subsp. vesca]
c34710.graph_c0	17.1303	7.77994	9.10628e-06	-1.19683	down	--	Cellular Component: plasma membrane (GO:0005886);; Cellular Component: chloroplast (GO:0009507);; Biological Process: photosystem II assembly (GO:0010207);;	--	Ycf49-like protein OS=Synechocystis sp. (strain PCC 6803 / Kazusa) GN=sll0608 PE=3 SV=1	PREDICTED: ycf49-like protein-like isoform 1 [Solanum lycopersicum]
c39056.graph_c1	19.9765	8.16924	1.45208e-08	-1.34962	down	--	--	--	Protein CHLOROPLAST IMPORT APPARATUS 2 OS=Arabidopsis thaliana GN=CIA2 PE=2 SV=1	PREDICTED: protein CHLOROPLAST IMPORT APPARATUS 2-like [Solanum lycopersicum]
c40708.graph_c0	140.773	39.1579	0	-1.90926	down	General function prediction only	Molecular Function: RNA binding (GO:0003723);; Biological Process: phosphate-containing compound metabolic process (GO:0006796);; Biological Process: response to cold (GO:0009409);; Biological Process: RNA modification (GO:0009451);; Cellular Component: thylakoid (GO:0009579);; Biological Process: regulation of gene expression (GO:0010468);; Biological Process: cellular component organization (GO…	--	31 kDa ribonucleoprotein, chloroplastic OS=Arabidopsis thaliana GN=RBP31 PE=1 SV=1	unnamed protein product [Vitis vinifera]
c38588.graph_c0	358.141	185.411	1.63844e-05	-1.0143	down	Amino acid transport and metabolism	Molecular Function: glutamate-ammonia ligase activity (GO:0004356);; Molecular Function: ATP binding (GO:0005524);; Cellular Component: mitochondrion (GO:0005739);; Biological Process: glycolysis (GO:0006096);; Biological Process: pentose-phosphate shunt (GO:0006098);; Biological Process: glutamine biosynthetic process (GO:0006542);; Biological Process: water transport (GO:0006833);; Biological P…	K01915|0.0|rcu:RCOM_0678350|glutamine synthetase plant, putative (EC:6.3.1.2)	Glutamine synthetase, chloroplastic OS=Daucus carota GN=GLN2 PE=2 SV=1	glutamine synthetase GS58 [Nicotiana attenuata]
c36218.graph_c0	58.0429	28.0076	5.44462e-07	-1.11484	down	--	Molecular Function: inorganic phosphate transmembrane transporter activity (GO:0005315);; Biological Process: phosphate ion transport (GO:0006817);; Cellular Component: integral component of membrane (GO:0016021);; Biological Process: transmembrane transport (GO:0055085);;	--	Inorganic phosphate transporter 1-4 OS=Arabidopsis thaliana GN=PHT1-4 PE=1 SV=1	phosphate transporter [Catharanthus roseus]
c35982.graph_c0	5.16859	2.01798	0.000222896	-1.39795	down	--	Cellular Component: nucleus (GO:0005634);; Biological Process: embryo sac development (GO:0009553);; Biological Process: pollen development (GO:0009555);; Biological Process: meiotic DNA double-strand break formation (GO:0042138);; Biological Process: chiasma assembly (GO:0051026);;	--	Protein PAIR1 OS=Oryza sativa subsp. japonica GN=PAIR1 PE=2 SV=1	PREDICTED: protein PAIR1-like [Vitis vinifera]
c14291.graph_c0	273.047	122.094	5.50231e-09	-1.2254	down	Translation, ribosomal structure and biogenesis	Molecular Function: structural constituent of ribosome (GO:0003735);; Cellular Component: ribosome (GO:0005840);; Biological Process: rRNA processing (GO:0006364);; Biological Process: translation (GO:0006412);; Cellular Component: chloroplast stroma (GO:0009570);; Cellular Component: chloroplast envelope (GO:0009941);; Biological Process: photosystem II assembly (GO:0010207);; Biological Process…	K02906|1e-142|vvi:100267754|hypothetical protein LOC100267754	50S ribosomal protein L3-1, chloroplastic OS=Arabidopsis thaliana GN=RPL3A PE=2 SV=1	hypothetical protein M569_16160, partial [Genlisea aurea]
c18977.graph_c0	21.8949	10.4467	1.85953e-05	-1.12727	down	Amino acid transport and metabolism	Biological Process: lipid metabolic process (GO:0006629);; Molecular Function: hydrolase activity, acting on ester bonds (GO:0016788);;	--	GDSL esterase/lipase CPRD49 OS=Arabidopsis thaliana GN=CPRD49 PE=2 SV=1	unknown [Lotus japonicus]
c32084.graph_c0	79.6564	20.878	0	-1.99385	down	--	Cellular Component: extracellular region (GO:0005576);; Biological Process: lipid metabolic process (GO:0006629);; Biological Process: response to salicylic acid (GO:0009751);; Biological Process: stomatal complex morphogenesis (GO:0010103);; Biological Process: response to lithium ion (GO:0010226);; Biological Process: hyperosmotic salinity response (GO:0042538);;	--	GDSL esterase/lipase At5g33370 OS=Arabidopsis thaliana GN=At5g33370 PE=2 SV=1	PREDICTED: GDSL esterase/lipase At5g33370-like isoform 1 [Solanum lycopersicum]
c40553.graph_c0	198.6	74.9866	2.69007e-13	-1.46891	down	Translation, ribosomal structure and biogenesis	Molecular Function: structural constituent of ribosome (GO:0003735);; Cellular Component: ribosome (GO:0005840);; Biological Process: translation (GO:0006412);; Cellular Component: chloroplast stroma (GO:0009570);; Biological Process: embryo development ending in seed dormancy (GO:0009793);; Cellular Component: chloroplast envelope (GO:0009941);; Biological Process: thylakoid membrane organizatio…	--	50S ribosomal protein L19, chloroplastic OS=Spinacia oleracea GN=RPL19 PE=1 SV=2	PREDICTED: 50S ribosomal protein L19, chloroplastic-like [Solanum lycopersicum]
c32997.graph_c0	4.20588	0.711859	2.5273e-05	-2.45995	down	General function prediction only	Cellular Component: cytoplasm (GO:0005737);; Molecular Function: phosphatidylethanolamine binding (GO:0008429);; Biological Process: seed dormancy process (GO:0010162);; Biological Process: myo-inositol hexakisphosphate biosynthetic process (GO:0010264);; Biological Process: positive regulation of transcription, DNA-templated (GO:0045893);;	K06910|2e-94|rcu:RCOM_0489120|phosphatidylethanolamine binding protein, putative	UPF0098 protein MTH_273 OS=Methanothermobacter thermautotrophicus (strain ATCC 29096 / DSM 1053 / JCM 10044 / NBRC 100330 / Delta H) GN=MTH_273 PE=3 SV=1	hypothetical protein PRUPE_ppa012491mg [Prunus persica]
c36483.graph_c0	30.1139	8.06077	0	-1.9613	down	--	Molecular Function: 1-acylglycerol-3-phosphate O-acyltransferase activity (GO:0003841);; Cellular Component: mitochondrion (GO:0005739);; Biological Process: phosphatidylglycerol biosynthetic process (GO:0006655);; Biological Process: flower development (GO:0009908);; Biological Process: cutin biosynthetic process (GO:0010143);; Biological Process: dephosphorylation (GO:0016311);; Molecular Funct…	K13508|0.0|pop:POPTR_560888|glycerol-3-phosphate acyltransferase (EC:2.3.1.51)	Glycerol-3-phosphate 2-O-acyltransferase 6 OS=Arabidopsis thaliana GN=GPAT6 PE=1 SV=1	predicted protein [Populus trichocarpa]
c25262.graph_c0	8.32038	0.725353	0	-3.45411	down	--	Molecular Function: binding (GO:0005488);;	--	--	hypothetical protein VITISV_001696 [Vitis vinifera]
c25572.graph_c0	49.0391	15.9492	1.11022e-15	-1.68167	down	Inorganic ion transport and metabolism	Biological Process: rRNA processing (GO:0006364);; Biological Process: tRNA metabolic process (GO:0006399);; Cellular Component: chloroplast (GO:0009507);; Biological Process: chloroplast organization (GO:0009658);; Biological Process: isopentenyl diphosphate biosynthetic process, methylerythritol 4-phosphate pathway (GO:0019288);; Biological Process: protein targeting to chloroplast (GO:0045036)…	--	Rhodanese-like domain-containing protein 11, chloroplastic OS=Arabidopsis thaliana GN=STR11 PE=2 SV=1	PREDICTED: uncharacterized protein LOC100243259 [Vitis vinifera]
c23394.graph_c0	161.212	73.78	2.13961e-08	-1.19171	down	Carbohydrate transport and metabolism	Molecular Function: ribulose-phosphate 3-epimerase activity (GO:0004750);; Biological Process: pentose-phosphate shunt (GO:0006098);; Biological Process: response to cold (GO:0009409);; Cellular Component: chloroplast thylakoid membrane (GO:0009535);; Cellular Component: chloroplast stroma (GO:0009570);; Biological Process: response to nematode (GO:0009624);; Biological Process: embryo developmen…	K01783|1e-167|pop:POPTR_744163|ribulose-phosphate 3-epimerase (EC:5.1.3.1)	Ribulose-phosphate 3-epimerase, chloroplastic (Fragment) OS=Solanum tuberosum PE=1 SV=1	PREDICTED: ribulose-phosphate 3-epimerase, chloroplastic-like isoform 1 [Solanum lycopersicum]
c36309.graph_c0	265.729	94.1614	2.9976e-15	-1.56062	down	Translation, ribosomal structure and biogenesis	Cellular Component: plastid small ribosomal subunit (GO:0000312);; Molecular Function: structural constituent of ribosome (GO:0003735);; Biological Process: translation (GO:0006412);; Cellular Component: chloroplast stroma (GO:0009570);; Cellular Component: chloroplast envelope (GO:0009941);; Cellular Component: membrane (GO:0016020);; Molecular Function: rRNA binding (GO:0019843);; Cellular Comp…	K02996|1e-106|rcu:RCOM_1593360|ribosomal protein S9, putative	30S ribosomal protein S9, chloroplastic (Fragment) OS=Spinacia oleracea GN=PRPS9 PE=1 SV=1	ribosomal protein S9, putative [Ricinus communis]
c42494.graph_c0	5.3648	2.39655	0.00185596	-1.20973	down	--	Molecular Function: cysteine-type peptidase activity (GO:0008234);; Cellular Component: apoplast (GO:0048046);;	--	Metacaspase-9 OS=Arabidopsis thaliana GN=AMC9 PE=1 SV=1	PREDICTED: LOW QUALITY PROTEIN: metacaspase-9-like [Cucumis sativus]
c35764.graph_c0	46.8856	23.2841	1.8922e-06	-1.07351	down	--	--	--	--	hypothetical protein PRUPE_ppa005997mg [Prunus persica]
c31828.graph_c1	70.8611	27.6664	3.00543e-08	-1.41356	down	--	Biological Process: rRNA processing (GO:0006364);; Cellular Component: photosystem II (GO:0009523);; Cellular Component: chloroplast thylakoid membrane (GO:0009535);; Biological Process: plastid organization (GO:0009657);; Biological Process: photosystem II assembly (GO:0010207);; Biological Process: photosystem II stabilization (GO:0042549);;	K02721|4e-25|ath:AT2G30570|PSBW	Photosystem II reaction center W protein, chloroplastic OS=Arabidopsis thaliana GN=PSBW PE=1 SV=2	component of 6.1 kDa polypeptide of photosystem II reaction center [Brassica rapa]
c32858.graph_c0	3.94718	0.409751	0.00167231	-2.8586	down	General function prediction only	Molecular Function: catalytic activity (GO:0003824);; Cellular Component: nucleus (GO:0005634);; Cellular Component: cytosol (GO:0005829);; Biological Process: ion transport (GO:0006811);; Biological Process: response to hormone (GO:0009725);; Biological Process: response to oxygen-containing compound (GO:1901700);;	K06966|2e-36|ppp:PHYPADRAFT_131934|hypothetical protein	Cytokinin riboside 5&apos;-monophosphate phosphoribohydrolase LOG5 OS=Arabidopsis thaliana GN=LOG5 PE=1 SV=1	predicted protein [Physcomitrella patens subsp. patens]
c14324.graph_c0	1368.19	621.445	2.58284e-08	-1.20313	down	--	Biological Process: rRNA processing (GO:0006364);; Cellular Component: chloroplast thylakoid membrane (GO:0009535);; Cellular Component: photosystem I reaction center (GO:0009538);; Biological Process: plastid organization (GO:0009657);; Cellular Component: chloroplast envelope (GO:0009941);; Biological Process: photosystem II assembly (GO:0010207);; Cellular Component: plastoglobule (GO:0010287)…	K02699|1e-131|rcu:RCOM_1628230|Photosystem I reaction center subunit XI, chloroplast precursor, putative	Photosystem I reaction center subunit XI, chloroplastic OS=Arabidopsis thaliana GN=PSAL PE=1 SV=2	PREDICTED: photosystem I reaction center subunit XI, chloroplastic-like [Solanum lycopersicum]
c16792.graph_c0	5.06047	0.196015	5.17364e-14	-4.24154	down	Translation, ribosomal structure and biogenesis	Molecular Function: RNA binding (GO:0003723);; Cellular Component: extracellular space (GO:0005615);; Cellular Component: cell wall (GO:0005618);; Cellular Component: plasma membrane (GO:0005886);; Biological Process: aging (GO:0007568);; Biological Process: response to wounding (GO:0009611);; Biological Process: response to salt stress (GO:0009651);; Biological Process: anthocyanin-containing co…	K01166|1e-126|rcu:RCOM_0836480|ribonuclease t2, putative (EC:3.1.27.1)	Extracellular ribonuclease LE OS=Solanum lycopersicum PE=1 SV=2	RNase NE [Nicotiana alata]
c38649.graph_c1	4.63119	2.1613	0.00127119	-1.1511	down	--	--	--	110 kDa antigen (Fragment) OS=Plasmodium knowlesi PE=2 SV=1	PREDICTED: uncharacterized protein LOC101207436 [Cucumis sativus]
c42883.graph_c0	3.37599	1.21413	0.000339158	-1.50624	down	--	--	--	--	PREDICTED: uncharacterized protein LOC101266475 [Solanum lycopersicum]
c27275.graph_c0	181.645	80.2458	2.8207e-09	-1.24278	down	Coenzyme transport and metabolism	Molecular Function: uroporphyrinogen decarboxylase activity (GO:0004853);; Biological Process: protoporphyrinogen IX biosynthetic process (GO:0006782);; Cellular Component: chloroplast stroma (GO:0009570);; Cellular Component: chloroplast envelope (GO:0009941);; Biological Process: chlorophyll biosynthetic process (GO:0015995);;	K01599|0.0|rcu:RCOM_0689410|uroporphyrinogen decarboxylase, putative (EC:4.1.1.37)	Uroporphyrinogen decarboxylase, chloroplastic OS=Nicotiana tabacum GN=DCUP PE=1 SV=1	PREDICTED: uroporphyrinogen decarboxylase, chloroplastic-like [Solanum lycopersicum]
c27436.graph_c1	1.77008	0.235576	0.00335839	-2.61451	down	General function prediction only	Biological Process: response to hypoxia (GO:0001666);; Biological Process: sucrose biosynthetic process (GO:0005986);; Biological Process: galactolipid biosynthetic process (GO:0019375);; Molecular Function: sucrose-phosphate synthase activity (GO:0046524);; Molecular Function: glutamine N-phenylacetyltransferase activity (GO:0047947);;	K00696|1e-122|vvi:100262385|hypothetical protein LOC100262385	Probable sucrose-phosphate synthase 2 OS=Craterostigma plantagineum GN=SPS2 PE=2 SV=1	RecName: Full=Probable sucrose-phosphate synthase 2; AltName: Full=UDP-glucose-fructose-phosphate glucosyltransferase 2
c18307.graph_c0	6.61419	0	0	-6.21403	down	--	Molecular Function: transferase activity, transferring glycosyl groups (GO:0016757);;	--	UDP-glycosyltransferase 85A2 OS=Arabidopsis thaliana GN=UGT85A2 PE=2 SV=1	hypothetical protein M569_14056, partial [Genlisea aurea]
c36340.graph_c0	368.638	179.067	6.61018e-07	-1.1062	down	Translation, ribosomal structure and biogenesis	Biological Process: very long-chain fatty acid metabolic process (GO:0000038);; Molecular Function: translation elongation factor activity (GO:0003746);; Molecular Function: GTPase activity (GO:0003924);; Molecular Function: GTP binding (GO:0005525);; Cellular Component: nucleolus (GO:0005730);; Biological Process: GTP catabolic process (GO:0006184);; Biological Process: translational elongation …	K02358|0.0|vvi:100244975|similar to Elongation factor Tu, chloroplastic	Elongation factor TuB, chloroplastic OS=Nicotiana sylvestris GN=TUFB PE=1 SV=1	RecName: Full=Elongation factor TuB, chloroplastic; Short=EF-TuB; Flags: Precursor
c40150.graph_c1	3.00902	0.433837	3.20283e-06	-2.66646	down	--	--	--	--	PREDICTED: uncharacterized protein LOC101759474 [Setaria italica]
c23883.graph_c0	2.71903	0.336023	6.33963e-06	-2.82558	down	--	Molecular Function: protein serine/threonine kinase activity (GO:0004674);; Molecular Function: ATP binding (GO:0005524);; Biological Process: protein phosphorylation (GO:0006468);; Biological Process: abscisic acid-activated signaling pathway (GO:0009738);;	K14498|2e-86|pop:POPTR_931343|hypothetical protein	Serine/threonine-protein kinase SAPK5 OS=Oryza sativa subsp. japonica GN=SAPK5 PE=2 SV=1	serine/threonine protein kinase [Brassica napus]
c36823.graph_c0	6.50401	2.37737	0.00258302	-1.47552	down	--	--	--	--	ABI3 [Rosa canina]
c38046.graph_c1	215.754	95.6654	3.82264e-09	-1.23774	down	Energy production and conversion	Biological Process: polysaccharide biosynthetic process (GO:0000271);; Molecular Function: copper ion binding (GO:0005507);; Biological Process: pentose-phosphate shunt (GO:0006098);; Molecular Function: electron carrier activity (GO:0009055);; Cellular Component: chloroplast thylakoid membrane (GO:0009535);; Cellular Component: chloroplast thylakoid lumen (GO:0009543);; Cellular Component: chlor…	K02638|3e-70|rcu:RCOM_1599580|Plastocyanin A, chloroplast precursor, putative	Plastocyanin, chloroplastic OS=Solanum lycopersicum GN=PETE PE=2 SV=1	chloroplast plastocyanin precursor [Nicotiana benthamiana]
c39346.graph_c0	6.65517	3.10388	0.00584677	-1.14787	down	--	--	--	Vegetative cell wall protein gp1 OS=Chlamydomonas reinhardtii GN=GP1 PE=2 SV=1	uncharacterized protein [Ustilago hordei]
c28040.graph_c0	4.59863	1.61475	4.43903e-09	-1.56285	down	--	Biological Process: primary metabolic process (GO:0044238);; Biological Process: organic substance metabolic process (GO:0071704);;	--	--	PREDICTED: aspartic proteinase-like protein 2-like [Solanum lycopersicum]
c36283.graph_c0	20.993	4.38235	0	-2.31236	down	Secondary metabolites biosynthesis, transport and catabolism	Molecular Function: binding (GO:0005488);; Molecular Function: oxidoreductase activity (GO:0016491);;	--	Secologanin synthase OS=Catharanthus roseus GN=CYP72A1 PE=2 SV=1	CYP72A57 [Nicotiana tabacum]
c28210.graph_c0	16.8455	4.65081	1.34946e-10	-1.89784	down	--	Biological Process: glycerol ether metabolic process (GO:0006662);; Molecular Function: electron carrier activity (GO:0009055);; Molecular Function: protein disulfide oxidoreductase activity (GO:0015035);; Biological Process: cell redox homeostasis (GO:0045454);;	--	Thioredoxin-like protein CXXS1 OS=Arabidopsis thaliana GN=CXXS1 PE=2 SV=2	hypothetical protein VITISV_028756 [Vitis vinifera]
c37775.graph_c0	35.2001	14.2341	6.7498e-11	-1.36922	down	General function prediction only	Molecular Function: magnesium ion binding (GO:0000287);; Molecular Function: GTPase activity (GO:0003924);; Molecular Function: GTP binding (GO:0005525);; Biological Process: GTP catabolic process (GO:0006184);; Biological Process: rRNA processing (GO:0006364);; Biological Process: response to light stimulus (GO:0009416);; Cellular Component: chloroplast stroma (GO:0009570);; Biological Process: …	--	GTPase obg OS=Symbiobacterium thermophilum (strain T / IAM 14863) GN=obg PE=3 SV=1	PREDICTED: GTPase obg-like [Solanum lycopersicum]
c24584.graph_c0	359.019	134.384	8.55982e-14	-1.48208	down	Carbohydrate transport and metabolism	Molecular Function: glyceraldehyde-3-phosphate dehydrogenase (NAD+) (phosphorylating) activity (GO:0004365);; Biological Process: glycolysis (GO:0006096);; Biological Process: pentose-phosphate shunt (GO:0006098);; Biological Process: rRNA processing (GO:0006364);; Biological Process: unsaturated fatty acid biosynthetic process (GO:0006636);; Biological Process: response to cold (GO:0009409);; Ce…	K05298|0.0|vvi:100259814|hypothetical protein LOC100259814	Glyceraldehyde-3-phosphate dehydrogenase B, chloroplastic OS=Pisum sativum GN=GAPB PE=1 SV=2	glyceraldehyde-3-phosphate dehydrogenase B [Scoparia dulcis]
c42259.graph_c0	11.0519	4.99186	0.00359786	-1.1928	down	--	--	--	Putative RING-H2 finger protein ATL53 OS=Arabidopsis thaliana GN=ATL53 PE=3 SV=2	RING/U-box superfamily protein, putative [Theobroma cacao]
c41014.graph_c0	56.7734	24.5769	4.82248e-09	-1.27067	down	Nucleotide transport and metabolism	Biological Process: pyrimidine nucleotide biosynthetic process (GO:0006221);; Biological Process: rRNA processing (GO:0006364);; Biological Process: tRNA metabolic process (GO:0006399);; Biological Process: aromatic amino acid family biosynthetic process (GO:0009073);; Cellular Component: chloroplast (GO:0009507);; Biological Process: chloroplast organization (GO:0009658);; Biological Process: em…	K09903|1e-162|rcu:RCOM_1460080|Uridylate kinase, putative	Uridylate kinase OS=Synechococcus sp. (strain JA-3-3Ab) GN=pyrH PE=3 SV=1	Uridylate kinase, putative [Ricinus communis]
c15250.graph_c0	3.19831	0.436859	1.22e-07	-2.76265	down	Carbohydrate transport and metabolism	Molecular Function: hydrolase activity, hydrolyzing O-glycosyl compounds (GO:0004553);; Cellular Component: cell wall (GO:0005618);; Cellular Component: integral component of plasma membrane (GO:0005887);; Biological Process: cellular glucan metabolic process (GO:0006073);; Biological Process: plant-type cell wall modification involved in multidimensional cell growth (GO:0009831);; Molecular Func…	K08235|1e-154|vvi:100245071|hypothetical protein LOC100245071	Probable xyloglucan endotransglucosylase/hydrolase protein 33 OS=Arabidopsis thaliana GN=XTH33 PE=2 SV=2	PREDICTED: probable xyloglucan endotransglucosylase/hydrolase protein 33-like [Solanum lycopersicum]
c31786.graph_c0	18.9994	8.56822	9.42206e-06	-1.2066	down	Posttranslational modification, protein turnover, chaperones	Biological Process: rRNA processing (GO:0006364);; Biological Process: tRNA metabolic process (GO:0006399);; Biological Process: protein folding (GO:0006457);; Biological Process: aromatic amino acid family biosynthetic process (GO:0009073);; Cellular Component: chloroplast stroma (GO:0009570);; Biological Process: chloroplast organization (GO:0009658);; Biological Process: photosystem II assembl…	--	Trigger factor OS=Synechococcus sp. (strain ATCC 27264 / PCC 7002 / PR-6) GN=tig PE=3 SV=1	hypothetical protein [Camellia sinensis]
c33962.graph_c1	18.1147	2.40488	0	-2.92409	down	Posttranslational modification, protein turnover, chaperones	--	K13993|7e-59|vvi:100267696|hypothetical protein LOC100267696	Small heat shock protein C4 OS=Rickettsia felis (strain ATCC VR-1525 / URRWXCal2) GN=hspc4-1 PE=3 SV=1	PREDICTED: uncharacterized protein LOC100267696 [Vitis vinifera]
c29779.graph_c0	36.3833	14.1828	2.09283e-09	-1.41822	down	--	Biological Process: pentose-phosphate shunt (GO:0006098);; Biological Process: photosynthetic electron transport in photosystem I (GO:0009773);; Biological Process: cellular cation homeostasis (GO:0030003);; Cellular Component: thylakoid membrane (GO:0042651);; Biological Process: divalent metal ion transport (GO:0070838);;	--	NAD(P)H-quinone oxidoreductase subunit L OS=Cyanothece sp. (strain ATCC 51142) GN=ndhL PE=3 SV=1	conserved hypothetical protein [Ricinus communis]
c25801.graph_c0	124.716	55.9295	6.50314e-09	-1.22124	down	--	Molecular Function: RNA binding (GO:0003723);; Molecular Function: ATP binding (GO:0005524);; Cellular Component: nucleus (GO:0005634);; Molecular Function: ATP-dependent helicase activity (GO:0008026);; Molecular Function: zinc ion binding (GO:0008270);; Cellular Component: chloroplast stroma (GO:0009570);; Biological Process: embryo development ending in seed dormancy (GO:0009793);; Cellular Co…	--	DEAD-box ATP-dependent RNA helicase 3, chloroplastic OS=Arabidopsis thaliana GN=RH3 PE=1 SV=2	hypothetical protein M569_08688 [Genlisea aurea]
c15832.graph_c0	17.8098	8.80385	0.000390962	-1.07401	down	--	Cellular Component: extracellular region (GO:0005576);;	--	Uncharacterized protein At5g01610 OS=Arabidopsis thaliana GN=At5g01610 PE=1 SV=1	PREDICTED: uncharacterized protein LOC101243740 [Solanum lycopersicum]
c38021.graph_c1	961.494	197.964	0	-2.344	down	--	Molecular Function: hydrolase activity, acting on ester bonds (GO:0016788);; Biological Process: organic substance metabolic process (GO:0071704);;	--	Acetylajmalan esterase OS=Rauvolfia serpentina GN=AAE PE=1 SV=1	acetylajmalan acetylesterase [Striga asiatica]
c14505.graph_c0	43.2231	21.0231	1.3482e-05	-1.10076	down	Posttranslational modification, protein turnover, chaperones	Molecular Function: peptide-methionine (S)-S-oxide reductase activity (GO:0008113);; Cellular Component: chloroplast stroma (GO:0009570);; Biological Process: cellular response to oxidative stress (GO:0034599);; Biological Process: oxidation-reduction process (GO:0055114);; Biological Process: response to karrikin (GO:0080167);;	K07304|1e-109|vvi:100258013|hypothetical protein LOC100258013	Peptide methionine sulfoxide reductase OS=Lactuca sativa PE=2 SV=1	PREDICTED: peptide methionine sulfoxide reductase-like [Solanum lycopersicum]
c32017.graph_c0	17.2581	6.71305	4.68685e-09	-1.42053	down	--	Molecular Function: fatty acid binding (GO:0005504);; Biological Process: fatty acid metabolic process (GO:0006631);; Cellular Component: chloroplast stroma (GO:0009570);; Biological Process: flavonoid biosynthetic process (GO:0009813);; Molecular Function: chalcone isomerase activity (GO:0045430);;	--	Fatty-acid-binding protein 3 OS=Arabidopsis thaliana GN=FAP3 PE=1 SV=1	PREDICTED: chalcone--flavonone isomerase-like [Solanum lycopersicum]
c28605.graph_c0	21.1761	8.39946	1.12786e-06	-1.38728	down	--	Biological Process: maltose metabolic process (GO:0000023);; Cellular Component: chloroplast (GO:0009507);; Biological Process: thylakoid membrane organization (GO:0010027);; Biological Process: starch biosynthetic process (GO:0019252);;	--	--	PREDICTED: uncharacterized protein LOC100258439 [Vitis vinifera]
c32665.graph_c0	16.1045	5.0536	7.74085e-06	-1.70065	down	--	Molecular Function: sequence-specific DNA binding transcription factor activity (GO:0003700);; Cellular Component: nucleus (GO:0005634);; Cellular Component: cytosol (GO:0005829);; Biological Process: regulation of transcription, DNA-templated (GO:0006355);; Biological Process: response to light stimulus (GO:0009416);; Biological Process: detection of cytokinin stimulus (GO:0009722);; Molecular F…	--	Homeobox protein knotted-1-like LET12 OS=Solanum lycopersicum GN=LET12 PE=2 SV=1	hypothetical protein M569_03005 [Genlisea aurea]
c36268.graph_c0	4.54138	0.590771	3.33067e-16	-2.92473	down	Carbohydrate transport and metabolism	Molecular Function: sucrose alpha-glucosidase activity (GO:0004575);; Biological Process: sucrose biosynthetic process (GO:0005986);; Molecular Function: levanase activity (GO:0031219);; Molecular Function: inulinase activity (GO:0051670);;	K01193|0.0|pop:POPTR_561648|hypothetical protein	Beta-fructofuranosidase, insoluble isoenzyme CWINV1 OS=Arabidopsis thaliana GN=CWINV1 PE=1 SV=1	Glycosyl hydrolases family 32 protein, putative [Theobroma cacao]
c37830.graph_c0	268.515	123.755	6.1098e-08	-1.18209	down	Carbohydrate transport and metabolism	Molecular Function: magnesium ion binding (GO:0000287);; Molecular Function: monooxygenase activity (GO:0004497);; Molecular Function: ATP binding (GO:0005524);; Cellular Component: chloroplast thylakoid membrane (GO:0009535);; Biological Process: photorespiration (GO:0009853);; Biological Process: ATP hydrolysis coupled proton transport (GO:0015991);; Molecular Function: ribulose-bisphosphate ca…	K02112|0.0|vvi:4025008|atpB	Ribulose bisphosphate carboxylase large chain OS=Digitalis purpurea GN=rbcL PE=3 SV=2	ribulose 1,5-bisphosphate carboxylase/oxygenase large subunit protein [Antirrhinum majus]
c28873.graph_c0	30.2667	10.4732	2.95319e-14	-1.59275	down	Signal transduction mechanisms	Biological Process: cellular process (GO:0009987);;	--	Two-component response regulator-like APRR1 OS=Arabidopsis thaliana GN=APRR1 PE=1 SV=1	timing of cab expression 1/pseudo-response regulator 1 [Nicotiana attenuata]
c33143.graph_c0	132.758	42.7226	0	-1.69802	down	--	Molecular Function: heat shock protein binding (GO:0031072);; Molecular Function: unfolded protein binding (GO:0051082);;	--	--	PREDICTED: uncharacterized protein LOC100788324 [Glycine max]
c25735.graph_c0	6.40505	2.35998	0.000103197	-1.47812	down	--	Biological Process: leaf morphogenesis (GO:0009965);; Biological Process: cell differentiation (GO:0030154);; Biological Process: cellular metabolic process (GO:0044237);; Biological Process: positive regulation of development, heterochronic (GO:0045962);; Biological Process: organic substance metabolic process (GO:0071704);;	--	Transcription factor TCP17 OS=Arabidopsis thaliana GN=TCP17 PE=2 SV=1	PREDICTED: transcription factor TCP13 [Vitis vinifera]
c28433.graph_c0	5.10906	0.164914	0	-4.68427	down	Secondary metabolites biosynthesis, transport and catabolism	Molecular Function: iron ion binding (GO:0005506);; Cellular Component: endoplasmic reticulum membrane (GO:0005789);; Molecular Function: electron carrier activity (GO:0009055);; Cellular Component: integral component of membrane (GO:0016021);; Biological Process: monoterpenoid biosynthetic process (GO:0016099);; Molecular Function: oxidoreductase activity, acting on paired donors, with incorpora…	--	Geraniol 8-hydroxylase OS=Catharanthus roseus GN=CYP76B6 PE=1 SV=1	geraniol 10-hydroxylase [Picrorhiza kurrooa]
c39089.graph_c0	4.79413	1.38242	3.12656e-05	-1.80606	down	--	--	--	--	PREDICTED: uncharacterized protein LOC100854636 [Vitis vinifera]
c15890.graph_c0	21.6698	9.49164	1.73445e-08	-1.25325	down	--	Cellular Component: chloroplast (GO:0009507);; Biological Process: embryo development ending in seed dormancy (GO:0009793);; Biological Process: suspensor development (GO:0010098);;	--	Pentatricopeptide repeat-containing protein At1g30610, chloroplastic OS=Arabidopsis thaliana GN=EMB2279 PE=2 SV=1	PREDICTED: pentatricopeptide repeat-containing protein At1g30610, chloroplastic-like [Solanum lycopersicum]
c32815.graph_c0	5.94934	2.02745	5.05071e-05	-1.58472	down	--	Biological Process: metabolic process (GO:0008152);; Cellular Component: plastid (GO:0009536);; Molecular Function: transferase activity (GO:0016740);;	--	Methyltransferase-like protein 7A OS=Homo sapiens GN=METTL7A PE=1 SV=1	PREDICTED: methyltransferase-like protein 7B-like [Solanum lycopersicum]
c43962.graph_c0	2.10588	0.0628187	8.61644e-13	-4.4136	down	--	--	--	Vinorine synthase OS=Rauvolfia serpentina GN=ACT PE=1 SV=2	Anthranilate N-benzoyltransferase protein, putative [Theobroma cacao]
c27132.graph_c0	11.2158	3.36692	1.66783e-11	-1.78586	down	Transcription	Biological Process: maltose metabolic process (GO:0000023);; Molecular Function: plastid sigma factor activity (GO:0001053);; Molecular Function: DNA binding (GO:0003677);; Molecular Function: sequence-specific DNA binding transcription factor activity (GO:0003700);; Molecular Function: DNA-directed RNA polymerase activity (GO:0003899);; Biological Process: pentose-phosphate shunt (GO:0006098);; …	--	RNA polymerase sigma factor sigD, chloroplastic OS=Arabidopsis thaliana GN=SIGD PE=2 SV=1	PREDICTED: RNA polymerase sigma factor rpoD-like [Vitis vinifera]
c34228.graph_c0	10.8678	0.739435	1.22125e-15	-3.70513	down	--	Biological Process: metabolic process (GO:0008152);; Molecular Function: oxidoreductase activity (GO:0016491);;	--	Dihydroflavonol-4-reductase OS=Hordeum vulgare GN=ANT18 PE=3 SV=1	predicted protein [Populus trichocarpa]
c33659.graph_c0	2.72636	0.75341	3.86537e-05	-1.85988	down	Replication, recombination and repair	Biological Process: immune effector process (GO:0002252);; Biological Process: base-excision repair (GO:0006284);; Molecular Function: DNA-3-methyladenine glycosylase activity (GO:0008725);; Cellular Component: plastid (GO:0009536);; Biological Process: detection of biotic stimulus (GO:0009595);; Biological Process: response to external stimulus (GO:0009605);; Biological Process: response to bact…	--	Probable WRKY transcription factor 40 OS=Arabidopsis thaliana GN=WRKY40 PE=1 SV=1	PREDICTED: probable WRKY transcription factor 40-like [Fragaria vesca subsp. vesca]
c31211.graph_c0	14.6209	3.84779	4.10783e-15	-1.97624	down	--	Cellular Component: membrane (GO:0016020);;	--	WAT1-related protein At5g40240 OS=Arabidopsis thaliana GN=At5g40240 PE=2 SV=1	PREDICTED: auxin-induced protein 5NG4-like [Glycine max]
c30473.graph_c0	242.127	90.8081	1.0314e-13	-1.47903	down	Energy production and conversion	Biological Process: MAPK cascade (GO:0000165);; Biological Process: pentose-phosphate shunt (GO:0006098);; Biological Process: rRNA processing (GO:0006364);; Biological Process: protein targeting to membrane (GO:0006612);; Biological Process: response to cold (GO:0009409);; Cellular Component: chloroplast thylakoid membrane (GO:0009535);; Biological Process: detection of biotic stimulus (GO:00095…	K02113|4e-96|pop:POPTR_740620|hypothetical protein	ATP synthase delta chain, chloroplastic OS=Nicotiana tabacum GN=ATPD PE=2 SV=1	PREDICTED: ATP synthase delta chain, chloroplastic-like [Solanum lycopersicum]
c26846.graph_c0	14.3513	0.122515	0	-6.40477	down	--	Molecular Function: oxidoreductase activity (GO:0016491);;	--	Transcription factor bHLH18 OS=Arabidopsis thaliana GN=BHLH18 PE=2 SV=1	Basic helix-loop-helix DNA-binding superfamily protein, putative [Theobroma cacao]
c36998.graph_c0	30.119	10.1129	3.69704e-14	-1.63493	down	Energy production and conversion	Biological Process: sulfur amino acid metabolic process (GO:0000096);; Molecular Function: aldo-keto reductase (NADP) activity (GO:0004033);; Biological Process: pentose-phosphate shunt (GO:0006098);; Biological Process: glycine catabolic process (GO:0006546);; Biological Process: unsaturated fatty acid biosynthetic process (GO:0006636);; Biological Process: vitamin metabolic process (GO:0006766)…	--	Uncharacterized oxidoreductase At1g06690, chloroplastic OS=Arabidopsis thaliana GN=At1g06690 PE=1 SV=1	NAD(P)-linked oxidoreductase superfamily protein isoform 1 [Theobroma cacao]
c32178.graph_c1	1163.96	458.014	2.5161e-12	-1.41001	down	--	--	--	Late embryogenesis abundant protein 2 OS=Cicer arietinum PE=1 SV=1	PREDICTED: late embryogenesis abundant protein 2-like [Cicer arietinum]
c38560.graph_c0	2.15221	0.0723036	0	-4.55534	down	--	--	--	Retrovirus-related Pol polyprotein LINE-1 OS=Mus musculus GN=Pol PE=1 SV=2	hypothetical protein [Beta vulgaris subsp. vulgaris]
c44702.graph_c0	1.799	0	0.000382451	-4.16745	down	--	--	--	--	predicted protein [Populus trichocarpa]
c37779.graph_c1	28.0732	13.6994	5.93235e-06	-1.09695	down	--	Cellular Component: nucleus (GO:0005634);; Biological Process: rRNA processing (GO:0006364);; Cellular Component: chloroplast outer membrane (GO:0009707);; Biological Process: chloroplast relocation (GO:0009902);; Biological Process: thylakoid membrane organization (GO:0010027);; Biological Process: photosystem II assembly (GO:0010207);; Biological Process: regulation of protein dephosphorylation…	--	Protein CHUP1, chloroplastic OS=Arabidopsis thaliana GN=CHUP1 PE=1 SV=1	unnamed protein product [Vitis vinifera]
c33526.graph_c0	58.3239	21.9413	7.27529e-12	-1.47208	down	--	Biological Process: pentose-phosphate shunt (GO:0006098);; Biological Process: rRNA processing (GO:0006364);; Biological Process: unsaturated fatty acid biosynthetic process (GO:0006636);; Biological Process: response to cold (GO:0009409);; Cellular Component: chloroplast thylakoid membrane (GO:0009535);; Cellular Component: chloroplast thylakoid lumen (GO:0009543);; Cellular Component: chloropla…	--	Thylakoid lumenal 16.5 kDa protein, chloroplastic OS=Arabidopsis thaliana GN=At4g02530 PE=1 SV=3	PREDICTED: thylakoid lumenal 16.5 kDa protein, chloroplastic isoform 1 [Vitis vinifera]
c41258.graph_c0	46.1034	23.903	1.61359e-05	-1.01124	down	Transcription	Molecular Function: RNA binding (GO:0003723);; Molecular Function: ribonuclease III activity (GO:0004525);; Cellular Component: chloroplast (GO:0009507);; Biological Process: thylakoid membrane organization (GO:0010027);; Biological Process: production of ta-siRNAs involved in RNA interference (GO:0010267);; Biological Process: rRNA catabolic process (GO:0016075);; Biological Process: isopentenyl…	--	Ribonuclease 3 OS=Geobacillus kaustophilus (strain HTA426) GN=rnc PE=3 SV=1	PREDICTED: uncharacterized protein LOC101253437 [Solanum lycopersicum]
c27430.graph_c0	10658.9	3709.56	4.77396e-15	-1.58738	down	--	Molecular Function: hydrolase activity, acting on ester bonds (GO:0016788);;	--	Acetylajmalan esterase OS=Rauvolfia serpentina GN=AAE PE=1 SV=1	acetylajmalan acetylesterase [Striga asiatica]
c33155.graph_c0	7.8247	2.21292	0.00130041	-1.80694	down	--	--	--	GDSL esterase/lipase At5g03980 OS=Arabidopsis thaliana GN=At5g03980 PE=2 SV=1	acetylajmalan acetylesterase [Striga asiatica]
c32505.graph_c0	9.2298	0.57488	0	-3.88034	down	--	Cellular Component: chloroplast (GO:0009507);; Cellular Component: membrane (GO:0016020);;	--	--	PREDICTED: uncharacterized protein LOC100250842 [Vitis vinifera]
c36281.graph_c0	13.061	5.47464	1.94893e-05	-1.30676	down	--	Cellular Component: cytoplasm (GO:0005737);;	--	Uncharacterized serine-rich protein C215.13 OS=Schizosaccharomyces pombe (strain 972 / ATCC 24843) GN=SPBC215.13 PE=1 SV=1	conserved hypothetical protein [Ricinus communis]
c17109.graph_c0	17.235	6.91045	1.38249e-07	-1.37495	down	Posttranslational modification, protein turnover, chaperones	Biological Process: protein peptidyl-prolyl isomerization (GO:0000413);; Molecular Function: peptidyl-prolyl cis-trans isomerase activity (GO:0003755);; Biological Process: protein folding (GO:0006457);; Cellular Component: chloroplast thylakoid lumen (GO:0009543);; Biological Process: mRNA modification (GO:0016556);; Biological Process: isopentenyl diphosphate biosynthetic process, methylerythri…	--	Peptidyl-prolyl cis-trans isomerase B OS=Orpinomyces sp. (strain PC-2) GN=CYPB PE=1 SV=1	peptidyl-prolyl cis-trans isomerase B, ppib, putative [Ricinus communis]
c35542.graph_c1	2.1129	0.412732	0.00554281	-2.21674	down	--	Molecular Function: ferric-chelate reductase activity (GO:0000293);; Cellular Component: integral component of membrane (GO:0016021);; Biological Process: oxidation-reduction process (GO:0055114);;	--	Ferric reduction oxidase 4 OS=Arabidopsis thaliana GN=FRO4 PE=2 SV=1	Fe(III)-chelate reductase [Citrus junos]
c25907.graph_c0	6.47731	1.56704	5.07545e-09	-2.06764	down	Amino acid transport and metabolism	Molecular Function: nucleotide binding (GO:0000166);; Biological Process: cellular amino acid biosynthetic process (GO:0008652);; Cellular Component: plastid (GO:0009536);; Molecular Function: kinase activity (GO:0016301);; Biological Process: phosphorylation (GO:0016310);; Molecular Function: ion binding (GO:0043167);;	K00891|1e-94|vvi:100262762|shikimate kinase	Shikimate kinase, chloroplastic OS=Solanum lycopersicum GN=SK PE=1 SV=1	shikimate kinase, partial [Ipomoea purpurea]
c37920.graph_c1	75.8792	37.9379	2.34127e-06	-1.06391	down	General function prediction only	Cellular Component: plastid chromosome (GO:0009508);; Cellular Component: chloroplast stroma (GO:0009570);;	--	COBW domain-containing protein 2 OS=Homo sapiens GN=CBWD2 PE=1 SV=1	PREDICTED: COBW domain-containing protein 1-like [Fragaria vesca subsp. vesca]
c40332.graph_c0	559.635	224.136	7.27407e-12	-1.38444	down	--	Cellular Component: photosystem I (GO:0009522);; Cellular Component: chloroplast thylakoid membrane (GO:0009535);; Biological Process: photosynthesis (GO:0015979);; Molecular Function: chlorophyll binding (GO:0016168);; Biological Process: cysteine biosynthetic process (GO:0019344);; Biological Process: cellular cation homeostasis (GO:0030003);; Biological Process: divalent metal ion transport (G…	K02698|4e-68|rcu:RCOM_1091900|Photosystem I reaction center subunit psaK, chloroplast precursor, putative	Photosystem I reaction center subunit psaK, chloroplastic OS=Arabidopsis thaliana GN=PSAK PE=2 SV=2	photosystem I reaction center subunit X psaK [Nicotiana tabacum]
c30718.graph_c0	1367.74	642.982	1.59398e-07	-1.15349	down	Energy production and conversion	Molecular Function: electron carrier activity (GO:0009055);; Cellular Component: chloroplast (GO:0009507);; Biological Process: electron transport chain (GO:0022900);; Molecular Function: metal ion binding (GO:0046872);; Molecular Function: 2 iron, 2 sulfur cluster binding (GO:0051537);;	K02639|1e-56|vvi:100249080|hypothetical protein LOC100249080	Ferredoxin, chloroplastic OS=Capsicum annuum GN=AP1 PE=1 SV=1	RecName: Full=Ferredoxin, chloroplastic; AltName: Full=PFLP; Flags: Precursor
c30017.graph_c0	30.9179	9.99309	7.63833e-13	-1.6862	down	--	Biological Process: pentose-phosphate shunt (GO:0006098);; Cellular Component: chloroplast (GO:0009507);; Biological Process: thylakoid membrane organization (GO:0010027);; Biological Process: myo-inositol hexakisphosphate biosynthetic process (GO:0010264);;	--	--	PREDICTED: uncharacterized protein LOC101244674 [Solanum lycopersicum]
c14311.graph_c0	119.66	52.1579	5.72798e-09	-1.26089	down	--	Biological Process: cellular aromatic compound metabolic process (GO:0006725);; Biological Process: response to light stimulus (GO:0009416);; Biological Process: cellular nitrogen compound metabolic process (GO:0034641);; Biological Process: primary metabolic process (GO:0044238);; Biological Process: single-organism metabolic process (GO:0044710);; Biological Process: heterocycle metabolic proce…	--	Stress enhanced protein 1, chloroplastic OS=Arabidopsis thaliana GN=SEP1 PE=2 SV=1	Stress enhanced protein 1, putative [Theobroma cacao]
c34707.graph_c0	14.0887	3.72732	1.11022e-16	-1.97148	down	--	Molecular Function: nucleotide binding (GO:0000166);; Molecular Function: protein kinase activity (GO:0004672);; Cellular Component: plasma membrane (GO:0005886);; Biological Process: phosphorylation (GO:0016310);;	--	Receptor-like serine/threonine-protein kinase ALE2 OS=Arabidopsis thaliana GN=ALE2 PE=1 SV=1	PREDICTED: receptor-like serine/threonine-protein kinase ALE2-like [Solanum lycopersicum]
c25518.graph_c0	33.5636	12.2979	1.39555e-13	-1.51144	down	Translation, ribosomal structure and biogenesis	Molecular Function: tRNA binding (GO:0000049);; Molecular Function: alanine-tRNA ligase activity (GO:0004813);; Molecular Function: ATP binding (GO:0005524);; Cellular Component: mitochondrion (GO:0005739);; Biological Process: alanyl-tRNA aminoacylation (GO:0006419);; Molecular Function: zinc ion binding (GO:0008270);; Cellular Component: chloroplast stroma (GO:0009570);; Biological Process: emb…	K01872|0.0|vvi:100255425|hypothetical protein LOC100255425	Probable alanine--tRNA ligase, chloroplastic OS=Populus trichocarpa GN=POPTRDRAFT_821063 PE=3 SV=1	PREDICTED: probable alanyl-tRNA synthetase, chloroplastic [Vitis vinifera]
c33835.graph_c0	3.86941	0.264262	1.35447e-13	-3.66433	down	--	Cellular Component: extracellular region (GO:0005576);; Biological Process: lipid metabolic process (GO:0006629);; Molecular Function: lipase activity (GO:0016298);;	--	GDSL esterase/lipase EXL3 OS=Arabidopsis thaliana GN=EXL3 PE=2 SV=1	PREDICTED: uncharacterized protein LOC101250113 [Solanum lycopersicum]
c34805.graph_c0	57.3147	28.3644	1.71179e-06	-1.07846	down	--	Molecular Function: nucleotide binding (GO:0000166);; Molecular Function: sulfotransferase activity (GO:0008146);; Molecular Function: zinc ion binding (GO:0008270);; Cellular Component: chloroplast stroma (GO:0009570);; Biological Process: cellular response to phosphate starvation (GO:0016036);; Biological Process: galactolipid biosynthetic process (GO:0019375);; Biological Process: sulfolipid b…	K06118|0.0|vvi:100242408|hypothetical protein LOC100242408	UDP-sulfoquinovose synthase, chloroplastic OS=Spinacia oleracea GN=SQD1 PE=1 SV=1	UDP-sulfoquinovose synthase [Solanum lycopersicum]
c27047.graph_c0	10.9085	0	3.47933e-11	-5.30027	down	--	--	--	Dirigent protein 2 OS=Arabidopsis thaliana GN=DIR2 PE=2 SV=1	PREDICTED: disease resistance response protein 206-like [Solanum lycopersicum]
c27330.graph_c0	1217.54	144.45	0	-3.13935	down	Cell cycle control, cell division, chromosome partitioning	Molecular Function: superoxide dismutase activity (GO:0004784);; Cellular Component: cell wall (GO:0005618);; Biological Process: auxin-activated signaling pathway (GO:0009734);; Molecular Function: manganese ion binding (GO:0030145);; Molecular Function: nutrient reservoir activity (GO:0045735);; Cellular Component: apoplast (GO:0048046);; Biological Process: oxidation-reduction process (GO:0055…	--	Auxin-binding protein ABP20 OS=Prunus persica GN=ABP20 PE=2 SV=1	germin-like protein, partial [Genlisea aurea]
c41553.graph_c0	41.4044	16.0508	4.54291e-11	-1.42877	down	Function unknown	Cellular Component: mitochondrion (GO:0005739);; Biological Process: phosphatidylglycerol biosynthetic process (GO:0006655);; Biological Process: aromatic amino acid family biosynthetic process (GO:0009073);; Cellular Component: chloroplast (GO:0009507);; Biological Process: stomatal complex morphogenesis (GO:0010103);; Biological Process: iron-sulfur cluster assembly (GO:0016226);; Biological Pr…	--	Protein Iojap, chloroplastic OS=Arabidopsis thaliana GN=IJ PE=2 SV=1	PREDICTED: protein Iojap, chloroplastic-like [Solanum lycopersicum]
c32004.graph_c0	4.62705	1.53046	2.14686e-05	-1.62731	down	RNA processing and modification	Molecular Function: ribonuclease activity (GO:0004540);; Biological Process: organelle organization (GO:0006996);; Biological Process: anatomical structure development (GO:0048856);;	K12581|2e-97|pop:POPTR_639926|hypothetical protein	Probable CCR4-associated factor 1 homolog 7 OS=Arabidopsis thaliana GN=CAF1-7 PE=2 SV=2	Polynucleotidyl transferase, ribonuclease H-like superfamily protein [Theobroma cacao]
c25929.graph_c0	11.7575	2.61224	2.73115e-13	-2.20271	down	Defense mechanisms	Biological Process: drug transmembrane transport (GO:0006855);; Molecular Function: drug transmembrane transporter activity (GO:0015238);; Molecular Function: antiporter activity (GO:0015297);; Cellular Component: membrane (GO:0016020);; Cellular Component: cell part (GO:0044464);;	--	Protein TRANSPARENT TESTA 12 OS=Arabidopsis thaliana GN=TT12 PE=2 SV=1	hypothetical protein M569_06267, partial [Genlisea aurea]
c18109.graph_c1	5.20506	0	0	-6.06803	down	General function prediction only	Molecular Function: oxidoreductase activity, acting on the CH-OH group of donors, NAD or NADP as acceptor (GO:0016616);; Biological Process: single-organism metabolic process (GO:0044710);; Molecular Function: metal ion binding (GO:0046872);;	--	8-hydroxygeraniol dehydrogenase OS=Catharanthus roseus GN=10HGO PE=1 SV=1	RecName: Full=8-hydroxygeraniol dehydrogenase; Short=Cr10HGO
c29787.graph_c0	93.6054	25.1814	1.24345e-14	-1.94478	down	--	Molecular Function: structural molecule activity (GO:0005198);; Cellular Component: photosystem I (GO:0009522);; Cellular Component: photosystem II (GO:0009523);; Cellular Component: chloroplast thylakoid membrane (GO:0009535);; Biological Process: photosynthesis, light harvesting (GO:0009765);; Cellular Component: integral component of membrane (GO:0016021);; Molecular Function: chlorophyll bind…	K08914|2e-65|ath:AT5G54270|LHCB3	Chlorophyll a-b binding protein of LHCII type III, chloroplastic OS=Hordeum vulgare GN=LHBC PE=2 SV=1	AT5G54270 [Arabidopsis thaliana]
c37808.graph_c0	30.4106	11.9374	4.6531e-11	-1.41118	down	Translation, ribosomal structure and biogenesis	Biological Process: maltose metabolic process (GO:0000023);; Cellular Component: chloroplast (GO:0009507);; Biological Process: production of ta-siRNAs involved in RNA interference (GO:0010267);; Biological Process: starch biosynthetic process (GO:0019252);; Biological Process: production of miRNAs involved in gene silencing by miRNA (GO:0035196);; Biological Process: ribosome biogenesis (GO:0042…	--	Ribosome maturation factor RimM OS=Synechococcus sp. (strain CC9311) GN=rimM PE=3 SV=1	PREDICTED: uncharacterized protein LOC100251997 [Vitis vinifera]
c25403.graph_c0	10.8554	5.59956	0.000171057	-1.01584	down	--	Cellular Component: plasma membrane (GO:0005886);; Biological Process: post-embryonic morphogenesis (GO:0009886);; Molecular Function: metal ion binding (GO:0046872);; Biological Process: reproductive structure development (GO:0048608);;	--	Protein DA1-related 1 OS=Arabidopsis thaliana GN=DAR1 PE=2 SV=3	PREDICTED: protein DA1-related 1-like [Solanum lycopersicum]
c13916.graph_c1	5.17462	1.62779	0.00272281	-1.66779	down	--	--	--	Zinc finger protein ZAT4 OS=Arabidopsis thaliana GN=ZAT4 PE=2 SV=1	PREDICTED: zinc finger protein ZAT9-like [Fragaria vesca subsp. vesca]
c27638.graph_c0	202.973	73.2562	1.35447e-14	-1.53397	down	Translation, ribosomal structure and biogenesis	Molecular Function: structural constituent of ribosome (GO:0003735);; Cellular Component: nucleus (GO:0005634);; Cellular Component: ribosome (GO:0005840);; Biological Process: rRNA processing (GO:0006364);; Biological Process: translation (GO:0006412);; Biological Process: response to cold (GO:0009409);; Cellular Component: chloroplast stroma (GO:0009570);; Biological Process: embryo development…	K02888|1e-71|vvi:100255002|hypothetical protein LOC100255002	50S ribosomal protein L21, chloroplastic OS=Arabidopsis thaliana GN=RPL21 PE=2 SV=1	PREDICTED: 50S ribosomal protein L21, chloroplastic-like [Solanum lycopersicum]
c25245.graph_c0	2.13092	0	2.41641e-08	-4.92945	down	--	--	--	Putative nuclease HARBI1 OS=Homo sapiens GN=HARBI1 PE=1 SV=1	PREDICTED: uncharacterized protein LOC101260895 [Solanum lycopersicum]
c30214.graph_c0	185.607	29.7263	0	-2.70566	down	Inorganic ion transport and metabolism	Biological Process: MAPK cascade (GO:0000165);; Molecular Function: carbonate dehydratase activity (GO:0004089);; Cellular Component: cytosol (GO:0005829);; Biological Process: pentose-phosphate shunt (GO:0006098);; Biological Process: protein targeting to membrane (GO:0006612);; Molecular Function: zinc ion binding (GO:0008270);; Biological Process: response to cold (GO:0009409);; Cellular Compo…	K01673|1e-162|vvi:100249137|hypothetical protein LOC100249137	Carbonic anhydrase, chloroplastic OS=Nicotiana tabacum PE=2 SV=1	PREDICTED: carbonic anhydrase, chloroplastic [Vitis vinifera]
c14059.graph_c0	24.6991	9.93355	0.000374004	-1.35645	down	Transcription	Molecular Function: plastid sigma factor activity (GO:0001053);; Molecular Function: DNA binding (GO:0003677);; Molecular Function: sequence-specific DNA binding transcription factor activity (GO:0003700);; Molecular Function: DNA-directed RNA polymerase activity (GO:0003899);; Molecular Function: protein binding (GO:0005515);; Cellular Component: mitochondrion (GO:0005739);; Biological Process: …	--	RNA polymerase sigma factor sigB OS=Arabidopsis thaliana GN=SIGB PE=2 SV=2	PREDICTED: LOW QUALITY PROTEIN: RNA polymerase sigma factor sigB-like [Cucumis sativus]
c42153.graph_c0	11.0342	4.70108	2.66174e-07	-1.28972	down	Function unknown	Biological Process: metabolic process (GO:0008152);; Molecular Function: oxidoreductase activity (GO:0016491);;	--	Probable LRR receptor-like serine/threonine-protein kinase At1g34110 OS=Arabidopsis thaliana GN=At1g34110 PE=2 SV=2	PREDICTED: probable leucine-rich repeat receptor-like protein kinase At1g35710-like [Solanum lycopersicum]
c32788.graph_c1	3.22479	1.15879	0.00391794	-1.49531	down	--	Molecular Function: protein serine/threonine phosphatase activity (GO:0004722);; Cellular Component: nucleus (GO:0005634);; Cellular Component: cytoplasm (GO:0005737);; Biological Process: protein dephosphorylation (GO:0006470);; Cellular Component: protein serine/threonine phosphatase complex (GO:0008287);; Biological Process: response to cold (GO:0009409);; Biological Process: response to water…	--	Probable protein phosphatase 2C 27 OS=Arabidopsis thaliana GN=At2g33700 PE=2 SV=1	PREDICTED: probable protein phosphatase 2C 27-like [Solanum lycopersicum]
c39839.graph_c0	10.4865	4.42515	1.59272e-07	-1.30359	down	Cell wall/membrane/envelope biogenesis	Cellular Component: integral component of membrane (GO:0016021);; Molecular Function: cellulose synthase (UDP-forming) activity (GO:0016760);; Biological Process: cellulose biosynthetic process (GO:0030244);;	--	Cellulose synthase-like protein G3 OS=Arabidopsis thaliana GN=CSLG3 PE=2 SV=2	cellulose synthase-like protein CslG [Nicotiana tabacum]
c32221.graph_c0	66.9401	23.9759	1.94511e-13	-1.54322	down	--	Cellular Component: mitochondrion (GO:0005739);; Cellular Component: endoplasmic reticulum (GO:0005783);; Biological Process: protein targeting to membrane (GO:0006612);; Biological Process: positive regulation of flavonoid biosynthetic process (GO:0009963);; Biological Process: regulation of plant-type hypersensitive response (GO:0010363);;	--	Reticulon-like protein B8 OS=Arabidopsis thaliana GN=RTNLB8 PE=1 SV=1	predicted protein [Populus trichocarpa]
c38101.graph_c0	4.81181	2.25342	6.39503e-05	-1.15168	down	Replication, recombination and repair	Molecular Function: binding (GO:0005488);;	--	Genome polyprotein OS=Petunia vein clearing virus (isolate Shepherd) PE=3 SV=1	PREDICTED: genome polyprotein-like [Cicer arietinum]
c33779.graph_c0	48.9883	19.6491	4.66281e-10	-1.37938	down	--	Cellular Component: chloroplast envelope (GO:0009941);;	--	--	PREDICTED: uncharacterized protein LOC101264357 [Solanum lycopersicum]
c14566.graph_c0	42.229	13.7822	0	-1.67931	down	--	Cellular Component: cytoplasm (GO:0005737);; Biological Process: mRNA modification (GO:0016556);;	--	Clustered mitochondria protein OS=Arabidopsis thaliana GN=FMT PE=2 SV=1	PREDICTED: clustered mitochondria protein homolog [Solanum lycopersicum]
c18231.graph_c1	1.79135	0.432459	0.00146491	-1.99795	down	Posttranslational modification, protein turnover, chaperones	Biological Process: proteolysis (GO:0006508);; Molecular Function: serine-type peptidase activity (GO:0008236);;	--	Subtilisin-like protease OS=Arabidopsis thaliana GN=ARA12 PE=1 SV=1	hypothetical protein PRUPE_ppa001938mg [Prunus persica]
c43508.graph_c0	2.98019	0.412492	1.18122e-06	-2.72404	down	--	Cellular Component: integral component of plasma membrane (GO:0005887);; Biological Process: carbohydrate transport (GO:0008643);; Molecular Function: sugar transmembrane transporter activity (GO:0051119);;	--	Bidirectional sugar transporter SWEET16 OS=Oryza sativa subsp. japonica GN=SWEET16 PE=2 SV=1	PREDICTED: bidirectional sugar transporter SWEET16-like [Solanum lycopersicum]
c33390.graph_c0	14.0046	5.70116	6.87896e-07	-1.35197	down	--	--	--	Polygalacturonase inhibitor OS=Vitis vinifera GN=pgip PE=1 SV=1	polygalacturonase inhibitor [Actinidia deliciosa]
c37676.graph_c1	4.48144	1.69809	6.97491e-05	-1.44161	down	--	Biological Process: metabolic process (GO:0008152);; Molecular Function: 1,2-alpha-L-fucosidase activity (GO:0047513);; Cellular Component: apoplast (GO:0048046);;	--	Alpha-L-fucosidase 2 OS=Arabidopsis thaliana GN=At4g34260 PE=2 SV=1	hypothetical protein PRUPE_ppa001398mg [Prunus persica]
c29727.graph_c0	7.19629	2.50531	0.000394791	-1.54849	down	--	Cellular Component: endoplasmic reticulum (GO:0005783);; Cellular Component: Golgi apparatus (GO:0005794);;	--	--	PREDICTED: kynurenine formamidase-like [Solanum lycopersicum]
c20049.graph_c0	30.2203	11.4668	4.8359e-11	-1.45881	down	--	Molecular Function: transcription cofactor activity (GO:0003712);; Molecular Function: histone acetyltransferase activity (GO:0004402);; Cellular Component: nucleus (GO:0005634);; Cellular Component: cytoplasm (GO:0005737);; Biological Process: regulation of transcription, DNA-templated (GO:0006355);; Biological Process: circadian rhythm (GO:0007623);; Molecular Function: zinc ion binding (GO:000…	--	BTB/POZ and TAZ domain-containing protein 1 OS=Arabidopsis thaliana GN=BT1 PE=1 SV=1	hypothetical protein PRUPE_ppa006416mg [Prunus persica]
c37299.graph_c0	4.98231	1.17917	1.66069e-08	-2.09304	down	--	Molecular Function: serine-type carboxypeptidase activity (GO:0004185);; Cellular Component: extracellular space (GO:0005615);; Biological Process: proteolysis (GO:0006508);; Biological Process: brassinosteroid mediated signaling pathway (GO:0009742);;	--	Serine carboxypeptidase 24 OS=Arabidopsis thaliana GN=SCPL24 PE=1 SV=1	Alpha/beta-Hydrolases superfamily protein [Theobroma cacao]
c41432.graph_c0	46.9052	21.3881	2.41584e-08	-1.19664	down	Inorganic ion transport and metabolism	Molecular Function: nucleotide binding (GO:0000166);; Cellular Component: plasma membrane (GO:0005886);; Cellular Component: chloroplast (GO:0009507);; Biological Process: regulation of proton transport (GO:0010155);; Molecular Function: potassium:hydrogen antiporter activity (GO:0015386);; Cellular Component: integral component of membrane (GO:0016021);; Biological Process: protein autophosphory…	--	K(+) efflux antiporter 3, chloroplastic OS=Arabidopsis thaliana GN=KEA3 PE=1 SV=2	Glutathione-regulated potassium-efflux system protein kefB, putative [Ricinus communis]
c36590.graph_c0	24.6135	6.84734	6.66134e-16	-1.90072	down	--	Cellular Component: plasma membrane (GO:0005886);; Cellular Component: chloroplast (GO:0009507);;	--	--	PREDICTED: uncharacterized protein LOC100255653 [Vitis vinifera]
c24602.graph_c0	5.80052	0.663942	0	-3.15874	down	--	--	--	Putative ribonuclease H protein At1g65750 OS=Arabidopsis thaliana GN=At1g65750 PE=3 SV=1	hypothetical protein PRUPE_ppa022115mg [Prunus persica]
c30854.graph_c0	14.5181	5.32646	1.21016e-07	-1.49804	down	--	Molecular Function: structural constituent of ribosome (GO:0003735);; Cellular Component: ribosome (GO:0005840);; Biological Process: translation (GO:0006412);;	--	--	PREDICTED: uncharacterized protein LOC101261044 isoform 2 [Solanum lycopersicum]
c35588.graph_c0	19.2695	9.47269	1.4868e-05	-1.08577	down	--	Molecular Function: protein kinase activity (GO:0004672);; Molecular Function: structural molecule activity (GO:0005198);; Molecular Function: ATP binding (GO:0005524);; Biological Process: protein phosphorylation (GO:0006468);; Cellular Component: chloroplast (GO:0009507);;	--	--	PREDICTED: uncharacterized protein LOC101254880 [Solanum lycopersicum]
c40610.graph_c0	183.475	62.6504	6.66134e-16	-1.61344	down	--	Biological Process: pentose-phosphate shunt (GO:0006098);; Cellular Component: chloroplast thylakoid membrane (GO:0009535);; Cellular Component: chloroplast stroma (GO:0009570);; Cellular Component: chloroplast envelope (GO:0009941);; Biological Process: isopentenyl diphosphate biosynthetic process, methylerythritol 4-phosphate pathway (GO:0019288);; Biological Process: protein targeting to chlor…	--	--	PREDICTED: uncharacterized protein LOC101245116 isoform 1 [Solanum lycopersicum]
c40899.graph_c0	88.1507	29.311	1.11022e-16	-1.65162	down	Coenzyme transport and metabolism	Molecular Function: uroporphyrinogen decarboxylase activity (GO:0004853);; Biological Process: tryptophan catabolic process (GO:0006569);; Biological Process: protoporphyrinogen IX biosynthetic process (GO:0006782);; Cellular Component: chloroplast stroma (GO:0009570);; Biological Process: indoleacetic acid biosynthetic process (GO:0009684);; Biological Process: response to cadmium ion (GO:004668…	K01599|0.0|vvi:100252130|hypothetical protein LOC100252130	Uroporphyrinogen decarboxylase 1, chloroplastic OS=Arabidopsis thaliana GN=HEME1 PE=2 SV=2	PREDICTED: uroporphyrinogen decarboxylase 1, chloroplastic-like [Vitis vinifera]
c32174.graph_c0	120.627	36.5379	0	-1.78633	down	Translation, ribosomal structure and biogenesis	Biological Process: transcription, DNA-templated (GO:0006351);; Cellular Component: chloroplast stroma (GO:0009570);; Biological Process: plastid organization (GO:0009657);; Biological Process: shoot system morphogenesis (GO:0010016);; Molecular Function: rRNA binding (GO:0019843);; Cellular Component: cytosolic ribosome (GO:0022626);; Biological Process: regulation of cellular metabolic process …	K02864|1e-95|vvi:100245108|hypothetical protein LOC100245108	50S ribosomal protein L10, chloroplastic OS=Nicotiana tabacum GN=RPL10 PE=2 SV=1	RecName: Full=50S ribosomal protein L10, chloroplastic; AltName: Full=CL10; Flags: Precursor
c35812.graph_c0	26.0786	10.2187	9.06429e-10	-1.41162	down	Translation, ribosomal structure and biogenesis	Molecular Function: RNA binding (GO:0003723);; Cellular Component: nucleus (GO:0005634);; Biological Process: pentose-phosphate shunt (GO:0006098);; Biological Process: rRNA processing (GO:0006364);; Biological Process: response to cold (GO:0009409);; Cellular Component: chloroplast stroma (GO:0009570);; Biological Process: photosynthetic electron transport in photosystem I (GO:0009773);; Biologi…	--	30S ribosomal protein S1, chloroplastic OS=Spinacia oleracea GN=RPS1 PE=1 SV=1	Nucleic acid-binding proteins superfamily isoform 1 [Theobroma cacao]
c41758.graph_c0	14.4227	6.88712	6.7238e-06	-1.12719	down	Amino acid transport and metabolism	Molecular Function: prephenate dehydratase activity (GO:0004664);; Biological Process: L-phenylalanine biosynthetic process (GO:0009094);; Cellular Component: chloroplast (GO:0009507);; Biological Process: vernalization response (GO:0010048);; Molecular Function: amino acid binding (GO:0016597);; Biological Process: anthocyanin accumulation in tissues in response to UV light (GO:0043481);; Biolog…	--	Arogenate dehydratase/prephenate dehydratase 1, chloroplastic OS=Arabidopsis thaliana GN=ADT1 PE=1 SV=1	PREDICTED: arogenate dehydratase/prephenate dehydratase 1, chloroplastic-like [Solanum lycopersicum]
c39584.graph_c2	403.634	146.402	3.33067e-14	-1.52773	down	--	Molecular Function: ATP binding (GO:0005524);; Cellular Component: chloroplast stroma (GO:0009570);; Cellular Component: chromoplast stroma (GO:0009575);; Molecular Function: nucleoside-triphosphatase activity (GO:0017111);;	--	Protein ycf2 OS=Nicotiana tomentosiformis GN=ycf2-A PE=3 SV=1	putative RF2 protein [Antirrhinum majus]
c19143.graph_c0	19.5854	9.22804	2.43561e-06	-1.1469	down	Posttranslational modification, protein turnover, chaperones	Biological Process: maltose metabolic process (GO:0000023);; Molecular Function: serine-type endopeptidase activity (GO:0004252);; Biological Process: proteolysis (GO:0006508);; Cellular Component: chloroplast thylakoid lumen (GO:0009543);; Biological Process: thylakoid membrane organization (GO:0010027);; Biological Process: photosystem II repair (GO:0010206);; Biological Process: starch biosynt…	--	Protease Do-like 8, chloroplastic OS=Arabidopsis thaliana GN=DEGP8 PE=1 SV=1	PREDICTED: protease Do-like 8, chloroplastic-like [Vitis vinifera]
c40304.graph_c1	6.31705	3.17616	4.09944e-05	-1.05322	down	Replication, recombination and repair	Molecular Function: nucleic acid binding (GO:0003676);; Biological Process: DNA metabolic process (GO:0006259);;	--	Retrovirus-related Pol polyprotein from transposon 297 OS=Drosophila melanogaster GN=pol PE=4 SV=1	F5M15.26 [Arabidopsis thaliana]
c34502.graph_c0	35.7932	15.7281	2.05538e-08	-1.24863	down	--	Cellular Component: chloroplast (GO:0009507);; Biological Process: plastid organization (GO:0009657);; Biological Process: ncRNA metabolic process (GO:0034660);;	--	Uncharacterized serine-rich protein C1E8.05 OS=Schizosaccharomyces pombe (strain 972 / ATCC 24843) GN=SPBC1E8.05 PE=2 SV=1	PREDICTED: uncharacterized protein LOC101263704 [Solanum lycopersicum]
c22899.graph_c0	5.81151	1.77892	0.000459146	-1.7147	down	Signal transduction mechanisms	Biological Process: phosphorelay signal transduction system (GO:0000160);; Cellular Component: nucleus (GO:0005634);; Cellular Component: cytoplasm (GO:0005737);; Molecular Function: histidine phosphotransfer kinase activity (GO:0009927);; Molecular Function: 2-alkenal reductase [NAD(P)] activity (GO:0032440);; Biological Process: oxidation-reduction process (GO:0055114);; Biological Process: reg…	K14490|6e-82|vvi:100246353|hypothetical protein LOC100246353	Histidine-containing phosphotransfer protein 4 OS=Arabidopsis thaliana GN=AHP4 PE=1 SV=2	histidine phosphotransfer protein [Populus x canadensis]
c23313.graph_c0	104.163	33.5434	2.10942e-15	-1.69521	down	--	Biological Process: response to osmotic stress (GO:0006970);; Biological Process: response to cold (GO:0009409);; Biological Process: response to water deprivation (GO:0009414);; Biological Process: embryo development ending in seed dormancy (GO:0009793);;	--	11 kDa late embryogenesis abundant protein OS=Helianthus annuus PE=2 SV=1	group I late embryogenesis abundant protein [Brassica napus]
c24615.graph_c0	70.7173	29.8864	2.50443e-09	-1.30486	down	--	Biological Process: phosphatidylinositol biosynthetic process (GO:0006661);; Cellular Component: chloroplast thylakoid membrane (GO:0009535);; Biological Process: leaf morphogenesis (GO:0009965);; Cellular Component: integral component of membrane (GO:0016021);; Biological Process: cell differentiation (GO:0030154);; Biological Process: positive regulation of transcription, DNA-templated (GO:0045…	--	Protein FAM210B OS=Homo sapiens GN=FAM210B PE=1 SV=2	PREDICTED: protein FAM210B-like [Solanum lycopersicum]
c26188.graph_c0	14.5663	7.00048	0.000315169	-1.11338	down	Replication, recombination and repair	Molecular Function: catalytic activity (GO:0003824);; Molecular Function: binding (GO:0005488);; Biological Process: cellular process (GO:0009987);; Biological Process: macromolecule metabolic process (GO:0043170);; Biological Process: primary metabolic process (GO:0044238);;	--	Transposon Ty3-I Gag-Pol polyprotein OS=Saccharomyces cerevisiae (strain ATCC 204508 / S288c) GN=TY3B-I PE=3 SV=2	PREDICTED: uncharacterized protein LOC100782971 [Glycine max]
c33793.graph_c0	5.45887	1.32815	1.23492e-07	-2.04999	down	--	Biological Process: leaf morphogenesis (GO:0009965);; Biological Process: cell differentiation (GO:0030154);; Biological Process: positive regulation of transcription, DNA-templated (GO:0045893);;	--	--	hypothetical protein M569_03900, partial [Genlisea aurea]
c35272.graph_c0	9.39372	3.81905	4.91818e-07	-1.35422	down	--	Cellular Component: mitochondrion (GO:0005739);; Cellular Component: peroxisome (GO:0005777);; Molecular Function: o-succinylbenzoate-CoA ligase activity (GO:0008756);; Cellular Component: chloroplast (GO:0009507);; Molecular Function: AMP binding (GO:0016208);; Biological Process: phylloquinone biosynthetic process (GO:0042372);;	--	2-succinylbenzoate--CoA ligase, chloroplastic/peroxisomal OS=Arabidopsis thaliana GN=AAE14 PE=1 SV=1	PREDICTED: 2-succinylbenzoate--CoA ligase, chloroplastic/peroxisomal-like [Solanum lycopersicum]
c14490.graph_c0	48.3487	18.0512	2.55995e-12	-1.48337	down	--	Cellular Component: integral component of membrane (GO:0016021);; Biological Process: transmembrane transport (GO:0055085);;	--	UDP-galactose/UDP-glucose transporter 4 OS=Arabidopsis thaliana GN=UTR4 PE=2 SV=1	PREDICTED: UDP-galactose/UDP-glucose transporter 4-like [Fragaria vesca subsp. vesca]
c18803.graph_c0	61.8491	11.9115	0	-2.43239	down	Energy production and conversion	Biological Process: pentose-phosphate shunt (GO:0006098);; Molecular Function: electron carrier activity (GO:0009055);; Cellular Component: chloroplast thylakoid membrane (GO:0009535);; Biological Process: photosynthetic electron transport in photosystem I (GO:0009773);; Cellular Component: NAD(P)H dehydrogenase complex (plastoquinone) (GO:0010598);; Biological Process: starch biosynthetic proces…	--	--	NDH-dependent cyclic electron flow 1 isoform 1 [Theobroma cacao]
c32165.graph_c0	3.44929	0.639405	0.000173106	-2.33197	down	Energy production and conversion	Molecular Function: oxidoreductase activity, acting on CH-OH group of donors (GO:0016614);;	--	Tetrahydrocannabinolic acid synthase OS=Cannabis sativa PE=1 SV=1	PREDICTED: cannabidiolic acid synthase-like [Solanum lycopersicum]
c42046.graph_c0	10.8201	4.64845	2.28993e-06	-1.27576	down	General function prediction only	Cellular Component: integral component of membrane (GO:0016021);;	--	--	PREDICTED: uncharacterized protein LOC101249675 [Solanum lycopersicum]
c29872.graph_c0	39.8817	13.0748	6.66134e-16	-1.67072	down	Cell wall/membrane/envelope biogenesis	Molecular Function: metalloendopeptidase activity (GO:0004222);; Biological Process: proteolysis (GO:0006508);; Biological Process: phosphatidylglycerol biosynthetic process (GO:0006655);; Cellular Component: chloroplast thylakoid membrane (GO:0009535);; Biological Process: embryo development ending in seed dormancy (GO:0009793);; Biological Process: thylakoid membrane organization (GO:0010027);;…	--	--	PREDICTED: uncharacterized protein LOC100267324 [Vitis vinifera]
c36609.graph_c0	7.80378	3.62056	0.000441293	-1.16141	down	--	--	--	Probable inactive protein kinase DDB_G0270444 OS=Dictyostelium discoideum GN=DDB_G0270444 PE=1 SV=1	hypothetical protein MTR_027s0011 [Medicago truncatula]
c33735.graph_c0	15.1349	6.58679	2.02133e-06	-1.25793	down	Nucleotide transport and metabolism	Molecular Function: orotate phosphoribosyltransferase activity (GO:0004588);; Molecular Function: orotidine-5'-phosphate decarboxylase activity (GO:0004590);; Cellular Component: cytosol (GO:0005829);; Biological Process: 'de novo' pyrimidine nucleobase biosynthetic process (GO:0006207);; Biological Process: cellular response to phosphate starvation (GO:0016036);; Biological Process: 'de novo' UM…	K13421|1e-75|pop:POPTR_647290|hypothetical protein	Uridine 5&apos;-monophosphate synthase (Fragment) OS=Nicotiana tabacum GN=PYR5-6 PE=2 SV=1	hypothetical protein M569_10995, partial [Genlisea aurea]
c40342.graph_c0	600.739	282.178	8.94958e-08	-1.15452	down	--	Cellular Component: chloroplast (GO:0009507);; Cellular Component: photosystem I reaction center (GO:0009538);; Biological Process: photosynthesis (GO:0015979);;	K02693|5e-57|rcu:RCOM_1723530|photosystem I reaction center subunit IV A, chloroplast precursor	Photosystem I reaction center subunit IV A, chloroplastic OS=Nicotiana sylvestris GN=PSAEA PE=1 SV=1	hypothetical protein M569_02531 [Genlisea aurea]
c41289.graph_c0	60.8312	25.6248	2.18014e-09	-1.30952	down	Carbohydrate transport and metabolism	Biological Process: carbohydrate metabolic process (GO:0005975);; Cellular Component: plastid (GO:0009536);; Molecular Function: hydrolase activity (GO:0016787);; Biological Process: response to stimulus (GO:0050896);;	K01057|3e-99|pop:POPTR_772510|hypothetical protein	Probable 6-phosphogluconolactonase 4, chloroplastic OS=Oryza sativa subsp. japonica GN=Os09g0529100 PE=1 SV=2	PREDICTED: probable 6-phosphogluconolactonase 4, chloroplastic-like [Solanum lycopersicum]
c27648.graph_c0	44.9977	21.2301	2.17313e-07	-1.14708	down	Translation, ribosomal structure and biogenesis	Molecular Function: ATP binding (GO:0005524);; Cellular Component: mitochondrion (GO:0005739);; Biological Process: glutamyl-tRNA aminoacylation (GO:0006424);; Cellular Component: chloroplast stroma (GO:0009570);; Biological Process: mRNA modification (GO:0016556);; Molecular Function: transferase activity (GO:0016740);; Cellular Component: glutamyl-tRNA(Gln) amidotransferase complex (GO:0030956)…	K02434|0.0|vvi:100242665|hypothetical protein LOC100242665	Glutamyl-tRNA(Gln) amidotransferase subunit B, chloroplastic/mitochondrial OS=Ricinus communis GN=GATB PE=3 SV=1	PREDICTED: glutamyl-tRNA(Gln) amidotransferase subunit B, chloroplastic/mitochondrial-like [Solanum lycopersicum]
c25039.graph_c0	48.0293	22.494	4.51619e-07	-1.15681	down	--	Cellular Component: chloroplast (GO:0009507);; Biological Process: photosystem II assembly (GO:0010207);;	--	--	PREDICTED: uncharacterized protein LOC101249169 [Solanum lycopersicum]
c35420.graph_c0	5.5977	2.01147	1.16897e-05	-1.51789	down	--	Biological Process: transition metal ion transport (GO:0000041);; Molecular Function: aspartic-type endopeptidase activity (GO:0004190);; Cellular Component: extracellular region (GO:0005576);; Biological Process: proteolysis (GO:0006508);; Biological Process: vegetative to reproductive phase transition of meristem (GO:0010228);; Biological Process: glucuronoxylan metabolic process (GO:0010413);;…	--	Aspartic proteinase nepenthesin-1 OS=Nepenthes gracilis GN=nep1 PE=1 SV=1	predicted protein [Populus trichocarpa]
c31834.graph_c0	318.793	160.431	3.52081e-06	-1.05512	down	--	Biological Process: maltose metabolic process (GO:0000023);; Molecular Function: nucleotide binding (GO:0000166);; Biological Process: polysaccharide catabolic process (GO:0000272);; Molecular Function: NADPH dehydrogenase activity (GO:0003959);; Biological Process: pentose-phosphate shunt (GO:0006098);; Biological Process: rRNA processing (GO:0006364);; Biological Process: unsaturated fatty acid…	K00218|0.0|vvi:100255647|hypothetical protein LOC100255647	Protochlorophyllide reductase, chloroplastic OS=Daucus carota GN=POR1 PE=2 SV=1	NADPH:protochlorophyllide oxidoreductase [Nicotiana tabacum]
c30503.graph_c0	4.74396	1.8289	0.000852337	-1.41036	down	Signal transduction mechanisms	Molecular Function: phosphoprotein phosphatase activity (GO:0004721);; Cellular Component: nucleus (GO:0005634);; Cellular Component: cytoplasm (GO:0005737);; Biological Process: metabolic process (GO:0008152);; Biological Process: response to water deprivation (GO:0009414);;	--	Probable protein phosphatase 2C 34 OS=Arabidopsis thaliana GN=At3g05640 PE=2 SV=1	Phosphatase 2C family protein isoform 1 [Theobroma cacao]
c37773.graph_c7	42.3306	16.825	5.1721e-09	-1.3903	down	--	Biological Process: very long-chain fatty acid metabolic process (GO:0000038);; Biological Process: sulfur amino acid metabolic process (GO:0000096);; Molecular Function: 3-oxoacyl-[acyl-carrier-protein] synthase activity (GO:0004315);; Biological Process: glycine catabolic process (GO:0006546);; Biological Process: unsaturated fatty acid biosynthetic process (GO:0006636);; Biological Process: ox…	K09458|1e-137|pop:POPTR_910700|3-oxoacyl-[acyl-carrier-protein] synthase II (EC:2.3.1.41)	3-oxoacyl-[acyl-carrier-protein] synthase II, chloroplastic OS=Arabidopsis thaliana GN=KAS2 PE=1 SV=1	Fatty acid biosynthesis 1 isoform 5 [Theobroma cacao]
c14449.graph_c0	28.9914	12.4787	3.4024e-07	-1.27521	down	--	Biological Process: maltose metabolic process (GO:0000023);; Molecular Function: calcium ion binding (GO:0005509);; Biological Process: pentose-phosphate shunt (GO:0006098);; Cellular Component: nitrite reductase complex [NAD(P)H] (GO:0009344);; Cellular Component: chloroplast thylakoid lumen (GO:0009543);; Cellular Component: photosystem II oxygen evolving complex (GO:0009654);; Biological Proce…	K08901|2e-52|vvi:100243071|hypothetical protein LOC100243071	PsbQ-like protein 1, chloroplastic OS=Arabidopsis thaliana GN=PQL1 PE=1 SV=1	Putative oxygen evolving enhancer protein 3, identical [Solanum demissum]
c31196.graph_c0	15.7573	1.95325	0	-3.04068	down	--	Molecular Function: transferase activity, transferring acyl groups (GO:0016746);;	--	Omega-hydroxypalmitate O-feruloyl transferase OS=Arabidopsis thaliana GN=HHT1 PE=1 SV=1	HXXXD-type acyl-transferase family protein, putative [Theobroma cacao]
c27410.graph_c0	218.317	111.485	5.81446e-06	-1.03389	down	--	Biological Process: lipid metabolic process (GO:0006629);; Molecular Function: hydrolase activity, acting on ester bonds (GO:0016788);; Cellular Component: apoplast (GO:0048046);;	--	GDSL esterase/lipase APG OS=Arabidopsis thaliana GN=APG PE=1 SV=1	zinc finger protein, putative [Ricinus communis]
c28359.graph_c2	39.8644	20.1828	8.78579e-06	-1.04504	down	General function prediction only	Cellular Component: endoplasmic reticulum (GO:0005783);; Cellular Component: plasma membrane (GO:0005886);; Biological Process: metabolic process (GO:0008152);; Biological Process: response to wounding (GO:0009611);; Biological Process: regulation of systemic acquired resistance (GO:0010112);; Molecular Function: IAA-Ala conjugate hydrolase activity (GO:0010179);; Molecular Function: hippurate hy…	K14664|0.0|vvi:100251400|hypothetical protein LOC100251400	IAA-amino acid hydrolase ILR1-like 4 OS=Arabidopsis thaliana GN=ILL4 PE=1 SV=2	jasmonoyl-L-isoleucine hydrolase 1 [Nicotiana attenuata]
c39486.graph_c0	5.62602	2.6459	9.62069e-05	-1.14522	down	Replication, recombination and repair	Biological Process: DNA metabolic process (GO:0006259);;	--	Uncharacterized protein 030L OS=Invertebrate iridescent virus 6 GN=IIV6-030L PE=3 SV=1	hypothetical protein SORBIDRAFT_09g008040 [Sorghum bicolor]
c29728.graph_c0	18.8702	5.03104	0	-1.96413	down	Lipid transport and metabolism	Molecular Function: acetyl-CoA carboxylase activity (GO:0003989);; Biological Process: fatty acid biosynthetic process (GO:0006633);; Cellular Component: acetyl-CoA carboxylase complex (GO:0009317);; Cellular Component: chloroplast (GO:0009507);; Molecular Function: transferase activity (GO:0016740);;	K01962|0.0|vvi:100256854|hypothetical protein LOC100256854	Acetyl-coenzyme A carboxylase carboxyl transferase subunit alpha, chloroplastic OS=Arabidopsis thaliana GN=CAC3 PE=1 SV=1	PREDICTED: acetyl-coenzyme A carboxylase carboxyl transferase subunit alpha, chloroplastic-like [Solanum lycopersicum]
c31580.graph_c4	27.5626	13.5246	4.71308e-06	-1.08944	down	--	Cellular Component: chloroplast thylakoid membrane (GO:0009535);; Cellular Component: chloroplast envelope (GO:0009941);; Molecular Function: oxidoreductase activity, acting on NAD(P)H, quinone or similar compound as acceptor (GO:0016655);; Biological Process: oxidation-reduction process (GO:0055114);;	--	Uncharacterized protein At4g37920, chloroplastic OS=Arabidopsis thaliana GN=At4g37920 PE=1 SV=2	PREDICTED: uncharacterized protein At4g37920, chloroplastic-like [Vitis vinifera]
c32019.graph_c0	5.71684	1.6699	1.08578e-08	-1.81348	down	General function prediction only	Molecular Function: acid phosphatase activity (GO:0003993);; Molecular Function: metal ion binding (GO:0046872);;	--	Probable inactive purple acid phosphatase 27 OS=Arabidopsis thaliana GN=PAP27 PE=2 SV=1	hypothetical protein PRUPE_ppa002700mg [Prunus persica]
c15186.graph_c0	2.04236	0.39262	0.000108239	-2.29599	down	Inorganic ion transport and metabolism	Cellular Component: plasma membrane (GO:0005886);; Cellular Component: plant-type vacuole membrane (GO:0009705);; Molecular Function: nitrate transmembrane transporter activity (GO:0015112);; Biological Process: nitrate transport (GO:0015706);; Cellular Component: integral component of membrane (GO:0016021);; Biological Process: transmembrane transport (GO:0055085);;	--	High affinity nitrate transporter 2.7 OS=Arabidopsis thaliana GN=NRT2.7 PE=2 SV=1	PREDICTED: high affinity nitrate transporter 2.7-like isoform 1 [Solanum lycopersicum]
c39727.graph_c0	16.2529	3.12442	0	-2.43524	down	--	--	--	Putative E3 ubiquitin-protein ligase LIN OS=Medicago truncatula GN=LIN PE=2 SV=1	hypothetical protein VITISV_004500 [Vitis vinifera]
c33665.graph_c0	2.33492	0.201987	1.18596e-06	-3.215	down	General function prediction only	Cellular Component: cytoplasm (GO:0005737);; Molecular Function: oxidoreductase activity, acting on paired donors, with incorporation or reduction of molecular oxygen, 2-oxoglutarate as one donor, and incorporation of one atom each of oxygen into both donors (GO:0016706);; Biological Process: single-organism metabolic process (GO:0044710);;	--	Gibberellin 20 oxidase 1 OS=Arabidopsis thaliana GN=GA20OX1 PE=2 SV=2	PREDICTED: gibberellin 2-beta-dioxygenase 7-like [Solanum lycopersicum]
c27358.graph_c1	4.64373	1.68622	0.000853158	-1.48963	down	Posttranslational modification, protein turnover, chaperones	Biological Process: metabolic process (GO:0008152);; Molecular Function: amino acid binding (GO:0016597);;	--	[Protein-PII] uridylyltransferase OS=Bradyrhizobium japonicum (strain USDA 110) GN=glnD PE=3 SV=2	predicted protein [Populus trichocarpa]
c38975.graph_c1	5.79477	1.96584	5.84463e-07	-1.60259	down	--	--	--	--	hypothetical protein M569_11401 [Genlisea aurea]
c33293.graph_c0	21.7033	10.7906	3.5164e-05	-1.06905	down	Lipid transport and metabolism	Biological Process: sulfur amino acid metabolic process (GO:0000096);; Biological Process: glycine catabolic process (GO:0006546);; Biological Process: unsaturated fatty acid biosynthetic process (GO:0006636);; Biological Process: oxidoreduction coenzyme metabolic process (GO:0006733);; Biological Process: vitamin metabolic process (GO:0006766);; Biological Process: cellular amino acid biosynthet…	K00991|1e-112|vvi:100247263|hypothetical protein LOC100247263	2-C-methyl-D-erythritol 4-phosphate cytidylyltransferase, chloroplastic OS=Arabidopsis thaliana GN=ISPD PE=1 SV=1	plastid 2-C-methyl-D-erythritol 4-phosphate cytidylyltransferase [Picrorhiza kurrooa]
c38258.graph_c0	5.72749	2.96035	0.00888678	-1.0065	down	Secondary metabolites biosynthesis, transport and catabolism	Molecular Function: monooxygenase activity (GO:0004497);; Molecular Function: binding (GO:0005488);; Molecular Function: oxidoreductase activity, acting on paired donors, with incorporation or reduction of molecular oxygen (GO:0016705);;	--	Cytochrome P450 71A1 OS=Persea americana GN=CYP71A1 PE=1 SV=2	PREDICTED: cytochrome P450 83B1 [Vitis vinifera]
c30198.graph_c0	75.1952	28.7633	2.41729e-12	-1.44934	down	--	Cellular Component: chloroplast (GO:0009507);; Biological Process: thylakoid membrane organization (GO:0010027);; Biological Process: isopentenyl diphosphate biosynthetic process, methylerythritol 4-phosphate pathway (GO:0019288);;	--	--	PREDICTED: uncharacterized protein LOC101254084 [Solanum lycopersicum]
c22775.graph_c0	10.712	1.93055	2.65527e-05	-2.38691	down	--	Molecular Function: diacylglycerol kinase activity (GO:0004143);; Cellular Component: nucleus (GO:0005634);; Cellular Component: plasma membrane (GO:0005886);; Biological Process: protein kinase C-activating G-protein coupled receptor signaling pathway (GO:0007205);; Biological Process: metabolic process (GO:0008152);; Biological Process: pollen tube growth (GO:0009860);; Biological Process: nega…	K00901|5e-50|pop:POPTR_819393|hypothetical protein	Diacylglycerol kinase 4 OS=Arabidopsis thaliana GN=DGK4 PE=2 SV=1	hypothetical protein M569_08172, partial [Genlisea aurea]
c13550.graph_c0	4.37451	1.62563	1.13555e-05	-1.47244	down	--	Molecular Function: peptidase activity (GO:0008233);; Biological Process: macromolecule metabolic process (GO:0043170);; Biological Process: primary metabolic process (GO:0044238);;	--	Aspartic proteinase nepenthesin-1 OS=Nepenthes gracilis GN=nep1 PE=1 SV=1	PREDICTED: aspartic proteinase nepenthesin-2-like isoform 1 [Solanum lycopersicum]
c15586.graph_c0	2.24018	0.210643	1.88504e-07	-3.16443	down	--	Molecular Function: protein dimerization activity (GO:0046983);;	--	Transcription factor bHLH25 OS=Arabidopsis thaliana GN=BHLH25 PE=2 SV=2	hypothetical protein PRUPE_ppa007561mg [Prunus persica]
c37710.graph_c0	11.6264	5.85777	0.000145416	-1.04888	down	--	Molecular Function: ATP-dependent peptidase activity (GO:0004176);; Cellular Component: nucleus (GO:0005634);; Cellular Component: chloroplast (GO:0009507);;	--	--	PREDICTED: uncharacterized protein LOC101246986 [Solanum lycopersicum]
c18509.graph_c0	45.2373	19.2225	1.47779e-08	-1.29592	down	Energy production and conversion	Molecular Function: metal ion binding (GO:0046872);;	--	Rubredoxin-1 OS=Desulfovibrio desulfuricans (strain ATCC 27774 / DSM 6949) GN=rd1 PE=1 SV=1	Rubredoxin-like superfamily protein [Theobroma cacao]
c37292.graph_c0	9.38329	3.64761	1.3492e-05	-1.41074	down	Posttranslational modification, protein turnover, chaperones	Cellular Component: plastid (GO:0009536);; Molecular Function: isomerase activity (GO:0016853);; Biological Process: peptidyl-proline modification (GO:0018208);;	--	Peptidyl-prolyl cis-trans isomerase FKBP17-1, chloroplastic OS=Arabidopsis thaliana GN=FKBP17-1 PE=2 SV=1	PREDICTED: peptidyl-prolyl cis-trans isomerase FKBP17-1, chloroplastic-like [Solanum lycopersicum]
c33555.graph_c0	4.79187	1.59064	0.000118015	-1.6163	down	--	--	--	--	hypothetical protein M569_11401 [Genlisea aurea]
c42359.graph_c0	7.18742	2.75688	7.74739e-07	-1.43406	down	--	Biological Process: regulation of transcription, DNA-templated (GO:0006355);;	--	Scarecrow-like protein 32 OS=Arabidopsis thaliana GN=SCL32 PE=2 SV=1	hypothetical protein VITISV_023403 [Vitis vinifera]
c18043.graph_c0	4.70982	0	0	-8.25527	down	--	--	--	Putative ribonuclease H protein At1g65750 OS=Arabidopsis thaliana GN=At1g65750 PE=3 SV=1	hypothetical protein [Beta vulgaris subsp. vulgaris]
c40395.graph_c0	287.326	124.414	9.59193e-10	-1.27158	down	Translation, ribosomal structure and biogenesis	Molecular Function: RNA binding (GO:0003723);; Molecular Function: structural constituent of ribosome (GO:0003735);; Cellular Component: mitochondrial small ribosomal subunit (GO:0005763);; Biological Process: DNA-templated transcription, elongation (GO:0006354);; Biological Process: translation (GO:0006412);; Cellular Component: chloroplast stroma (GO:0009570);; Biological Process: photosyntheti…	--	30S ribosomal protein S13, chloroplastic OS=Arabidopsis thaliana GN=RPS13 PE=2 SV=1	PREDICTED: 30S ribosomal protein S13, chloroplastic-like [Solanum lycopersicum]
c25817.graph_c0	30.574	12.0121	2.81862e-10	-1.40875	down	--	Molecular Function: DNA binding (GO:0003677);; Molecular Function: sequence-specific DNA binding transcription factor activity (GO:0003700);; Cellular Component: nucleus (GO:0005634);; Biological Process: response to water deprivation (GO:0009414);; Biological Process: response to virus (GO:0009615);; Biological Process: response to salt stress (GO:0009651);; Biological Process: response to absci…	--	Homeobox-leucine zipper protein ATHB-12 OS=Arabidopsis thaliana GN=ATHB-12 PE=2 SV=1	predicted protein [Populus trichocarpa]
c32528.graph_c1	2.78774	0.383663	7.5765e-06	-2.70704	down	--	Cellular Component: endoplasmic reticulum (GO:0005783);; Cellular Component: plasma membrane (GO:0005886);; Biological Process: pollen sperm cell differentiation (GO:0048235);;	--	Protein HAPLESS 2 OS=Arabidopsis thaliana GN=HAP2 PE=2 SV=1	PREDICTED: uncharacterized protein LOC100266763 [Vitis vinifera]
c40991.graph_c0	79.6131	29.101	1.28342e-13	-1.51485	down	General function prediction only	Molecular Function: acid phosphatase activity (GO:0003993);; Biological Process: rRNA processing (GO:0006364);; Biological Process: unsaturated fatty acid biosynthetic process (GO:0006636);; Cellular Component: chloroplast thylakoid membrane (GO:0009535);; Cellular Component: chloroplast thylakoid lumen (GO:0009543);; Biological Process: response to blue light (GO:0009637);; Biological Process: p…	--	UPF0603 protein At1g54780, chloroplastic OS=Arabidopsis thaliana GN=At1g54780 PE=1 SV=1	PREDICTED: UPF0603 protein At1g54780, chloroplastic-like [Solanum lycopersicum]
c41074.graph_c0	61.2704	31.3966	9.40174e-06	-1.02814	down	--	Cellular Component: plastid chromosome (GO:0009508);; Cellular Component: chloroplast thylakoid membrane (GO:0009535);; Cellular Component: chloroplast stroma (GO:0009570);; Cellular Component: chloroplast inner membrane (GO:0009706);; Biological Process: thylakoid membrane organization (GO:0010027);; Biological Process: vesicle organization (GO:0016050);;	K03969|1e-169|vvi:100249595|hypothetical protein LOC100249595	Membrane-associated protein VIPP1, chloroplastic OS=Arabidopsis thaliana GN=VIPP1 PE=1 SV=1	PREDICTED: membrane-associated protein VIPP1, chloroplastic-like [Solanum lycopersicum]
c36319.graph_c0	165.672	51.6735	0	-1.74459	down	--	Biological Process: MAPK cascade (GO:0000165);; Molecular Function: RNA binding (GO:0003723);; Molecular Function: protein binding (GO:0005515);; Cellular Component: vacuole (GO:0005773);; Cellular Component: peroxisome (GO:0005777);; Cellular Component: Golgi apparatus (GO:0005794);; Cellular Component: ribosome (GO:0005840);; Biological Process: pentose-phosphate shunt (GO:0006098);; Biological…	--	Chloroplast stem-loop binding protein of 41 kDa b, chloroplastic OS=Arabidopsis thaliana GN=CSP41B PE=1 SV=1	unnamed protein product [Thellungiella halophila]
c40545.graph_c0	118.685	56.422	1.75623e-07	-1.13675	down	--	Biological Process: rRNA processing (GO:0006364);; Biological Process: regulation of translation (GO:0006417);; Cellular Component: chloroplast (GO:0009507);; Cellular Component: plastid chromosome (GO:0009508);; Biological Process: chloroplast relocation (GO:0009902);; Biological Process: leaf morphogenesis (GO:0009965);; Biological Process: thylakoid membrane organization (GO:0010027);; Biologi…	--	Uncharacterized histidine-rich protein DDB_G0274557 OS=Dictyostelium discoideum GN=DDB_G0274557 PE=4 SV=1	PREDICTED: uncharacterized protein LOC101249346 [Solanum lycopersicum]
c30793.graph_c0	50.9734	23.2678	2.58343e-07	-1.19326	down	--	Biological Process: maltose metabolic process (GO:0000023);; Biological Process: glycerol ether metabolic process (GO:0006662);; Molecular Function: enzyme activator activity (GO:0008047);; Molecular Function: electron carrier activity (GO:0009055);; Biological Process: response to light stimulus (GO:0009416);; Cellular Component: chloroplast thylakoid (GO:0009534);; Cellular Component: chloropla…	--	Thioredoxin Y2, chloroplastic OS=Arabidopsis thaliana GN=At1g43560 PE=2 SV=1	PREDICTED: thioredoxin Y1, chloroplastic-like [Cicer arietinum]
c40649.graph_c0	151.093	68.7792	2.44915e-08	-1.199	down	Posttranslational modification, protein turnover, chaperones	Molecular Function: ATP binding (GO:0005524);; Cellular Component: nucleus (GO:0005634);; Cellular Component: mitochondrion (GO:0005739);; Biological Process: protein folding (GO:0006457);; Biological Process: response to heat (GO:0009408);; Biological Process: response to cold (GO:0009409);; Cellular Component: chloroplast stroma (GO:0009570);; Cellular Component: thylakoid (GO:0009579);; Cellul…	--	Stromal 70 kDa heat shock-related protein, chloroplastic OS=Pisum sativum GN=HSP70 PE=1 SV=1	chloroplast heat shock protein 70-2, partial [Genlisea aurea]
c36438.graph_c0	15.6684	3.07287	0	-2.39335	down	Lipid transport and metabolism	Biological Process: transition metal ion transport (GO:0000041);; Cellular Component: nucleus (GO:0005634);; Cellular Component: cytoplasm (GO:0005737);; Molecular Function: hydrolase activity (GO:0016787);;	--	Monoglyceride lipase OS=Mus musculus GN=Mgll PE=1 SV=1	PREDICTED: monoglyceride lipase-like [Solanum lycopersicum]
c30945.graph_c0	9.6069	3.69805	9.72862e-07	-1.42882	down	--	Molecular Function: S-adenosylmethionine-dependent methyltransferase activity (GO:0008757);; Biological Process: lignin biosynthetic process (GO:0009809);; Biological Process: methylation (GO:0032259);; Cellular Component: intracellular part (GO:0044424);; Molecular Function: protein dimerization activity (GO:0046983);; Molecular Function: caffeate O-methyltransferase activity (GO:0047763);;	K05279|1e-105|pop:POPTR_834247|COMT2	Caffeic acid 3-O-methyltransferase OS=Catharanthus roseus GN=COMT1 PE=2 SV=1	RecName: Full=Caffeic acid 3-O-methyltransferase; Short=CAOMT; Short=COMT; AltName: Full=S-adenosysl-L-methionine:caffeic acid 3-O-methyltransferase
c17793.graph_c1	13.3599	5.12754	2.42116e-05	-1.42689	down	--	Biological Process: regulation of transcription, DNA-templated (GO:0006355);; Biological Process: chloroplast organization (GO:0009658);; Cellular Component: chloroplast nucleoid (GO:0042644);;	--	--	PREDICTED: uncharacterized protein LOC101244147 [Solanum lycopersicum]
c13954.graph_c0	27.5803	12.6641	9.37384e-06	-1.18152	down	--	Molecular Function: GTPase activity (GO:0003924);; Molecular Function: protein binding (GO:0005515);; Molecular Function: GTP binding (GO:0005525);; Biological Process: GTP catabolic process (GO:0006184);; Biological Process: protein import into nucleus (GO:0006606);; Biological Process: protein targeting to mitochondrion (GO:0006626);; Cellular Component: chloroplast outer membrane (GO:0009707);…	--	Translocase of chloroplast 34 OS=Pisum sativum GN=TOC34 PE=1 SV=1	hypothetical protein M569_04753, partial [Genlisea aurea]
c21648.graph_c0	1.83492	0	1.2398e-08	-4.97112	down	--	Molecular Function: 1-deoxy-D-xylulose-5-phosphate synthase activity (GO:0008661);; Biological Process: terpenoid biosynthetic process (GO:0016114);;	K01662|0.0|rcu:RCOM_0025610|1-deoxyxylulose-5-phosphate synthase, putative (EC:2.2.1.7)	Probable 1-deoxy-D-xylulose-5-phosphate synthase 2, chloroplastic OS=Oryza sativa subsp. japonica GN=Os07g0190000 PE=2 SV=1	1-deoxy-D-xylulose-5-phosphate synthase [Antirrhinum majus]
c21955.graph_c3	3.33286	0.720791	0.0083061	-2.09785	down	Energy production and conversion	Molecular Function: oxidoreductase activity, acting on CH-OH group of donors (GO:0016614);;	--	Cannabidiolic acid synthase-like 2 OS=Cannabis sativa GN=CBDAS3 PE=2 SV=1	FAD-binding Berberine family protein [Theobroma cacao]
c40049.graph_c1	8.61128	3.88104	2.02139e-06	-1.2092	down	--	Molecular Function: transferase activity, transferring phosphorus-containing groups (GO:0016772);; Molecular Function: organic cyclic compound binding (GO:0097159);; Molecular Function: heterocyclic compound binding (GO:1901363);;	--	LINE-1 reverse transcriptase homolog OS=Nycticebus coucang PE=1 SV=1	PREDICTED: uncharacterized protein LOC100799415 [Glycine max]
c34323.graph_c2	56.7584	19.3575	5.77316e-15	-1.614	down	General function prediction only	Biological Process: mRNA splicing, via spliceosome (GO:0000398);; Molecular Function: RNA binding (GO:0003723);; Cellular Component: nucleus (GO:0005634);; Cellular Component: chloroplast stroma (GO:0009570);;	--	28 kDa ribonucleoprotein, chloroplastic OS=Nicotiana sylvestris PE=1 SV=1	RNA-binding family protein, putative [Theobroma cacao]
c34879.graph_c0	39.2209	15.8614	1.34752e-10	-1.36865	down	Carbohydrate transport and metabolism	Molecular Function: adenosine kinase activity (GO:0004001);; Molecular Function: ribokinase activity (GO:0004747);; Cellular Component: mitochondrion (GO:0005739);; Biological Process: D-ribose metabolic process (GO:0006014);; Biological Process: AMP biosynthetic process (GO:0006167);; Cellular Component: chloroplast (GO:0009507);; Biological Process: chloroplast relocation (GO:0009902);; Biologi…	--	Uncharacterized sugar kinase slr0537 OS=Synechocystis sp. (strain PCC 6803 / Kazusa) GN=slr0537 PE=3 SV=1	PREDICTED: uncharacterized sugar kinase slr0537-like [Fragaria vesca subsp. vesca]
c34141.graph_c0	10.9156	4.1869	7.74739e-07	-1.43406	down	General function prediction only	Biological Process: metabolic process (GO:0008152);; Molecular Function: oxidoreductase activity (GO:0016491);;	--	Gibberellin 2-beta-dioxygenase 8 OS=Arabidopsis thaliana GN=GA2OX8 PE=1 SV=2	20G-Fe(II) oxidoreductase [Populus trichocarpa]
c36162.graph_c0	94.7658	25.7749	0	-1.94059	down	Translation, ribosomal structure and biogenesis	Molecular Function: copper ion binding (GO:0005507);; Biological Process: pentose-phosphate shunt (GO:0006098);; Biological Process: aromatic amino acid family biosynthetic process (GO:0009073);; Cellular Component: chloroplast stroma (GO:0009570);; Cellular Component: thylakoid (GO:0009579);; Biological Process: chloroplast organization (GO:0009658);; Biological Process: embryo development (GO:0…	K02838|1e-118|vvi:100263214|hypothetical protein LOC100263214	Ribosome-recycling factor, chloroplastic (Fragment) OS=Daucus carota GN=RRF PE=2 SV=2	Ribosome recycling factor isoform 1 [Theobroma cacao]
c39542.graph_c0	207.218	77.3153	7.17204e-14	-1.48675	down	Translation, ribosomal structure and biogenesis	Cellular Component: chloroplast (GO:0009507);; Biological Process: primary metabolic process (GO:0044238);; Biological Process: cellular biosynthetic process (GO:0044249);; Biological Process: cellular macromolecule metabolic process (GO:0044260);; Biological Process: single-organism cellular process (GO:0044763);; Biological Process: organic substance biosynthetic process (GO:1901576);;	--	Elongation factor Ts OS=Synechococcus sp. (strain WH7803) GN=tsf PE=3 SV=1	PREDICTED: uncharacterized protein LOC100262932 [Vitis vinifera]
c34123.graph_c0	119.547	28.5489	0	-2.12853	down	--	Molecular Function: catalytic activity (GO:0003824);; Biological Process: metabolic process (GO:0008152);; Cellular Component: plastid (GO:0009536);;	--	Uncharacterized protein ycf23 OS=Porphyra purpurea GN=ycf23 PE=3 SV=1	PREDICTED: uncharacterized protein ycf23-like [Solanum lycopersicum]
c29185.graph_c1	22.6959	10.5156	2.67542e-05	-1.16771	down	--	Cellular Component: plastid (GO:0009536);; Molecular Function: hydrolase activity (GO:0016787);;	--	Nudix hydrolase 8 OS=Arabidopsis thaliana GN=NUDT8 PE=2 SV=2	PREDICTED: nudix hydrolase 8-like [Solanum lycopersicum]
c27047.graph_c1	10.9684	0.355817	0	-4.49352	down	--	--	--	Dirigent protein 22 OS=Arabidopsis thaliana GN=DIR22 PE=2 SV=1	hypothetical protein M569_08466 [Genlisea aurea]
c32190.graph_c0	147.175	75.6727	7.70523e-06	-1.02387	down	--	Cellular Component: extracellular region (GO:0005576);; Cellular Component: vacuole (GO:0005773);; Cellular Component: cytosol (GO:0005829);; Biological Process: glycolysis (GO:0006096);; Biological Process: proteolysis (GO:0006508);; Biological Process: calcium ion transport (GO:0006816);; Biological Process: water transport (GO:0006833);; Biological Process: hyperosmotic response (GO:0006972);;…	K01366|0.0|pop:POPTR_675847|hypothetical protein	Thiol protease aleurain OS=Arabidopsis thaliana GN=ALEU PE=1 SV=2	cysteine protease Cp1 [Actinidia deliciosa]
c28268.graph_c0	7.09755	1.08351	0	-2.74207	down	Cell wall/membrane/envelope biogenesis	Cellular Component: integral component of membrane (GO:0016021);; Molecular Function: cellulose synthase (UDP-forming) activity (GO:0016760);; Biological Process: cellulose biosynthetic process (GO:0030244);; Cellular Component: cell part (GO:0044464);;	--	Cellulose synthase-like protein E6 OS=Oryza sativa subsp. japonica GN=CSLE6 PE=2 SV=1	cellulose synthase-like protein CslE [Nicotiana tabacum]
c23543.graph_c0	8.70436	0.278885	0	-4.78212	down	--	--	--	Transcription factor bHLH25 OS=Arabidopsis thaliana GN=BHLH25 PE=2 SV=2	Basic helix-loop-helix DNA-binding superfamily protein, putative [Theobroma cacao]
c29959.graph_c0	13.1643	5.85907	1.10311e-05	-1.22469	down	Energy production and conversion	Molecular Function: formamidase activity (GO:0004328);; Cellular Component: vacuole (GO:0005773);; Biological Process: metabolic process (GO:0008152);;	K01455|0.0|vvi:100255878|hypothetical protein LOC100255878	Formamidase OS=Methylophilus methylotrophus GN=fmdA PE=1 SV=1	PREDICTED: formamidase-like [Solanum lycopersicum]
c42530.graph_c0	6.07482	1.7968	7.87981e-12	-1.80714	down	Lipid transport and metabolism	Biological Process: very long-chain fatty acid metabolic process (GO:0000038);; Molecular Function: nucleotide binding (GO:0000166);; Molecular Function: iron ion binding (GO:0005506);; Cellular Component: plasma membrane (GO:0005886);; Biological Process: fatty acid biosynthetic process (GO:0006633);; Biological Process: cuticle hydrocarbon biosynthetic process (GO:0006723);; Biological Process:…	--	Protein ECERIFERUM 3 OS=Arabidopsis thaliana GN=CER3 PE=1 SV=1	PREDICTED: protein ECERIFERUM 3-like [Solanum lycopersicum]
c26118.graph_c1	12.0504	1.99291	5.86424e-08	-2.54144	down	General function prediction only	Biological Process: metabolic process (GO:0008152);; Molecular Function: hydrolase activity (GO:0016787);;	--	Bifunctional epoxide hydrolase 2 OS=Mus musculus GN=Ephx2 PE=1 SV=2	uncharacterized protein LOC100790275 [Glycine max]
c32285.graph_c0	20.029	9.47352	0.0027553	-1.13088	down	--	Biological Process: metabolic process (GO:0008152);; Molecular Function: peptidase inhibitor activity (GO:0030414);;	--	Inhibitor of trypsin and hageman factor OS=Cucurbita maxima PE=1 SV=1	proteinase inhibitor [Jatropha curcas]
c33572.graph_c1	36.264	15.7509	1.11098e-08	-1.2654	down	Intracellular trafficking, secretion, and vesicular transport	Molecular Function: protein binding (GO:0005515);; Molecular Function: GTP binding (GO:0005525);; Cellular Component: signal recognition particle, endoplasmic reticulum targeting (GO:0005786);; Biological Process: GTP catabolic process (GO:0006184);; Biological Process: rRNA processing (GO:0006364);; Biological Process: SRP-dependent cotranslational protein targeting to membrane (GO:0006614);; Ce…	K03110|1e-159|vvi:100267692|hypothetical protein LOC100267692	Cell division protein FtsY homolog, chloroplastic OS=Arabidopsis thaliana GN=CPFTSY PE=1 SV=2	hypothetical protein M569_04639, partial [Genlisea aurea]
c29356.graph_c0	5.40254	2.04642	3.91659e-06	-1.44856	down	Amino acid transport and metabolism	Molecular Function: transporter activity (GO:0005215);; Biological Process: transport (GO:0006810);; Cellular Component: membrane (GO:0016020);;	--	Probable nitrite transporter At1g68570 OS=Arabidopsis thaliana GN=At1g68570 PE=2 SV=1	nitrate transporter, putative [Ricinus communis]
c30820.graph_c0	4617.69	2395.32	6.23267e-05	-1.01158	down	--	Molecular Function: nucleotide binding (GO:0000166);; Biological Process: alternative mRNA splicing, via spliceosome (GO:0000380);; Molecular Function: double-stranded DNA binding (GO:0003690);; Molecular Function: single-stranded DNA binding (GO:0003697);; Molecular Function: mRNA binding (GO:0003729);; Molecular Function: protein kinase activity (GO:0004672);; Cellular Component: cell wall (GO:…	--	Glycine-rich RNA-binding protein OS=Daucus carota PE=2 SV=1	PREDICTED: glycine-rich RNA-binding protein-like isoform 1 [Solanum lycopersicum]
c28425.graph_c0	91.2614	40.9689	1.84915e-08	-1.2187	down	--	Cellular Component: chloroplast thylakoid membrane (GO:0009535);;	--	--	predicted protein [Populus trichocarpa]
c39432.graph_c0	8.60476	3.47375	0.00215931	-1.34537	down	--	--	--	--	hypothetical protein [Antirrhinum hispanicum]
c18302.graph_c0	31.9649	12.8057	4.72122e-10	-1.38105	down	--	Cellular Component: mitochondrion (GO:0005739);; Biological Process: aromatic amino acid family biosynthetic process (GO:0009073);; Cellular Component: chloroplast (GO:0009507);; Biological Process: iron-sulfur cluster assembly (GO:0016226);;	--	--	PREDICTED: uncharacterized protein LOC101265893 [Solanum lycopersicum]
c40736.graph_c0	134.463	51.6777	8.01359e-13	-1.44338	down	Coenzyme transport and metabolism	Molecular Function: hydroxymethylbilane synthase activity (GO:0004418);; Biological Process: pentose-phosphate shunt (GO:0006098);; Biological Process: rRNA processing (GO:0006364);; Biological Process: ubiquinone biosynthetic process (GO:0006744);; Biological Process: protoporphyrinogen IX biosynthetic process (GO:0006782);; Biological Process: aromatic amino acid family biosynthetic process (GO…	K01749|0.0|ath:AT5G08280|HEMC	Porphobilinogen deaminase, chloroplastic OS=Arabidopsis thaliana GN=HEMC PE=1 SV=1	hypothetical protein M569_11740, partial [Genlisea aurea]
c29728.graph_c1	10.5972	3.84436	0.000273129	-1.49556	down	--	Molecular Function: acetyl-CoA carboxylase activity (GO:0003989);; Biological Process: fatty acid biosynthetic process (GO:0006633);; Cellular Component: acetyl-CoA carboxylase complex (GO:0009317);; Cellular Component: chloroplast stroma (GO:0009570);; Cellular Component: chloroplast envelope (GO:0009941);; Cellular Component: membrane (GO:0016020);; Molecular Function: transferase activity (GO:…	K01962|2e-38|vvi:100256854|hypothetical protein LOC100256854	Acetyl-coenzyme A carboxylase carboxyl transferase subunit alpha, chloroplastic OS=Arabidopsis thaliana GN=CAC3 PE=1 SV=1	Acetyl Co-enzyme a carboxylase carboxyltransferase alpha subunit isoform 1 [Theobroma cacao]
c35741.graph_c0	40.42	9.22513	0	-2.18995	down	Carbohydrate transport and metabolism	Cellular Component: nucleus (GO:0005634);; Cellular Component: cytosol (GO:0005829);; Biological Process: starch catabolic process (GO:0005983);; Biological Process: sucrose biosynthetic process (GO:0005986);; Biological Process: fructose metabolic process (GO:0006000);; Biological Process: response to abscisic acid (GO:0009737);; Biological Process: response to fructose (GO:0009750);; Biological…	K03841|0.0|vvi:100264087|hypothetical protein LOC100264087	Fructose-1,6-bisphosphatase, cytosolic OS=Solanum tuberosum PE=2 SV=1	Inositol monophosphatase family protein isoform 1 [Theobroma cacao]
c13749.graph_c0	3.51365	1.27026	0.00340276	-1.48829	down	--	--	--	11S globulin seed storage protein 2 OS=Sesamum indicum PE=2 SV=1	PREDICTED: 11S globulin seed storage protein 2 [Vitis vinifera]
c30666.graph_c0	55.1274	23.4741	3.9847e-10	-1.29562	down	Translation, ribosomal structure and biogenesis	Molecular Function: 3'-5'-exoribonuclease activity (GO:0000175);; Molecular Function: RNA binding (GO:0003723);; Molecular Function: polyribonucleotide nucleotidyltransferase activity (GO:0004654);; Biological Process: rRNA processing (GO:0006364);; Biological Process: mRNA processing (GO:0006397);; Biological Process: mRNA catabolic process (GO:0006402);; Biological Process: tRNA processing (GO:…	K00962|0.0|vvi:100265692|hypothetical protein LOC100265692	Probable polyribonucleotide nucleotidyltransferase 1, chloroplastic OS=Oryza sativa subsp. japonica GN=PNP1 PE=2 SV=1	PREDICTED: polyribonucleotide nucleotidyltransferase [Vitis vinifera]
c32460.graph_c0	8.10351	2.42658	5.68492e-05	-1.75426	down	--	Molecular Function: nucleic acid binding (GO:0003676);; Molecular Function: sequence-specific DNA binding transcription factor activity (GO:0003700);; Cellular Component: nucleus (GO:0005634);; Biological Process: regulation of transcription, DNA-templated (GO:0006355);; Biological Process: fatty acid beta-oxidation (GO:0006635);; Molecular Function: zinc ion binding (GO:0008270);; Biological Pro…	--	Zinc finger protein JACKDAW OS=Arabidopsis thaliana GN=JKD PE=1 SV=1	PREDICTED: zinc finger protein NUTCRACKER-like, partial [Cucumis sativus]
c14276.graph_c0	484.23	232.955	3.44538e-07	-1.12008	down	--	Cellular Component: mitochondrion (GO:0005739);; Biological Process: pentose-phosphate shunt (GO:0006098);; Biological Process: rRNA processing (GO:0006364);; Cellular Component: chloroplast (GO:0009507);; Cellular Component: photosystem I (GO:0009522);; Biological Process: plastid organization (GO:0009657);; Biological Process: photosynthesis, light harvesting in photosystem I (GO:0009768);; Bio…	K14332|3e-73|rcu:RCOM_1282260|hypothetical protein	--	putative 16kDa membrane protein [Nicotiana tabacum]
c29882.graph_c0	11.8543	4.67577	3.8088e-06	-1.39311	down	--	--	--	--	PREDICTED: uncharacterized protein LOC100257638 [Vitis vinifera]
c39700.graph_c0	10.0852	3.05617	1.46272e-12	-1.77533	down	--	Molecular Function: nucleotide binding (GO:0000166);; Molecular Function: protein kinase activity (GO:0004672);; Biological Process: phosphorylation (GO:0016310);;	--	G-type lectin S-receptor-like serine/threonine-protein kinase At4g27290 OS=Arabidopsis thaliana GN=At4g27290 PE=3 SV=4	PREDICTED: G-type lectin S-receptor-like serine/threonine-protein kinase At4g27290-like [Solanum lycopersicum]
c33486.graph_c0	61.8865	22.12	2.86438e-14	-1.54719	down	General function prediction only	--	--	Ankyrin repeat-containing protein At3g12360 OS=Arabidopsis thaliana GN=At3g12360 PE=2 SV=1	PREDICTED: ankyrin repeat-containing protein At3g12360-like [Solanum lycopersicum]
c18488.graph_c1	37.7852	19.3796	8.52355e-05	-1.02463	down	--	Cellular Component: nucleus (GO:0005634);; Biological Process: response to UV-B (GO:0010224);;	--	--	PREDICTED: uncharacterized protein LOC100262899 [Vitis vinifera]
c30800.graph_c0	43.4722	18.6463	4.06916e-08	-1.28199	down	--	Biological Process: maltose metabolic process (GO:0000023);; Biological Process: pentose-phosphate shunt (GO:0006098);; Biological Process: rRNA processing (GO:0006364);; Cellular Component: chloroplast thylakoid membrane (GO:0009535);; Cellular Component: chloroplast stroma (GO:0009570);; Biological Process: plastid organization (GO:0009657);; Biological Process: stomatal complex morphogenesis (…	--	Zeaxanthin epoxidase, chloroplastic OS=Solanum lycopersicum PE=2 SV=1	PREDICTED: uncharacterized protein LOC101252420 [Solanum lycopersicum]
c18321.graph_c1	21.5457	7.2409	1.26969e-06	-1.61367	down	--	Molecular Function: methyltransferase activity (GO:0008168);;	--	Trans-resveratrol di-O-methyltransferase OS=Vitis vinifera GN=ROMT PE=1 SV=2	unnamed protein product [Vitis vinifera]
c40411.graph_c0	237.732	80.4657	1.11022e-16	-1.62677	down	--	Molecular Function: structural constituent of ribosome (GO:0003735);; Cellular Component: ribosome (GO:0005840);; Biological Process: translation (GO:0006412);; Cellular Component: chloroplast (GO:0009507);; Biological Process: ribosome biogenesis (GO:0042254);;	--	50S ribosomal protein L34, chloroplastic OS=Arabidopsis thaliana GN=RPL34 PE=2 SV=1	PREDICTED: 50S ribosomal protein L34, chloroplastic-like [Solanum lycopersicum]
c21999.graph_c0	1.23051	0.287698	0.00429594	-2.02114	down	--	Biological Process: respiratory burst involved in defense response (GO:0002679);; Molecular Function: protein kinase activity (GO:0004672);; Molecular Function: binding (GO:0005488);; Cellular Component: plasma membrane (GO:0005886);; Biological Process: protein targeting to membrane (GO:0006612);; Biological Process: response to oxidative stress (GO:0006979);; Biological Process: response to wou…	--	G-type lectin S-receptor-like serine/threonine-protein kinase B120 OS=Arabidopsis thaliana GN=B120 PE=1 SV=1	PREDICTED: G-type lectin S-receptor-like serine/threonine-protein kinase B120-like [Vitis vinifera]
c29858.graph_c0	36.2411	2.42198	0	-3.93461	down	General function prediction only	Biological Process: metabolic process (GO:0008152);; Biological Process: systemic acquired resistance, salicylic acid mediated signaling pathway (GO:0009862);; Molecular Function: lipase activity (GO:0016298);; Molecular Function: methyl salicylate esterase activity (GO:0080031);;	--	Salicylic acid-binding protein 2 OS=Nicotiana tabacum GN=SABP2 PE=1 SV=1	protein S [Catharanthus roseus]
c35336.graph_c0	90.9198	46.2562	7.52343e-06	-1.0384	down	Posttranslational modification, protein turnover, chaperones	Biological Process: response to stress (GO:0006950);;	--	DnaJ homolog subfamily B member 6 OS=Xenopus tropicalis GN=dnajb6 PE=2 SV=1	PREDICTED: chaperone protein DnaJ-like [Solanum lycopersicum]
c38464.graph_c1	13.1474	5.13244	9.5155e-10	-1.41684	down	--	--	--	F-box/LRR-repeat protein At4g14096 OS=Arabidopsis thaliana GN=At4g14096 PE=2 SV=1	PREDICTED: putative F-box protein At3g58860-like [Solanum lycopersicum]
c3227.graph_c0	1.33328	0.0607042	0.00323802	-3.3694	down	--	--	--	Probable WRKY transcription factor 30 OS=Arabidopsis thaliana GN=WRKY30 PE=2 SV=1	WRKY transcription factor 53 [Jatropha curcas]
c39429.graph_c0	15.0825	7.43936	3.07314e-05	-1.08033	down	Inorganic ion transport and metabolism	Molecular Function: catalytic activity (GO:0003824);; Biological Process: metabolic process (GO:0008152);; Molecular Function: pyridoxal phosphate binding (GO:0030170);;	--	Uncharacterized protein YnbB OS=Bacillus subtilis (strain 168) GN=ynbB PE=4 SV=2	predicted protein [Populus trichocarpa]
c39111.graph_c0	26.3806	11.2932	7.60301e-09	-1.28602	down	--	Cellular Component: mitochondrion (GO:0005739);; Biological Process: pentose-phosphate shunt (GO:0006098);; Biological Process: rRNA processing (GO:0006364);; Biological Process: tRNA metabolic process (GO:0006399);; Cellular Component: chloroplast (GO:0009507);; Biological Process: chloroplast organization (GO:0009658);;	--	Pentatricopeptide repeat-containing protein At3g59040 OS=Arabidopsis thaliana GN=At3g59040 PE=2 SV=2	PREDICTED: pentatricopeptide repeat-containing protein At3g59040-like [Solanum lycopersicum]
c25483.graph_c0	35.3781	8.39951	0	-2.13114	down	--	Biological Process: maltose metabolic process (GO:0000023);; Molecular Function: calcium ion binding (GO:0005509);; Biological Process: pentose-phosphate shunt (GO:0006098);; Biological Process: rRNA processing (GO:0006364);; Cellular Component: chloroplast thylakoid membrane (GO:0009535);; Cellular Component: chloroplast thylakoid lumen (GO:0009543);; Biological Process: response to blue light (…	--	PsbP domain-containing protein 3, chloroplastic OS=Arabidopsis thaliana GN=PPD3 PE=1 SV=2	PREDICTED: psbP domain-containing protein 3, chloroplastic-like [Solanum lycopersicum]
c15955.graph_c0	3.67875	0	3.59379e-07	-4.74955	down	Carbohydrate transport and metabolism	Molecular Function: hydrolase activity, acting on glycosyl bonds (GO:0016798);;	--	Beta-glucosidase 13 OS=Oryza sativa subsp. japonica GN=BGLU13 PE=2 SV=2	unknown [Lotus japonicus]
c35925.graph_c0	35.5611	14.3679	4.6591e-10	-1.36915	down	--	Cellular Component: chloroplast (GO:0009507);;	--	--	PREDICTED: uncharacterized protein LOC100249177 [Vitis vinifera]
c14358.graph_c0	177.015	73.2323	2.07195e-10	-1.33646	down	Function unknown	Biological Process: glycolysis (GO:0006096);; Biological Process: water transport (GO:0006833);; Biological Process: Golgi organization (GO:0007030);; Biological Process: response to cold (GO:0009409);; Biological Process: response to abscisic acid (GO:0009737);; Cellular Component: integral component of membrane (GO:0016021);; Biological Process: hyperosmotic salinity response (GO:0042538);; Bio…	--	Hydrophobic protein RCI2B OS=Arabidopsis thaliana GN=RCI2B PE=2 SV=1	hypothetical protein PRUPE_ppa013857mg [Prunus persica]
c23701.graph_c0	5.79724	0.933029	3.85663e-05	-2.51158	down	--	Molecular Function: DNA binding (GO:0003677);; Molecular Function: sequence-specific DNA binding transcription factor activity (GO:0003700);; Cellular Component: nucleus (GO:0005634);; Biological Process: regulation of transcription, DNA-templated (GO:0006355);; Molecular Function: protein dimerization activity (GO:0046983);; Biological Process: ovule development (GO:0048481);;	--	Agamous-like MADS-box protein AGL8 homolog OS=Solanum lycopersicum GN=TDR4 PE=2 SV=1	MADS-box transcription factor DEFH28 [Antirrhinum majus]
c25735.graph_c1	6.2605	1.60012	0.00203236	-1.9261	down	--	Molecular Function: sequence-specific DNA binding transcription factor activity (GO:0003700);; Molecular Function: protein binding (GO:0005515);; Cellular Component: nucleus (GO:0005634);; Biological Process: regulation of transcription, DNA-templated (GO:0006355);; Cellular Component: chloroplast (GO:0009507);; Biological Process: jasmonic acid metabolic process (GO:0009694);; Biological Process…	--	Transcription factor TCP13 OS=Arabidopsis thaliana GN=TCP13 PE=1 SV=1	PREDICTED: transcription factor TCP13-like [Glycine max]
c39071.graph_c0	5.31694	2.39176	0.000105226	-1.20657	down	--	Biological Process: RNA splicing, via endonucleolytic cleavage and ligation (GO:0000394);; Cellular Component: extracellular region (GO:0005576);; Cellular Component: nucleus (GO:0005634);; Cellular Component: endosome (GO:0005768);; Cellular Component: vacuolar membrane (GO:0005774);; Cellular Component: Golgi apparatus (GO:0005794);; Cellular Component: trans-Golgi network (GO:0005802);; Cellul…	--	Transmembrane 9 superfamily member 4 OS=Mus musculus GN=Tm9sf4 PE=2 SV=1	PREDICTED: transmembrane 9 superfamily member 4-like [Cucumis sativus]
c31534.graph_c0	176.361	90.1178	5.9804e-06	-1.03266	down	--	Cellular Component: cytochrome b6f complex (GO:0009512);; Cellular Component: chloroplast thylakoid membrane (GO:0009535);; Biological Process: cellular component organization (GO:0016043);; Biological Process: cellular component biogenesis (GO:0044085);; Biological Process: cellular metabolic process (GO:0044237);;	--	Cytochrome b6-f complex subunit 7 (Fragment) OS=Spinacia oleracea GN=petM PE=1 SV=1	PREDICTED: uncharacterized protein LOC100255593 [Vitis vinifera]
c36494.graph_c1	73.7094	31.041	1.7235e-10	-1.31181	down	--	Molecular Function: magnesium ion binding (GO:0000287);; Molecular Function: electron carrier activity (GO:0009055);; Cellular Component: photosystem I (GO:0009522);; Cellular Component: chloroplast thylakoid membrane (GO:0009535);; Biological Process: photosynthesis (GO:0015979);; Cellular Component: integral component of membrane (GO:0016021);; Molecular Function: chlorophyll binding (GO:001616…	K02689|0.0|vvi:4025091|psaA	Photosystem I P700 chlorophyll a apoprotein A1 OS=Coffea arabica GN=psaA PE=3 SV=1	photosystem I P700 apoprotein A1 [Antirrhinum majus]
c41438.graph_c0	33.1911	14.1103	1.34471e-08	-1.29535	down	Translation, ribosomal structure and biogenesis	Molecular Function: RNA binding (GO:0003723);; Biological Process: aromatic amino acid family biosynthetic process (GO:0009073);; Cellular Component: chloroplast (GO:0009507);; Biological Process: carotenoid biosynthetic process (GO:0016117);; Biological Process: iron-sulfur cluster assembly (GO:0016226);; Biological Process: isopentenyl diphosphate biosynthetic process, methylerythritol 4-phosph…	--	RNA-binding protein YhbY OS=Shigella flexneri GN=yhbY PE=4 SV=1	PREDICTED: uncharacterized protein LOC101264983 [Solanum lycopersicum]
c27274.graph_c2	21.9767	5.24453	3.49426e-07	-2.07103	down	--	Cellular Component: nucleus (GO:0005634);; Biological Process: regulation of transcription, DNA-templated (GO:0006355);; Biological Process: regulation of translation (GO:0006417);; Biological Process: response to water deprivation (GO:0009414);; Biological Process: response to light stimulus (GO:0009416);; Cellular Component: plastid (GO:0009536);; Biological Process: response to wounding (GO:00…	--	Auxin-responsive protein IAA14 OS=Arabidopsis thaliana GN=IAA14 PE=1 SV=2	Indole-3-acetic acid inducible 14 isoform 2, partial [Theobroma cacao]
c27540.graph_c0	5.90793	2.80592	0.00179513	-1.12629	down	--	Biological Process: metabolic process (GO:0008152);; Molecular Function: pyridoxal phosphate binding (GO:0030170);; Molecular Function: alliin lyase activity (GO:0047654);;	--	Tryptophan aminotransferase-related protein 4 OS=Arabidopsis thaliana GN=TAR4 PE=2 SV=2	unnamed protein product [Vitis vinifera]
c32888.graph_c1	11.3225	4.29105	0.000224125	-1.43791	down	Posttranslational modification, protein turnover, chaperones	--	--	Chaperone protein dnaJ 20, chloroplastic OS=Arabidopsis thaliana GN=ATJ20 PE=2 SV=2	predicted protein [Populus trichocarpa]
c33196.graph_c0	2.09547	0.82397	0.000696476	-1.38473	down	Defense mechanisms	Molecular Function: ATP binding (GO:0005524);; Cellular Component: plasma membrane (GO:0005886);; Biological Process: ATP catabolic process (GO:0006200);; Biological Process: drug transmembrane transport (GO:0006855);; Molecular Function: organic phosphonate transmembrane-transporting ATPase activity (GO:0015416);; Biological Process: cuticle development (GO:0042335);;	--	ABC transporter G family member 32 OS=Arabidopsis thaliana GN=ABCG32 PE=1 SV=1	hypothetical protein M569_07990, partial [Genlisea aurea]
c32042.graph_c0	137.576	36.5531	0	-1.97418	down	--	--	--	Phylloplanin OS=Nicotiana tabacum PE=1 SV=1	predicted protein [Populus trichocarpa]
c36490.graph_c0	26.6875	12.1269	1.56743e-07	-1.20002	down	General function prediction only	Biological Process: maltose metabolic process (GO:0000023);; Cellular Component: plasma membrane (GO:0005886);; Cellular Component: plastoglobule (GO:0010287);; Biological Process: chlorophyll catabolic process (GO:0015996);; Molecular Function: kinase activity (GO:0016301);; Biological Process: phosphorylation (GO:0016310);; Biological Process: starch biosynthetic process (GO:0019252);; Biologic…	K08869|0.0|vvi:100243380|hypothetical protein LOC100243380	Uncharacterized aarF domain-containing protein kinase At5g05200, chloroplastic OS=Arabidopsis thaliana GN=At5g05200 PE=1 SV=1	PREDICTED: uncharacterized aarF domain-containing protein kinase At5g05200, chloroplastic-like [Solanum lycopersicum]
c34461.graph_c0	35.7849	14.7392	2.50533e-09	-1.34096	down	--	Molecular Function: calcium ion binding (GO:0005509);; Molecular Function: protein binding (GO:0005515);; Cellular Component: chloroplast thylakoid lumen (GO:0009543);; Cellular Component: chloroplast stroma (GO:0009570);; Cellular Component: photosystem II oxygen evolving complex (GO:0009654);; Cellular Component: extrinsic component of membrane (GO:0019898);; Cellular Component: chloroplast pho…	--	PsbP domain-containing protein 1, chloroplastic OS=Arabidopsis thaliana GN=PPD1 PE=1 SV=1	predicted protein [Populus trichocarpa]
c14330.graph_c0	1803.66	844.674	2.23568e-07	-1.15906	down	--	Molecular Function: calcium ion binding (GO:0005509);; Molecular Function: poly(U) RNA binding (GO:0008266);; Cellular Component: chloroplast thylakoid membrane (GO:0009535);; Cellular Component: chloroplast thylakoid lumen (GO:0009543);; Cellular Component: photosystem II oxygen evolving complex (GO:0009654);; Biological Process: photoinhibition (GO:0010205);; Biological Process: photosystem II …	K02716|0.0|pop:POPTR_813989|photosystem II oxygen-evolving complex 33 KDa subunit	Oxygen-evolving enhancer protein 1, chloroplastic OS=Nicotiana tabacum GN=PSBO PE=2 SV=1	chloroplast PsbO4 precursor [Nicotiana benthamiana]
c15971.graph_c0	3.15687	0.682731	0.00297134	-2.11581	down	Posttranslational modification, protein turnover, chaperones	Molecular Function: glutathione transferase activity (GO:0004364);; Biological Process: response to oxidative stress (GO:0006979);;	K00799|1e-102|pop:POPTR_678517|hypothetical protein	Glutathione S-transferase F11 OS=Arabidopsis thaliana GN=GSTF11 PE=2 SV=1	glutathione S-transferase [Perilla frutescens var. crispa]
c37039.graph_c0	4.66909	1.21814	1.05317e-08	-1.96538	down	--	Molecular Function: ubiquitin-protein ligase activity (GO:0004842);; Cellular Component: nucleus (GO:0005634);; Biological Process: ubiquitin-dependent protein catabolic process (GO:0006511);; Biological Process: protein ubiquitination (GO:0016567);;	--	F-box/LRR-repeat protein 14 OS=Arabidopsis thaliana GN=FBL14 PE=2 SV=1	predicted protein [Populus trichocarpa]
c21886.graph_c0	3.61513	0.954665	6.63395e-07	-1.93672	down	--	Biological Process: response to cytokinin (GO:0009735);;	--	--	conserved hypothetical protein [Ricinus communis]
c34947.graph_c0	12.0092	4.30588	2.53502e-06	-1.52433	down	--	--	--	--	PREDICTED: uncharacterized protein LOC101254125 [Solanum lycopersicum]
c40564.graph_c0	103.649	47.9898	6.04873e-08	-1.17452	down	Energy production and conversion	Biological Process: maltose metabolic process (GO:0000023);; Molecular Function: ferredoxin-NAD(P) reductase activity (GO:0008937);; Cellular Component: chloroplast stroma (GO:0009570);; Cellular Component: chloroplast envelope (GO:0009941);; Biological Process: starch biosynthetic process (GO:0019252);; Molecular Function: ferredoxin:thioredoxin reductase activity (GO:0030385);; Biological Proce…	--	Ferredoxin-thioredoxin reductase catalytic chain, chloroplastic OS=Spinacia oleracea PE=2 SV=1	chloroplast ferredoxin-thioredoxin reductase catalytic chain [Nicotiana benthamiana]
c19546.graph_c0	78.007	22.8584	0	-1.83344	down	General function prediction only	Molecular Function: ATP binding (GO:0005524);; Cellular Component: nucleus (GO:0005634);; Molecular Function: glycerate kinase activity (GO:0008887);; Cellular Component: chloroplast stroma (GO:0009570);; Biological Process: photorespiration (GO:0009853);; Cellular Component: chloroplast envelope (GO:0009941);; Biological Process: phosphorylation (GO:0016310);;	--	D-glycerate 3-kinase, chloroplastic OS=Arabidopsis thaliana GN=GLYK PE=1 SV=2	D-glycerate 3-kinase [Medicago truncatula]
c40484.graph_c0	221.1	109.078	1.04014e-06	-1.0835	down	Posttranslational modification, protein turnover, chaperones	Molecular Function: peroxidase activity (GO:0004601);; Molecular Function: protein binding (GO:0005515);; Biological Process: rRNA processing (GO:0006364);; Cellular Component: chloroplast stromal thylakoid (GO:0009533);; Cellular Component: chloroplast thylakoid membrane (GO:0009535);; Cellular Component: chloroplast envelope (GO:0009941);; Cellular Component: plastoglobule (GO:0010287);; Biolog…	K03564|1e-109|pop:POPTR_589333|PtrcPrx_Q.1	Peroxiredoxin Q, chloroplastic OS=Populus jackii GN=PRXQ PE=1 SV=1	Thioredoxin superfamily protein, Q [Theobroma cacao]
c32039.graph_c0	139.413	64.0825	2.77744e-08	-1.18538	down	Amino acid transport and metabolism	Molecular Function: lactoylglutathione lyase activity (GO:0004462);; Biological Process: carbohydrate metabolic process (GO:0005975);; Biological Process: response to cold (GO:0009409);; Cellular Component: chloroplast stroma (GO:0009570);; Cellular Component: stromule (GO:0010319);; Biological Process: methylglyoxal catabolic process to D-lactate (GO:0019243);; Cellular Component: thylakoid lume…	K01759|0.0|vvi:100252461|similar to lactoylglutathione lyase, putative / glyoxalase I, putative	Probable lactoylglutathione lyase, chloroplast OS=Arabidopsis thaliana GN=At1g67280 PE=2 SV=1	hypothetical protein PRUPE_ppa007643mg [Prunus persica]
c41872.graph_c0	22.1267	5.67414	0	-2.01869	down	--	Molecular Function: calmodulin binding (GO:0005516);; Cellular Component: chloroplast inner membrane (GO:0009706);; Biological Process: protein transport (GO:0015031);; Molecular Function: protochlorophyllide reductase activity (GO:0016630);; Biological Process: oxidation-reduction process (GO:0055114);;	--	Short-chain dehydrogenase TIC 32, chloroplastic OS=Pisum sativum GN=TIC32 PE=1 SV=1	PREDICTED: short-chain dehydrogenase TIC 32, chloroplastic-like [Solanum lycopersicum]
c30272.graph_c2	28.6646	13.2792	0.000375335	-1.16376	down	--	Molecular Function: protein serine/threonine kinase activity (GO:0004674);; Molecular Function: ATP binding (GO:0005524);; Cellular Component: nucleus (GO:0005634);; Cellular Component: cytosol (GO:0005829);; Biological Process: sucrose metabolic process (GO:0005985);; Biological Process: protein phosphorylation (GO:0006468);; Biological Process: unsaturated fatty acid biosynthetic process (GO:00…	K14498|5e-82|sbi:SORBI_01g007120|hypothetical protein	Serine/threonine-protein kinase SAPK8 OS=Oryza sativa subsp. japonica GN=SAPK8 PE=2 SV=1	PREDICTED: serine/threonine-protein kinase SRK2I-like [Solanum lycopersicum]
c35810.graph_c0	32.9108	15.2802	4.40154e-07	-1.16899	down	--	Molecular Function: translation initiation factor activity (GO:0003743);; Biological Process: rRNA processing (GO:0006364);; Biological Process: translational initiation (GO:0006413);; Cellular Component: chloroplast thylakoid (GO:0009534);; Biological Process: response to blue light (GO:0009637);; Biological Process: response to red light (GO:0010114);; Biological Process: photosystem II assembl…	--	Uncharacterized protein ycf39 OS=Cyanophora paradoxa GN=ycf39 PE=3 SV=1	PREDICTED: uncharacterized protein ycf39-like isoform 2 [Solanum lycopersicum]
c38257.graph_c0	21.3812	8.69548	3.5483e-10	-1.36014	down	--	Cellular Component: mitochondrion (GO:0005739);; Cellular Component: chloroplast (GO:0009507);; Biological Process: embryo development ending in seed dormancy (GO:0009793);; Biological Process: thylakoid membrane organization (GO:0010027);; Biological Process: vegetative to reproductive phase transition of meristem (GO:0010228);; Biological Process: iron-sulfur cluster assembly (GO:0016226);; Bio…	--	Pentatricopeptide repeat-containing protein At3g53700, chloroplastic OS=Arabidopsis thaliana GN=MEE40 PE=2 SV=1	PREDICTED: pentatricopeptide repeat-containing protein At3g53700, chloroplastic-like [Solanum lycopersicum]
c37145.graph_c0	30.7478	14.8508	4.3273e-06	-1.11168	down	--	Biological Process: maltose metabolic process (GO:0000023);; Cellular Component: chloroplast (GO:0009507);; Biological Process: photosystem II assembly (GO:0010207);; Biological Process: starch biosynthetic process (GO:0019252);; Biological Process: positive regulation of catalytic activity (GO:0043085);;	--	--	PREDICTED: uncharacterized protein LOC101264675 [Solanum lycopersicum]
c38676.graph_c0	19.4027	9.59864	4.00383e-06	-1.07816	down	--	Biological Process: Group II intron splicing (GO:0000373);; Molecular Function: RNA binding (GO:0003723);; Cellular Component: chloroplast (GO:0009507);; Biological Process: seed development (GO:0048316);;	--	Chloroplastic group IIA intron splicing facilitator CRS1, chloroplastic OS=Zea mays GN=CRS1 PE=1 SV=1	PREDICTED: chloroplastic group IIA intron splicing facilitator CRS1, chloroplastic-like [Solanum lycopersicum]
c42264.graph_c0	18.1075	4.5605	1.44329e-15	-2.03801	down	--	Molecular Function: catalytic activity (GO:0003824);; Molecular Function: zinc ion binding (GO:0008270);; Cellular Component: chloroplast (GO:0009507);; Biological Process: leaf morphogenesis (GO:0009965);; Biological Process: mRNA modification (GO:0016556);; Biological Process: cell differentiation (GO:0030154);;	--	--	PREDICTED: uncharacterized protein LOC101247419 [Solanum lycopersicum]
c17497.graph_c0	11.5159	4.30099	3.85332e-08	-1.4749	down	Inorganic ion transport and metabolism	Molecular Function: inositol-1,4-bisphosphate 1-phosphatase activity (GO:0004441);; Biological Process: sulfur compound metabolic process (GO:0006790);; Molecular Function: 3'(2'),5'-bisphosphate nucleotidase activity (GO:0008441);; Cellular Component: chloroplast (GO:0009507);; Biological Process: phosphatidylinositol phosphorylation (GO:0046854);;	K01082|0.0|pop:POPTR_1075024|hypothetical protein	Putative PAP-specific phosphatase, mitochondrial OS=Arabidopsis thaliana GN=At4g05090 PE=2 SV=1	PREDICTED: putative PAP-specific phosphatase, mitochondrial-like [Solanum lycopersicum]
c33299.graph_c0	7.83535	3.66522	0.0025795	-1.14616	down	General function prediction only	Biological Process: systemic acquired resistance, salicylic acid mediated signaling pathway (GO:0009862);; Molecular Function: lipase activity (GO:0016298);; Biological Process: monocarboxylic acid metabolic process (GO:0032787);; Molecular Function: methyl salicylate esterase activity (GO:0080031);;	--	Salicylic acid-binding protein 2 OS=Nicotiana tabacum GN=SABP2 PE=1 SV=1	RecName: Full=Salicylic acid-binding protein 2; Short=NtSABP2; AltName: Full=Methyl salicylate esterase
c33292.graph_c0	14.6264	7.39796	8.90675e-05	-1.04404	down	Translation, ribosomal structure and biogenesis	Biological Process: RNA methylation (GO:0001510);; Molecular Function: RNA binding (GO:0003723);; Cellular Component: mitochondrion (GO:0005739);; Biological Process: RNA processing (GO:0006396);; Molecular Function: RNA methyltransferase activity (GO:0008173);; Cellular Component: plastid (GO:0009536);;	--	Uncharacterized RNA methyltransferase CT0009 OS=Chlorobium tepidum (strain ATCC 49652 / DSM 12025 / TLS) GN=CT0009 PE=3 SV=1	hypothetical protein M569_04360, partial [Genlisea aurea]
c32291.graph_c0	5.69259	0.1407	9.21766e-08	-4.21358	down	--	Biological Process: stomatal complex morphogenesis (GO:0010103);;	--	--	IQ-domain 21, putative isoform 2 [Theobroma cacao]
c26894.graph_c0	17.45	6.38964	5.61067e-07	-1.49839	down	--	Biological Process: cytochrome b6f complex assembly (GO:0010190);; Cellular Component: thylakoid membrane (GO:0042651);;	--	--	PREDICTED: uncharacterized protein LOC100256905 [Vitis vinifera]
c37807.graph_c0	5.04598	2.38432	0.00618253	-1.12999	down	--	Molecular Function: endonuclease activity (GO:0004519);; Cellular Component: mitochondrion (GO:0005739);; Cellular Component: chloroplast (GO:0009507);; Biological Process: mRNA modification (GO:0016556);;	--	Pentatricopeptide repeat-containing protein At1g11290 OS=Arabidopsis thaliana GN=PCMP-H40 PE=2 SV=1	PREDICTED: pentatricopeptide repeat-containing protein At1g11290-like [Vitis vinifera]
c24643.graph_c1	5.36993	1.09303	3.2723e-08	-2.28562	down	--	--	--	--	PREDICTED: uncharacterized protein LOC101255640 [Solanum lycopersicum]
c30590.graph_c0	247.241	101.579	3.83548e-11	-1.34744	down	Translation, ribosomal structure and biogenesis	Molecular Function: structural constituent of ribosome (GO:0003735);; Biological Process: translation (GO:0006412);; Cellular Component: chloroplast stroma (GO:0009570);; Cellular Component: chloroplast envelope (GO:0009941);; Cellular Component: membrane (GO:0016020);; Biological Process: isopentenyl diphosphate biosynthetic process, methylerythritol 4-phosphate pathway (GO:0019288);; Biological…	K02931|1e-127|ath:AT4G01310|ribosomal protein L5 family protein	50S ribosomal protein L5, chloroplastic OS=Arabidopsis thaliana GN=RPL5 PE=2 SV=1	hypothetical protein M569_16035, partial [Genlisea aurea]
[truncated: 814 more rows]
